# Supplementary material
Source: PubMed Central journal article supplement (PMC8097676)

**Table S4. Results of AOP analyses for major 190 chemicals.**

| AOP Name                                                                                                         | Counts                   | Major chemicals and processes        |                                                                   |                                                                                                                               |
|------------------------------------------------------------------------------------------------------------------|--------------------------|--------------------------------------|-------------------------------------------------------------------|-------------------------------------------------------------------------------------------------------------------------------|
| 200 Estrogen receptor activation leading to breast cancer                                                        | 37                       | Chemical Name                        | CAS No.                                                           | Process in Semiconductor                                                                                                      |
|                                                                                                                  |                          | 2,2',6,6'-Tetrabromobisphenol A      | 79-94-7                                                           | Semiconductor and other electronic component manufacturing                                                                    |
|                                                                                                                  |                          | 2-Butoxyethanol                      | 111-76-2                                                          | Overall Chip assembly                                                                                                         |
|                                                                                                                  |                          | Acetaldehyde                         | 75-07-0                                                           | Mold, Chip assembly                                                                                                           |
|                                                                                                                  |                          | Antimony trichloride                 | 10025-91-9                                                        | Semiconductor Manufacturing                                                                                                   |
|                                                                                                                  |                          | Arsenic trioxide                     | 1327-53-3                                                         | Semiconductor Manufacturing                                                                                                   |
|                                                                                                                  |                          | Bisphenol A                          | 80-05-7                                                           | Packaging                                                                                                                     |
|                                                                                                                  |                          | Catechol                             | 120-80-9                                                          | Wafer processing, Photo/PR removal                                                                                            |
|                                                                                                                  |                          | Diethanolamine                       | 111-42-2                                                          | Stripper: Used to remove unnecessary photoresist layers after photo-resist patterning and development during photo processing |
|                                                                                                                  |                          | Ethylene glycol                      | 107-21-1                                                          | CVD, Dry etching, Wafer processing, Ion implantation                                                                          |
|                                                                                                                  |                          | Glycerol                             | 56-81-5                                                           | Solder ball attachment, Chip assembly                                                                                         |
|                                                                                                                  |                          | n-Butyl alcohol                      | 71-36-3                                                           | Semiconductor Manufacturing                                                                                                   |
|                                                                                                                  |                          | Perfluorooctane sulfonic acid        | 1763-23-1                                                         | Photomicroolithography                                                                                                        |
|                                                                                                                  |                          | Phenol                               | 108-95-2                                                          | Mold, Chip assembly                                                                                                           |
|                                                                                                                  |                          | Tetrachloroethylene                  | 127-18-4                                                          | Mold, Chip adhesion, Chip assembly, Testing                                                                                   |
|                                                                                                                  |                          | Zinc chloride fume                   | 7646-85-7                                                         | Semiconductor Manufacturing                                                                                                   |
|                                                                                                                  |                          | 1-Methoxy-2-propanol                 | 107-98-2                                                          | Wafer processing, Photo (PR solvent)                                                                                          |
|                                                                                                                  |                          | 1-nitronaphthalene                   | 86-57-7                                                           | Small Molecule Semiconductor Building Blocks                                                                                  |
|                                                                                                                  |                          | 2-Methoxyethanol                     | 109-86-4                                                          | Manufacture of wafers for semiconductor manufacturing                                                                         |
|                                                                                                                  |                          | 4-Chloro-2-methylphenol              | 1570-64-5                                                         | Semiconductor Manufacturing                                                                                                   |
| Diethylene glycol monobutyl ether                                                                                | 112-34-5                 | Semiconductor Manufacturing          |                                                                   |                                                                                                                               |
| Diethylene glycol monobutyl ether                                                                                | 112-34-5                 | Semiconductor Manufacturing          |                                                                   |                                                                                                                               |
| Dimethyl acetamide                                                                                               | 127-19-5                 | Photo (Diluent)                      |                                                                   |                                                                                                                               |
| Nitrobenzene                                                                                                     | 98-95-3                  | Semiconductor Manufacturing          |                                                                   |                                                                                                                               |
| Indium phosphide                                                                                                 | 22398-80-7               | Manufacture of semiconductor wafers  |                                                                   |                                                                                                                               |
| Methyl-3-methoxy propionate                                                                                      | 3852-09-3                | Wafer processing, Photo (PR solvent) |                                                                   |                                                                                                                               |
| Piperazine                                                                                                       | 110-85-0                 | Chip assembly, Rear Grinding         |                                                                   |                                                                                                                               |
| Tetramethyl ammonium hydroxide                                                                                   | 75-59-2                  |                                      |                                                                   |                                                                                                                               |
|                                                                                                                  | 10424-66-                |                                      |                                                                   |                                                                                                                               |
|                                                                                                                  | 5(Trihydrate)            |                                      | Wafer processing, Chip assembly, Photo (developer), Rear Grinding |                                                                                                                               |
|                                                                                                                  | 10424-65-4(Pentahydrate) |                                      |                                                                   |                                                                                                                               |
| Trimellitic anhydride                                                                                            | 552-30-7                 | -                                    |                                                                   |                                                                                                                               |
| 187 Anticoagulant rodenticide inhibition of vitamin K epoxide reductase resulting in coagulopathy and hemorrhage | 31                       | Chemical Name                        | CAS No.                                                           | Process in Semiconductor                                                                                                      |
|                                                                                                                  |                          |                                      | 156-59-2                                                          |                                                                                                                               |
|                                                                                                                  |                          | 1,2-Dichloroethylene, all isomers    | 156-60-5                                                          | Washing                                                                                                                       |
|                                                                                                                  |                          |                                      | 540-59-0                                                          |                                                                                                                               |
|                                                                                                                  |                          | 2,2',6,6'-Tetrabromobisphenol A      | 79-94-7                                                           | Semiconductor and other electronic component manufacturing                                                                    |
|                                                                                                                  |                          | Acetaldehyde                         | 75-07-0                                                           | Mold, Chip assembly                                                                                                           |
|                                                                                                                  |                          | Acetone                              | 67-64-1                                                           | Overall process, Mold, Wafer processing, Printing, Chip adhesion, Chip assembly                                               |

|                                   |                          |                                                                                                   |
|-----------------------------------|--------------------------|---------------------------------------------------------------------------------------------------|
| Antimony trichloride              | 10025-91-9               | Semiconductor Manufacturing                                                                       |
| Arsenic trioxide                  | 1327-53-3                | Semiconductor Manufacturing                                                                       |
| Bisphenol A                       | 80-05-7                  | Packaging                                                                                         |
| Catechol                          | 120-80-9                 | Wafer processing, Photo (PR removal)                                                              |
| Ethylene glycol                   | 107-21-1                 | CVD, Dry etching, Wafer processing, Ion implantation                                              |
| Isopropyl alcohol                 | 67-63-0                  | Washing, Cleaning solution (PM), Wafer processing, Maintenance, Chip assembly, Photo (PR solvent) |
| Methylchloro-isothiazolinone      | 26172-55-4               | Semiconductor Manufacturing                                                                       |
| Perfluorooctane sulfonic acid     | 1763-23-1                | Photomicroolithography                                                                            |
| Polyethylene polypropylene glycol | 9003-11-6                | Chip assembly                                                                                     |
| Pyrene                            | 129-00-0                 | Ultra-high purity chemicals for Spin-On-Hard mask                                                 |
| Silica, amorphous                 | 7631-86-9<br>112926-00-8 | Polycrystalline silicon and silicon dioxide materials are etched in semiconductor manufacturing   |
| Zinc chloride fume                | 7646-85-7                | Semiconductor Manufacturing                                                                       |
| 1-Methoxy-2-propyl acetate        | 108-65-6                 | Wafer processing, Chip assembly, Photo (PR solvent)                                               |
| 2-Heptanone                       | 110-43-0                 | Wafer processing, Photo (PR solvent)                                                              |
| 4-Chloro-2-methylphenol           | 1570-64-5                | Semiconductor Manufacturing                                                                       |
| Epichlorohydrin                   | 106-89-8                 | -                                                                                                 |
| Heptane                           | 142-82-5                 | Chip assembly, Mold etc.                                                                          |
| Nitrobenzene                      | 98-95-3                  | Semiconductor Manufacturing                                                                       |
| Phosphoric acid                   | 7664-38-2                | Wafer processing, Wet etching                                                                     |
| Piperazine                        | 110-85-0                 | Chip assembly, Rear Grinding                                                                      |

60 NR1I2 (Pregnane X Receptor, PXR) activation leading to hepatic steatosis

20

| Chemical Name                     | CAS No.    | Process in Semiconductor                                         |
|-----------------------------------|------------|------------------------------------------------------------------|
| 2,2',6,6'-Tetrabromobisphenol A   | 79-94-7    | Semiconductor and other electronic component manufacturing       |
| Bisphenol A                       | 80-05-7    | packaging                                                        |
| Methylchloro-isothiazolinone      | 26172-55-4 | Semiconductor Manufacturing                                      |
| Perfluorooctane sulfonic acid     | 1763-23-1  | Photomicroolithography                                           |
| Polyethylene polypropylene glycol | 9003-11-6  | Chip assembly                                                    |
| Pyrene                            | 129-00-0   | Ultra-high purity chemicals for Spin-On-Hard mask                |
| Tetrahydrofuran                   | 109-99-9   | Mold, Solder ball attachment, Chip assembly, Rear Grinding       |
| Zinc chloride fume                | 7646-85-7  | Semiconductor Manufacturing                                      |
| 1-nitronaphthalene                | 86-57-7    | Small Molecule Semiconductor Building Blocks                     |
| 2-Methoxyethanol                  | 109-86-4   | Manufacture of wafers for semiconductor manufacturing            |
| Dimethyl acetamide                | 127-19-5   | Photo (Diluent)                                                  |
| Ethyl acetate                     | 141-78-6   | Chip assembly, Chip adhesion, Mold, Solder ball attachment, etc. |
| Methyl isobutyl ketone            | 108-10-1   | Chip assembly, Mold, etc.                                        |

36 Peroxisomal Fatty Acid Beta-Oxidation Inhibition leading to Steatosis

15

| Chemical Name                   | CAS No. | Process in Semiconductor                                   |
|---------------------------------|---------|------------------------------------------------------------|
| 2,2',6,6'-Tetrabromobisphenol A | 79-94-7 | Semiconductor and other electronic component manufacturing |
| Acetaldehyde                    | 75-07-0 | Mold, Chip assembly                                        |

58 NR1I3(CAR) suppression leading to hepatic steatosis

15

| Acetic acid                     | 64-19-7                                                    | Washing, Wet etching, Wafer processing                                                                                        |
|---------------------------------|------------------------------------------------------------|-------------------------------------------------------------------------------------------------------------------------------|
| Antimony trichloride            | 10025-91-9                                                 | Semiconductor Manufacturing                                                                                                   |
| Bisphenol A                     | 80-05-7                                                    | packaging                                                                                                                     |
| 2-Heptanone                     | 110-43-0                                                   | Wafer processing, Photo (PR solvent)                                                                                          |
| Phosphoric acid                 | 7664-38-2                                                  | Wafer processing, Wet etching                                                                                                 |
| Chemical Name                   | CAS No.                                                    | Process in Semiconductor                                                                                                      |
| 2,2',6,6'-Tetrabromobisphenol A | 79-94-7                                                    | Semiconductor and other electronic component manufacturing                                                                    |
| 2-Butoxyethanol                 | 111-76-2                                                   | Overall Chip assembly                                                                                                         |
| Antimony trichloride            | 10025-91-9                                                 | Semiconductor Manufacturing                                                                                                   |
| Bisphenol A                     | 80-05-7                                                    | Packaging                                                                                                                     |
| Catechol                        | 120-80-9                                                   | Wafer processing, Photo (PR removal)                                                                                          |
| Cresol                          | o-Cresol 95-48-7<br>p-Cresol 106-44-5<br>m-Cresol 108-39-4 | Mold, Wafer processing, Chip assembly, Photo (PR solvent)                                                                     |
| Diethanolamine                  | 111-42-2                                                   | Stripper: Used to remove unnecessary photoresist layers after photo-resist patterning and development during photo processing |
| Dimethylformamide               | 68-12-2                                                    | Mold                                                                                                                          |
| Perfluorooctane sulfonic acid   | 1763-23-1                                                  | Photomicro lithography                                                                                                        |
| Phenol                          | 108-95-2                                                   | Mold, Chip assembly                                                                                                           |
| Zinc chloride fume              | 7646-85-7                                                  | Semiconductor Manufacturing                                                                                                   |

66 Modulation of Adult Leydig Cell Function Subsequent Glucocorticoid Activation in the Fetal Testis

13

| Chemical Name                   | CAS No.    | Process in Semiconductor                                   |
|---------------------------------|------------|------------------------------------------------------------|
| 2,2',6,6'-Tetrabromobisphenol A | 79-94-7    | Semiconductor and other electronic component manufacturing |
| Acetaldehyde                    | 75-07-0    | Mold, Chip assembly                                        |
| Antimony trichloride            | 10025-91-9 | Semiconductor Manufacturing                                |
| Bisphenol A                     | 80-05-7    | Packaging                                                  |
| Catechol                        | 120-80-9   | Wafer processing, Photo (PR removal)                       |
| Glycerol                        | 56-81-5    | Solder ball attachment, Chip assembly                      |
| Perfluorooctane sulfonic acid   | 1763-23-1  | Photomicro lithography                                     |
| Pyrene                          | 129-00-0   | Ultra-high purity chemicals for Spin-On-Hard mask          |
| Zinc chloride fume              | 7646-85-7  | Semiconductor Manufacturing                                |

107 Constitutive androstane receptor activation leading to hepatocellular adenomas and carcinomas in the mouse and the rat

13

| Chemical Name                   | CAS No.   | Process in Semiconductor                                   |
|---------------------------------|-----------|------------------------------------------------------------|
| 2,2',6,6'-Tetrabromobisphenol A | 79-94-7   | Semiconductor and other electronic component manufacturing |
| Acetaldehyde                    | 75-07-0   | Mold, Chip assembly                                        |
| Bisphenol A                     | 80-05-7   | Packaging                                                  |
| Catechol                        | 120-80-9  | Wafer processing, Photo (PR removal)                       |
| Perfluorooctane sulfonic acid   | 1763-23-1 | Photomicro lithography                                     |
| Pyrene                          | 129-00-0  | Ultra-high purity chemicals for Spin-On-Hard mask          |
| 1-nitronaphthalene              | 86-57-7   | Small Molecule Semiconductor Building Blocks               |
| 2-(2-Aminoethoxy)-ethanol       | 929-06-6  | Wafer processing                                           |
| Piperazine                      | 110-85-0  | Chip assembly, Rear Grinding                               |

61 NFE2L2/FXR activation leading to hepatic steatosis

12

| Chemical Name | CAS No. | Process in Semiconductor |
|---------------|---------|--------------------------|
|---------------|---------|--------------------------|

150 Aryl hydrocarbon receptor activation leading to early life stage mortality, via reduced VEGF

12

|                                 |                                                            |                                                                                                   |
|---------------------------------|------------------------------------------------------------|---------------------------------------------------------------------------------------------------|
| 2,2',6,6'-Tetrabromobisphenol A | 79-94-7                                                    | Semiconductor and other electronic component manufacturing                                        |
| Acetaldehyde                    | 75-07-0                                                    | Mold, Chip assembly                                                                               |
| Antimony trichloride            | 10025-91-9                                                 | Semiconductor Manufacturing                                                                       |
| Bisphenol A                     | 80-05-7                                                    | Packaging                                                                                         |
| Catechol                        | 120-80-9                                                   | Wafer processing, Photo (PR removal)                                                              |
| Cresol                          | o-Cresol 95-48-7<br>p-Cresol 106-44-5<br>m-Cresol 108-39-4 | Mold, Wafer processing, Chip assembly, Photo (PR solvent)                                         |
| Isopropyl alcohol               | 67-63-0                                                    | Washing, Cleaning solution (PM), Wafer processing, Maintenance, Chip assembly, Photo (PR solvent) |
| Zinc chloride fume              | 7646-85-7                                                  | Semiconductor Manufacturing                                                                       |
| 2-Heptanone                     | 110-43-0                                                   | Wafer processing, Photo (PR solvent)                                                              |

| Chemical Name                | CAS No.    | Process in Semiconductor                                                                                                      |
|------------------------------|------------|-------------------------------------------------------------------------------------------------------------------------------|
| Bisphenol A                  | 80-05-7    | Packaging                                                                                                                     |
| Catechol                     | 120-80-9   | Wafer processing, Photo (PR removal)                                                                                          |
| Dimethyl sulfoxide           | 67-68-5    | Stripper: Used to remove unnecessary photoresist layers after photo-resist patterning and development during photo processing |
| Methylchloro-isothiazolinone | 26172-55-4 | Semiconductor Manufacturing                                                                                                   |
| Pyrene                       | 129-00-0   | Ultra-high purity chemicals for Spin-On-Hard mask                                                                             |
| Zinc chloride fume           | 7646-85-7  | Semiconductor Manufacturing                                                                                                   |
| 1-Methoxy-2-propyl acetate   | 108-65-6   | Wafer processing, Chip assembly, Photo (PR solvent)                                                                           |
| 1-nitronaphthalene           | 86-57-7    | Small Molecule Semiconductor Building Blocks                                                                                  |
| 1-Nitropropane               | 108-03-2   | Semiconductor Manufacturing                                                                                                   |

153 Aromatase Inhibition leading to Ovulation Inhibition and Decreased Fertility in Female Rats

12

| Chemical Name                     | CAS No.   | Process in Semiconductor                                                                                                      |
|-----------------------------------|-----------|-------------------------------------------------------------------------------------------------------------------------------|
| 2,2',6,6'-Tetrabromobisphenol A   | 79-94-7   | Semiconductor and other electronic component manufacturing                                                                    |
| Acetaldehyde                      | 75-07-0   | Mold, Chip assembly                                                                                                           |
| Catechol                          | 120-80-9  | Wafer processing, Photo (PR removal)                                                                                          |
| Dimethyl sulfoxide                | 67-68-5   | Stripper: Used to remove unnecessary photoresist layers after photo-resist patterning and development during photo processing |
| Isopropyl alcohol                 | 67-63-0   | Washing, Cleaning solution (PM), Wafer processing, Maintenance, Chip assembly, Photo (PR solvent)                             |
| Perfluorooctane sulfonic acid     | 1763-23-1 | Photomicrolithography                                                                                                         |
| Diethylene glycol monobutyl ether | 112-34-5  | Semiconductor Manufacturing                                                                                                   |

163 PPARgamma activation leading to sarcomas in rats, mice, and hamsters

10

| Chemical Name                   | CAS No.   | Process in Semiconductor                                   |
|---------------------------------|-----------|------------------------------------------------------------|
| 2,2',6,6'-Tetrabromobisphenol A | 79-94-7   | Semiconductor and other electronic component manufacturing |
| Acetaldehyde                    | 75-07-0   | Mold, Chip assembly                                        |
| Bisphenol A                     | 80-05-7   | Packaging                                                  |
| Catechol                        | 120-80-9  | Wafer processing, Photo (PR removal)                       |
| Perfluorooctane sulfonic acid   | 1763-23-1 | Photomicrolithography                                      |
| 1-nitronaphthalene              | 86-57-7   | Small Molecule Semiconductor Building                      |

Blocks

Etc.

minor -

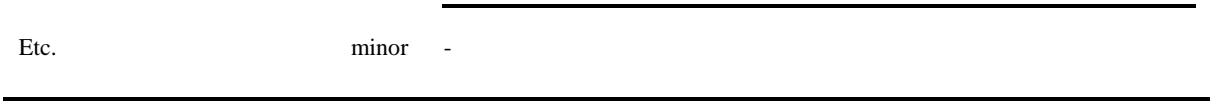

Supplement: 13273_2021_139_MOESM4_ESM.pdf [file 13273_2021_139_MOESM4_ESM.pdf]
