# Supplementary material
Source: PubMed Central journal article supplement (PMC8097676)
Supplement: 13273_2021_139_MOESM1_ESM.pdf [file 13273_2021_139_MOESM1_ESM.pdf]

| Name                                               | CAS No.                          | In ADPWiki                                  | Link to EPA Comptox                                                                                                                                                                                                                                                                                                                                | AOPWiki                                                                                                                                                                                                                                                                                                                                                                                                                                                                                                                                                                                            | MIE                                                                                                                                                                                                                                                                                                                                                                                                                                                                                                                       | KE                                                                                                                                                                                                                                                                                                                                                                                                                                        | AO                                                                                                                                                                                                                                                                                                                                                                                                                                                                                                                                                                        | AOP Graphic                                                                                                                                                                                                                                                                                                                                                                                                                                                                                                                                                                                                                                                                                                                                                                                                                                                                                                                                                                                                 | Lim Ja Un Case analysis in semiconductor workers                                                                                                                                                                                                | sAOP link                          | 19 research     |
|----------------------------------------------------|----------------------------------|---------------------------------------------|----------------------------------------------------------------------------------------------------------------------------------------------------------------------------------------------------------------------------------------------------------------------------------------------------------------------------------------------------|----------------------------------------------------------------------------------------------------------------------------------------------------------------------------------------------------------------------------------------------------------------------------------------------------------------------------------------------------------------------------------------------------------------------------------------------------------------------------------------------------------------------------------------------------------------------------------------------------|---------------------------------------------------------------------------------------------------------------------------------------------------------------------------------------------------------------------------------------------------------------------------------------------------------------------------------------------------------------------------------------------------------------------------------------------------------------------------------------------------------------------------|-------------------------------------------------------------------------------------------------------------------------------------------------------------------------------------------------------------------------------------------------------------------------------------------------------------------------------------------------------------------------------------------------------------------------------------------|---------------------------------------------------------------------------------------------------------------------------------------------------------------------------------------------------------------------------------------------------------------------------------------------------------------------------------------------------------------------------------------------------------------------------------------------------------------------------------------------------------------------------------------------------------------------------|-------------------------------------------------------------------------------------------------------------------------------------------------------------------------------------------------------------------------------------------------------------------------------------------------------------------------------------------------------------------------------------------------------------------------------------------------------------------------------------------------------------------------------------------------------------------------------------------------------------------------------------------------------------------------------------------------------------------------------------------------------------------------------------------------------------------------------------------------------------------------------------------------------------------------------------------------------------------------------------------------------------|-------------------------------------------------------------------------------------------------------------------------------------------------------------------------------------------------------------------------------------------------|------------------------------------|-----------------|
| <a href="#">E-17-3-epoxypropylcarposulfonamide</a> | 2897-60-1                        | No AOPs available                           | <a href="https://comptox.epa.gov/dashboard/dstool/results?search=TX502044639#evoc-sum">https://comptox.epa.gov/dashboard/dstool/results?search=TX502044639#evoc-sum</a>                                                                                                                                                                            |                                                                                                                                                                                                                                                                                                                                                                                                                                                                                                                                                                                                    |                                                                                                                                                                                                                                                                                                                                                                                                                                                                                                                           |                                                                                                                                                                                                                                                                                                                                                                                                                                           |                                                                                                                                                                                                                                                                                                                                                                                                                                                                                                                                                                           |                                                                                                                                                                                                                                                                                                                                                                                                                                                                                                                                                                                                                                                                                                                                                                                                                                                                                                                                                                                                             |                                                                                                                                                                                                                                                 | <a href="#">sAOP#2897-60-1.jpg</a> | Carcinogenicity |
| <a href="#">E-17-3-triethanolamine</a>             | 71-59-6                          | No AOPs available                           | <a href="https://comptox.epa.gov/dashboard/dstool/results?search=TX502014011#evoc-sum">https://comptox.epa.gov/dashboard/dstool/results?search=TX502014011#evoc-sum</a>                                                                                                                                                                            |                                                                                                                                                                                                                                                                                                                                                                                                                                                                                                                                                                                                    |                                                                                                                                                                                                                                                                                                                                                                                                                                                                                                                           |                                                                                                                                                                                                                                                                                                                                                                                                                                           |                                                                                                                                                                                                                                                                                                                                                                                                                                                                                                                                                                           |                                                                                                                                                                                                                                                                                                                                                                                                                                                                                                                                                                                                                                                                                                                                                                                                                                                                                                                                                                                                             |                                                                                                                                                                                                                                                 |                                    |                 |
| <a href="#">E-17-3-triethylamine</a>               | 156-28-2<br>156-49-3<br>158-29-3 | AOP Links: 187                              | <a href="https://comptox.epa.gov/dashboard/dstool/results?search=TX502014011#evoc-sum">https://comptox.epa.gov/dashboard/dstool/results?search=TX502014011#evoc-sum</a><br><a href="https://comptox.epa.gov/dashboard/dstool/results?search=TX502024030#evoc-sum">https://comptox.epa.gov/dashboard/dstool/results?search=TX502024030#evoc-sum</a> | Anticoagulant rodenticide inhibition of vitamin K epoxide reductase resulting coagulopathy and hemorrhage                                                                                                                                                                                                                                                                                                                                                                                                                                                                                          | <a href="https://aopwiki.org/aop/117">https://aopwiki.org/aop/117</a>                                                                                                                                                                                                                                                                                                                                                                                                                                                     | 1134 Irreversible inhibition of hepatic WDR by binding of AR at tyrosine 139. Failure to cycle vitamin K epoxide to vitamin K to form vitamin K hydroquinone<br>1138 Uncoupling of oxidative phosphorylation. Reduced ability to generate ATP<br>1169 Anticoagulant rodenticide interferes with carboxylation of Gla proteins in bone. Impairment of post-translational modification (carboxylation) of osteocalcin                       | <a href="https://aopwiki.org/events/1134">https://aopwiki.org/events/1134</a><br><a href="https://aopwiki.org/events/1138">https://aopwiki.org/events/1138</a><br><a href="https://aopwiki.org/events/1169">https://aopwiki.org/events/1169</a>                                                                                                                                                                                                                                                                                                                           | 1122 Under carboxylated clotting factors will not assemble on cell surfaces to form clot, Failure of secondary hemostasis<br>1130 Failure in vascular repair mechanisms. Unresolved blood loss (hemorrhage)<br>1131 Failure in gamma-glutamyl carboxylation of clotting factors II, VII, IX and X. Under carboxylation of clotting factors (e.g., des-gamma-carboxy prothrombin)<br>1132 Blood loss and development of anemia. Impaired oxygen delivery and nutrient delivery to tissue. Impaired carbon dioxide and waste product removal<br>1133 Hemostasis. Depletion from blood of fully functional carboxylated clotting factors<br>1135 Reduced fitness or even mortality. Acidosis, hypovolemic shock and organ dysfunction<br>1151 Osteoporosis and vascular calcification. Bone deterioration                                                                                                                                                                                                      | 1136 Impaired recruitment , Population trajectory                                                                                                                                                                                               | <a href="#">sAOP#156-59-3.jpg</a>  |                 |
| <a href="#">E-18-8-arsenic</a>                     | 723-91-1                         | No AOPs available                           |                                                                                                                                                                                                                                                                                                                                                    |                                                                                                                                                                                                                                                                                                                                                                                                                                                                                                                                                                                                    |                                                                                                                                                                                                                                                                                                                                                                                                                                                                                                                           |                                                                                                                                                                                                                                                                                                                                                                                                                                           |                                                                                                                                                                                                                                                                                                                                                                                                                                                                                                                                                                           |                                                                                                                                                                                                                                                                                                                                                                                                                                                                                                                                                                                                                                                                                                                                                                                                                                                                                                                                                                                                             |                                                                                                                                                                                                                                                 | <a href="#">sAOP#723-91-1.jpg</a>  |                 |
| <a href="#">E-18-8-methoxy-2-propenoic acid</a>    | 107-68-2                         | AOP Links: 200                              | <a href="https://comptox.epa.gov/dashboard/dstool/results?search=TX502024284#evoc-sum">https://comptox.epa.gov/dashboard/dstool/results?search=TX502024284#evoc-sum</a>                                                                                                                                                                            | Estrogen receptor activation leading to breast cancer                                                                                                                                                                                                                                                                                                                                                                                                                                                                                                                                              | <a href="https://aopwiki.org/aop/200">https://aopwiki.org/aop/200</a>                                                                                                                                                                                                                                                                                                                                                                                                                                                     | 1181 Activation, Estrogen receptor                                                                                                                                                                                                                                                                                                                                                                                                        | <a href="https://aopwiki.org/events/1181">https://aopwiki.org/events/1181</a>                                                                                                                                                                                                                                                                                                                                                                                                                                                                                             | 1182 Increase, Cell Proliferation (Epithelial Cells)<br>1183 Decreased, Apoptosis (Epithelial Cells)<br>1177 N/A, Mitochondrial dysfunction 1<br>1088 Increased, Oxidative Stress<br>1187 Increased, ER binding to DNA (classical pathway)<br>1188 Increased, ER binding to T <sub>3</sub> to DNA (non-classical pathway)<br>1189 Increased, Proliferation (Endothelial cells)<br>1190 Increased, Migration (Endothelial Cells)<br>1191 Increased, Non-genomic signaling<br>1192 Increased, Ductal Hyperplasia<br>1194 Increase, DNA damage<br>1195 modulation, Extracellular Matrix Composition<br>1196 Increased, Invasion<br>1197 Activation, Fibroblasts<br>1198 Activation, Macrophages<br>1213 Increased, Angiogenesis<br>1239 Altered, Gene Expression<br>1240 Altered, Protein Production<br>1241 Increased, Metastasis<br>1242 Increased, Second Messenger Production                                                                                                                              | 1193 N/A, Breast Cancer                                                                                                                                                                                                                         | <a href="#">sAOP#107-68-2.jpg</a>  |                 |
| <a href="#">E-18-8-methoxy-2-propenoic acid</a>    | 108-61-6                         | AOP Links: 150, 187                         | <a href="https://comptox.epa.gov/dashboard/dstool/results?search=TX50202679#evoc-sum">https://comptox.epa.gov/dashboard/dstool/results?search=TX50202679#evoc-sum</a>                                                                                                                                                                              | Aryl hydrocarbon receptor activation leading to early life stage mortality, via reduced VEGF<br>Anticoagulant rodenticide inhibition of vitamin K epoxide reductase resulting coagulopathy and hemorrhage                                                                                                                                                                                                                                                                                                                                                                                          | <a href="https://aopwiki.org/aop/150">https://aopwiki.org/aop/150</a><br><a href="https://aopwiki.org/aop/177">https://aopwiki.org/aop/177</a>                                                                                                                                                                                                                                                                                                                                                                            | 18 Activation, AHR<br>1134 Irreversible inhibition of hepatic WDR by binding of AR at tyrosine 139. Failure to cycle vitamin K epoxide to vitamin K to form vitamin K hydroquinone<br>1138 Uncoupling of oxidative phosphorylation. Reduced ability to generate ATP<br>1169 Anticoagulant rodenticide interferes with carboxylation of Gla proteins in bone. Impairment of post-translational modification (carboxylation) of osteocalcin | <a href="https://aopwiki.org/events/18">https://aopwiki.org/events/18</a><br><a href="https://aopwiki.org/events/1134">https://aopwiki.org/events/1134</a><br><a href="https://aopwiki.org/events/1138">https://aopwiki.org/events/1138</a><br><a href="https://aopwiki.org/events/1169">https://aopwiki.org/events/1169</a>                                                                                                                                                                                                                                              | 944 dimerization, AHR/ARNT<br>1122 Under carboxylated clotting factors will not assemble on cell surfaces to form clot, Failure of secondary hemostasis<br>1130 Failure in vascular repair mechanisms. Unresolved blood loss (hemorrhage)<br>1131 Failure in gamma-glutamyl carboxylation of clotting factors II, VII, IX and X. Under carboxylation of clotting factors (e.g., des-gamma-carboxy prothrombin)<br>1132 Blood loss and development of anemia. Impaired oxygen delivery and nutrient delivery to tissue. Impaired carbon dioxide and waste product removal<br>1133 Hemostasis. Depletion from blood of fully functional carboxylated clotting factors<br>1135 Reduced fitness or even mortality. Acidosis, hypovolemic shock and organ dysfunction<br>1151 Osteoporosis and vascular calcification. Bone deterioration<br>945 reduced dimerization, ARNT/AH1-alpha<br>948 reduced production, VEGF<br>110 Impairment, Endothelial network<br>317 Altered, Cardiovascular development/function | 947 Increase, Early Life Stage Mortality<br>1136 Impaired recruitment , Population trajectory                                                                                                                                                   | <a href="#">sAOP#108-61-6.jpg</a>  |                 |
| <a href="#">E-18-8-methylamine</a>                 | 66-57-7                          | AOP Links: 60, 107, 150, 163, 177, 195, 200 | <a href="https://comptox.epa.gov/dashboard/dstool/results?search=TX502020297#evoc-sum">https://comptox.epa.gov/dashboard/dstool/results?search=TX502020297#evoc-sum</a>                                                                                                                                                                            | NR12 (Pregnane X Receptor, PXR) activation leading to hepatic steatosis<br>Constitutive androstane receptor activation leading to hepatocellular adenomas and carcinomas in the mouse and the rat<br>Aryl hydrocarbon receptor activation leading to early life stage mortality, via reduced VEGF<br>PPARgamma activation leading to sarcomas in rats, mice, and hamsters<br>Cydooygenase 1 (COX1) inhibition leading to renal failure and mortality<br>5-hydroxytryptamine transporter (5-HTT) inhibition leading to population increase<br>Estrogen receptor activation leading to breast cancer | <a href="https://aopwiki.org/aop/60">https://aopwiki.org/aop/60</a><br><a href="https://aopwiki.org/aop/107">https://aopwiki.org/aop/107</a><br><a href="https://aopwiki.org/aop/150">https://aopwiki.org/aop/150</a><br><a href="https://aopwiki.org/aop/163">https://aopwiki.org/aop/163</a><br><a href="https://aopwiki.org/aop/177">https://aopwiki.org/aop/177</a><br><a href="https://aopwiki.org/aop/195">https://aopwiki.org/aop/195</a><br><a href="https://aopwiki.org/aop/200">https://aopwiki.org/aop/200</a> | 245 Activation, PXR/SXR<br>715 Activation, Constitutive androstane receptor<br>18 Activation, AHR<br>1028 Activation of specific nuclear receptors, PPAR-gamma activation<br>1103 Inhibition, Cydooygenase 1 activity<br>619 Inhibition, 5-hydroxytryptamine transporter (5-HTT, SERT)<br>1181 Activation, Estrogen receptor                                                                                                              | <a href="https://aopwiki.org/events/245">https://aopwiki.org/events/245</a><br><a href="https://aopwiki.org/events/715">https://aopwiki.org/events/715</a><br><a href="https://aopwiki.org/events/18">https://aopwiki.org/events/18</a><br><a href="https://aopwiki.org/events/1028">https://aopwiki.org/events/1028</a><br><a href="https://aopwiki.org/events/1103">https://aopwiki.org/events/1103</a><br><a href="https://aopwiki.org/events/619">https://aopwiki.org/events/619</a><br><a href="https://aopwiki.org/events/1181">https://aopwiki.org/events/1181</a> | 471 Inhibition, FoxO2 inhibition, FoxO2<br>129 Decreased, Mitochondrial fatty acid beta-oxidation<br>472 Down Regulation, CPT1A<br>474 Down Regulation, HMGCS2<br>482 Up Regulation, SCD-1<br>54 Up Regulation, CD36<br>465 Increased, FA Influx<br>477 Decreased, Ketogenesis<br>454 Increased, Triglyceride formation<br>327 Accumulation, Fatty acid<br>1214 Altered gene expression specific to CAR activation, Hepatocytes<br>716 Increase, Mitogenic cell proliferation (hepatocytes)<br>774 Increase, Proliferative foci (hepatocytes)<br>944 dimerization, AHR/ARNT<br>945 reduced dimerization, ARNT/AH1-alpha<br>948 reduced production, VEGF<br>110 Impairment, Endothelial network<br>317 Altered, Cardiovascular development/function<br>1029 Increased, adipogenesis increased, adipogenesis<br>1032 Increased, secretion of local growth factors<br>1033 Increased, proliferation of mesenchymal cells<br>1034 Increased, IGF-1 (mouse)                                                      | 469 Increased, Liver Steatosis<br>719 Increase, Adenomas/carcinomas (hepatocellular)<br>947 Increase, Early Life Stage Mortality<br>351 Increased Mortality<br>361 Decline, Population<br>1164 Increased, Population<br>1193 N/A, Breast Cancer | <a href="#">sAOP#66-57-7.jpg</a>   | Mutagenicity    |
| <a href="#">E-18-8-propylene</a>                   | 108-61-2                         | AOP Links: 150, 177                         | <a href="https://comptox.epa.gov/dashboard/dstool/results?search=TX502020808#evoc-sum">https://comptox.epa.gov/dashboard/dstool/results?search=TX502020808#evoc-sum</a>                                                                                                                                                                            | Aryl hydrocarbon receptor activation leading to early life stage mortality, via reduced VEGF<br>Cydooygenase 1 (COX1) inhibition leading to renal failure and mortality                                                                                                                                                                                                                                                                                                                                                                                                                            | <a href="https://aopwiki.org/aop/150">https://aopwiki.org/aop/150</a><br><a href="https://aopwiki.org/aop/177">https://aopwiki.org/aop/177</a>                                                                                                                                                                                                                                                                                                                                                                            | 18 Activation, AHR<br>1103 Inhibition, Cydooygenase 1 activity                                                                                                                                                                                                                                                                                                                                                                            | <a href="https://aopwiki.org/events/18">https://aopwiki.org/events/18</a><br><a href="https://aopwiki.org/events/1103">https://aopwiki.org/events/1103</a>                                                                                                                                                                                                                                                                                                                                                                                                                | 944 dimerization, AHR/ARNT<br>945 reduced dimerization, ARNT/AH1-alpha<br>948 reduced production, VEGF<br>110 Impairment, Endothelial network<br>317 Altered, Cardiovascular development/function<br>1104 Decreased, Prostaglandin F2alpha concentration, plasma<br>1105 Occurrence, renal ischemia<br>1097 Occurrence, renal proximal tubular necrosis<br>1098 Increased, blood potassium concentration<br>1106 Occurrence, cardiac arrhythmia<br>1088 Increased, Oxidative Stress<br>1096 Increased, blood ureic acid concentration<br>1102 Occurrence, topoi (urate) deposition                                                                                                                                                                                                                                                                                                                                                                                                                          | 947 Increase, Early Life Stage Mortality<br>351 Increased Mortality<br>361 Decline, Population                                                                                                                                                  | <a href="#">sAOP#108-61-2.jpg</a>  |                 |



|                                                                     |                           |                           |                                                                                                                                                                               |                                                                                                               |                                                                                                                                              |                                                                                                                                                                                                                              |                                                                                                                                                                                                                                                                                                                                                                                                           |                                                                                                                                                                                                                                                                                                                                                                                                                                                                                                                                                                                                                                                                                                                                                                                                                                                                                                                                                                                                                     |                                                                         |                                                                                                                                                                   |                                  |  |  |  |              |
|---------------------------------------------------------------------|---------------------------|---------------------------|-------------------------------------------------------------------------------------------------------------------------------------------------------------------------------|---------------------------------------------------------------------------------------------------------------|----------------------------------------------------------------------------------------------------------------------------------------------|------------------------------------------------------------------------------------------------------------------------------------------------------------------------------------------------------------------------------|-----------------------------------------------------------------------------------------------------------------------------------------------------------------------------------------------------------------------------------------------------------------------------------------------------------------------------------------------------------------------------------------------------------|---------------------------------------------------------------------------------------------------------------------------------------------------------------------------------------------------------------------------------------------------------------------------------------------------------------------------------------------------------------------------------------------------------------------------------------------------------------------------------------------------------------------------------------------------------------------------------------------------------------------------------------------------------------------------------------------------------------------------------------------------------------------------------------------------------------------------------------------------------------------------------------------------------------------------------------------------------------------------------------------------------------------|-------------------------------------------------------------------------|-------------------------------------------------------------------------------------------------------------------------------------------------------------------|----------------------------------|--|--|--|--------------|
| <a href="#">2.45.8.Tetramethylsilane</a>                            | <a href="#">220_68.4</a>  | No AOPs available         | <a href="https://comptox.epa.gov/dashboard/dsstod/r/results?search=TXS010810958#exec-sum">https://comptox.epa.gov/dashboard/dsstod/r/results?search=TXS010810958#exec-sum</a> |                                                                                                               |                                                                                                                                              |                                                                                                                                                                                                                              |                                                                                                                                                                                                                                                                                                                                                                                                           |                                                                                                                                                                                                                                                                                                                                                                                                                                                                                                                                                                                                                                                                                                                                                                                                                                                                                                                                                                                                                     |                                                                         |                                                                                                                                                                   |                                  |  |  |  |              |
| <a href="#">2.24.4.tert-butyl 4-methylphenylselenomethylsulfate</a> | <a href="#">6477122.6</a> | No AOPs available         | <a href="https://comptox.epa.gov/dashboard/dsstod/r/results?search=TXS010810958#exec-sum">https://comptox.epa.gov/dashboard/dsstod/r/results?search=TXS010810958#exec-sum</a> |                                                                                                               |                                                                                                                                              |                                                                                                                                                                                                                              |                                                                                                                                                                                                                                                                                                                                                                                                           |                                                                                                                                                                                                                                                                                                                                                                                                                                                                                                                                                                                                                                                                                                                                                                                                                                                                                                                                                                                                                     |                                                                         |                                                                                                                                                                   |                                  |  |  |  | Mutagenicity |
| <a href="#">2.46.2.2</a>                                            | <a href="#">78_91.3</a>   | No AOPs available         | <a href="https://comptox.epa.gov/dashboard/dsstod/r/results?search=TXS010810958#exec-sum">https://comptox.epa.gov/dashboard/dsstod/r/results?search=TXS010810958#exec-sum</a> |                                                                                                               |                                                                                                                                              |                                                                                                                                                                                                                              |                                                                                                                                                                                                                                                                                                                                                                                                           |                                                                                                                                                                                                                                                                                                                                                                                                                                                                                                                                                                                                                                                                                                                                                                                                                                                                                                                                                                                                                     |                                                                         |                                                                                                                                                                   |                                  |  |  |  |              |
| <a href="#">2.46.2.2</a>                                            | <a href="#">111_18.2</a>  | <b>AOP Links: 58, 200</b> | <a href="https://comptox.epa.gov/dashboard/dsstod/r/results?search=TXS010240878#exec-sum">https://comptox.epa.gov/dashboard/dsstod/r/results?search=TXS010240878#exec-sum</a> | NR113 (CAR) suppression leading to hepatic steatosis<br>Estrogen receptor activation leading to breast cancer | <a href="https://aopwiki.org/aop/58">https://aopwiki.org/aop/58</a><br><a href="https://aopwiki.org/aop/200">https://aopwiki.org/aop/200</a> | 456 Suppression, Constitutive androstane receptor, NR113<br>468 Inhibition, PPAR alpha<br>167 Activation, LXR<br>228 peroxisome proliferator activated receptor promoter demethylation<br>1181 Activation, Estrogen receptor | <a href="https://aopwiki.org/events/456">https://aopwiki.org/events/456</a><br><a href="https://aopwiki.org/events/468">https://aopwiki.org/events/468</a><br><a href="https://aopwiki.org/events/167">https://aopwiki.org/events/167</a><br><a href="https://aopwiki.org/events/228">https://aopwiki.org/events/228</a><br><a href="https://aopwiki.org/events/1181">https://aopwiki.org/events/1181</a> | 457 Activation, SREBF1<br>66 Activation, ChREBP<br>458 Increased, De Novo FA synthesis<br>454 Increased, Triglyceride formation<br>54 Up Regulation, CD36<br>462 Up Regulation, SCD-1<br>463 Up Regulation, FAS<br>451 Inhibition, Mitochondrial fatty acid beta-oxidation<br>327 Accumulation, Fatty acid<br>470 Up Regulation, Acetyl-CoA carboxylase-1 (ACC-1)<br>465 Increased, FA Influx<br>1182 Increased, Cell Proliferation (Epithelial Cells)<br>1183 Decreased, Apoptosis (Epithelial Cells)<br>177 N/A, Mitochondrial dysfunction 1<br>1088 Increased, Oxidative Stress<br>1187 Increased, ER binding to DNA (classical pathway)<br>1188 Increased, ER binding to T.F. to DNA (non-classical pathway)<br>1189 Increased, Proliferation (Endothelial cells)<br>1190 Increased, Migration (Endothelial Cells)<br>1191 Increased, Non genomic signaling<br>1192 Increased, Ductal Hyperplasia<br>1194 Increase, DNA damage<br>1195 modulation, Extracellular Matrix Composition<br>1196 Increased, Invasion | <b>459 Increased, Liver Steatosis</b><br><b>1193 N/A, Breast Cancer</b> | <a href="https://aopwiki.org/system/dragonfly/production/2016/11/29/114aop-200.jpg">https://aopwiki.org/system/dragonfly/production/2016/11/29/114aop-200.jpg</a> | <a href="#">AOP#111-76-2.jpg</a> |  |  |  |              |
| <a href="#">2.46.2.2</a>                                            | <a href="#">110_81.5</a>  | <b>AOP Links: 58</b>      | <a href="https://comptox.epa.gov/dashboard/dsstod/r/results?search=TXS010240878#exec-sum">https://comptox.epa.gov/dashboard/dsstod/r/results?search=TXS010240878#exec-sum</a> | NR113 (CAR) suppression leading to hepatic steatosis                                                          | <a href="https://aopwiki.org/aop/58">https://aopwiki.org/aop/58</a>                                                                          | 456 Suppression, Constitutive androstane receptor, NR113<br>468 Inhibition, PPAR alpha<br>167 Activation, LXR<br>228 peroxisome proliferator activated receptor promoter demethylation                                       | <a href="https://aopwiki.org/events/456">https://aopwiki.org/events/456</a><br><a href="https://aopwiki.org/events/468">https://aopwiki.org/events/468</a><br><a href="https://aopwiki.org/events/167">https://aopwiki.org/events/167</a><br><a href="https://aopwiki.org/events/228">https://aopwiki.org/events/228</a>                                                                                  | 457 Activation, SREBF1<br>66 Activation, ChREBP<br>458 Increased, De Novo FA synthesis<br>454 Increased, Triglyceride formation<br>54 Up Regulation, CD36<br>462 Up Regulation, SCD-1<br>463 Up Regulation, FAS<br>451 Inhibition, Mitochondrial fatty acid beta-oxidation<br>327 Accumulation, Fatty acid<br>470 Up Regulation, Acetyl-CoA carboxylase-1 (ACC-1)<br>465 Increased, FA Influx                                                                                                                                                                                                                                                                                                                                                                                                                                                                                                                                                                                                                       | <b>459 Increased, Liver Steatosis</b>                                   |                                                                                                                                                                   | <a href="#">AOP#110-80-5.jpg</a> |  |  |  |              |
| <a href="#">2.46.2.2</a>                                            | <a href="#">111_15.9</a>  | <b>AOP Links: 60</b>      | <a href="https://comptox.epa.gov/dashboard/dsstod/r/results?search=TXS02021978#exec-sum">https://comptox.epa.gov/dashboard/dsstod/r/results?search=TXS02021978#exec-sum</a>   | NR112 (Pregnane X Receptor, PXR) activation leading to hepatic steatosis                                      | <a href="https://aopwiki.org/aop/60">https://aopwiki.org/aop/60</a>                                                                          | 345 Activation, PXR/XR                                                                                                                                                                                                       | <a href="https://aopwiki.org/events/245">https://aopwiki.org/events/245</a>                                                                                                                                                                                                                                                                                                                               | 471 Inhibition, FoxO2 Inhibition, FoxO2<br>179 Decreased, Mitochondrial fatty acid beta-oxidation<br>472 Down Regulation, CPT1A<br>474 Down Regulation, HMGCS2<br>462 Up Regulation, SCD-1<br>54 Up Regulation, CD36<br>465 Increased, FA Influx<br>477 Decreased, Ketogenesis<br>454 Increased, Triglyceride formation<br>327 Accumulation, Fatty acid                                                                                                                                                                                                                                                                                                                                                                                                                                                                                                                                                                                                                                                             | <b>459 Increased, Liver Steatosis</b>                                   |                                                                                                                                                                   | <a href="#">AOP#111-15-9.jpg</a> |  |  |  |              |

|                                  |           |                        |                                                                                                                                                                                 |                                                                                                                                                                                                                                                         |                                                                                                                                                                                                                                    |                                                                                                                                                                                                                                                                                                                                                                                                                                                                                                                                                                                                                                  |                                                                                                                                                                                                                                                                                                                                                                                                                                                                                                                                                                                                                                                                                               |                                                                                                                                                                                                                                                                                                                                                                                                                                                                                                                                                                                                                                                                                                                                                                                                                                                                                                                                                                                                                                                                                                                                                                                                                                                                                                                                                                                                                                                                                                                                                    |                                                                                                                                     |                                                                                                                                                                        |                   |                                                                              |                                                                                                                      |  |  |
|----------------------------------|-----------|------------------------|---------------------------------------------------------------------------------------------------------------------------------------------------------------------------------|---------------------------------------------------------------------------------------------------------------------------------------------------------------------------------------------------------------------------------------------------------|------------------------------------------------------------------------------------------------------------------------------------------------------------------------------------------------------------------------------------|----------------------------------------------------------------------------------------------------------------------------------------------------------------------------------------------------------------------------------------------------------------------------------------------------------------------------------------------------------------------------------------------------------------------------------------------------------------------------------------------------------------------------------------------------------------------------------------------------------------------------------|-----------------------------------------------------------------------------------------------------------------------------------------------------------------------------------------------------------------------------------------------------------------------------------------------------------------------------------------------------------------------------------------------------------------------------------------------------------------------------------------------------------------------------------------------------------------------------------------------------------------------------------------------------------------------------------------------|----------------------------------------------------------------------------------------------------------------------------------------------------------------------------------------------------------------------------------------------------------------------------------------------------------------------------------------------------------------------------------------------------------------------------------------------------------------------------------------------------------------------------------------------------------------------------------------------------------------------------------------------------------------------------------------------------------------------------------------------------------------------------------------------------------------------------------------------------------------------------------------------------------------------------------------------------------------------------------------------------------------------------------------------------------------------------------------------------------------------------------------------------------------------------------------------------------------------------------------------------------------------------------------------------------------------------------------------------------------------------------------------------------------------------------------------------------------------------------------------------------------------------------------------------|-------------------------------------------------------------------------------------------------------------------------------------|------------------------------------------------------------------------------------------------------------------------------------------------------------------------|-------------------|------------------------------------------------------------------------------|----------------------------------------------------------------------------------------------------------------------|--|--|
| 3.Methoxy-1-phenylethanol        | 110-43-0  | AOP Links: 36, 61, 187 | <a href="https://comptox.epa.gov/dashboard/dstool/results?search=TXSD502191&amp;exec_sum">https://comptox.epa.gov/dashboard/dstool/results?search=TXSD502191&amp;exec_sum</a>   | <p>Peroxisomal Fatty Acid Beta-Oxidation inhibition Leading to Steatosis</p> <p>NFE2L2/FXR activation leading to hepatic steatosis</p> <p>Anticoagulant rodenticide inhibition of vitamin K epoxide reductase resulting coagulopathy and hemorrhage</p> | <p><a href="https://aopwiki.org/aop/76">https://aopwiki.org/aop/76</a></p> <p><a href="https://aopwiki.org/aop/63">https://aopwiki.org/aop/63</a></p> <p><a href="https://aopwiki.org/aop/187">https://aopwiki.org/aop/187</a></p> | <p>231 Decreased, PPAR-alpha activation</p> <p>232 Decreased, PPAR-beta activation</p> <p>233 Decreased, PPAR-gamma activation</p> <p>478 Activation, NR2F2</p> <p>479 Activation, NR1H4</p> <p>1134 Irreversible inhibition of hepatic VLDL by binding of AR at tyrosine 139, Failure to cycle vitamin K epoxide to vitamin K to form vitamin K hydroquinone</p> <p>1138 Uncoupling of oxidative phosphorylation, Reduced ability to generate ATP</p> <p>1169 Anticoagulant rodenticide interferes with carboxylation of Gla proteins in bone, Impairment of post-translational modification (carboxylation) of osteocalcin</p> | <p><a href="https://aopwiki.org/events/231">https://aopwiki.org/events/231</a></p> <p><a href="https://aopwiki.org/events/232">https://aopwiki.org/events/232</a></p> <p><a href="https://aopwiki.org/events/233">https://aopwiki.org/events/233</a></p> <p><a href="https://aopwiki.org/events/478">https://aopwiki.org/events/478</a></p> <p><a href="https://aopwiki.org/events/479">https://aopwiki.org/events/479</a></p> <p><a href="https://aopwiki.org/events/1134">https://aopwiki.org/events/1134</a></p> <p><a href="https://aopwiki.org/events/1138">https://aopwiki.org/events/1138</a></p> <p><a href="https://aopwiki.org/events/1169">https://aopwiki.org/events/1169</a></p> | <p>327 Accumulation, Fatty acid Accumulation, Fatty acid</p> <p>140 Decreased, HSD17B10 expression</p> <p>179 Decreased, Mitochondrial fatty acid beta-oxidation</p> <p>Decreased, Mitochondrial fatty acid beta-oxidation</p> <p>8 Decreased, 3-hydroxyacyl-CoA dehydrogenase type-2 activity</p> <p>480 Activation, SHP</p> <p>227 Activation, PPARalpha</p> <p>482 Decreased, DHAP-HSD17B4</p> <p>451 Inhibition, Mitochondrial fatty acid beta-oxidation</p> <p>483 Activation, LXR alpha</p> <p>878 Inhibition, SREBP1c</p> <p>679 Activation, MTP</p> <p>880 Increased, ApoB100</p> <p>881 Increased, Triglyceride</p> <p>458 Increased, De Novo FA synthesis</p> <p>1122 Under carboxylated clotting factors will not assemble on cell surfaces to form clot, Failure of secondary hemostasis</p> <p>1130 Failure in vascular repair mechanisms, Unresolved blood loss (hemorrhage)</p> <p>1131 Failure in gamma-glutamyl carboxylation of clotting factors II, VII, IX and X, Under carboxylation of clotting factors (e.g., des-gamma-carboxy prothrombin)</p> <p>1132 Blood loss and development of anemia, Impaired oxygen delivery and nutrient delivery to tissue, Impaired carbon dioxide and waste product removal</p> <p>1133 Hemostasis, Depletion from blood of fully functional carboxylated clotting factors</p>                                                                                                                                                                                                               | <p>459 Increased, Liver Steatosis</p> <p>459 Increased, Liver Steatosis</p> <p>1136 Impaired recruitment, Population trajectory</p> | <p><a href="https://aopwiki.org/aop/76">https://aopwiki.org/aop/76</a></p>                                                                                             |                   |                                                                              |                                                                                                                      |  |  |
| 3.Methoxy-1-phenylethanol        | 109-47-1  | No AOPs available      | <a href="https://comptox.epa.gov/dashboard/dstool/results?search=TXSD504341&amp;exec_sum">https://comptox.epa.gov/dashboard/dstool/results?search=TXSD504341&amp;exec_sum</a>   |                                                                                                                                                                                                                                                         |                                                                                                                                                                                                                                    |                                                                                                                                                                                                                                                                                                                                                                                                                                                                                                                                                                                                                                  |                                                                                                                                                                                                                                                                                                                                                                                                                                                                                                                                                                                                                                                                                               |                                                                                                                                                                                                                                                                                                                                                                                                                                                                                                                                                                                                                                                                                                                                                                                                                                                                                                                                                                                                                                                                                                                                                                                                                                                                                                                                                                                                                                                                                                                                                    |                                                                                                                                     |                                                                                                                                                                        |                   |                                                                              |                                                                                                                      |  |  |
| 3.Methoxy-1-phenylethanol        | 7067-70-4 | No AOPs available      | <a href="https://comptox.epa.gov/dashboard/dstool/results?search=TXSD504143&amp;exec_sum">https://comptox.epa.gov/dashboard/dstool/results?search=TXSD504143&amp;exec_sum</a>   |                                                                                                                                                                                                                                                         |                                                                                                                                                                                                                                    |                                                                                                                                                                                                                                                                                                                                                                                                                                                                                                                                                                                                                                  |                                                                                                                                                                                                                                                                                                                                                                                                                                                                                                                                                                                                                                                                                               |                                                                                                                                                                                                                                                                                                                                                                                                                                                                                                                                                                                                                                                                                                                                                                                                                                                                                                                                                                                                                                                                                                                                                                                                                                                                                                                                                                                                                                                                                                                                                    |                                                                                                                                     |                                                                                                                                                                        |                   |                                                                              |                                                                                                                      |  |  |
| 3-Methylbutanoic acid            | 109-88-4  | AOP Links: 60, 200     | <a href="https://comptox.epa.gov/dashboard/dstool/results?search=TXSD502418&amp;exec_sum">https://comptox.epa.gov/dashboard/dstool/results?search=TXSD502418&amp;exec_sum</a>   | <p>NR1H2 (Pregnane X Receptor, PXR) activation leading to hepatic steatosis</p> <p>Estrogen receptor activation leading to breast cancer</p>                                                                                                            | <p><a href="https://aopwiki.org/aop/60">https://aopwiki.org/aop/60</a></p> <p><a href="https://aopwiki.org/aop/200">https://aopwiki.org/aop/200</a></p>                                                                            | <p>245 Activation, PXR/DXR</p> <p>1181 Activation, Estrogen receptor</p>                                                                                                                                                                                                                                                                                                                                                                                                                                                                                                                                                         | <p><a href="https://aopwiki.org/events/245">https://aopwiki.org/events/245</a></p> <p><a href="https://aopwiki.org/events/1181">https://aopwiki.org/events/1181</a></p>                                                                                                                                                                                                                                                                                                                                                                                                                                                                                                                       | <p>471 Inhibition, FoxA2 Inhibition, FoxA2</p> <p>179 Decreased, Mitochondrial fatty acid beta-oxidation</p> <p>472 Down Regulation, CPT1A</p> <p>474 Down Regulation, HMGCS2</p> <p>462 Up Regulation, SCD-1</p> <p>54 Up Regulation, CD36</p> <p>465 Increased, FA Influx</p> <p>477 Decreased, Ketogenesis</p> <p>454 Increased, Triglyceride formation</p> <p>327 Accumulation, Fatty acid</p> <p>1182 Increase, Cell Proliferation (Epithelial Cells)</p> <p>1183 Decreased, Apoptosis (Epithelial Cells)</p> <p>177 N/A, Mitochondrial dysfunction 1</p> <p>1088 Increased, Oxidative Stress</p> <p>1187 Increased, ER binding to DNA (classical pathway)</p> <p>1188 Increased, ER binding to T.F. to DNA (non-classical pathway)</p> <p>1189 Increased, Proliferation (Endothelial cells)</p> <p>1190 Increased, Migration (Endothelial Cells)</p> <p>1191 Increased, Non-genomic signaling</p> <p>1192 Increased, Ductal Hyperplasia</p> <p>1194 Increase, DNA damage</p> <p>1195 modulation, Extracellular Matrix Composition</p> <p>1196 Increased, Invasion</p> <p>1197 Activation, Fibroblasts</p>                                                                                                                                                                                                                                                                                                                                                                                                                                    | <p>459 Increased, Liver Steatosis</p> <p>1193 N/A, Breast Cancer</p>                                                                | <p><a href="https://aopwiki.org/system/@aopwiki/production/2016/11/29/114aop-200.jpg">https://aopwiki.org/system/@aopwiki/production/2016/11/29/114aop-200.jpg</a></p> | 84년생, 여성 (다발성낭포성) | <p><a href="https://aopwiki.org/aop/60">https://aopwiki.org/aop/60</a></p>   | <p>-상성분자(가환, 분도제 - CAMP, 세정, Metal, 프롬, CVD), 식각, 감사/오파라메타</p> <p>아세트, 신나, 벤젠, 톨루엔, 크실렌, 페놀, 크레졸, 2-메톡시에탄올, 황산 등</p> |  |  |
| 3-Methylbutanoic acid            | 691-98-1  | No AOPs available      | <a href="https://comptox.epa.gov/dashboard/dstool/results?search=TXSD1802107&amp;exec_sum">https://comptox.epa.gov/dashboard/dstool/results?search=TXSD1802107&amp;exec_sum</a> |                                                                                                                                                                                                                                                         |                                                                                                                                                                                                                                    |                                                                                                                                                                                                                                                                                                                                                                                                                                                                                                                                                                                                                                  |                                                                                                                                                                                                                                                                                                                                                                                                                                                                                                                                                                                                                                                                                               |                                                                                                                                                                                                                                                                                                                                                                                                                                                                                                                                                                                                                                                                                                                                                                                                                                                                                                                                                                                                                                                                                                                                                                                                                                                                                                                                                                                                                                                                                                                                                    |                                                                                                                                     |                                                                                                                                                                        |                   |                                                                              |                                                                                                                      |  |  |
| 4-Chlorobenzophenone(1+)-hydrate | 1667-10-1 | No AOPs available      | <a href="https://comptox.epa.gov/dashboard/dstool/results?search=TXSD016815&amp;exec_sum">https://comptox.epa.gov/dashboard/dstool/results?search=TXSD016815&amp;exec_sum</a>   |                                                                                                                                                                                                                                                         |                                                                                                                                                                                                                                    |                                                                                                                                                                                                                                                                                                                                                                                                                                                                                                                                                                                                                                  |                                                                                                                                                                                                                                                                                                                                                                                                                                                                                                                                                                                                                                                                                               |                                                                                                                                                                                                                                                                                                                                                                                                                                                                                                                                                                                                                                                                                                                                                                                                                                                                                                                                                                                                                                                                                                                                                                                                                                                                                                                                                                                                                                                                                                                                                    |                                                                                                                                     |                                                                                                                                                                        |                   |                                                                              |                                                                                                                      |  |  |
| 4-Chlorobenzophenone(1+)-hydrate | 1070-84-5 | AOP Links: 187, 200    | <a href="https://comptox.epa.gov/dashboard/dstool/results?search=TXSD502191&amp;exec_sum">https://comptox.epa.gov/dashboard/dstool/results?search=TXSD502191&amp;exec_sum</a>   | <p>Anticoagulant rodenticide inhibition of vitamin K epoxide reductase resulting coagulopathy and hemorrhage</p> <p>Estrogen receptor activation leading to breast cancer</p>                                                                           | <p><a href="https://aopwiki.org/aop/187">https://aopwiki.org/aop/187</a></p> <p><a href="https://aopwiki.org/aop/200">https://aopwiki.org/aop/200</a></p>                                                                          | <p>1134 Irreversible inhibition of hepatic VLDL by binding of AR at tyrosine 139, Failure to cycle vitamin K epoxide to vitamin K to form vitamin K hydroquinone</p> <p>1138 Uncoupling of oxidative phosphorylation, Reduced ability to generate ATP</p> <p>1169 Anticoagulant rodenticide interferes with carboxylation of Gla proteins in bone, Impairment of post-translational modification (carboxylation) of osteocalcin</p> <p>1181 Activation, Estrogen receptor</p>                                                                                                                                                    | <p><a href="https://aopwiki.org/events/1134">https://aopwiki.org/events/1134</a></p> <p><a href="https://aopwiki.org/events/1138">https://aopwiki.org/events/1138</a></p> <p><a href="https://aopwiki.org/events/1169">https://aopwiki.org/events/1169</a></p> <p><a href="https://aopwiki.org/events/1181">https://aopwiki.org/events/1181</a></p>                                                                                                                                                                                                                                                                                                                                           | <p>1122 Under carboxylated clotting factors will not assemble on cell surfaces to form clot, Failure of secondary hemostasis</p> <p>1130 Failure in vascular repair mechanisms, Unresolved blood loss (hemorrhage)</p> <p>1131 Failure in gamma-glutamyl carboxylation of clotting factors II, VII, IX and X, Under carboxylation of clotting factors (e.g., des-gamma-carboxy prothrombin)</p> <p>1132 Blood loss and development of anemia, Impaired oxygen delivery and nutrient delivery to tissue, Impaired carbon dioxide and waste product removal</p> <p>1133 Hemostasis, Depletion from blood of fully functional carboxylated clotting factors</p> <p>1135 Reduced fitness or even mortality, Acidosis, hypovolemic shock and organ dysfunction</p> <p>1151 Osteoporosis and vascular calcification, Bone deterioration</p> <p>1182 Increase, Cell Proliferation (Epithelial Cells)</p> <p>1183 Decreased, Apoptosis (Epithelial Cells)</p> <p>177 N/A, Mitochondrial dysfunction 1</p> <p>1088 Increased, Oxidative Stress</p> <p>1187 Increased, ER binding to DNA (classical pathway)</p> <p>1188 Increased, ER binding to T.F. to DNA (non-classical pathway)</p> <p>1189 Increased, Proliferation (Endothelial cells)</p> <p>1190 Increased, Migration (Endothelial Cells)</p> <p>1191 Increased, Non-genomic signaling</p> <p>1192 Increased, Ductal Hyperplasia</p> <p>1194 Increase, DNA damage</p> <p>1195 modulation, Extracellular Matrix Composition</p> <p>1196 Increased, Invasion</p> <p>1197 Activation, Fibroblasts</p> | <p>1136 Impaired recruitment, Population trajectory</p> <p>1193 N/A, Breast Cancer</p>                                              | <p><a href="https://aopwiki.org/system/@aopwiki/production/2016/11/29/114aop-200.jpg">https://aopwiki.org/system/@aopwiki/production/2016/11/29/114aop-200.jpg</a></p> |                   | <p><a href="https://aopwiki.org/aop/187">https://aopwiki.org/aop/187</a></p> |                                                                                                                      |  |  |



|                                                   |            |                   |                                                                                                                                                                                   |     |                                                                                                           |                                                                                                                                                                                                                                                                                                                                                                                                                                 |                                                                                                                                                                                                                                                                                                                                                                                                                                                                                                                                                                                                                                                                                                                                                                                                                             |                                                      |                                                                                                                                                                                                                                                                                                                                                                                                                                                                                                                                                                                                       |                    |                                                                              |                                      |  |  |                                   |
|---------------------------------------------------|------------|-------------------|-----------------------------------------------------------------------------------------------------------------------------------------------------------------------------------|-----|-----------------------------------------------------------------------------------------------------------|---------------------------------------------------------------------------------------------------------------------------------------------------------------------------------------------------------------------------------------------------------------------------------------------------------------------------------------------------------------------------------------------------------------------------------|-----------------------------------------------------------------------------------------------------------------------------------------------------------------------------------------------------------------------------------------------------------------------------------------------------------------------------------------------------------------------------------------------------------------------------------------------------------------------------------------------------------------------------------------------------------------------------------------------------------------------------------------------------------------------------------------------------------------------------------------------------------------------------------------------------------------------------|------------------------------------------------------|-------------------------------------------------------------------------------------------------------------------------------------------------------------------------------------------------------------------------------------------------------------------------------------------------------------------------------------------------------------------------------------------------------------------------------------------------------------------------------------------------------------------------------------------------------------------------------------------------------|--------------------|------------------------------------------------------------------------------|--------------------------------------|--|--|-----------------------------------|
| <a href="#">4-ethyl-2-naphthol</a>                | 98-43-6    | ACP Links: 187    |                                                                                                                                                                                   | 187 | Anticoagulant rodenticide inhibition of vitamin K epoxide reductase resulting coagulopathy and hemorrhage | MIE 1134 Irreversible inhibition of hepatic VKOR by binding of AR at tyrosine 139; Failure to cycle vitamin K epoxide to vitamin K to form vitamin K hydroquinone<br>MIE 1138 Uncoupling of oxidative phosphorylation, Reduced ability to generate ATP<br>MIE 1169 Anticoagulant rodenticide interferes with carboxylation of Gα proteins in bone. Impairment of post-translational modification (carboxylation) of osteocalcin | KE 1122 Under carboxylated clotting factors will not assemble on cell surfaces to form clot. Failure of secondary hemostasis<br>KE 1130 Failure in vascular repair mechanisms, Unresolved blood loss (hemorrhage)<br>KE 1131 Failure in gamma-glutamyl carboxylation of clotting factors II, VII, IX and X. Under carboxylation of clotting factors (e.g., des-gamma-carboxy prothrombin)<br>KE 1132 Blood loss and development of anemia, Impaired oxygen delivery and nutrient delivery to tissue, impaired carbon dioxide and waste product removal<br>KE 1133 Hemostasis, Depletion from blood of fully functional carboxylated clotting factors<br>KE 1135 Reduced fitness or even mortality, Acidosis, hypovolemic shock and organ dysfunction<br>KE 1151 Osteoporosis and vascular calcification, Bone deterioration | AO 1136 Impaired recruitment , Population trajectory |                                                                                                                                                                                                                                                                                                                                                                                                                                                                                                                                                                                                       |                    |                                                                              |                                      |  |  |                                   |
| <a href="#">Aluminum</a>                          | 7429-90-5  | No AOPs available | <a href="https://comptox.epa.gov/dashboard/dstowdb/results?searchID=TXSD304972#exec_sum">https://comptox.epa.gov/dashboard/dstowdb/results?searchID=TXSD304972#exec_sum</a>       |     |                                                                                                           |                                                                                                                                                                                                                                                                                                                                                                                                                                 |                                                                                                                                                                                                                                                                                                                                                                                                                                                                                                                                                                                                                                                                                                                                                                                                                             |                                                      |                                                                                                                                                                                                                                                                                                                                                                                                                                                                                                                                                                                                       |                    |                                                                              |                                      |  |  |                                   |
| <a href="#">Aluminum chloride</a>                 | 21304-00-1 | No AOPs available | <a href="https://comptox.epa.gov/dashboard/dstowdb/results?searchID=TXSD3046272#exec_sum">https://comptox.epa.gov/dashboard/dstowdb/results?searchID=TXSD3046272#exec_sum</a>     |     |                                                                                                           |                                                                                                                                                                                                                                                                                                                                                                                                                                 |                                                                                                                                                                                                                                                                                                                                                                                                                                                                                                                                                                                                                                                                                                                                                                                                                             |                                                      |                                                                                                                                                                                                                                                                                                                                                                                                                                                                                                                                                                                                       |                    |                                                                              |                                      |  |  |                                   |
| <a href="#">Aluminum phosphate</a>                | 20859-73-8 | No AOPs available | <a href="https://comptox.epa.gov/dashboard/dstowdb/results?searchID=TXSD1023867#exec_sum">https://comptox.epa.gov/dashboard/dstowdb/results?searchID=TXSD1023867#exec_sum</a>     |     |                                                                                                           |                                                                                                                                                                                                                                                                                                                                                                                                                                 |                                                                                                                                                                                                                                                                                                                                                                                                                                                                                                                                                                                                                                                                                                                                                                                                                             |                                                      |                                                                                                                                                                                                                                                                                                                                                                                                                                                                                                                                                                                                       |                    |                                                                              |                                      |  |  |                                   |
| <a href="#">Aluminum tris(8-hydroxyquinoline)</a> | 2085-33-8  | No AOPs available |                                                                                                                                                                                   |     |                                                                                                           |                                                                                                                                                                                                                                                                                                                                                                                                                                 |                                                                                                                                                                                                                                                                                                                                                                                                                                                                                                                                                                                                                                                                                                                                                                                                                             |                                                      |                                                                                                                                                                                                                                                                                                                                                                                                                                                                                                                                                                                                       |                    |                                                                              |                                      |  |  |                                   |
| <a href="#">Anemia</a>                            | 7664-41-7  | No AOPs available | <a href="https://comptox.epa.gov/dashboard/dstowdb/results?searchID=DTXSID0023872#exec_sum">https://comptox.epa.gov/dashboard/dstowdb/results?searchID=DTXSID0023872#exec_sum</a> |     |                                                                                                           |                                                                                                                                                                                                                                                                                                                                                                                                                                 |                                                                                                                                                                                                                                                                                                                                                                                                                                                                                                                                                                                                                                                                                                                                                                                                                             |                                                      | 66 Modulation of Adult Leydig Cell Function Subsequent Glucocorticoid Activation in the Fetal Testis<br>187 Anticoagulant rodenticide inhibition of vitamin K epoxide reductase resulting coagulopathy and hemorrhage<br>200 Estrogen receptor activation leading to breast cancer<br>294 Increased reactive oxygen and nitrogen species (RONS) leading to increased risk of breast cancer<br>Key Event: 1351 Activated, NMDA receptor<br><a href="https://www.sciencedirect.com/science/article/abs/pii/S019701862000293">https://www.sciencedirect.com/science/article/abs/pii/S019701862000293</a> | 59년생, 남성 (백혈병, 사망) | - 삼정전자화학기<br>중), 반도체<br>- 일반PM 관리, 연서,<br>노무/환경업체<br>관리소장<br>- 2003.1/2012.8 | - 2013.7/2014.10<br>- 2015.8/2017.11 |  |  |                                   |
| <a href="#">Ammonium fluoride</a>                 | 12125-01-8 | No AOPs available | <a href="https://comptox.epa.gov/dashboard/dstowdb/results?searchID=TXSD0020463#exec_sum">https://comptox.epa.gov/dashboard/dstowdb/results?searchID=TXSD0020463#exec_sum</a>     |     |                                                                                                           |                                                                                                                                                                                                                                                                                                                                                                                                                                 |                                                                                                                                                                                                                                                                                                                                                                                                                                                                                                                                                                                                                                                                                                                                                                                                                             |                                                      |                                                                                                                                                                                                                                                                                                                                                                                                                                                                                                                                                                                                       |                    |                                                                              |                                      |  |  |                                   |
| <a href="#">Ammonium persulfate</a>               | 7727-54-8  | No AOPs available | <a href="https://comptox.epa.gov/dashboard/dstowdb/results?searchID=TXSD0026618#exec_sum">https://comptox.epa.gov/dashboard/dstowdb/results?searchID=TXSD0026618#exec_sum</a>     |     |                                                                                                           |                                                                                                                                                                                                                                                                                                                                                                                                                                 |                                                                                                                                                                                                                                                                                                                                                                                                                                                                                                                                                                                                                                                                                                                                                                                                                             |                                                      |                                                                                                                                                                                                                                                                                                                                                                                                                                                                                                                                                                                                       |                    |                                                                              |                                      |  |  | <a href="#">AOP#7727-54-8.pdf</a> |

|                                 |                           |                                     |                                                                                                                                                                           |                                                                                                                                                                                                                                                                                                                                                                                                                                                                                   |                                                                                                                                                                                                                                                                                                                                                                                                |                                                                                                                                                                                                                                                                                                                                                                                                                                                                                                                                                                                                                                                                                                                                                                                                                                                                                                                                                                                                                                                                                                                                                                                 |                                                                                                                                                                                                                                                                                                                                                                                                                                                                                                                                                                                                                                                                                                                                                                                                                                                                                                                                                                                                                                                                                                                                                                                                                                                                                                      |                                                                                                                                                                                                                                                                                                                                                                                                                                                                                                                                                                                                                                                                                                                                                                                                                                                                                                                                                                                                                                                                                                                                                                            |                                                                                                                                                                                                              |                                                                                                                                                                              |                                           |                                                                                 |  |  |  |  |
|---------------------------------|---------------------------|-------------------------------------|---------------------------------------------------------------------------------------------------------------------------------------------------------------------------|-----------------------------------------------------------------------------------------------------------------------------------------------------------------------------------------------------------------------------------------------------------------------------------------------------------------------------------------------------------------------------------------------------------------------------------------------------------------------------------|------------------------------------------------------------------------------------------------------------------------------------------------------------------------------------------------------------------------------------------------------------------------------------------------------------------------------------------------------------------------------------------------|---------------------------------------------------------------------------------------------------------------------------------------------------------------------------------------------------------------------------------------------------------------------------------------------------------------------------------------------------------------------------------------------------------------------------------------------------------------------------------------------------------------------------------------------------------------------------------------------------------------------------------------------------------------------------------------------------------------------------------------------------------------------------------------------------------------------------------------------------------------------------------------------------------------------------------------------------------------------------------------------------------------------------------------------------------------------------------------------------------------------------------------------------------------------------------|------------------------------------------------------------------------------------------------------------------------------------------------------------------------------------------------------------------------------------------------------------------------------------------------------------------------------------------------------------------------------------------------------------------------------------------------------------------------------------------------------------------------------------------------------------------------------------------------------------------------------------------------------------------------------------------------------------------------------------------------------------------------------------------------------------------------------------------------------------------------------------------------------------------------------------------------------------------------------------------------------------------------------------------------------------------------------------------------------------------------------------------------------------------------------------------------------------------------------------------------------------------------------------------------------|----------------------------------------------------------------------------------------------------------------------------------------------------------------------------------------------------------------------------------------------------------------------------------------------------------------------------------------------------------------------------------------------------------------------------------------------------------------------------------------------------------------------------------------------------------------------------------------------------------------------------------------------------------------------------------------------------------------------------------------------------------------------------------------------------------------------------------------------------------------------------------------------------------------------------------------------------------------------------------------------------------------------------------------------------------------------------------------------------------------------------------------------------------------------------|--------------------------------------------------------------------------------------------------------------------------------------------------------------------------------------------------------------|------------------------------------------------------------------------------------------------------------------------------------------------------------------------------|-------------------------------------------|---------------------------------------------------------------------------------|--|--|--|--|
| <a href="#">Acetone</a>         | <a href="#">1317_70-4</a> | No AOPs available                   | <a href="https://comptox.epa.gov/dashboard/dsstowb/results?search=TXSD9050432#exec_sum">https://comptox.epa.gov/dashboard/dsstowb/results?search=TXSD9050432#exec_sum</a> |                                                                                                                                                                                                                                                                                                                                                                                                                                                                                   |                                                                                                                                                                                                                                                                                                                                                                                                |                                                                                                                                                                                                                                                                                                                                                                                                                                                                                                                                                                                                                                                                                                                                                                                                                                                                                                                                                                                                                                                                                                                                                                                 |                                                                                                                                                                                                                                                                                                                                                                                                                                                                                                                                                                                                                                                                                                                                                                                                                                                                                                                                                                                                                                                                                                                                                                                                                                                                                                      |                                                                                                                                                                                                                                                                                                                                                                                                                                                                                                                                                                                                                                                                                                                                                                                                                                                                                                                                                                                                                                                                                                                                                                            |                                                                                                                                                                                                              |                                                                                                                                                                              |                                           |                                                                                 |  |  |  |  |
| <a href="#">Acetone</a>         | <a href="#">7440_36-0</a> | No AOPs available                   | <a href="https://comptox.epa.gov/dashboard/dsstowb/results?search=TXSD0904879#exec_sum">https://comptox.epa.gov/dashboard/dsstowb/results?search=TXSD0904879#exec_sum</a> |                                                                                                                                                                                                                                                                                                                                                                                                                                                                                   |                                                                                                                                                                                                                                                                                                                                                                                                |                                                                                                                                                                                                                                                                                                                                                                                                                                                                                                                                                                                                                                                                                                                                                                                                                                                                                                                                                                                                                                                                                                                                                                                 |                                                                                                                                                                                                                                                                                                                                                                                                                                                                                                                                                                                                                                                                                                                                                                                                                                                                                                                                                                                                                                                                                                                                                                                                                                                                                                      |                                                                                                                                                                                                                                                                                                                                                                                                                                                                                                                                                                                                                                                                                                                                                                                                                                                                                                                                                                                                                                                                                                                                                                            |                                                                                                                                                                                                              |                                                                                                                                                                              |                                           |                                                                                 |  |  |  |  |
| <a href="#">Acetone, 99.99%</a> | <a href="#">1005_01-4</a> | AOP Links: 36, 50, 61, 66, 187, 200 | <a href="https://comptox.epa.gov/dashboard/dsstowb/results?search=TXSD044161#exec_sum">https://comptox.epa.gov/dashboard/dsstowb/results?search=TXSD044161#exec_sum</a>   | <p>Peroxisomal Fatty Acid Beta-Oxidation Inhibition Leading to Steatosis NR113 (CAR) suppression leading to hepatic steatosis</p> <p>NF2L2/FAR activation leading to hepatic steatosis</p> <p>Modulation of Adult Leydig Cell Function Subsequent Glucocorticoid Activation in the Fetal Testis</p> <p>Anticoagulant rodenticide inhibition of vitamin K epoxide reductase resulting coagulopathy and hemorrhage</p> <p>Estrogen receptor activation leading to breast cancer</p> | <p><a href="https://aopwiki.org/aop/736">https://aopwiki.org/aop/736</a></p> <p><a href="https://aopwiki.org/aop/735">https://aopwiki.org/aop/735</a></p> <p><a href="https://aopwiki.org/aop/66">https://aopwiki.org/aop/66</a></p> <p><a href="https://aopwiki.org/aop/141">https://aopwiki.org/aop/141</a></p> <p><a href="https://aopwiki.org/aop/200">https://aopwiki.org/aop/200</a></p> | <p>231 Decreased PPAR-<math>\alpha</math> activation</p> <p>232 Decreased PPAR-<math>\beta</math> activation</p> <p>233 Increased PPAR-<math>\gamma</math> activation</p> <p>456 Suppression, Constitutive androstane receptor NR113</p> <p>468 Inhibition, PPAR<math>\alpha</math></p> <p>167 Activation, LXR</p> <p>228 Increased expression of estrogen receptor promoter methylation</p> <p>478 Activation, NR2</p> <p>479 Activation, NR1H4</p> <p>654 Decreased testosterone by fetal Leydig cells, increased corticosterone</p> <p>654 Decreased testosterone by fetal Leydig cells, activation by other glucocorticoid receptor agonists</p> <p>1134 Increased inhibition of glucocorticoid receptor binding of AR, AR<math>\alpha</math> by estrogen</p> <p>959 Altered cycle of vitamin K epoxide to vitamin K<math>\alpha</math> by vitamin K hydroquinone</p> <p>1130 Uncoupling of oxidative phosphorylation, reduced ability to generate ATP</p> <p>1169 Anticoagulant rodenticide interferes with carboxylation of Glaprotein in bone, impairment of post-translational modification, carboxylation of osteocalcin</p> <p>1181 Activation, Estrogen receptor</p> | <p><a href="https://aopwiki.org/events/231">https://aopwiki.org/events/231</a></p> <p><a href="https://aopwiki.org/events/232">https://aopwiki.org/events/232</a></p> <p><a href="https://aopwiki.org/events/233">https://aopwiki.org/events/233</a></p> <p><a href="https://aopwiki.org/events/456">https://aopwiki.org/events/456</a></p> <p><a href="https://aopwiki.org/events/468">https://aopwiki.org/events/468</a></p> <p><a href="https://aopwiki.org/events/167">https://aopwiki.org/events/167</a></p> <p><a href="https://aopwiki.org/events/228">https://aopwiki.org/events/228</a></p> <p><a href="https://aopwiki.org/events/478">https://aopwiki.org/events/478</a></p> <p><a href="https://aopwiki.org/events/479">https://aopwiki.org/events/479</a></p> <p><a href="https://aopwiki.org/events/653">https://aopwiki.org/events/653</a></p> <p><a href="https://aopwiki.org/events/654">https://aopwiki.org/events/654</a></p> <p><a href="https://aopwiki.org/events/1134">https://aopwiki.org/events/1134</a></p> <p><a href="https://aopwiki.org/events/1138">https://aopwiki.org/events/1138</a></p> <p><a href="https://aopwiki.org/events/1169">https://aopwiki.org/events/1169</a></p> <p><a href="https://aopwiki.org/events/1181">https://aopwiki.org/events/1181</a></p> | <p>327 Accumulation, Fatty acid accumulation, Fatty acid</p> <p>140 Decreased HSD17B10 expression</p> <p>1792 Decreased Mitochondrial fatty acid <math>\beta</math>-oxidation</p> <p>Decreased Mitochondrial fatty acid <math>\beta</math>-oxidation</p> <p>8 Decreased 3-hydroxyacyl-CoA dehydrogenase type 2 activity</p> <p>45 Activation, SREBP1</p> <p>46 Activation, C/EBP<math>\beta</math></p> <p>458 Increased De Novo Fatty Acid Synthesis</p> <p>454 Increased Triglyceride formation</p> <p>543 Upregulation, CD36</p> <p>463 Upregulation, SCD-1</p> <p>463 Upregulation, FAS</p> <p>45 Inhibition, Mitochondrial fatty acid <math>\beta</math>-oxidation</p> <p>327 Accumulation, Fatty acid</p> <p>470 Upregulation, Acetyl-CoA carboxylase-1 (ACC-1)</p> <p>465 Increased Fatty acid flux</p> <p>468 Activation, SREBP1</p> <p>227 Activation, PPAR<math>\alpha</math></p> <p>483 Decreased DHAP-AT</p> <p>45 Inhibition, Mitochondrial fatty acid <math>\beta</math>-oxidation</p> <p>483 Activation, LXR<math>\alpha</math></p> <p>878 Inhibition, SREBP1c</p> <p>879 Activation, MTP</p> <p>880 Increased Aquaporin</p> <p>881 Increased Fatty acid</p> | <p>459 Increased, Liver Steatosis</p> <p>505 Decreased sperm quantity / quality in the adult, Decreased fertility</p> <p>1136 Impaired recruitment, Population trajectory</p> <p>1193 N/A, Breast Cancer</p> | <p><a href="https://aopwiki.org/system/doi/aopwiki/production/2016/11/29/114aop-200.jpg">https://aopwiki.org/system/doi/aopwiki/production/2016/11/29/114aop-200.jpg</a></p> | <p><a href="#">AOPW10025_01-5.jpg</a></p> |                                                                                 |  |  |  |  |
| <a href="#">Acetone, 99.99%</a> | <a href="#">1409_64-4</a> | No AOPs available                   | <a href="https://comptox.epa.gov/dashboard/dsstowb/results?search=TXSD402388#exec_sum">https://comptox.epa.gov/dashboard/dsstowb/results?search=TXSD402388#exec_sum</a>   |                                                                                                                                                                                                                                                                                                                                                                                                                                                                                   |                                                                                                                                                                                                                                                                                                                                                                                                |                                                                                                                                                                                                                                                                                                                                                                                                                                                                                                                                                                                                                                                                                                                                                                                                                                                                                                                                                                                                                                                                                                                                                                                 |                                                                                                                                                                                                                                                                                                                                                                                                                                                                                                                                                                                                                                                                                                                                                                                                                                                                                                                                                                                                                                                                                                                                                                                                                                                                                                      |                                                                                                                                                                                                                                                                                                                                                                                                                                                                                                                                                                                                                                                                                                                                                                                                                                                                                                                                                                                                                                                                                                                                                                            |                                                                                                                                                                                                              |                                                                                                                                                                              |                                           |                                                                                 |  |  |  |  |
| <a href="#">Acetone</a>         | <a href="#">7440_37-1</a> | No AOPs available                   | <a href="https://comptox.epa.gov/dashboard/dsstowb/results?search=TXSD3052482#exec_sum">https://comptox.epa.gov/dashboard/dsstowb/results?search=TXSD3052482#exec_sum</a> |                                                                                                                                                                                                                                                                                                                                                                                                                                                                                   |                                                                                                                                                                                                                                                                                                                                                                                                |                                                                                                                                                                                                                                                                                                                                                                                                                                                                                                                                                                                                                                                                                                                                                                                                                                                                                                                                                                                                                                                                                                                                                                                 |                                                                                                                                                                                                                                                                                                                                                                                                                                                                                                                                                                                                                                                                                                                                                                                                                                                                                                                                                                                                                                                                                                                                                                                                                                                                                                      |                                                                                                                                                                                                                                                                                                                                                                                                                                                                                                                                                                                                                                                                                                                                                                                                                                                                                                                                                                                                                                                                                                                                                                            |                                                                                                                                                                                                              |                                                                                                                                                                              |                                           |                                                                                 |  |  |  |  |
| <a href="#">Acetone</a>         | <a href="#">7440_38-2</a> | No AOPs available                   | <a href="https://comptox.epa.gov/dashboard/dsstowb/results?search=TXSD402388#exec_sum">https://comptox.epa.gov/dashboard/dsstowb/results?search=TXSD402388#exec_sum</a>   |                                                                                                                                                                                                                                                                                                                                                                                                                                                                                   |                                                                                                                                                                                                                                                                                                                                                                                                |                                                                                                                                                                                                                                                                                                                                                                                                                                                                                                                                                                                                                                                                                                                                                                                                                                                                                                                                                                                                                                                                                                                                                                                 |                                                                                                                                                                                                                                                                                                                                                                                                                                                                                                                                                                                                                                                                                                                                                                                                                                                                                                                                                                                                                                                                                                                                                                                                                                                                                                      |                                                                                                                                                                                                                                                                                                                                                                                                                                                                                                                                                                                                                                                                                                                                                                                                                                                                                                                                                                                                                                                                                                                                                                            |                                                                                                                                                                                                              |                                                                                                                                                                              |                                           |                                                                                 |  |  |  |  |
| <a href="#">Acetone, 99.99%</a> | <a href="#">7294_36-1</a> | No AOPs available                   | <a href="https://comptox.epa.gov/dashboard/dsstowb/results?search=TXSD402388#exec_sum">https://comptox.epa.gov/dashboard/dsstowb/results?search=TXSD402388#exec_sum</a>   |                                                                                                                                                                                                                                                                                                                                                                                                                                                                                   |                                                                                                                                                                                                                                                                                                                                                                                                |                                                                                                                                                                                                                                                                                                                                                                                                                                                                                                                                                                                                                                                                                                                                                                                                                                                                                                                                                                                                                                                                                                                                                                                 |                                                                                                                                                                                                                                                                                                                                                                                                                                                                                                                                                                                                                                                                                                                                                                                                                                                                                                                                                                                                                                                                                                                                                                                                                                                                                                      |                                                                                                                                                                                                                                                                                                                                                                                                                                                                                                                                                                                                                                                                                                                                                                                                                                                                                                                                                                                                                                                                                                                                                                            |                                                                                                                                                                                                              |                                                                                                                                                                              |                                           |                                                                                 |  |  |  |  |
| <a href="#">Acetone, 99.99%</a> | <a href="#">1327_53-1</a> | AOP Links: 187, 200                 | <a href="https://comptox.epa.gov/dashboard/dsstowb/results?search=TXSD0020103#exec_sum">https://comptox.epa.gov/dashboard/dsstowb/results?search=TXSD0020103#exec_sum</a> | <p>Anticoagulant rodenticide inhibition of vitamin K epoxide reductase resulting coagulopathy and hemorrhage</p> <p>Estrogen receptor activation leading to breast cancer</p>                                                                                                                                                                                                                                                                                                     | <p><a href="https://aopwiki.org/aop/187">https://aopwiki.org/aop/187</a></p> <p><a href="https://aopwiki.org/aop/200">https://aopwiki.org/aop/200</a></p>                                                                                                                                                                                                                                      | <p>1124 Increased inhibition of hepatic Wnt/WntR by binding of AR at lysine 126</p> <p>1138 Uncoupling of oxidative phosphorylation, reduced ability to generate ATP</p> <p>1169 Anticoagulant rodenticide interferes with carboxylation of Glaprotein in bone, impairment of post-translational modification</p>                                                                                                                                                                                                                                                                                                                                                                                                                                                                                                                                                                                                                                                                                                                                                                                                                                                               | <p><a href="https://aopwiki.org/events/1134">https://aopwiki.org/events/1134</a></p> <p><a href="https://aopwiki.org/events/1138">https://aopwiki.org/events/1138</a></p> <p><a href="https://aopwiki.org/events/1169">https://aopwiki.org/events/1169</a></p> <p><a href="https://aopwiki.org/events/1181">https://aopwiki.org/events/1181</a></p>                                                                                                                                                                                                                                                                                                                                                                                                                                                                                                                                                                                                                                                                                                                                                                                                                                                                                                                                                  | <p>1122 Under carboxylated clotting factors will not assemble on cell surfaces to form clot, failure of secondary hemostasis</p> <p>1130 Failure in vascular repair mechanisms, Unresolved blood loss (hemorrhage)</p> <p>1131 Failure in gamma-glutamyl carboxylation of clotting factors II, VII, IX and X. Under carboxylation of clotting factors (e.g., des-gamma-carboxy prothrombin)</p> <p>1132 Blood loss and development of anemia, impaired oxygen delivery and nutrient delivery to tissue, impaired carbon dioxide and waste product removal</p> <p>1133 Impaired recruitment, Population trajectory</p>                                                                                                                                                                                                                                                                                                                                                                                                                                                                                                                                                      | <p>1136 Impaired recruitment, Population trajectory</p> <p>1193 N/A, Breast Cancer</p>                                                                                                                       | <p><a href="https://aopwiki.org/system/doi/aopwiki/production/2016/11/29/114aop-200.jpg">https://aopwiki.org/system/doi/aopwiki/production/2016/11/29/114aop-200.jpg</a></p> | <p><a href="#">AOPW127_53_3.jpg</a></p>   | <p>- 상생전자(화성), 반도체<br/>- 플린/엔지니어<br/>- 2011.11/2013.11<br/>- 2003.11/2009.3</p> |  |  |  |  |















|                                                    |           |                         |                                                                                                                                                                                 |                                                                                                                                                                                                                                                    |                                                                                                                                                |                                                                                                                                                                                                                                                                                                           |                                                                                                                                                                                                                                                                                                                                                                                                           |                                                                                                                                                                                                                                                                                                                                                                                                                                                                                                                                                                                                                                                                                                                                                                                                                                                                                                                                                                                                                                                                                                                                                                                                                    |                                                                                                                    |                                                                                                                                                                 |  |                                 |  |                                 |                                |
|----------------------------------------------------|-----------|-------------------------|---------------------------------------------------------------------------------------------------------------------------------------------------------------------------------|----------------------------------------------------------------------------------------------------------------------------------------------------------------------------------------------------------------------------------------------------|------------------------------------------------------------------------------------------------------------------------------------------------|-----------------------------------------------------------------------------------------------------------------------------------------------------------------------------------------------------------------------------------------------------------------------------------------------------------|-----------------------------------------------------------------------------------------------------------------------------------------------------------------------------------------------------------------------------------------------------------------------------------------------------------------------------------------------------------------------------------------------------------|--------------------------------------------------------------------------------------------------------------------------------------------------------------------------------------------------------------------------------------------------------------------------------------------------------------------------------------------------------------------------------------------------------------------------------------------------------------------------------------------------------------------------------------------------------------------------------------------------------------------------------------------------------------------------------------------------------------------------------------------------------------------------------------------------------------------------------------------------------------------------------------------------------------------------------------------------------------------------------------------------------------------------------------------------------------------------------------------------------------------------------------------------------------------------------------------------------------------|--------------------------------------------------------------------------------------------------------------------|-----------------------------------------------------------------------------------------------------------------------------------------------------------------|--|---------------------------------|--|---------------------------------|--------------------------------|
| <a href="#">Diazepam</a>                           | 1107-46.2 | No AOPs available       | <a href="https://comptox.epa.gov/dashboard/dashboard/results?search=TXSD024339#exec-sum">https://comptox.epa.gov/dashboard/dashboard/results?search=TXSD024339#exec-sum</a>     |                                                                                                                                                                                                                                                    |                                                                                                                                                |                                                                                                                                                                                                                                                                                                           |                                                                                                                                                                                                                                                                                                                                                                                                           |                                                                                                                                                                                                                                                                                                                                                                                                                                                                                                                                                                                                                                                                                                                                                                                                                                                                                                                                                                                                                                                                                                                                                                                                                    |                                                                                                                    |                                                                                                                                                                 |  |                                 |  |                                 |                                |
| <a href="#">Diazepam</a>                           | 142-26.1  | No AOPs available<br>95 | <a href="https://comptox.epa.gov/dashboard/dashboard/results?search=TXSD1002007#exec-sum">https://comptox.epa.gov/dashboard/dashboard/results?search=TXSD1002007#exec-sum</a>   | 95 Ether-a-go-go (ERG) voltage-gated potassium channel inhibition leading to reduced survival                                                                                                                                                      |                                                                                                                                                | ME 593 Inhibition, Ether-a-go-go (ERG) voltage-gated potassium channel                                                                                                                                                                                                                                    |                                                                                                                                                                                                                                                                                                                                                                                                           | KE 585 Decreased, Sodium conductance 1<br>KE 586 Reduced, swimming speed<br>KE 587 Reduced, feeding 1<br>KE 588 Increased, predation                                                                                                                                                                                                                                                                                                                                                                                                                                                                                                                                                                                                                                                                                                                                                                                                                                                                                                                                                                                                                                                                               | AO 592 Reduced, survival                                                                                           |                                                                                                                                                                 |  |                                 |  |                                 |                                |
| <a href="#">Diazepam</a>                           | 75-09.2   | No AOPs available       | <a href="https://comptox.epa.gov/dashboard/dashboard/results?search=TXSD0002068#exec-sum">https://comptox.epa.gov/dashboard/dashboard/results?search=TXSD0002068#exec-sum</a>   |                                                                                                                                                                                                                                                    |                                                                                                                                                |                                                                                                                                                                                                                                                                                                           |                                                                                                                                                                                                                                                                                                                                                                                                           |                                                                                                                                                                                                                                                                                                                                                                                                                                                                                                                                                                                                                                                                                                                                                                                                                                                                                                                                                                                                                                                                                                                                                                                                                    |                                                                                                                    |                                                                                                                                                                 |  |                                 |  |                                 | <a href="#">AO 75-09-2.pdf</a> |
| <a href="#">Diazepam</a>                           | 410-36.0  | No AOPs available       | <a href="https://comptox.epa.gov/dashboard/dashboard/results?search=TXSD1054082#exec-sum">https://comptox.epa.gov/dashboard/dashboard/results?search=TXSD1054082#exec-sum</a>   |                                                                                                                                                                                                                                                    |                                                                                                                                                |                                                                                                                                                                                                                                                                                                           |                                                                                                                                                                                                                                                                                                                                                                                                           |                                                                                                                                                                                                                                                                                                                                                                                                                                                                                                                                                                                                                                                                                                                                                                                                                                                                                                                                                                                                                                                                                                                                                                                                                    |                                                                                                                    |                                                                                                                                                                 |  |                                 |  |                                 |                                |
| <a href="#">Diazepam</a>                           | 111-16.2  | AOP Links: 58, 200      | <a href="https://comptox.epa.gov/dashboard/dashboard/results?search=TXSD0302193#exec-sum">https://comptox.epa.gov/dashboard/dashboard/results?search=TXSD0302193#exec-sum</a>   | NR13 (CAR) suppression leading to hepatic steatosis<br>Estrogen receptor activation leading to breast cancer                                                                                                                                       | <a href="https://aopwiki.org/aop/58">https://aopwiki.org/aop/58</a><br><a href="https://aopwiki.org/aop/200">https://aopwiki.org/aop/200</a>   | 456 Suppression, Constitutive androstane receptor, NR13<br>468 Inhibition, PPAR alpha<br>167 Activation, LXR<br>228 peroxisome proliferator activated receptor promoter demethylation<br>1181 Activation, Estrogen receptor                                                                               | <a href="https://aopwiki.org/events/456">https://aopwiki.org/events/456</a><br><a href="https://aopwiki.org/events/468">https://aopwiki.org/events/468</a><br><a href="https://aopwiki.org/events/167">https://aopwiki.org/events/167</a><br><a href="https://aopwiki.org/events/228">https://aopwiki.org/events/228</a><br><a href="https://aopwiki.org/events/1181">https://aopwiki.org/events/1181</a> | 457 Activation, SREBF1<br>66 Activation, CREBP<br>458 Increased, De Novo FA synthesis<br>454 Increased, Triglyceride formation<br>54 Lip Regulation, CD36<br>462 Lip Regulation, SCD-1<br>463 Lip Regulation, FAS<br>451 Inhibition, Mitochondrial fatty acid beta-oxidation<br>327 Accumulation, Fatty acid<br>470 Lip Regulation, Acetyl-CoA carboxylase-1 (ACC-1)<br>465 Increased, FA Influx<br>1182 Increase, Cell Proliferation (Epithelial Cells)<br>1183 Decreased, Apoptosis (Epithelial Cells)<br>177 N/A, Mitochondrial dysfunction 1<br>1088 Increased, Oxidative Stress<br>1187 Increased, ER binding to DNA (classical pathway)<br>1188 Increased, ER binding to F. to DNA (non-classical pathway)<br>1189 Increased, Proliferation (Endothelial cells)                                                                                                                                                                                                                                                                                                                                                                                                                                              | 459 Increased, Liver Steatosis<br>1193 N/A, Breast Cancer                                                          | <a href="https://aopwiki.org/system/@aopwiki/production/2016/11/29/116aop-200.pdf">https://aopwiki.org/system/@aopwiki/production/2016/11/29/116aop-200.pdf</a> |  | <a href="#">AO 111-16-2.pdf</a> |  |                                 |                                |
| <a href="#">Diazepam</a>                           | 95-30.1   | No AOPs available       | <a href="https://comptox.epa.gov/dashboard/dashboard/results?search=TXSD004447#exec-sum">https://comptox.epa.gov/dashboard/dashboard/results?search=TXSD004447#exec-sum</a>     |                                                                                                                                                                                                                                                    |                                                                                                                                                |                                                                                                                                                                                                                                                                                                           |                                                                                                                                                                                                                                                                                                                                                                                                           |                                                                                                                                                                                                                                                                                                                                                                                                                                                                                                                                                                                                                                                                                                                                                                                                                                                                                                                                                                                                                                                                                                                                                                                                                    |                                                                                                                    |                                                                                                                                                                 |  |                                 |  |                                 | <a href="#">AO 95-30-1.pdf</a> |
| <a href="#">Diethylone glycol dimethyl ether</a>   | 111-36.4  | No AOPs available<br>95 | <a href="https://comptox.epa.gov/dashboard/dashboard/results?search=TXSD1024627#exec-sum">https://comptox.epa.gov/dashboard/dashboard/results?search=TXSD1024627#exec-sum</a>   | 95 Ether-a-go-go (ERG) voltage-gated potassium channel inhibition leading to reduced survival                                                                                                                                                      |                                                                                                                                                | ME 593 Inhibition, Ether-a-go-go (ERG) voltage-gated potassium channel<br>NVS_ENZ_AMAOP<br>BSX_HDFCGF_CollagenIII_down                                                                                                                                                                                    |                                                                                                                                                                                                                                                                                                                                                                                                           | KE 585 Decreased, Sodium conductance 1<br>KE 586 Reduced, swimming speed<br>KE 587 Reduced, feeding 1<br>KE 588 Increased, predation<br>COL3A1                                                                                                                                                                                                                                                                                                                                                                                                                                                                                                                                                                                                                                                                                                                                                                                                                                                                                                                                                                                                                                                                     | AO 592 Reduced, survival                                                                                           |                                                                                                                                                                 |  |                                 |  | <a href="#">AO 111-36-4.pdf</a> |                                |
| <a href="#">Diethylone glycol monomethyl ether</a> | 112-34.5  | AOP Links: 95, 153, 200 | <a href="https://comptox.epa.gov/dashboard/dashboard/results?search=TXSD08021519#exec-sum">https://comptox.epa.gov/dashboard/dashboard/results?search=TXSD08021519#exec-sum</a> | Ether-a-go-go (ERG) voltage-gated potassium channel inhibition leading to reduced survival<br>Aromatase inhibition leading to Ovulation Inhibition and Decreased Fertility in Female Rats<br>Estrogen receptor activation leading to breast cancer | <a href="https://aopwiki.org/aop/153">https://aopwiki.org/aop/153</a><br><a href="https://aopwiki.org/aop/200">https://aopwiki.org/aop/200</a> | ME 593 Inhibition, Ether-a-go-go (ERG) voltage-gated potassium channel<br>964 Inhibition of Aromatase Enzyme, Chemical exposure during critical window of estrous cycle between diestrus 2 and proestrus inhibits aromatase conversion of testosterone to estradiol<br>1181 Activation, Estrogen receptor | <a href="https://aopwiki.org/events/964">https://aopwiki.org/events/964</a><br><a href="https://aopwiki.org/events/1181">https://aopwiki.org/events/1181</a>                                                                                                                                                                                                                                              | 963 Inhibition, Ether-a-go-go (ERG) voltage-gated potassium channel<br>965 reduction in ovarian granulosa cells synthesis of estradiol, Reduced steroidogenic production of estradiol in granulosa cells<br>966 Reduced Estradiol in Circulation, Reduced steroidogenic production of estradiol in granulosa cells leading to decreased estradiol in circulation<br>967 Decreased positive estrogenic feedback on hypothalamus, Reduced estradiol in circulation decreases estrogen concentration at hypothalamus<br>968 Decreased Kisspeptin release from neurons in AVPV, Decreased hypothalamic estrogen reduces kisspeptinergic neuron response<br>969 Decreased GnRH Release, Decreased Kisspeptin stimulation of GnRH neurons<br>970 Decreased LH release from Anterior Pituitary, Decreased GnRH stimulation of Anterior Pituitary Gonadotrophs<br>971 Ovulation of oocytes Reduced, Delayed, or Blocked, Decrease or delay in LH surge required for ovulation<br>1182 Increase, Cell Proliferation (Epithelial Cells)<br>1183 Decreased, Apoptosis (Epithelial Cells)<br>177 N/A, Mitochondrial dysfunction 1<br>1088 Increased, Oxidative Stress<br>1187 Increased, ER binding to DNA (classical pathway) | AO 592 Reduced, survival<br>972 Decreased fertility, Reduced number of oocytes ovulated<br>1193 N/A, Breast Cancer | <a href="https://aopwiki.org/system/@aopwiki/production/2016/11/29/116aop-200.pdf">https://aopwiki.org/system/@aopwiki/production/2016/11/29/116aop-200.pdf</a> |  | <a href="#">AO 112-34-5.pdf</a> |  |                                 |                                |



|                           |                           |                                                                                                                                                                                                                                            |                                                                                                                                                                                 |                                                                                                                                                                    |                                                                                                                                                    |                                                                                                                                                                                                                                                                                                                                                                                                                                                            |                                                                                                                                                                                                                                                                                                                                  |                                                                                                                                                                                                                                                                                                                                                                                                                                                                                                                                                                                                                                                                                                                                                                                                                                                                                                                |                                                                                           |                                                                                                                                                               |               |                                  |                                             |                                  |  |                                     |                                                                                                                                                                                                                                                                                                                                                                                                                                                                                   |                                                              |                                             |                                  |
|---------------------------|---------------------------|--------------------------------------------------------------------------------------------------------------------------------------------------------------------------------------------------------------------------------------------|---------------------------------------------------------------------------------------------------------------------------------------------------------------------------------|--------------------------------------------------------------------------------------------------------------------------------------------------------------------|----------------------------------------------------------------------------------------------------------------------------------------------------|------------------------------------------------------------------------------------------------------------------------------------------------------------------------------------------------------------------------------------------------------------------------------------------------------------------------------------------------------------------------------------------------------------------------------------------------------------|----------------------------------------------------------------------------------------------------------------------------------------------------------------------------------------------------------------------------------------------------------------------------------------------------------------------------------|----------------------------------------------------------------------------------------------------------------------------------------------------------------------------------------------------------------------------------------------------------------------------------------------------------------------------------------------------------------------------------------------------------------------------------------------------------------------------------------------------------------------------------------------------------------------------------------------------------------------------------------------------------------------------------------------------------------------------------------------------------------------------------------------------------------------------------------------------------------------------------------------------------------|-------------------------------------------------------------------------------------------|---------------------------------------------------------------------------------------------------------------------------------------------------------------|---------------|----------------------------------|---------------------------------------------|----------------------------------|--|-------------------------------------|-----------------------------------------------------------------------------------------------------------------------------------------------------------------------------------------------------------------------------------------------------------------------------------------------------------------------------------------------------------------------------------------------------------------------------------------------------------------------------------|--------------------------------------------------------------|---------------------------------------------|----------------------------------|
| <a href="#">Chaperone</a> | <a href="#">66-17-3</a>   | <a href="https://aopwiki.org/stressors?utf8=%26%3Bsearch=Ethyl+acetate&amp;commit=Search&amp;find_by_id=">https://aopwiki.org/stressors?utf8=%26%3Bsearch=Ethyl+acetate&amp;commit=Search&amp;find_by_id=</a>                              | <a href="https://comptox.epa.gov/dashboard/dashboard/results?search=TXSD902058#exec_sum">https://comptox.epa.gov/dashboard/dashboard/results?search=TXSD902058#exec_sum</a>     | AOP 260 CYP2E1 activation and formation of protein adducts leading to neurodegeneration                                                                            |                                                                                                                                                    | ME 1508 CYP2E1 Activation<br>ME 1509 Protein Adduct Formation                                                                                                                                                                                                                                                                                                                                                                                              |                                                                                                                                                                                                                                                                                                                                  | KE 1510 Oxidative Stress in Brain<br>KE 1511 Lipid Peroxidation<br>KE 1512 Unfolded Protein Response<br>KE 1513 General Apoptosis                                                                                                                                                                                                                                                                                                                                                                                                                                                                                                                                                                                                                                                                                                                                                                              | AO 1514 Neurodegeneration                                                                 |                                                                                                                                                               |               |                                  |                                             |                                  |  |                                     |                                                                                                                                                                                                                                                                                                                                                                                                                                                                                   |                                                              |                                             |                                  |
| <a href="#">Chaperone</a> | <a href="#">141-4-3</a>   | No AOPs available                                                                                                                                                                                                                          | <a href="https://comptox.epa.gov/dashboard/dashboard/results?search=TXSD6072000#exec_sum">https://comptox.epa.gov/dashboard/dashboard/results?search=TXSD6072000#exec_sum</a>   |                                                                                                                                                                    |                                                                                                                                                    |                                                                                                                                                                                                                                                                                                                                                                                                                                                            |                                                                                                                                                                                                                                                                                                                                  |                                                                                                                                                                                                                                                                                                                                                                                                                                                                                                                                                                                                                                                                                                                                                                                                                                                                                                                |                                                                                           |                                                                                                                                                               |               |                                  |                                             |                                  |  | <a href="#">AOPW141-43-3.jpg</a>    |                                                                                                                                                                                                                                                                                                                                                                                                                                                                                   |                                                              |                                             |                                  |
| <a href="#">Chaperone</a> | <a href="#">141-78-6</a>  | <b>AOP Links: 60, 200</b><br><a href="https://aopwiki.org/stressors?utf8=%26%3Bsearch=Ethyl+acetate&amp;commit=Search&amp;find_by_id=">https://aopwiki.org/stressors?utf8=%26%3Bsearch=Ethyl+acetate&amp;commit=Search&amp;find_by_id=</a> | <a href="https://comptox.epa.gov/dashboard/dashboard/results?search=TXSD102001#exec_sum">https://comptox.epa.gov/dashboard/dashboard/results?search=TXSD102001#exec_sum</a>     | NR12 (Pregnane X Receptor, PXR) activation leading to hepatic steatosis<br>Estrogen receptor activation leading to breast cancer                                   | <a href="https://aopwiki.org/aops/60">https://aopwiki.org/aops/60</a><br><a href="https://aopwiki.org/aops/200">https://aopwiki.org/aops/200</a>   | 245 Activation, PXR/SXR<br>1181 Activation, Estrogen receptor                                                                                                                                                                                                                                                                                                                                                                                              | <a href="https://aopwiki.org/events/245">https://aopwiki.org/events/245</a><br><a href="https://aopwiki.org/events/1181">https://aopwiki.org/events/1181</a>                                                                                                                                                                     | 71 Inhibition, Foxk2 Inhibition, Foxk2<br>179 Decreased, Mitochondrial fatty acid beta-oxidation<br>472 Down Regulation, CPT1A<br>474 Down Regulation, HMGCS2<br>462 Up Regulation, SCD-1<br>54 Up Regulation, CD36<br>465 Increased, FA Influx<br>477 Decreased, Ketogenesis<br>454 Increased, Triglyceride formation<br>327 Accumulation, Fatty acid<br>1182 Increase, Cell Proliferation (Epithelial Cells)<br>1183 Decreased, Apoptosis (Epithelial Cells)<br>1177 N/A, Mitochondrial dysfunction 1<br>1088 Increased, Oxidative Stress<br>1187 Increased ER binding to DNA (classical pathway)<br>1189 Increased ER binding to T.F. to DNA (non-classical pathway)<br>1189 Increased, Proliferation (Endothelial cells)<br>1190 Increased, Migration (Endothelial Cells)<br>1191 Increased, Non-genomic signaling<br>1192 Increased, Dural Hypertension                                                   | <b>459 Increased, Liver Steatosis</b><br><b>1193 N/A, Breast Cancer</b>                   | <a href="https://aopwiki.org/system/uploads/production/2016/11/29/11dApp-200.jpg">https://aopwiki.org/system/uploads/production/2016/11/29/11dApp-200.jpg</a> |               |                                  |                                             | <a href="#">AOPW141-78-6.jpg</a> |  |                                     |                                                                                                                                                                                                                                                                                                                                                                                                                                                                                   |                                                              |                                             |                                  |
| <a href="#">Chaperone</a> | <a href="#">100-41-4</a>  | No AOPs available                                                                                                                                                                                                                          | <a href="https://comptox.epa.gov/dashboard/dashboard/results?search=TXSD302056#exec_sum">https://comptox.epa.gov/dashboard/dashboard/results?search=TXSD302056#exec_sum</a>     |                                                                                                                                                                    |                                                                                                                                                    |                                                                                                                                                                                                                                                                                                                                                                                                                                                            |                                                                                                                                                                                                                                                                                                                                  |                                                                                                                                                                                                                                                                                                                                                                                                                                                                                                                                                                                                                                                                                                                                                                                                                                                                                                                |                                                                                           |                                                                                                                                                               |               |                                  |                                             |                                  |  |                                     |                                                                                                                                                                                                                                                                                                                                                                                                                                                                                   |                                                              |                                             |                                  |
| <a href="#">Chaperone</a> | <a href="#">97-64-3</a>   | No AOPs available                                                                                                                                                                                                                          | <a href="https://comptox.epa.gov/dashboard/dashboard/results?search=TXSD602127#exec_sum">https://comptox.epa.gov/dashboard/dashboard/results?search=TXSD602127#exec_sum</a>     |                                                                                                                                                                    |                                                                                                                                                    |                                                                                                                                                                                                                                                                                                                                                                                                                                                            |                                                                                                                                                                                                                                                                                                                                  |                                                                                                                                                                                                                                                                                                                                                                                                                                                                                                                                                                                                                                                                                                                                                                                                                                                                                                                |                                                                                           |                                                                                                                                                               |               |                                  |                                             |                                  |  | <a href="#">AOPW141-97-64-3.jpg</a> |                                                                                                                                                                                                                                                                                                                                                                                                                                                                                   |                                                              |                                             |                                  |
| <a href="#">Chaperone</a> | <a href="#">1189-08-2</a> | No AOPs available                                                                                                                                                                                                                          | <a href="https://comptox.epa.gov/dashboard/dashboard/results?search=TXSD402731#exec_sum">https://comptox.epa.gov/dashboard/dashboard/results?search=TXSD402731#exec_sum</a>     |                                                                                                                                                                    |                                                                                                                                                    |                                                                                                                                                                                                                                                                                                                                                                                                                                                            |                                                                                                                                                                                                                                                                                                                                  |                                                                                                                                                                                                                                                                                                                                                                                                                                                                                                                                                                                                                                                                                                                                                                                                                                                                                                                |                                                                                           |                                                                                                                                                               |               |                                  |                                             |                                  |  |                                     |                                                                                                                                                                                                                                                                                                                                                                                                                                                                                   |                                                              |                                             |                                  |
| <a href="#">Chaperone</a> | <a href="#">264-26-9</a>  | No AOPs available                                                                                                                                                                                                                          | <a href="https://comptox.epa.gov/dashboard/dashboard/results?search=TXSD002739#exec_sum">https://comptox.epa.gov/dashboard/dashboard/results?search=TXSD002739#exec_sum</a>     |                                                                                                                                                                    |                                                                                                                                                    |                                                                                                                                                                                                                                                                                                                                                                                                                                                            |                                                                                                                                                                                                                                                                                                                                  |                                                                                                                                                                                                                                                                                                                                                                                                                                                                                                                                                                                                                                                                                                                                                                                                                                                                                                                |                                                                                           |                                                                                                                                                               |               |                                  |                                             |                                  |  |                                     |                                                                                                                                                                                                                                                                                                                                                                                                                                                                                   |                                                              |                                             |                                  |
| <a href="#">Chaperone</a> | <a href="#">74-85-1</a>   | No AOPs available                                                                                                                                                                                                                          | <a href="https://comptox.epa.gov/dashboard/dashboard/results?search=TXSD030437#exec_sum">https://comptox.epa.gov/dashboard/dashboard/results?search=TXSD030437#exec_sum</a>     |                                                                                                                                                                    |                                                                                                                                                    |                                                                                                                                                                                                                                                                                                                                                                                                                                                            |                                                                                                                                                                                                                                                                                                                                  |                                                                                                                                                                                                                                                                                                                                                                                                                                                                                                                                                                                                                                                                                                                                                                                                                                                                                                                |                                                                                           |                                                                                                                                                               |               |                                  |                                             |                                  |  |                                     |                                                                                                                                                                                                                                                                                                                                                                                                                                                                                   |                                                              |                                             |                                  |
| <a href="#">Chaperone</a> | <a href="#">169-21-1</a>  | <b>AOP Links: 187, 200</b>                                                                                                                                                                                                                 | <a href="https://comptox.epa.gov/dashboard/dashboard/results?search=DTXSD2000597#exec_sum">https://comptox.epa.gov/dashboard/dashboard/results?search=DTXSD2000597#exec_sum</a> | Anticoagulant rodenticide inhibition of vitamin K epoxide reductase resulting coagulopathy and hemorrhage<br>Estrogen receptor activation leading to breast cancer | <a href="https://aopwiki.org/aops/187">https://aopwiki.org/aops/187</a><br><a href="https://aopwiki.org/aops/200">https://aopwiki.org/aops/200</a> | 1134 Irreversible inhibition of hepatic VKOR by binding of AR at tyrosine 139. Failure to cycle vitamin K epoxide to vitamin K to form vitamin K hydroquinone<br>1138 Uncoupling of oxidative phosphorylation, Reduced ability to generate ATP<br>1169 Anticoagulant rodenticide interferes with carboxylation of Glu proteins in bone. Impairment of post-translational modification (carboxylation) of osteocalcin<br>1181 Activation, Estrogen receptor | <a href="https://aopwiki.org/events/1134">https://aopwiki.org/events/1134</a><br><a href="https://aopwiki.org/events/1138">https://aopwiki.org/events/1138</a><br><a href="https://aopwiki.org/events/1169">https://aopwiki.org/events/1169</a><br><a href="https://aopwiki.org/events/1181">https://aopwiki.org/events/1181</a> | 1122 Under carboxylated clotting factors will not assemble on cell surfaces to form clot, Failure of secondary hemostasis<br>1130 Failure in vascular repair mechanisms. Unresolved blood loss (hemorrhage)<br>1131 Failure in gamma-glutamyl carboxylation of clotting factors II, VII, IX and X. Under carboxylation of clotting factors (e.g., des-gamma-carboxy prothrombin)<br>1132 Blood loss and development of anemia. Impaired oxygen delivery and nutrient delivery to tissue. Impaired carbon dioxide and waste product removal<br>1133 Hemostasis, Depletion from blood of fully functional carboxylated clotting factors<br>1135 Reduced fitness or even mortality. Acidosis, hypovolemic shock and organ dysfunction<br>1151 Osteoporosis and vascular calcification, Bone deterioration<br>1182 Increase, Cell Proliferation (Epithelial Cells)<br>1183 Decreased, Apoptosis (Epithelial Cells) | <b>1136 Impaired recruitment, Population trajectory</b><br><b>1193 N/A, Breast Cancer</b> | <a href="https://aopwiki.org/system/uploads/production/2016/11/29/11dApp-200.jpg">https://aopwiki.org/system/uploads/production/2016/11/29/11dApp-200.jpg</a> | 78년생, 여성 (불임) | <a href="#">AOPW169-21-1.jpg</a> | - 상성원자(군위), 변도계 - EDC/오리레이터 - 1997.2/2012.4 | - 2013.7/2017.2                  |  |                                     |                                                                                                                                                                                                                                                                                                                                                                                                                                                                                   |                                                              |                                             |                                  |
| <a href="#">Chaperone</a> | <a href="#">75-27-8</a>   | No AOPs available                                                                                                                                                                                                                          | <a href="https://comptox.epa.gov/dashboard/dashboard/results?search=DTXSD0000960#exec_sum">https://comptox.epa.gov/dashboard/dashboard/results?search=DTXSD0000960#exec_sum</a> |                                                                                                                                                                    |                                                                                                                                                    |                                                                                                                                                                                                                                                                                                                                                                                                                                                            |                                                                                                                                                                                                                                                                                                                                  |                                                                                                                                                                                                                                                                                                                                                                                                                                                                                                                                                                                                                                                                                                                                                                                                                                                                                                                |                                                                                           |                                                                                                                                                               |               |                                  |                                             |                                  |  |                                     | 60 Modulation of Adult Leydig Cell Function<br>Subsequent Glucocorticoid Activation in the Fetal Testis<br>95 Ether-a-go-go (ERG) voltage-gated potassium channel inhibition leading to reduced survival<br>187 Anticoagulant rodenticide inhibition of vitamin K epoxide reductase resulting coagulopathy and hemorrhage<br>MIE 1134 Irreversible inhibition of hepatic VKOR by binding of AR at tyrosine 139. Failure to cycle vitamin K epoxide to vitamin K to form vitamin K | 60년생, 여성 (불임)<br>- 상성원자(군위), 변도계 - MBT/오리레이터 - 2000.7/2003.3 | - 상성원자(군위), 변도계 - EDC/오리레이터 - 2000.7/2003.3 | - 2010.5/2010.9 - 2011.4/2014.11 |













|                                                |                            |                                       |                                                                                                                                                                           |                                                                                                                                                                                                                                                                                                                                             |                                                                                                                                                                                                                                               |                                                                                                                                                                                                                                                                                                                                                                                                                                    |                                                                                                                                                                                                                                                                                                                                                                                                                                                                                                                                                                                                                   |                                                                                                                                                                                                                                                                                                                                                                                                                                                                                                                                                                                                                                                                                                                                                                                                                                                                      |                                                                                                                                |                                  |                                                                                                                                                                                                                                                         |
|------------------------------------------------|----------------------------|---------------------------------------|---------------------------------------------------------------------------------------------------------------------------------------------------------------------------|---------------------------------------------------------------------------------------------------------------------------------------------------------------------------------------------------------------------------------------------------------------------------------------------------------------------------------------------|-----------------------------------------------------------------------------------------------------------------------------------------------------------------------------------------------------------------------------------------------|------------------------------------------------------------------------------------------------------------------------------------------------------------------------------------------------------------------------------------------------------------------------------------------------------------------------------------------------------------------------------------------------------------------------------------|-------------------------------------------------------------------------------------------------------------------------------------------------------------------------------------------------------------------------------------------------------------------------------------------------------------------------------------------------------------------------------------------------------------------------------------------------------------------------------------------------------------------------------------------------------------------------------------------------------------------|----------------------------------------------------------------------------------------------------------------------------------------------------------------------------------------------------------------------------------------------------------------------------------------------------------------------------------------------------------------------------------------------------------------------------------------------------------------------------------------------------------------------------------------------------------------------------------------------------------------------------------------------------------------------------------------------------------------------------------------------------------------------------------------------------------------------------------------------------------------------|--------------------------------------------------------------------------------------------------------------------------------|----------------------------------|---------------------------------------------------------------------------------------------------------------------------------------------------------------------------------------------------------------------------------------------------------|
| <a href="#">Methyl-omega-oxidation</a>         | <a href="#">75-75-2</a>    | No AOPs available<br>36<br>160<br>215 | <a href="https://comptox.epa.gov/dashboard/dstaadb/results?search=TXSD0264242#exec-sum">https://comptox.epa.gov/dashboard/dstaadb/results?search=TXSD0264242#exec-sum</a> | 36 Peroxisomal Fatty Acid Beta-Oxidation Inhibition Leading to Steatosis<br>160 Ionotropic gamma-aminobutyric acid receptor activation mediated neurotransmission inhibition leading to mortality<br>215 Inhibition of fatty acid beta oxidation leading to nonalcoholic steatohepatitis (NASH)                                             | ME 231 Decreased, PPAR-alpha activation<br>ME 232 Decreased, PPAR-beta activation<br>ME 233 Decreased, PPAR-gamma activation<br>ME 762 Activation, Ionotropic GABA Receptor chloride channel<br>ME 1490 Inhibition, Fatty Acid Beta Oxidation |                                                                                                                                                                                                                                                                                                                                                                                                                                    | KE 327 Accumulation, Fatty acid<br>KE 140 Decreased, HSD17B10 expression<br>KE 179 Decreased, Mitochondrial fatty acid beta-oxidation<br>KE 8 Decreased, 3-hydroxyacyl-CoA dehydrogenase type-2 activity<br>KE 1012 Increased, Inhibitory postsynaptic potential<br>KE 1014 Induction, Somatic muscle paralysis<br>KE 761 Increased, Chloride conductance<br>KE 1015 Increased, Neuronal synaptic inhibition<br>KE 1016 Inhibition, Feeding<br>KE 1305 Increase, cytosolic fatty acid<br>KE 459 Increased, Liver Steatosis<br>KE 1115 Increased, Reactive oxygen species<br>KE 1491 Increased, Oxidative Necrosis | AO 459 Increased, Liver Steatosis<br>AO 351 Increased Mortality<br>AO 1489 N/A, Steatohepatitis                                                                                                                                                                                                                                                                                                                                                                                                                                                                                                                                                                                                                                                                                                                                                                      |                                                                                                                                |                                  |                                                                                                                                                                                                                                                         |
| <a href="#">Methanol</a>                       | <a href="#">07-06-1</a>    | No AOPs available                     | <a href="https://comptox.epa.gov/dashboard/dstaadb/results?search=TXSD0019171#exec-sum">https://comptox.epa.gov/dashboard/dstaadb/results?search=TXSD0019171#exec-sum</a> |                                                                                                                                                                                                                                                                                                                                             |                                                                                                                                                                                                                                               |                                                                                                                                                                                                                                                                                                                                                                                                                                    |                                                                                                                                                                                                                                                                                                                                                                                                                                                                                                                                                                                                                   |                                                                                                                                                                                                                                                                                                                                                                                                                                                                                                                                                                                                                                                                                                                                                                                                                                                                      |                                                                                                                                |                                  |                                                                                                                                                                                                                                                         |
| <a href="#">Methyl celastrol agonism</a>       | <a href="#">110-41-6</a>   | No AOPs available<br>12<br>13         | <a href="https://comptox.epa.gov/dashboard/dstaadb/results?search=TXSD0025553#exec-sum">https://comptox.epa.gov/dashboard/dstaadb/results?search=TXSD0025553#exec-sum</a> | 12 Chronic binding of antagonist to N-methyl-D-aspartate receptors (NMDARs) during brain development leads to neurodegeneration with impairment in learning and memory in aging<br>13 Chronic binding of antagonist to N-methyl-D-aspartate receptors (NMDARs) during brain development induces impairment of learning and memory abilities | ME 201 Binding of antagonist, NMDA receptors<br>ME 201 Binding of antagonist, NMDA receptors                                                                                                                                                  |                                                                                                                                                                                                                                                                                                                                                                                                                                    | KE 195 Inhibition, NMDARs<br>KE 52 Decreased, Calcium influx<br>KE 381 Reduced levels of BDNF<br>KE 55 N/A, Cell injury/death<br>KE 188 N/A, Neuroinflammation<br>KE 52 Decreased, Calcium influx<br>KE 195 Inhibition, NMDARs<br>KE 381 Reduced levels of BDNF<br>KE 382 Aberrant, Dendritic morphology<br>KE 385 Decrease of synaptogenesis<br>KE 386 Decrease of neuronal network function<br>KE 383 Reduced, Presynaptic release of glutamate<br>KE 55 N/A, Cell injury/death                                                                                                                                 | AO 352 N/A, Neurodegeneration N/A, Neurodegeneration<br>AO 341 Impairment, Learning and memory<br>AO 341 Impairment, Learning and memory                                                                                                                                                                                                                                                                                                                                                                                                                                                                                                                                                                                                                                                                                                                             |                                                                                                                                |                                  |                                                                                                                                                                                                                                                         |
| <a href="#">Methyl formate</a>                 | <a href="#">107-31-3</a>   | No AOPs available<br>12<br>13         | <a href="https://comptox.epa.gov/dashboard/dstaadb/results?search=TXSD0026026#exec-sum">https://comptox.epa.gov/dashboard/dstaadb/results?search=TXSD0026026#exec-sum</a> | 12 Chronic binding of antagonist to N-methyl-D-aspartate receptors (NMDARs) during brain development leads to neurodegeneration with impairment in learning and memory in aging<br>13 Chronic binding of antagonist to N-methyl-D-aspartate receptors (NMDARs) during brain development induces impairment of learning and memory abilities | ME 201 Binding of antagonist, NMDA receptors<br>ME 201 Binding of antagonist, NMDA receptors<br>TOX21_HSE_BLA_agonist_ch2                                                                                                                     |                                                                                                                                                                                                                                                                                                                                                                                                                                    | KE 195 Inhibition, NMDARs<br>KE 52 Decreased, Calcium influx<br>KE 381 Reduced levels of BDNF<br>KE 55 N/A, Cell injury/death<br>KE 188 N/A, Neuroinflammation<br>KE 52 Decreased, Calcium influx<br>KE 195 Inhibition, NMDARs<br>KE 381 Reduced levels of BDNF<br>KE 382 Aberrant, Dendritic morphology<br>KE 385 Decrease of synaptogenesis<br>KE 386 Decrease of neuronal network function<br>KE 383 Reduced, Presynaptic release of glutamate<br>KE 55 N/A, Cell injury/death                                                                                                                                 | AO 352 N/A, Neurodegeneration N/A, Neurodegeneration<br>AO 341 Impairment, Learning and memory<br>AO 341 Impairment, Learning and memory                                                                                                                                                                                                                                                                                                                                                                                                                                                                                                                                                                                                                                                                                                                             |                                                                                                                                | <a href="#">aOP#107-31-3.jpg</a> |                                                                                                                                                                                                                                                         |
| <a href="#">Methyl isobutyl ketone</a>         | <a href="#">108-10-1</a>   | AOP Links: 12, 13, 60                 | <a href="https://comptox.epa.gov/dashboard/dstaadb/results?search=TXSD0018949#exec-sum">https://comptox.epa.gov/dashboard/dstaadb/results?search=TXSD0018949#exec-sum</a> | NR12 (Pregnane X Receptor, PXR) activation leading to hepatic steatosis                                                                                                                                                                                                                                                                     | <a href="https://aopwiki.org/aop/60">https://aopwiki.org/aop/60</a>                                                                                                                                                                           | 245 Activation, PXR/SXR                                                                                                                                                                                                                                                                                                                                                                                                            | <a href="https://aopwiki.org/events/245">https://aopwiki.org/events/245</a>                                                                                                                                                                                                                                                                                                                                                                                                                                                                                                                                       | 471 Inhibition, FoxA2<br>179 Decreased, Mitochondrial fatty acid beta-oxidation<br>472 Down Regulation, CPT1A<br>474 Down Regulation, HMGCS2<br>462 Up Regulation, SCD-1<br>54 Up Regulation, CD36<br>465 Increased, FA Influx<br>477 Decreased, Ketogenesis<br>454 Increased, Triglyceride formation<br>327 Accumulation, Fatty acid                                                                                                                                                                                                                                                                                                                                                                                                                                                                                                                                | 459 Increased, Liver Steatosis                                                                                                 |                                  | <a href="#">aOP#108-10-1.jpg</a>                                                                                                                                                                                                                        |
| <a href="#">Methyl-3-hydroxy isobutyrate</a>   | <a href="#">2110-78-3</a>  | No AOPs available<br>12, 13           | <a href="https://comptox.epa.gov/dashboard/dstaadb/results?search=TXSD0061848#exec-sum">https://comptox.epa.gov/dashboard/dstaadb/results?search=TXSD0061848#exec-sum</a> | 12 Chronic binding of antagonist to N-methyl-D-aspartate receptors (NMDARs) during brain development leads to neurodegeneration with impairment in learning and memory in aging<br>13 Chronic binding of antagonist to N-methyl-D-aspartate receptors (NMDARs) during brain development induces impairment of learning and memory abilities | ME 201 Binding of antagonist, NMDA receptors<br>ME 201 Binding of antagonist, NMDA receptors                                                                                                                                                  |                                                                                                                                                                                                                                                                                                                                                                                                                                    | KE 195 Inhibition, NMDARs<br>KE 52 Decreased, Calcium influx<br>KE 381 Reduced levels of BDNF<br>KE 55 N/A, Cell injury/death<br>KE 188 N/A, Neuroinflammation<br>KE 52 Decreased, Calcium influx<br>KE 195 Inhibition, NMDARs<br>KE 381 Reduced levels of BDNF<br>KE 382 Aberrant, Dendritic morphology<br>KE 385 Decrease of synaptogenesis<br>KE 386 Decrease of neuronal network function<br>KE 383 Reduced, Presynaptic release of glutamate<br>KE 55 N/A, Cell injury/death                                                                                                                                 | AO 352 N/A, Neurodegeneration N/A, Neurodegeneration<br>AO 341 Impairment, Learning and memory<br>AO 341 Impairment, Learning and memory                                                                                                                                                                                                                                                                                                                                                                                                                                                                                                                                                                                                                                                                                                                             |                                                                                                                                |                                  |                                                                                                                                                                                                                                                         |
| <a href="#">Methyl-3-methoxy isobutyrate</a>   | <a href="#">3852-09-1</a>  | AOP Links: 12, 13, 200                | <a href="https://comptox.epa.gov/dashboard/dstaadb/results?search=TXSD0034206#exec-sum">https://comptox.epa.gov/dashboard/dstaadb/results?search=TXSD0034206#exec-sum</a> | Estrogen receptor activation leading to breast cancer                                                                                                                                                                                                                                                                                       | <a href="https://aopwiki.org/aop/200">https://aopwiki.org/aop/200</a>                                                                                                                                                                         | 1181 Activation, Estrogen receptor                                                                                                                                                                                                                                                                                                                                                                                                 | <a href="https://aopwiki.org/events/1181">https://aopwiki.org/events/1181</a>                                                                                                                                                                                                                                                                                                                                                                                                                                                                                                                                     | 1182 Increase, Cell Proliferation (Epithelial Cells)<br>1183 Decreased, Apoptosis (Epithelial Cells)<br>1777 N/A, Mitochondrial dysfunction 1<br>1088 Increased, Oxidative Stress<br>1187 Increased, ER binding to DNA (classical pathway)<br>1188 Increased, ER binding to T.F. to DNA (non-classical pathway)<br>1189 Increased, Proliferation (Endothelial cells)<br>1190 Increased, Migration (Endothelial Cells)<br>1191 Increased, Non genomic signaling<br>1192 Increased, Ductal Hyperplasia<br>1194 Increase, DNA damage<br>1195 modulation, Extracellular Matrix Composition<br>1196 Increased, Invasion<br>1197 Activation, Fibroblasts<br>1198 Activation, Macrophages<br>1213 Increased, Angiogenesis<br>1239 Altered, Gene Expression<br>1240 Altered, Protein Production<br>1241 Increased, Metastasis<br>1242 Increased, Second Messenger Production | 1193 N/A, Breast Cancer                                                                                                        |                                  | <a href="https://aopwiki.org/system/@agony/production/2016/11/29/114Sep-200.jpg">https://aopwiki.org/system/@agony/production/2016/11/29/114Sep-200.jpg</a>                                                                                             |
| <a href="#">Methyl-3-oxo-5-oxoindole-3-one</a> | <a href="#">20172-05-4</a> | AOP Links: 60, 150, 187               | <a href="https://comptox.epa.gov/dashboard/dstaadb/results?search=TXSD0014388#exec-sum">https://comptox.epa.gov/dashboard/dstaadb/results?search=TXSD0014388#exec-sum</a> | NR12 (Pregnane X Receptor, PXR) activation leading to hepatic steatosis<br>via reduced VEGF<br>anticoagulant rodenticide inhibition of vitamin K epoxide reductase resulting coagulopathy and hemorrhage                                                                                                                                    | <a href="https://aopwiki.org/aop/60">https://aopwiki.org/aop/60</a><br><a href="https://aopwiki.org/aop/150">https://aopwiki.org/aop/150</a><br><a href="https://aopwiki.org/aop/187">https://aopwiki.org/aop/187</a>                         | 245 Activation, PXR/SXR<br>18 Activation, AHR<br>1134 Inverse/inhibitory of hepatic VDR by binding of Arylretinoid 13<br>93 Altered cytochrome P450 metabolism of vitamin K hydroquinone<br>1138 Inhibition of oxidative phosphorylation, Reduced ability to generate ATP<br>1169 Anticoagulant rodenticide interferes with carboxylation of Glaprotein B, Impaired post-translational modification (carboxylation) of osteocalcin | <a href="https://aopwiki.org/events/245">https://aopwiki.org/events/245</a><br><a href="https://aopwiki.org/events/18">https://aopwiki.org/events/18</a><br><a href="https://aopwiki.org/events/1134">https://aopwiki.org/events/1134</a><br><a href="https://aopwiki.org/events/1169">https://aopwiki.org/events/1169</a>                                                                                                                                                                                                                                                                                        | 471 Inhibition, FoxA2<br>179 Decreased, Mitochondrial fatty acid beta-oxidation<br>472 Down Regulation, CPT1A<br>474 Down Regulation, HMGCS2<br>462 Up Regulation, SCD-1<br>54 Up Regulation, CD36<br>465 Increased, FA Influx<br>477 Decreased, Ketogenesis<br>454 Increased, Triglyceride formation<br>327 Accumulation, Fatty acid<br>944 Demethylation, AHR/ARNT<br>945 Reduced methylation, ARNT/HNF1-alpha                                                                                                                                                                                                                                                                                                                                                                                                                                                     | 459 Increased, Liver Steatosis<br>947 Increase, Early Life Stage Mortality<br>1136 Impaired recruitment, Population trajectory |                                  | <a href="https://aopwiki.org/system/@agony/production/2018/03/28/9thInwavy_AOP-150_graphical_representation_March_28_2018.jpg">https://aopwiki.org/system/@agony/production/2018/03/28/9thInwavy_AOP-150_graphical_representation_March_28_2018.jpg</a> |
| <a href="#">Methyl-3-oxo-5-oxoindole-3-one</a> | <a href="#">11136-78-9</a> | No AOPs available                     | <a href="https://comptox.epa.gov/dashboard/dstaadb/results?search=TXSD0014388#exec-sum">https://comptox.epa.gov/dashboard/dstaadb/results?search=TXSD0014388#exec-sum</a> |                                                                                                                                                                                                                                                                                                                                             |                                                                                                                                                                                                                                               |                                                                                                                                                                                                                                                                                                                                                                                                                                    |                                                                                                                                                                                                                                                                                                                                                                                                                                                                                                                                                                                                                   |                                                                                                                                                                                                                                                                                                                                                                                                                                                                                                                                                                                                                                                                                                                                                                                                                                                                      |                                                                                                                                |                                  |                                                                                                                                                                                                                                                         |
| <a href="#">N-2-Hydroxyethylformamide</a>      | <a href="#">111-41-1</a>   | No AOPs available                     | <a href="https://comptox.epa.gov/dashboard/dstaadb/results?search=TXSD0026424#exec-sum">https://comptox.epa.gov/dashboard/dstaadb/results?search=TXSD0026424#exec-sum</a> |                                                                                                                                                                                                                                                                                                                                             |                                                                                                                                                                                                                                               |                                                                                                                                                                                                                                                                                                                                                                                                                                    |                                                                                                                                                                                                                                                                                                                                                                                                                                                                                                                                                                                                                   |                                                                                                                                                                                                                                                                                                                                                                                                                                                                                                                                                                                                                                                                                                                                                                                                                                                                      |                                                                                                                                |                                  | <a href="#">aOP#111-41-1.jpg</a>                                                                                                                                                                                                                        |
| <a href="#">Naphthalene</a>                    | <a href="#">81-20-3</a>    | AOP Links: 60, 124, 200               |                                                                                                                                                                           | NR12 (Pregnane X Receptor, PXR) activation leading to hepatic steatosis                                                                                                                                                                                                                                                                     | ME 245 Activation, PXR/SXR                                                                                                                                                                                                                    |                                                                                                                                                                                                                                                                                                                                                                                                                                    | KE 471 Inhibition, FoxA2<br>KE 179 Decreased, Mitochondrial fatty acid beta-oxidation<br>KE 472 Down Regulation, CPT1A<br>KE 474 Down Regulation, HMGCS2<br>KE 462 Up Regulation, SCD-1<br>KE 54 Up Regulation, CD36<br>KE 465 Increased, FA Influx<br>KE 477 Decreased, Ketogenesis<br>KE 454 Increased, Triglyceride formation<br>KE 327 Accumulation, Fatty acid                                                                                                                                                                                                                                               | AO 459 Increased, Liver Steatosis                                                                                                                                                                                                                                                                                                                                                                                                                                                                                                                                                                                                                                                                                                                                                                                                                                    |                                                                                                                                | <a href="#">aOP#81-20-3.jpg</a>  |                                                                                                                                                                                                                                                         |
| <a href="#">Naphthalene</a>                    |                            |                                       |                                                                                                                                                                           | 124                                                                                                                                                                                                                                                                                                                                         | HMG-CoA reductase inhibition leading to decreased fertility                                                                                                                                                                                   | ME 804 Inhibition, HMG-CoA reductase                                                                                                                                                                                                                                                                                                                                                                                               |                                                                                                                                                                                                                                                                                                                                                                                                                                                                                                                                                                                                                   | KE 805 Decreased, mevalonate<br>KE 807 Decreased, cholesterol<br>KE 808 Decreased, Testosterone<br>KE 809 malformed, Male reproductive tract                                                                                                                                                                                                                                                                                                                                                                                                                                                                                                                                                                                                                                                                                                                         | AO 330 Decrease, Fertility                                                                                                     |                                  | <a href="#">aOP#81-20-3.jpg</a>                                                                                                                                                                                                                         |

|                                                  |                            |                                   |                                                                                                                                                                           |                                                                                                                                                                                                                                                                                                                |                                                                                                           |                                                                                                                                                                                                                                                                                                                                                                                                                                              |                                                                               |                                                                                                                                                                                                                                                                                                                                                                                                                                                                                                                                                                                                                                                                                                                                                                                                                                                                                                                                                                                                                  |                                                                                                                                                      |                                                                                                                                                                                                                                                                                                                                            |                |                                                                   |                                                                               |                                 |  |
|--------------------------------------------------|----------------------------|-----------------------------------|---------------------------------------------------------------------------------------------------------------------------------------------------------------------------|----------------------------------------------------------------------------------------------------------------------------------------------------------------------------------------------------------------------------------------------------------------------------------------------------------------|-----------------------------------------------------------------------------------------------------------|----------------------------------------------------------------------------------------------------------------------------------------------------------------------------------------------------------------------------------------------------------------------------------------------------------------------------------------------------------------------------------------------------------------------------------------------|-------------------------------------------------------------------------------|------------------------------------------------------------------------------------------------------------------------------------------------------------------------------------------------------------------------------------------------------------------------------------------------------------------------------------------------------------------------------------------------------------------------------------------------------------------------------------------------------------------------------------------------------------------------------------------------------------------------------------------------------------------------------------------------------------------------------------------------------------------------------------------------------------------------------------------------------------------------------------------------------------------------------------------------------------------------------------------------------------------|------------------------------------------------------------------------------------------------------------------------------------------------------|--------------------------------------------------------------------------------------------------------------------------------------------------------------------------------------------------------------------------------------------------------------------------------------------------------------------------------------------|----------------|-------------------------------------------------------------------|-------------------------------------------------------------------------------|---------------------------------|--|
| <a href="#">Nucleosome</a>                       |                            |                                   |                                                                                                                                                                           | 200                                                                                                                                                                                                                                                                                                            | Estrogen receptor activation leading to breast cancer                                                     | ME 1181 Activation, Estrogen receptor                                                                                                                                                                                                                                                                                                                                                                                                        |                                                                               | <p>KE 1182 Increase, Cell Proliferation (Epithelial Cells)</p> <p>KE 1183 Decreased, Apoptosis (Epithelial Cells)</p> <p>KE 177 N/A, Mitochondrial dysfunction 1</p> <p>KE 1088 Increased, Oxidative Stress</p> <p>KE 1187 Increased, ER binding to DNA (classical pathway)</p> <p>KE 1188 Increased, ER binding to T.F. to DNA (non-classical pathway)</p> <p>KE 1189 Increased, Proliferation (Endothelial cells)</p> <p>KE 1190 Increased, Migration (Endothelial Cells)</p> <p>KE 1191 Increased, Non-genomic signaling</p> <p>KE 1192 Increased, Ductal Hyperplasia</p> <p>KE 1194 Increase, DNA damage</p> <p>KE 1195 modulation, Extracellular Matrix Composition</p> <p>KE 1196 Increased, Invasion</p> <p>KE 1197 Activation, Fibroblasts</p> <p>KE 1198 Activation, Macrophages</p> <p>KE 1213 Increased, Angiogenesis</p> <p>KE 1239 Altered, Gene Expression</p> <p>KE 1240 Altered, Protein Production</p> <p>KE 1241 Increased, Motility</p> <p>KE 1242 Increased, Second Messenger Production</p> | AO 1193 N/A, Breast Cancer                                                                                                                           |                                                                                                                                                                                                                                                                                                                                            |                |                                                                   | <a href="#">AOPW11-20-3.jpg</a>                                               |                                 |  |
| <a href="#">HMG CoA reductase</a>                | <a href="#">123-81-4</a>   | AOP Links: 124                    | <a href="https://comptox.epa.gov/dashboard/dstowb/results?searchid=TXSD021982#view_sum">https://comptox.epa.gov/dashboard/dstowb/results?searchid=TXSD021982#view_sum</a> | HMG-CoA reductase inhibition leading to decreased fertility                                                                                                                                                                                                                                                    | <a href="https://aopwiki.org/aop/724">https://aopwiki.org/aop/724</a>                                     | 804 Inhibition, HMG-CoA reductase                                                                                                                                                                                                                                                                                                                                                                                                            | <a href="https://aopwiki.org/events/804">https://aopwiki.org/events/804</a>   | <p>805 Decreased, mevalonate</p> <p>807 Decreased, cholesterol</p> <p>808 Decreased, Testosterone</p> <p>809 malformed, Male reproductive tract</p>                                                                                                                                                                                                                                                                                                                                                                                                                                                                                                                                                                                                                                                                                                                                                                                                                                                              | 330 Decrease, Fertility                                                                                                                              |                                                                                                                                                                                                                                                                                                                                            |                |                                                                   |                                                                               | <a href="#">AOPW11-86-4.jpg</a> |  |
| <a href="#">Estrogen receptor</a>                | <a href="#">21-36-4</a>    | AOP Links: 200                    | <a href="https://comptox.epa.gov/dashboard/dstowb/results?searchid=TXSD102138#view_sum">https://comptox.epa.gov/dashboard/dstowb/results?searchid=TXSD102138#view_sum</a> | estrogen receptor activation leading to breast cancer                                                                                                                                                                                                                                                          | <a href="https://aopwiki.org/aop/200">https://aopwiki.org/aop/200</a>                                     | 1181 Activation, Estrogen receptor                                                                                                                                                                                                                                                                                                                                                                                                           | <a href="https://aopwiki.org/events/1181">https://aopwiki.org/events/1181</a> | <p>1182 Increase, Cell Proliferation (Epithelial Cells)</p> <p>1183 Decreased, Apoptosis (Epithelial Cells)</p> <p>177 N/A, Mitochondrial dysfunction 1</p> <p>1088 Increased, Oxidative Stress</p> <p>1187 Increased, ER binding to DNA (classical pathway)</p> <p>1188 Increased, ER binding to T.F. to DNA (non-classical pathway)</p> <p>1189 Increased, Proliferation (Endothelial cells)</p> <p>1190 Increased, Migration (Endothelial Cells)</p> <p>1191 Increased, Non-genomic signaling</p> <p>1192 Increased, Ductal Hyperplasia</p> <p>1194 Increase, DNA damage</p> <p>1195 modulation, Extracellular Matrix Composition</p> <p>1196 Increased, Invasion</p> <p>1197 Activation, Fibroblasts</p> <p>1198 Activation, Macrophages</p> <p>1213 Increased, Angiogenesis</p> <p>1239 Altered, Gene Expression</p> <p>1240 Altered, Protein Production</p> <p>1241 Increased, Motility</p> <p>1242 Increased, Second Messenger Production</p>                                                             | 1193 N/A, Breast Cancer                                                                                                                              |                                                                                                                                                                                                                                                                                                                                            |                |                                                                   | <a href="#">AOPW11-36-3.jpg</a>                                               |                                 |  |
| <a href="#">NR1H2 (Pregnane X Receptor, PXR)</a> | <a href="#">249-08-6</a>   | AOP Links: 60                     |                                                                                                                                                                           | 60                                                                                                                                                                                                                                                                                                             | NR1H2 (Pregnane X Receptor, PXR) activation leading to hepatic steatosis                                  | ME 245 Activation, PXR/SXR                                                                                                                                                                                                                                                                                                                                                                                                                   |                                                                               | <p>KE 471 Inhibition, FoxA2</p> <p>KE 179 Decreased, Mitochondrial fatty acid beta-oxidation</p> <p>KE 472 Down Regulation, CPT1A</p> <p>KE 474 Down Regulation, HMGCS2</p> <p>KE 482 Up Regulation, SCD-1</p> <p>KE 54 Up Regulation, CD36</p> <p>KE 465 Increased, FA Influx</p> <p>KE 477 Decreased, Ketogenesis</p> <p>KE 454 Increased, Triglyceride formation</p> <p>KE 327 Accumulation, Fatty acid</p>                                                                                                                                                                                                                                                                                                                                                                                                                                                                                                                                                                                                   | AO 459 Increased, Liver Steatosis                                                                                                                    |                                                                                                                                                                                                                                                                                                                                            |                |                                                                   | <a href="#">AOPW1426-08-6.jpg</a>                                             |                                 |  |
| <a href="#">FOXO1</a>                            | <a href="#">180-54-3</a>   | No AOPs available                 | <a href="https://comptox.epa.gov/dashboard/dstowb/results?searchid=TXSD007191#view_sum">https://comptox.epa.gov/dashboard/dstowb/results?searchid=TXSD007191#view_sum</a> |                                                                                                                                                                                                                                                                                                                |                                                                                                           |                                                                                                                                                                                                                                                                                                                                                                                                                                              |                                                                               |                                                                                                                                                                                                                                                                                                                                                                                                                                                                                                                                                                                                                                                                                                                                                                                                                                                                                                                                                                                                                  |                                                                                                                                                      |                                                                                                                                                                                                                                                                                                                                            |                |                                                                   |                                                                               |                                 |  |
| <a href="#">HNF1A</a>                            | <a href="#">246-02-2</a>   | No AOPs available                 | <a href="https://comptox.epa.gov/dashboard/dstowb/results?searchid=TXSD002695#view_sum">https://comptox.epa.gov/dashboard/dstowb/results?searchid=TXSD002695#view_sum</a> |                                                                                                                                                                                                                                                                                                                |                                                                                                           |                                                                                                                                                                                                                                                                                                                                                                                                                                              |                                                                               |                                                                                                                                                                                                                                                                                                                                                                                                                                                                                                                                                                                                                                                                                                                                                                                                                                                                                                                                                                                                                  |                                                                                                                                                      |                                                                                                                                                                                                                                                                                                                                            |                |                                                                   |                                                                               |                                 |  |
| <a href="#">Nrf2</a>                             | <a href="#">13463-99-3</a> | No AOPs available                 | <a href="https://comptox.epa.gov/dashboard/dstowb/results?searchid=TXSD007427#view_sum">https://comptox.epa.gov/dashboard/dstowb/results?searchid=TXSD007427#view_sum</a> |                                                                                                                                                                                                                                                                                                                |                                                                                                           |                                                                                                                                                                                                                                                                                                                                                                                                                                              |                                                                               |                                                                                                                                                                                                                                                                                                                                                                                                                                                                                                                                                                                                                                                                                                                                                                                                                                                                                                                                                                                                                  |                                                                                                                                                      |                                                                                                                                                                                                                                                                                                                                            |                |                                                                   |                                                                               |                                 |  |
| <a href="#">Nrf1</a>                             | <a href="#">1813-99-1</a>  | No AOPs available                 | <a href="https://comptox.epa.gov/dashboard/dstowb/results?searchid=TXSD002579#view_sum">https://comptox.epa.gov/dashboard/dstowb/results?searchid=TXSD002579#view_sum</a> |                                                                                                                                                                                                                                                                                                                |                                                                                                           |                                                                                                                                                                                                                                                                                                                                                                                                                                              |                                                                               |                                                                                                                                                                                                                                                                                                                                                                                                                                                                                                                                                                                                                                                                                                                                                                                                                                                                                                                                                                                                                  |                                                                                                                                                      |                                                                                                                                                                                                                                                                                                                                            |                |                                                                   |                                                                               |                                 |  |
| <a href="#">Nrf2</a>                             | <a href="#">2607-37-2</a>  | No AOPs available<br>213, 160, 36 | <a href="https://comptox.epa.gov/dashboard/dstowb/results?searchid=TXSD002695#view_sum">https://comptox.epa.gov/dashboard/dstowb/results?searchid=TXSD002695#view_sum</a> | <p>36 Peroxisomal Fatty Acid Beta-Oxidation Inhibition Leading to Steatosis</p> <p>160 Ionotropic gamma-aminobutyric acid receptor activation mediated neurotransmission inhibition leading to mortality</p> <p>213 Inhibition of fatty acid beta oxidation leading to nonalcoholic steatohepatitis (NASH)</p> |                                                                                                           | <p>ME 231 Decreased, PPAR-alpha activation</p> <p>ME 232 Decreased, PPAR-beta activation</p> <p>ME 233 Decreased, PPAR-gamma activation</p> <p>ME 762 Activation, ionotropic GABA Receptor chloride channel</p> <p>ME 1490 Inhibition, Fatty Acid Beta Oxidation</p>                                                                                                                                                                         |                                                                               | <p>KE 327 Accumulation, Fatty acid</p> <p>KE 140 Decreased, HSD17B10 expression</p> <p>KE 179 Decreased, Mitochondrial fatty acid beta-oxidation</p> <p>KE 8 Decreased, 3-hydroxyacyl-CoA dehydrogenase type 2 activity</p> <p>KE 1012 Increased, Inhibitory postsynaptic potential</p> <p>KE 1014 Induction, Somatic muscle paralysis</p> <p>KE 761 Increased, Chloride conductance</p> <p>KE 1015 Increased, Neuronal synaptic inhibition</p> <p>KE 1016 Inhibition, Feeding</p> <p>KE 1305 Increase, cytosolic fatty acid</p> <p>KE 459 Increased, Liver Steatosis</p> <p>KE 1115 Increased, Reactive oxygen species</p> <p>KE 1491 Increased, Oncotic Necrosis</p>                                                                                                                                                                                                                                                                                                                                           | <p>AO 459 Increased, Liver Steatosis</p> <p>AO 351 Increased Mortality</p> <p>AO 1489 N/A, Steatohepatitis</p>                                       | <p>296 Oxidative DNA damage leading to chromosomal aberrations and mutations</p> <p>ME 1634 Increase, Oxidative damage to DNA</p> <p>KE 155 N/A, Inadequate DNA repair</p> <p>KE 1635 Increase, DNA strand breaks</p> <p>AO 185 Increase, Mutations</p> <p>AO 1636 Increase, Chromosomal aberrations Increase, Chromosomal aberrations</p> | 84년생, 여성 (백일방) | - 상왕전자(천연)_LCD<br>- 식민, BM, RG2, 경<br>사, LIV Adher, CFS/O<br>피라미터 | - 변연, 포름알데히드,<br>과산화수소, 불산, 황<br>산, 원산, THAM,<br>PGMEA 등<br>전리방사선, 비전리<br>방사선 |                                 |  |
| <a href="#">Nrf2</a>                             | <a href="#">10102-43-3</a> | No AOPs available<br>294          | <a href="https://comptox.epa.gov/dashboard/dstowb/results?searchid=TXSD102693#view_sum">https://comptox.epa.gov/dashboard/dstowb/results?searchid=TXSD102693#view_sum</a> | 294 Increased reactive oxygen and nitrogen species (RONS) leading to increased risk of breast cancer                                                                                                                                                                                                           |                                                                                                           | ME 1632 Increase in reactive oxygen and nitrogen species (RONS)                                                                                                                                                                                                                                                                                                                                                                              |                                                                               | <p>KE 1182 Increase, Cell Proliferation (Epithelial Cells)</p> <p>KE 1402 Tissue resident cell activation</p> <p>KE 1483 Increased Pro-inflammatory mediators</p> <p>KE 1494 Leukocyte recruitment/activation</p>                                                                                                                                                                                                                                                                                                                                                                                                                                                                                                                                                                                                                                                                                                                                                                                                | <p>AO 1194 Increase, DNA damage</p> <p>AO 185 Increase, Mutations</p> <p>AO 1192 Increased, Ductal Hyperplasia</p> <p>AO 1193 N/A, Breast Cancer</p> |                                                                                                                                                                                                                                                                                                                                            |                |                                                                   |                                                                               |                                 |  |
| <a href="#">Nrf2</a>                             | <a href="#">18851-72-0</a> | No AOPs available                 |                                                                                                                                                                           |                                                                                                                                                                                                                                                                                                                |                                                                                                           |                                                                                                                                                                                                                                                                                                                                                                                                                                              |                                                                               |                                                                                                                                                                                                                                                                                                                                                                                                                                                                                                                                                                                                                                                                                                                                                                                                                                                                                                                                                                                                                  |                                                                                                                                                      |                                                                                                                                                                                                                                                                                                                                            |                |                                                                   |                                                                               |                                 |  |
| <a href="#">Nrf2</a>                             | <a href="#">139-11-0</a>   | AOP Links: 187, 200               |                                                                                                                                                                           | 187                                                                                                                                                                                                                                                                                                            | Anticoagulant rodenticide inhibition of vitamin K epoxide reductase resulting coagulopathy and hemorrhage | <p>ME 1134 Irreversible inhibition of hepatic VKOR by binding of AR at tyrosine 139, Failure to cycle vitamin K epoxide to vitamin K to form vitamin K hydroquinone</p> <p>ME 1138 Uncoupling of oxidative phosphorylation, Reduced ability to generate ATP</p> <p>ME 1169 Anticoagulant rodenticide interferes with carboxylation of Gla proteins in bone, Impairment of post-translational modification (carboxylation) of osteocalcin</p> |                                                                               | <p>KE 1122 Under carboxylated clotting factors will not assemble on cell surfaces to form clot, Failure of secondary hemostasis</p> <p>KE 1130 Failure in vascular repair mechanisms, Unresolved blood loss (hemorrhage)</p> <p>KE 1131 Failure in gamma-glutamyl carboxylation of clotting factors II, VII, IX and X, Under carboxylation of clotting factors (e.g., des-gamma-carboxy prothrombin)</p> <p>KE 1132 Blood loss and development of anemia, Impaired oxygen delivery and nutrient delivery to tissue, impaired carbon dioxide and waste product removal</p> <p>KE 1133 Hemostasis, Depletion from blood of fully functional carboxylated clotting factors</p> <p>KE 1135 Reduced fitness or even mortality, Acidosis, hypovolemic shock and organ dysfunction</p> <p>KE 1151 Osteoporosis and vascular calcification, Bone deterioration</p>                                                                                                                                                       | AO 1136 Impaired recruitment - Population trajectory                                                                                                 |                                                                                                                                                                                                                                                                                                                                            |                |                                                                   | <a href="#">AOPW1139-11-0.jpg</a>                                             |                                 |  |







|                          |            |                                                |                                                                                                                                                                 |                                                                                                                                                                                                                                                                                                      |                                                                                                                                                                                                                         |                                                                                                                                                                                                                                                                                                                                                                                                                                                                                                                        |                                                                                                                                                                                                                                                                                                                                                                                                                 |                                                                                                                                                                                                                                                                                                                                                                                                                                                                                                                                                                                                                                                                                                                                                                                                                                                                                                                                                                                                                                                                                                                                                                                                                                                                                                                                                                                                                                                                                                                    |                                                                                                                                           |                                                                                                                                                                                                                                                                                                                                                                                                      |                                  |
|--------------------------|------------|------------------------------------------------|-----------------------------------------------------------------------------------------------------------------------------------------------------------------|------------------------------------------------------------------------------------------------------------------------------------------------------------------------------------------------------------------------------------------------------------------------------------------------------|-------------------------------------------------------------------------------------------------------------------------------------------------------------------------------------------------------------------------|------------------------------------------------------------------------------------------------------------------------------------------------------------------------------------------------------------------------------------------------------------------------------------------------------------------------------------------------------------------------------------------------------------------------------------------------------------------------------------------------------------------------|-----------------------------------------------------------------------------------------------------------------------------------------------------------------------------------------------------------------------------------------------------------------------------------------------------------------------------------------------------------------------------------------------------------------|--------------------------------------------------------------------------------------------------------------------------------------------------------------------------------------------------------------------------------------------------------------------------------------------------------------------------------------------------------------------------------------------------------------------------------------------------------------------------------------------------------------------------------------------------------------------------------------------------------------------------------------------------------------------------------------------------------------------------------------------------------------------------------------------------------------------------------------------------------------------------------------------------------------------------------------------------------------------------------------------------------------------------------------------------------------------------------------------------------------------------------------------------------------------------------------------------------------------------------------------------------------------------------------------------------------------------------------------------------------------------------------------------------------------------------------------------------------------------------------------------------------------|-------------------------------------------------------------------------------------------------------------------------------------------|------------------------------------------------------------------------------------------------------------------------------------------------------------------------------------------------------------------------------------------------------------------------------------------------------------------------------------------------------------------------------------------------------|----------------------------------|
| <a href="#">Research</a> | 150-85-0   | AOP Links: 107, 187, 200                       | <a href="https://comptox.epa.gov/dashboard/chemsearch?search=TX501021164#view=sum">https://comptox.epa.gov/dashboard/chemsearch?search=TX501021164#view=sum</a> | Constitutive androstane receptor activation leading to hepatocellular adenomas and carcinomas in the mouse and the rat<br><br>Anticoagulant rodenticide inhibition of vitamin K epoxide reductase resulting coagulopathy and hemorrhage<br><br>Estrogen receptor activation leading to breast cancer | <a href="https://aopwiki.org/aop/107">https://aopwiki.org/aop/107</a><br><a href="https://aopwiki.org/aop/187">https://aopwiki.org/aop/187</a><br><a href="https://aopwiki.org/aop/200">https://aopwiki.org/aop/200</a> | 715 Activation, Constitutive androstane receptor<br><br>1134 Irreversible inhibition of hepatic VKOR by binding of AR at tyrosine 139. Failure to cycle vitamin K epoxide to vitamin K to form vitamin K hydroquinone<br>1138 Uncoupling of oxidative phosphorylation, Reduced ability to generate ATP<br>1169 Anticoagulant rodenticide interferes with carboxylation of Gla proteins in bone. Impairment of post-translational modification (carboxylation) of osteocalcin<br><br>1181 Activation, Estrogen receptor | <a href="https://aopwiki.org/events/715">https://aopwiki.org/events/715</a><br><a href="https://aopwiki.org/events/1134">https://aopwiki.org/events/1134</a><br><a href="https://aopwiki.org/events/1138">https://aopwiki.org/events/1138</a><br><a href="https://aopwiki.org/events/1169">https://aopwiki.org/events/1169</a><br><a href="https://aopwiki.org/events/1181">https://aopwiki.org/events/1181</a> | 1214 Altered gene expression specific to CAR activation, Hepatocytes<br>716 Increase, Mitogenic cell proliferation (hepatocytes)<br>774 Increase, Preneoplastic foci (hepatocytes)<br>1122 Under carboxylated clotting factors will not assemble on cell surfaces to form clot, Failure of secondary hemostasis<br>1130 Failure in vascular repair mechanisms, Unresolved blood loss (hemorrhage)<br>1131 Failure in gamma-glutamyl carboxylation of clotting factors II, VII, IX and X. Under carboxylation of clotting factors (e.g., des-gamma-carboxy prothrombin)<br>1132 Blood loss and development of anemia, Impaired oxygen delivery and nutrient delivery to tissue, Impaired carbon dioxide and waste product removal<br>1133 Hemostasis, Depletion from blood of fully functional carboxylated clotting factors<br>1135 Reduced fitness or even mortality, Acidosis, hypovolemic shock and organ dysfunction<br>1182 Increase, Cell Proliferation (Epithelial Cells)<br>1183 Decreased, Apoptosis (Epithelial Cells)<br>1177 N/A, Mitochondrial dysfunction 1<br>1088 Increased, Oxidative Stress<br>1187 Increased, ER binding to DNA (classical pathway)<br>1188 Increased, ER binding to T.F. to DNA (non-classical pathway)<br>1189 Increased, Proliferation (Endothelial cells)<br>1190 Increased, Migration (Endothelial Cells)<br>1191 Increased, Non-genomic signaling<br>1192 Increased, Ductal Hyperplasia<br>1194 Increase, DNA damage<br>1195 modulation, Extracellular Matrix Composition | 719 Increase, Adenomas/carcinomas (hepatocellular)<br><br>1136 Impaired recruitment, Population trajectory<br><br>1193 N/A, Breast Cancer | <a href="https://aopwiki.org/system/@aopwiki/production/2018/05/31/1111026.html?graph=CAR_AOP_revised_May2018.pdf">https://aopwiki.org/system/@aopwiki/production/2018/05/31/1111026.html?graph=CAR_AOP_revised_May2018.pdf</a><br><br><a href="https://aopwiki.org/system/@aopwiki/benchmark/2016/11/29/114aop-200.jpg">https://aopwiki.org/system/@aopwiki/benchmark/2016/11/29/114aop-200.jpg</a> | <a href="#">AOP#110-85-0.jpg</a> |
| <a href="#">Research</a> | 7440-86-4  | No AOPs available<br>27                        | <a href="https://comptox.epa.gov/dashboard/chemsearch?search=TX501021164#view=sum">https://comptox.epa.gov/dashboard/chemsearch?search=TX501021164#view=sum</a> | 27 Cholestatic Liver Injury induced by inhibition of the Bile Salt Export Pump (ABCB1)                                                                                                                                                                                                               |                                                                                                                                                                                                                         | ME 41 Inhibition, Bile Salt Export Pump (ABCB1)                                                                                                                                                                                                                                                                                                                                                                                                                                                                        |                                                                                                                                                                                                                                                                                                                                                                                                                 | KE 289 Activation of specific nuclear receptors, Transcriptional change<br>KE 214 bile accumulation, Pathological condition<br>KE 87 Release, Cytokine<br>KE 149 Increase, Inflammation<br>KE 249 Production, Reactive oxygen species<br>KE 209 Peptide Oxidation                                                                                                                                                                                                                                                                                                                                                                                                                                                                                                                                                                                                                                                                                                                                                                                                                                                                                                                                                                                                                                                                                                                                                                                                                                                  | AO 357 Cholestasis, Pathology                                                                                                             |                                                                                                                                                                                                                                                                                                                                                                                                      |                                  |
| <a href="#">Research</a> | 25327-68-1 | No AOPs available                              | <a href="https://comptox.epa.gov/dashboard/chemsearch?search=TX50467786#view=sum">https://comptox.epa.gov/dashboard/chemsearch?search=TX50467786#view=sum</a>   |                                                                                                                                                                                                                                                                                                      |                                                                                                                                                                                                                         |                                                                                                                                                                                                                                                                                                                                                                                                                                                                                                                        |                                                                                                                                                                                                                                                                                                                                                                                                                 |                                                                                                                                                                                                                                                                                                                                                                                                                                                                                                                                                                                                                                                                                                                                                                                                                                                                                                                                                                                                                                                                                                                                                                                                                                                                                                                                                                                                                                                                                                                    |                                                                                                                                           |                                                                                                                                                                                                                                                                                                                                                                                                      |                                  |
| <a href="#">Research</a> | 9003-11-4  | AOP Links: 60, 187                             | <a href="https://comptox.epa.gov/dashboard/chemsearch?search=TX50467786#view=sum">https://comptox.epa.gov/dashboard/chemsearch?search=TX50467786#view=sum</a>   | NR12 (Pregnane X Receptor, PXR) activation leading to hepatic steatosis<br><br>Anticoagulant rodenticide inhibition of vitamin K epoxide reductase resulting coagulopathy and hemorrhage                                                                                                             | <a href="https://aopwiki.org/aop/60">https://aopwiki.org/aop/60</a><br><a href="https://aopwiki.org/aop/187">https://aopwiki.org/aop/187</a>                                                                            | 245 Activation, PXR/XR<br><br>1134 Irreversible inhibition of hepatic VKOR by binding of AR at tyrosine 139. Failure to cycle vitamin K epoxide to vitamin K to form vitamin K hydroquinone<br>1138 Uncoupling of oxidative phosphorylation, Reduced ability to generate ATP<br>1169 Anticoagulant rodenticide interferes with carboxylation of Gla proteins in bone. Impairment of post-translational modification (carboxylation) of osteocalcin                                                                     | <a href="https://aopwiki.org/events/245">https://aopwiki.org/events/245</a><br><a href="https://aopwiki.org/events/1134">https://aopwiki.org/events/1134</a><br><a href="https://aopwiki.org/events/1138">https://aopwiki.org/events/1138</a><br><a href="https://aopwiki.org/events/1169">https://aopwiki.org/events/1169</a>                                                                                  | 471 Inhibition, FoxA2 inhibition, FoxA2<br>179 Decreased, Mitochondrial fatty acid beta-oxidation<br>472 Down Regulation, CPT1A<br>474 Down Regulation, HMGCS2<br>482 Up Regulation, SCD-1<br>54 Up Regulation, CD36<br>465 Increased, FA influx<br>477 Decreased, Ketogenesis<br>454 Increased, Triglyceride formation<br>327 Accumulation, Fatty acid<br>1122 Under carboxylated clotting factors will not assemble on cell surfaces to form clot, Failure of secondary hemostasis<br>1130 Failure in vascular repair mechanisms, Unresolved blood loss (hemorrhage)<br>1131 Failure in gamma-glutamyl carboxylation of clotting factors II, VII, IX and X. Under carboxylation of clotting factors (e.g., des-gamma-carboxy prothrombin)<br>1132 Blood loss and development of anemia, Impaired oxygen delivery and nutrient delivery to tissue, Impaired carbon dioxide and waste product removal<br>1133 Hemostasis, Depletion from blood of fully functional carboxylated clotting factors<br>1135 Reduced fitness or even mortality, Acidosis, hypovolemic shock and organ dysfunction<br>1151 Osteoporosis and vascular calcification, Bone deterioration                                                                                                                                                                                                                                                                                                                                                  | 459 Increased, Liver Steatosis<br><br>1136 Impaired recruitment, Population trajectory                                                    | <a href="#">AOP#903-11-6.jpg</a>                                                                                                                                                                                                                                                                                                                                                                     |                                  |
| <a href="#">Research</a> | 7779-50-4  | AOP Links: 36, 61, 66, 107, 153, 163, 187, 200 |                                                                                                                                                                 | Peroxisomal Fatty Acid Beta-Oxidation inhibition leading to Steatosis                                                                                                                                                                                                                                |                                                                                                                                                                                                                         | ME 231 Decreased, PPAR-alpha activation<br>ME 232 Decreased, PPAR-beta activation<br>ME 233 Decreased, PPAR-gamma activation                                                                                                                                                                                                                                                                                                                                                                                           |                                                                                                                                                                                                                                                                                                                                                                                                                 | KE 327 Accumulation, Fatty acid<br>KE 140 Decreased, HSD17B10 expression<br>KE 179 Decreased, Mitochondrial fatty acid beta-oxidation<br>KE 8 Decreased, 3-hydroxyacyl-CoA dehydrogenase type-2 activity<br>KE 480 Activation, SHF<br>KE 227 Activation, PPARalpha<br>KE 482 Decreased, DHBA/HSD17B4<br>KE 451 Inhibition, Mitochondrial fatty acid beta-oxidation<br>KE 453 Activation, LXR alpha<br>KE 878 Inhibition, SREBP1c<br>KE 879 Activation, MTTP<br>KE 880 Increased, ApoB100<br>KE 881 Increased, Triglyceride<br>KE 458 Increased, De Novo FA synthesis                                                                                                                                                                                                                                                                                                                                                                                                                                                                                                                                                                                                                                                                                                                                                                                                                                                                                                                                               | AO 459 Increased, Liver Steatosis                                                                                                         | <a href="#">AOP#778-50-9.jpg</a>                                                                                                                                                                                                                                                                                                                                                                     |                                  |
| <a href="#">Research</a> |            |                                                |                                                                                                                                                                 | NFE2L2/PXR activation leading to hepatic steatosis                                                                                                                                                                                                                                                   |                                                                                                                                                                                                                         | ME 478 Activation, NFE2L2<br>ME 479 Activation, NR1H4                                                                                                                                                                                                                                                                                                                                                                                                                                                                  |                                                                                                                                                                                                                                                                                                                                                                                                                 | KE 655 Decreased testosterone by the fetal Leydig cells, Increased COUP-TFII in fetal Leydig cells<br>KE 656 Decreased number and function of adult Leydig cells, Decreased COUP-TFII in adult Leydig cells<br>KE 657 Decreased testosterone by the fetal Leydig cells, Dysgenesis of fetal Leydig cells                                                                                                                                                                                                                                                                                                                                                                                                                                                                                                                                                                                                                                                                                                                                                                                                                                                                                                                                                                                                                                                                                                                                                                                                           | AO 459 Increased, Liver Steatosis                                                                                                         | <a href="#">AOP#778-50-9.jpg</a>                                                                                                                                                                                                                                                                                                                                                                     |                                  |
| <a href="#">Research</a> |            |                                                |                                                                                                                                                                 | Modulation of Adult Leydig Cell Function Subsequent Glucocorticoid Activation in the Fetal Testis                                                                                                                                                                                                    |                                                                                                                                                                                                                         | ME 653 Decreased testosterone by the fetal Leydig cells, Increased corticosterone<br>ME 654 Decreased testosterone by the fetal Leydig cells, Activation by other glucocorticoid receptor agonists                                                                                                                                                                                                                                                                                                                     |                                                                                                                                                                                                                                                                                                                                                                                                                 | KE 655 Decreased testosterone by the fetal Leydig cells, Increased COUP-TFII in fetal Leydig cells<br>KE 656 Decreased number and function of adult Leydig cells, Decreased COUP-TFII in adult Leydig cells<br>KE 657 Decreased testosterone by the fetal Leydig cells, Dysgenesis of fetal Leydig cells                                                                                                                                                                                                                                                                                                                                                                                                                                                                                                                                                                                                                                                                                                                                                                                                                                                                                                                                                                                                                                                                                                                                                                                                           | AO 505 Decreased sperm quantity / quality in the adult, Decreased fertility                                                               | <a href="#">AOP#778-50-9.jpg</a>                                                                                                                                                                                                                                                                                                                                                                     |                                  |
| <a href="#">Research</a> |            |                                                |                                                                                                                                                                 | Constitutive androstane receptor activation leading to hepatocellular adenomas and carcinomas in the mouse and the rat                                                                                                                                                                               |                                                                                                                                                                                                                         | ME 715 Activation, Constitutive androstane receptor                                                                                                                                                                                                                                                                                                                                                                                                                                                                    |                                                                                                                                                                                                                                                                                                                                                                                                                 | KE 1214 Altered gene expression specific to CAR activation, Hepatocytes<br>KE 716 Increase, Mitogenic cell proliferation (hepatocytes)<br>KE 774 Increase, Preneoplastic foci (hepatocytes)                                                                                                                                                                                                                                                                                                                                                                                                                                                                                                                                                                                                                                                                                                                                                                                                                                                                                                                                                                                                                                                                                                                                                                                                                                                                                                                        | AO 719 Increase, Adenomas/carcinomas (hepatocellular)                                                                                     | <a href="#">AOP#778-50-9.jpg</a>                                                                                                                                                                                                                                                                                                                                                                     |                                  |
| <a href="#">Research</a> |            |                                                |                                                                                                                                                                 | Aromatase inhibition leading to Ovarian Inhibition and Decreased Fertility in Female Rats                                                                                                                                                                                                            |                                                                                                                                                                                                                         | ME 964 Inhibition of Aromatase Enzyme. Chemical exposure during critical window of estrous cycle between diestrus 2 and proestrus inhibits aromatase conversion of testosterone to estradiol                                                                                                                                                                                                                                                                                                                           |                                                                                                                                                                                                                                                                                                                                                                                                                 | KE 965 reduction in ovarian granulosa cells synthesis of estradiol, Reduced steroidogenic production of estradiol in granulosa cells<br>KE 966 Reduced Estradiol in Circulation, Reduced steroidogenic production of estradiol in granulosa cells leading to decreased estradiol in circulation<br>KE 967 Decreased positive estrogenic feedback on hypothalamus, Reduced estradiol in circulation decreases estrogen concentration at hypothalamus<br>KE 968 Decreased Kisspeptin release from neurons in AVPV, Decreased hypothalamic estrogen reduces kisspeptin neuron response<br>KE 969 Decreased GnRH Release, Decreased Kisspeptin stimulation of GnRH neurons<br>KE 970 Decreased LH release from Anterior Pituitary, Decreased GnRH stimulation of Anterior Pituitary Gonadotrophs<br>KE 971 Ovulation of oocytes Reduced, Delayed, or Blocked, Decrease or delay in LH surge-induced follicle ovulation                                                                                                                                                                                                                                                                                                                                                                                                                                                                                                                                                                                                 | AO 972 Decreased fertility, Reduced number of oocytes ovulated                                                                            | <a href="#">AOP#778-50-9.jpg</a>                                                                                                                                                                                                                                                                                                                                                                     |                                  |
| <a href="#">Research</a> |            |                                                |                                                                                                                                                                 | PPARgamma activation leading to sarcomas in rats, mice, and hamsters                                                                                                                                                                                                                                 |                                                                                                                                                                                                                         | ME 1028 Activation of specific nuclear receptors, PPAR-gamma activation                                                                                                                                                                                                                                                                                                                                                                                                                                                |                                                                                                                                                                                                                                                                                                                                                                                                                 | KE 1029 Increased, Adipogenesis<br>KE 1032 Increased, secretion of local growth factors<br>KE 1033 Increased, proliferation of mesenchymal cells<br>KE 1034 Increased, IGF-1 (mouse)<br>KE 1035 Increased, Fibrosarcoma<br>KE 1036 Increased, Liposarcoma<br>KE 1037 Increased, Hemangiosarcoma                                                                                                                                                                                                                                                                                                                                                                                                                                                                                                                                                                                                                                                                                                                                                                                                                                                                                                                                                                                                                                                                                                                                                                                                                    |                                                                                                                                           | <a href="#">AOP#778-50-9.jpg</a>                                                                                                                                                                                                                                                                                                                                                                     |                                  |
| <a href="#">Research</a> |            |                                                |                                                                                                                                                                 | Anticoagulant rodenticide inhibition of vitamin K epoxide reductase resulting coagulopathy and hemorrhage                                                                                                                                                                                            |                                                                                                                                                                                                                         | ME 1134 Irreversible inhibition of hepatic VKOR by binding of AR at tyrosine 139. Failure to cycle vitamin K epoxide to vitamin K to form vitamin K hydroquinone<br>ME 1138 Uncoupling of oxidative phosphorylation, Reduced ability to generate ATP<br>ME 1169 Anticoagulant rodenticide interferes with carboxylation of Gla proteins in bone. Impairment of post-translational modification (carboxylation) of osteocalcin                                                                                          |                                                                                                                                                                                                                                                                                                                                                                                                                 | KE 1122 Under carboxylated clotting factors will not assemble on cell surfaces to form clot, Failure of secondary hemostasis<br>KE 1130 Failure in vascular repair mechanisms, Unresolved blood loss (hemorrhage)<br>KE 1131 Failure in gamma-glutamyl carboxylation of clotting factors II, VII, IX and X. Under carboxylation of clotting factors (e.g., des-gamma-carboxy prothrombin)<br>KE 1132 Blood loss and development of anemia, Impaired oxygen delivery and nutrient delivery to tissue, Impaired carbon dioxide and waste product removal<br>KE 1133 Hemostasis, Depletion from blood of fully functional carboxylated clotting factors<br>KE 1135 Reduced fitness or even mortality, Acidosis, hypovolemic shock and organ dysfunction<br>KE 1151 Osteoporosis and vascular calcification, Bone deterioration                                                                                                                                                                                                                                                                                                                                                                                                                                                                                                                                                                                                                                                                                        | AO 1136 Impaired recruitment, Population trajectory                                                                                       | <a href="#">AOP#778-50-9.jpg</a>                                                                                                                                                                                                                                                                                                                                                                     |                                  |
| <a href="#">Research</a> |            |                                                |                                                                                                                                                                 | Estrogen receptor activation leading to breast cancer                                                                                                                                                                                                                                                |                                                                                                                                                                                                                         | ME 1181 Activation, Estrogen receptor                                                                                                                                                                                                                                                                                                                                                                                                                                                                                  |                                                                                                                                                                                                                                                                                                                                                                                                                 | KE 1182 Increase, Cell Proliferation (epithelial Cells)<br>KE 1183 Decreased, Apoptosis (Epithelial Cells)<br>KE 1177 N/A, Mitochondrial dysfunction 1<br>KE 1088 Increased, Oxidative Stress<br>KE 1187 Increased, ER binding to DNA (classical pathway)<br>KE 1188 Increased, ER binding to T.F. to DNA (non-classical pathway)<br>KE 1189 Increased, Proliferation (Endothelial cells)<br>KE 1190 Increased, Migration (Endothelial Cells)<br>KE 1191 Increased, Non-genomic signaling<br>KE 1192 Increased, Ductal Hyperplasia<br>KE 1194 Increase, DNA damage<br>KE 1195 modulation, Extracellular Matrix Composition<br>KE 1196 Increased, Invasion<br>KE 1197 Activation, Fibroblasts<br>KE 1198 Activation, Macrophages<br>KE 1213 Increased, Angiogenesis<br>KE 1239 Altered, Gene Expression<br>KE 1240 Altered, Protein Production<br>KE 1241 Increased, Motility<br>KE 1242 Increased, Survival<br>KE 585 Decreased, Sodium conductance 1                                                                                                                                                                                                                                                                                                                                                                                                                                                                                                                                                              | AO 1193 N/A, Breast Cancer                                                                                                                | <a href="#">AOP#778-50-9.jpg</a>                                                                                                                                                                                                                                                                                                                                                                     |                                  |
| <a href="#">Research</a> | 1110-58-1  | No AOPs available<br>95                        | <a href="https://comptox.epa.gov/dashboard/chemsearch?search=TX5020263#view=sum">https://comptox.epa.gov/dashboard/chemsearch?search=TX5020263#view=sum</a>     | 95 Ether-a-go-go (ERG) voltage-gated potassium channel inhibition leading to reduced survival                                                                                                                                                                                                        |                                                                                                                                                                                                                         | ME 593 Inhibition, Ether-a-go-go (ERG) voltage-gated potassium channel                                                                                                                                                                                                                                                                                                                                                                                                                                                 |                                                                                                                                                                                                                                                                                                                                                                                                                 | KE 586 Reduced swimming speed<br>KE 587 Reduced feeding<br>KE 588 Increased, predation                                                                                                                                                                                                                                                                                                                                                                                                                                                                                                                                                                                                                                                                                                                                                                                                                                                                                                                                                                                                                                                                                                                                                                                                                                                                                                                                                                                                                             | AO 592 Reduced, survival                                                                                                                  |                                                                                                                                                                                                                                                                                                                                                                                                      |                                  |
