# Supplementary material
Source: PubMed Central journal article supplement (PMC8097676)
Supplement: 13273_2021_139_MOESM2_ESM.pdf [file 13273_2021_139_MOESM2_ESM.pdf]

| Project ID | Project Name | Phase   | Task ID | Task Name   | Start Date | End Date   | Priority | Status      | Assignee                 | Dependencies | Resources | Notes                                      | Comments |
|------------|--------------|---------|---------|-------------|------------|------------|----------|-------------|--------------------------|--------------|-----------|--------------------------------------------|----------|
| 2023-001   | Project A    | Phase 1 | 1.1     | Task A.1.1  | 2023-01-01 | 2023-01-05 | High     | Completed   | John Doe                 | None         | 100%      | Task completed successfully.               |          |
| 2023-001   | Project A    | Phase 1 | 1.2     | Task A.1.2  | 2023-01-06 | 2023-01-10 | High     | In Progress | Jane Smith               | 1.1          | 80%       | Minor delays due to resource availability. |          |
| 2023-001   | Project A    | Phase 1 | 1.3     | Task A.1.3  | 2023-01-11 | 2023-01-15 | Medium   | Not Started | Mike Johnson             | 1.2          | 0%        | Awaiting start of task.                    |          |
| 2023-001   | Project A    | Phase 1 | 1.4     | Task A.1.4  | 2023-01-16 | 2023-01-20 | Medium   | Not Started | Sarah Lee                | 1.3          | 0%        | Awaiting start of task.                    |          |
| 2023-001   | Project A    | Phase 1 | 1.5     | Task A.1.5  | 2023-01-21 | 2023-01-25 | Medium   | Not Started | David Kim                | 1.4          | 0%        | Awaiting start of task.                    |          |
| 2023-001   | Project A    | Phase 1 | 1.6     | Task A.1.6  | 2023-01-26 | 2023-01-30 | Medium   | Not Started | Emily White              | 1.5          | 0%        | Awaiting start of task.                    |          |
| 2023-001   | Project A    | Phase 1 | 1.7     | Task A.1.7  | 2023-01-31 | 2023-02-03 | Medium   | Not Started | Chris Brown              | 1.6          | 0%        | Awaiting start of task.                    |          |
| 2023-001   | Project A    | Phase 1 | 1.8     | Task A.1.8  | 2023-02-04 | 2023-02-08 | Medium   | Not Started | Alex Green               | 1.7          | 0%        | Awaiting start of task.                    |          |
| 2023-001   | Project A    | Phase 1 | 1.9     | Task A.1.9  | 2023-02-09 | 2023-02-13 | Medium   | Not Started | Mia Black                | 1.8          | 0%        | Awaiting start of task.                    |          |
| 2023-001   | Project A    | Phase 1 | 1.10    | Task A.1.10 | 2023-02-14 | 2023-02-18 | Medium   | Not Started | Noah Gray                | 1.9          | 0%        | Awaiting start of task.                    |          |
| 2023-001   | Project A    | Phase 1 | 1.11    | Task A.1.11 | 2023-02-19 | 2023-02-23 | Medium   | Not Started | Liam Blue                | 1.10         | 0%        | Awaiting start of task.                    |          |
| 2023-001   | Project A    | Phase 1 | 1.12    | Task A.1.12 | 2023-02-24 | 2023-02-28 | Medium   | Not Started | Olivia Purple            | 1.11         | 0%        | Awaiting start of task.                    |          |
| 2023-001   | Project A    | Phase 1 | 1.13    | Task A.1.13 | 2023-02-29 | 2023-03-05 | Medium   | Not Started | Ethan Yellow             | 1.12         | 0%        | Awaiting start of task.                    |          |
| 2023-001   | Project A    | Phase 1 | 1.14    | Task A.1.14 | 2023-03-06 | 2023-03-10 | Medium   | Not Started | Ava Pink                 | 1.13         | 0%        | Awaiting start of task.                    |          |
| 2023-001   | Project A    | Phase 1 | 1.15    | Task A.1.15 | 2023-03-11 | 2023-03-15 | Medium   | Not Started | Lucas Orange             | 1.14         | 0%        | Awaiting start of task.                    |          |
| 2023-001   | Project A    | Phase 1 | 1.16    | Task A.1.16 | 2023-03-16 | 2023-03-20 | Medium   | Not Started | Isabella Light Blue      | 1.15         | 0%        | Awaiting start of task.                    |          |
| 2023-001   | Project A    | Phase 1 | 1.17    | Task A.1.17 | 2023-03-21 | 2023-03-25 | Medium   | Not Started | Mason Light Green        | 1.16         | 0%        | Awaiting start of task.                    |          |
| 2023-001   | Project A    | Phase 1 | 1.18    | Task A.1.18 | 2023-03-26 | 2023-03-30 | Medium   | Not Started | Sophia Light Purple      | 1.17         | 0%        | Awaiting start of task.                    |          |
| 2023-001   | Project A    | Phase 1 | 1.19    | Task A.1.19 | 2023-03-31 | 2023-04-04 | Medium   | Not Started | Benjamin Light Orange    | 1.18         | 0%        | Awaiting start of task.                    |          |
| 2023-001   | Project A    | Phase 1 | 1.20    | Task A.1.20 | 2023-04-05 | 2023-04-09 | Medium   | Not Started | Charlotte Light Pink     | 1.19         | 0%        | Awaiting start of task.                    |          |
| 2023-001   | Project A    | Phase 1 | 1.21    | Task A.1.21 | 2023-04-10 | 2023-04-14 | Medium   | Not Started | James Light Blue         | 1.20         | 0%        | Awaiting start of task.                    |          |
| 2023-001   | Project A    | Phase 1 | 1.22    | Task A.1.22 | 2023-04-15 | 2023-04-19 | Medium   | Not Started | Amelia Light Green       | 1.21         | 0%        | Awaiting start of task.                    |          |
| 2023-001   | Project A    | Phase 1 | 1.23    | Task A.1.23 | 2023-04-20 | 2023-04-24 | Medium   | Not Started | William Light Purple     | 1.22         | 0%        | Awaiting start of task.                    |          |
| 2023-001   | Project A    | Phase 1 | 1.24    | Task A.1.24 | 2023-04-25 | 2023-04-29 | Medium   | Not Started | Harper Light Orange      | 1.23         | 0%        | Awaiting start of task.                    |          |
| 2023-001   | Project A    | Phase 1 | 1.25    | Task A.1.25 | 2023-04-30 | 2023-05-04 | Medium   | Not Started | Evelyn Light Pink        | 1.24         | 0%        | Awaiting start of task.                    |          |
| 2023-001   | Project A    | Phase 1 | 1.26    | Task A.1.26 | 2023-05-05 | 2023-05-09 | Medium   | Not Started | Michael Light Blue       | 1.25         | 0%        | Awaiting start of task.                    |          |
| 2023-001   | Project A    | Phase 1 | 1.27    | Task A.1.27 | 2023-05-10 | 2023-05-14 | Medium   | Not Started | Madison Light Green      | 1.26         | 0%        | Awaiting start of task.                    |          |
| 2023-001   | Project A    | Phase 1 | 1.28    | Task A.1.28 | 2023-05-15 | 2023-05-19 | Medium   | Not Started | Christopher Light Purple | 1.27         | 0%        | Awaiting start of task.                    |          |
| 2023-001   | Project A    | Phase 1 | 1.29    | Task A.1.29 | 2023-05-20 | 2023-05-24 | Medium   | Not Started | Victoria Light Orange    | 1.28         | 0%        | Awaiting start of task.                    |          |
| 2023-001   | Project A    | Phase 1 | 1.30    | Task A.1.30 | 2023-05-25 | 2023-05-29 | Medium   | Not Started | Anthony Light Pink       | 1.29         | 0%        | Awaiting start of task.                    |          |
| 2023-001   | Project A    | Phase 1 | 1.31    | Task A.1.31 | 2023-05-30 | 2023-06-03 | Medium   | Not Started | Chloe Light Blue         | 1.30         | 0%        | Awaiting start of task.                    |          |
| 2023-001   | Project A    | Phase 1 | 1.32    | Task A.1.32 | 2023-06-04 | 2023-06-08 | Medium   | Not Started | Robert Light Green       | 1.31         | 0%        | Awaiting start of task.                    |          |
| 2023-001   | Project A    | Phase 1 | 1.33    | Task A.1.33 | 2023-06-09 | 2023-06-13 | Medium   | Not Started | Grace Light Purple       | 1.32         | 0%        | Awaiting start of task.                    |          |
| 2023-001   | Project A    | Phase 1 | 1.34    | Task A.1.34 | 2023-06-14 | 2023-06-18 | Medium   | Not Started | Kevin Light Orange       | 1.33         | 0%        | Awaiting start of task.                    |          |
| 2023-001   | Project A    | Phase 1 | 1.35    | Task A.1.35 | 2023-06-19 | 2023-06-23 | Medium   | Not Started | Oliver Light Pink        | 1.34         | 0%        | Awaiting start of task.                    |          |
| 2023-001   | Project A    | Phase 1 | 1.36    | Task A.1.36 | 2023-06-24 | 2023-06-28 | Medium   | Not Started | Quinn Light Blue         | 1.35         | 0%        | Awaiting start of task.                    |          |
| 2023-001   | Project A    | Phase 1 | 1.37    | Task A.1.37 | 2023-06-29 | 2023-07-03 | Medium   | Not Started | Samuel Light Green       | 1.36         | 0%        | Awaiting start of task.                    |          |
| 2023-001   | Project A    | Phase 1 | 1.38    | Task A.1.38 | 2023-07-04 | 2023-07-08 | Medium   | Not Started | Alexandra Light Purple   | 1.37         | 0%        | Awaiting start of task.                    |          |
| 2023-001   | Project A    | Phase 1 | 1.39    | Task A.1.39 | 2023-07-09 | 2023-07-13 | Medium   | Not Started | Isaac Light Orange       | 1.38         | 0%        | Awaiting start of task.                    |          |
| 2023-001   | Project A    | Phase 1 | 1.40    | Task A.1.40 | 2023-07-14 | 2023-07-18 | Medium   | Not Started | Madelyn Light Pink       | 1.39         | 0%        | Awaiting start of task.                    |          |
| 2023-001   | Project A    | Phase 1 | 1.41    | Task A.1.41 | 2023-07-19 | 2023-07-23 | Medium   | Not Started | Johnathan Light Blue     | 1.40         | 0%        | Awaiting start of task.                    |          |
| 2023-001   | Project A    | Phase 1 | 1.42    | Task A.1.42 | 2023-07-24 | 2023-07-28 | Medium   | Not Started | Abigail Light Green      | 1.41         | 0%        | Awaiting start of task.                    |          |
| 2023-001   | Project A    | Phase 1 | 1.43    | Task A.1.43 | 2023-07-29 | 2023-08-02 | Medium   | Not Started | Christopher Light Purple | 1.42         | 0%        | Awaiting start of task.                    |          |
| 2023-001   | Project A    | Phase 1 | 1.44    | Task A.1.44 | 2023-08-03 | 2023-08-07 | Medium   | Not Started | Victoria Light Orange    | 1.43         | 0%        | Awaiting start of task.                    |          |
| 2023-001   | Project A    | Phase 1 | 1.45    | Task A.1.45 | 2023-08-08 | 2023-08-12 | Medium   | Not Started | Anthony Light Pink       | 1.44         | 0%        | Awaiting start of task.                    |          |
| 2023-001   | Project A    | Phase 1 | 1.46    | Task A.1.46 | 2023-08-13 | 2023-08-17 | Medium   | Not Started | Chloe Light Blue         | 1.45         | 0%        | Awaiting start of task.                    |          |
| 2023-001   | Project A    | Phase 1 | 1.47    | Task A.1.47 | 2023-08-18 | 2023-08-22 | Medium   | Not Started | Robert Light Green       | 1.46         | 0%        | Awaiting start of task.                    |          |
| 2023-001   | Project A    | Phase 1 | 1.48    | Task A.1.48 | 2023-08-23 | 2023-08-27 | Medium   | Not Started | Grace Light Purple       | 1.47         | 0%        | Awaiting start of task.                    |          |
| 2023-001   | Project A    | Phase 1 | 1.49    | Task A.1.49 | 2023-08-28 | 2023-09-01 | Medium   | Not Started | Kevin Light Orange       | 1.48         | 0%        | Awaiting start of task.                    |          |
| 2023-001   | Project A    | Phase 1 | 1.50    | Task A.1.50 | 2023-09-02 | 2023-09-06 | Medium   | Not Started | Oliver Light Pink        | 1.49         | 0%        | Awaiting start of task.                    |          |
| 2023-001   | Project A    | Phase 1 | 1.51    | Task A.1.51 | 2023-09-07 | 2023-09-11 | Medium   | Not Started | Quinn Light Blue         | 1.50         | 0%        | Awaiting start of task.                    |          |
| 2023-001   | Project A    | Phase 1 | 1.52    | Task A.1.52 | 2023-09-12 | 2023-09-16 | Medium   | Not Started | Samuel Light Green       | 1.51         | 0%        | Awaiting start of task.                    |          |
| 2023-001   | Project A    | Phase 1 | 1.53    | Task A.1.53 | 2023-09-17 | 2023-09-21 | Medium   | Not Started | Alexandra Light Purple   | 1.52         | 0%        | Awaiting start of task.                    |          |
| 2023-001   | Project A    | Phase 1 | 1.54    | Task A.1.54 | 2023-09-22 | 2023-09-26 | Medium   | Not Started | Isaac Light Orange       | 1.53         | 0%        | Awaiting start of task.                    |          |
| 2023-001   | Project A    | Phase 1 | 1.55    | Task A.1.55 | 2023-09-27 | 2023-10-01 | Medium   | Not Started | Madelyn Light Pink       | 1.54         | 0%        | Awaiting start of task.                    |          |
| 2023-001   | Project A    | Phase 1 | 1.56    | Task A.1.56 | 2023-10-02 | 2023-10-06 | Medium   | Not Started | Johnathan Light Blue     | 1.55         | 0%        | Awaiting start of task.                    |          |
| 2023-001   | Project A    | Phase 1 | 1.57    | Task A.1.57 | 2023-10-07 | 2023-10-11 | Medium   | Not Started | Abigail Light Green      | 1.56         | 0%        | Awaiting start of task.                    |          |
| 2023-001   | Project A    | Phase 1 | 1.58    | Task A.1.58 | 2023-10-12 | 2023-10-16 | Medium   | Not Started | Christopher Light Purple | 1.57         | 0%        | Awaiting start of task.                    |          |
| 2023-001   | Project A    | Phase 1 | 1.59    | Task A.1.59 | 2023-10-17 | 2023-10-21 | Medium   | Not Started | Victoria Light Orange    | 1.58         | 0%        | Awaiting start of task.                    |          |
| 2023-001   | Project A    | Phase 1 | 1.60    | Task A.1.60 | 2023-10-22 | 2023-10-26 | Medium   | Not Started | Anthony Light Pink       | 1.59         | 0%        | Awaiting start of task.                    |          |
| 2023-001   | Project A    | Phase 1 | 1.61    | Task A.1.61 | 2023-10-27 | 2023-10-31 | Medium   | Not Started | Chloe Light Blue         | 1.60         | 0%        | Awaiting start of task.                    |          |
| 2023-001   | Project A    | Phase 1 | 1.62    | Task A.1.62 | 2023-11-01 | 2023-11-05 | Medium   | Not Started | Robert Light Green       | 1.61         | 0%        | Awaiting start of task.                    |          |
| 2023-001   | Project A    | Phase 1 | 1.63    | Task A.1.63 | 2023-11-06 | 2023-11-10 | Medium   | Not Started | Grace Light Purple       | 1.62         | 0%        | Awaiting start of task.                    |          |
| 2023-001   | Project A    | Phase 1 | 1.64    | Task A.1.64 | 2023-11-11 | 2023-11-15 | Medium   | Not Started | Kevin Light Orange       | 1.63         | 0%        | Awaiting start of task.                    |          |
| 2023-001   | Project A    | Phase 1 | 1.65    | Task A.1.65 | 2023-11-16 | 2023-11-20 | Medium   | Not Started | Oliver Light Pink        | 1.64         | 0%        | Awaiting start of task.                    |          |
| 2023-001   | Project A    | Phase 1 | 1.66    | Task A.1.66 | 2023-11-21 | 2023-11-25 | Medium   | Not Started | Quinn Light Blue         | 1.65         | 0%        | Awaiting start of task.                    |          |
| 2023-001   | Project A    | Phase 1 | 1.67    | Task A.1.67 | 2023-11-26 | 2023-11-30 | Medium   | Not Started | Samuel Light Green       | 1.66         | 0%        | Awaiting start of task.                    |          |
| 2023-001   | Project A    | Phase 1 | 1.68    | Task A.1.68 | 2023-12-01 | 2023-12-05 | Medium   | Not Started | Alexandra Light Purple   | 1.67         | 0%        | Awaiting start of task.                    |          |
| 2023-001   | Project A    | Phase 1 | 1.69    | Task A.1.69 | 2023-12-06 | 2023-12-10 | Medium   | Not Started | Isaac Light Orange       | 1.68         | 0%        | Awaiting start of task.                    |          |
| 2023-001   | Project A    | Phase 1 | 1.70    | Task A.1.70 | 2023-12-11 | 2023-12-15 | Medium   | Not Started | Madelyn Light Pink       | 1.69         | 0%        | Awaiting start of task.                    |          |
| 2023-001   | Project A    | Phase 1 | 1.71    | Task A.1.71 | 2023-12-16 | 2023-12-20 | Medium   | Not Started | Johnathan Light Blue     | 1.70         | 0%        | Awaiting start of task.                    |          |
| 2023-001   | Project A    | Phase 1 | 1.72    | Task A.1.72 | 2023-12-21 | 2023-12-25 | Medium   | Not Started | Abigail Light Green      | 1.71         | 0%        | Awaiting start of task.                    |          |
| 2023-001   | Project A    | Phase 1 | 1.73    | Task A.1.73 | 2023-12-26 | 2023-12-30 | Medium   | Not Started | Christopher Light Purple | 1.72         | 0%        | Awaiting start of task.                    |          |
| 2023-001   | Project A    | Phase 1 | 1.74    | Task A.1.74 | 2023-12-31 | 2024-01-04 | Medium   | Not Started | Victoria Light Orange    | 1.73         | 0%        | Awaiting start of task.                    |          |
| 2023-001   | Project A    | Phase 1 | 1.75    | Task A.1.75 | 2024-01-05 | 2024-01-09 | Medium   | Not Started | Anthony Light Pink       | 1.74         | 0%        | Awaiting start of task.                    |          |
| 2023-001   | Project A    | Phase 1 | 1.76    | Task A.1.76 | 2024-01-10 | 2024-01-14 | Medium   | Not Started | Chloe Light Blue         | 1.75         | 0%        | Awaiting start of task.                    |          |
| 2023-001   | Project A    | Phase 1 | 1.77    | Task A.1.77 | 2024-01-15 | 2024-01-19 | Medium   | Not Started | Robert Light Green       | 1.76         | 0%        | Awaiting start of task.                    |          |
| 2023-001   | Project A    | Phase 1 | 1.78    | Task A.1.78 | 2024-01-20 | 2024-01-24 | Medium   | Not Started | Grace Light Purple       | 1.77         | 0%        | Awaiting start of task.                    |          |
| 2023-001   | Project A    | Phase 1 | 1.79    | Task A.1.79 | 2024-01-25 | 2024-01-29 | Medium   | Not Started | Kevin Light Orange       | 1.78         | 0%        | Awaiting start of task.                    |          |
| 2023-001   | Project A    | Phase 1 | 1.80    | Task A.1.80 | 2024-01-30 | 2024-02-03 | Medium   | Not Started | Oliver Light Pink        | 1.79         | 0%        | Awaiting start of task.                    |          |
| 2023-001   | Project A    | Phase 1 | 1.81    | Task A.1.81 | 2024-02-04 | 2024-02-08 | Medium   | Not Started | Quinn Light Blue         | 1.80         | 0%        | Awaiting start of task.                    |          |
| 2023-001   | Project A    | Phase 1 | 1.82    | Task A.1.82 | 2024-02-09 | 2024-02-13 | Medium   | Not Started | Samuel Light Green       | 1.81         | 0%        | Awaiting start of task.                    |          |
| 2023-001   |              |         |         |             |            |            |          |             |                          |              |           |                                            |          |



| Project ID | Project Name | Start Date | End Date   | Phase   | Priority | Owner    | Manager    | Team   | Status       | Progress | Issues                               | Dependencies   | Resources  | Notes                                                     |
|------------|--------------|------------|------------|---------|----------|----------|------------|--------|--------------|----------|--------------------------------------|----------------|------------|-----------------------------------------------------------|
| 001        | Project A    | 2023-01-01 | 2023-03-31 | Phase 1 | High     | John Doe | Jane Smith | Team A | Completed    | 100%     | None                                 | None           | None       | Project A completed successfully.                         |
| 002        | Project B    | 2023-04-01 | 2023-06-30 | Phase 2 | Medium   | John Doe | Jane Smith | Team B | In Progress  | 75%      | 1 Critical, 2 High, 5 Medium, 10 Low | Task X, Task Y | Resource Z | Project B is behind schedule due to resource constraints. |
| 003        | Project C    | 2023-07-01 | 2023-09-30 | Phase 1 | Low      | John Doe | Jane Smith | Team C | On Hold      | 0%       | None                                 | None           | None       | Project C is on hold pending budget approval.             |
| 004        | Project D    | 2023-10-01 | 2023-12-31 | Phase 1 | High     | John Doe | Jane Smith | Team D | Planning     | 10%      | None                                 | None           | None       | Project D is in the planning phase.                       |
| 005        | Project E    | 2024-01-01 | 2024-03-31 | Phase 1 | Medium   | John Doe | Jane Smith | Team E | Initiation   | 5%       | None                                 | None           | None       | Project E is in the initiation phase.                     |
| 006        | Project F    | 2024-04-01 | 2024-06-30 | Phase 1 | High     | John Doe | Jane Smith | Team F | Analysis     | 20%      | None                                 | None           | None       | Project F is in the analysis phase.                       |
| 007        | Project G    | 2024-07-01 | 2024-09-30 | Phase 1 | Medium   | John Doe | Jane Smith | Team G | Design       | 15%      | None                                 | None           | None       | Project G is in the design phase.                         |
| 008        | Project H    | 2024-10-01 | 2024-12-31 | Phase 1 | Low      | John Doe | Jane Smith | Team H | Procurement  | 10%      | None                                 | None           | None       | Project H is in the procurement phase.                    |
| 009        | Project I    | 2025-01-01 | 2025-03-31 | Phase 1 | High     | John Doe | Jane Smith | Team I | Construction | 5%       | None                                 | None           | None       | Project I is in the construction phase.                   |
| 010        | Project J    | 2025-04-01 | 2025-06-30 | Phase 1 | Medium   | John Doe | Jane Smith | Team J | Testing      | 10%      | None                                 | None           | None       | Project J is in the testing phase.                        |
| 011        | Project K    | 2025-07-01 | 2025-09-30 | Phase 1 | Low      | John Doe | Jane Smith | Team K | Deployment   | 5%       | None                                 | None           | None       | Project K is in the deployment phase.                     |
| 012        | Project L    | 2025-10-01 | 2025-12-31 | Phase 1 | High     | John Doe | Jane Smith | Team L | Monitoring   | 10%      | None                                 | None           | None       | Project L is in the monitoring phase.                     |
| 013        | Project M    | 2026-01-01 | 2026-03-31 | Phase 1 | Medium   | John Doe | Jane Smith | Team M | Reporting    | 5%       | None                                 | None           | None       | Project M is in the reporting phase.                      |
| 014        | Project N    | 2026-04-01 | 2026-06-30 | Phase 1 | High     | John Doe | Jane Smith | Team N | Review       | 10%      | None                                 | None           | None       | Project N is in the review phase.                         |
| 015        | Project O    | 2026-07-01 | 2026-09-30 | Phase 1 | Low      | John Doe | Jane Smith | Team O | Final        | 5%       | None                                 | None           | None       | Project O is in the final phase.                          |
| 016        | Project P    | 2026-10-01 | 2026-12-31 | Phase 1 | High     | John Doe | Jane Smith | Team P | Archival     | 10%      | None                                 | None           | None       | Project P is in the archival phase.                       |



| Project ID | Project Name                                                                    | Start Date | End Date   | Phase       | Status      | Priority | Owner      | Responsible | Dependencies | Notes                                                                                                                                       | Comments                             | Attachments                              | Links                                |
|------------|---------------------------------------------------------------------------------|------------|------------|-------------|-------------|----------|------------|-------------|--------------|---------------------------------------------------------------------------------------------------------------------------------------------|--------------------------------------|------------------------------------------|--------------------------------------|
| 101        | Project A: Initial development and testing of the core system.                  | 2023-01-01 | 2023-03-31 | Development | Completed   | High     | John Doe   | Jane Smith  | None         | Project A completed successfully. All core modules are stable and ready for deployment.                                                     | Project A - Final Report             | Project A - Final Report.pdf             | Project A - Final Report             |
| 102        | Project B: Integration of third-party services and user interface enhancements. | 2023-04-01 | 2023-06-30 | Integration | In Progress | Medium   | Jane Smith | John Doe    | Project A    | Project B is currently in progress. Integration of third-party services is complete, and user interface enhancements are being implemented. | Project B - Progress Report          | Project B - Progress Report.pdf          | Project B - Progress Report          |
| 103        | Project C: Deployment and post-launch support.                                  | 2023-07-01 | 2023-09-30 | Deployment  | Planned     | High     | John Doe   | Jane Smith  | Project B    | Project C is planned for deployment in Q3 2023. Post-launch support is being organized.                                                     | Project C - Deployment Plan          | Project C - Deployment Plan.pdf          | Project C - Deployment Plan          |
| 104        | Project D: Security audit and performance optimization.                         | 2023-08-01 | 2023-10-31 | Security    | Planned     | High     | Jane Smith | John Doe    | Project C    | Project D is planned for security audit and performance optimization in Q4 2023.                                                            | Project D - Security Audit Plan      | Project D - Security Audit Plan.pdf      | Project D - Security Audit Plan      |
| 105        | Project E: User training and documentation.                                     | 2023-09-01 | 2023-11-30 | Training    | Planned     | Medium   | John Doe   | Jane Smith  | Project D    | Project E is planned for user training and documentation in Q4 2023.                                                                        | Project E - User Training Plan       | Project E - User Training Plan.pdf       | Project E - User Training Plan       |
| 106        | Project F: Final review and handover.                                           | 2023-12-01 | 2024-01-31 | Review      | Planned     | High     | Jane Smith | John Doe    | Project E    | Project F is planned for final review and handover in Q1 2024.                                                                              | Project F - Final Review Plan        | Project F - Final Review Plan.pdf        | Project F - Final Review Plan        |
| 107        | Project G: Post-launch monitoring and feedback.                                 | 2024-02-01 | 2024-03-31 | Monitoring  | Planned     | Medium   | John Doe   | Jane Smith  | Project F    | Project G is planned for post-launch monitoring and feedback in Q2 2024.                                                                    | Project G - Monitoring Plan          | Project G - Monitoring Plan.pdf          | Project G - Monitoring Plan          |
| 108        | Project H: System maintenance and updates.                                      | 2024-04-01 | 2024-06-30 | Maintenance | Planned     | Medium   | Jane Smith | John Doe    | Project G    | Project H is planned for system maintenance and updates in Q3 2024.                                                                         | Project H - Maintenance Plan         | Project H - Maintenance Plan.pdf         | Project H - Maintenance Plan         |
| 109        | Project I: New feature development.                                             | 2024-07-01 | 2024-09-30 | Development | Planned     | Medium   | John Doe   | Jane Smith  | Project H    | Project I is planned for new feature development in Q4 2024.                                                                                | Project I - Feature Development Plan | Project I - Feature Development Plan.pdf | Project I - Feature Development Plan |
| 110        | Project J: System expansion and scaling.                                        | 2024-10-01 | 2024-12-31 | Expansion   | Planned     | High     | Jane Smith | John Doe    | Project I    | Project J is planned for system expansion and scaling in Q1 2025.                                                                           | Project J - System Expansion Plan    | Project J - System Expansion Plan.pdf    | Project J - System Expansion Plan    |







| Project ID | Project Name                                 | Start Date | End Date   | Status      | Phase   | Lead         | Team         | Key Deliverables                                             | Dependencies | Risks  | Notes                                      |
|------------|----------------------------------------------|------------|------------|-------------|---------|--------------|--------------|--------------------------------------------------------------|--------------|--------|--------------------------------------------|
| 001        | Project A: Initial Setup                     | 2023-01-01 | 2023-01-31 | Completed   | Phase 1 | John Doe     | Team Alpha   | Initial setup, infrastructure, data migration.               | None         | Low    | Project completed successfully.            |
| 002        | Project B: Core Development                  | 2023-02-01 | 2023-03-31 | In Progress | Phase 2 | Jane Smith   | Team Beta    | Core development, API integration, testing.                  | Project A    | Medium | Minor delays in API integration.           |
| 003        | Project C: Deployment & Support              | 2023-04-01 | 2023-05-31 | Planned     | Phase 3 | Mike Johnson | Team Gamma   | Deployment, user training, ongoing support.                  | Project B    | Low    | Deployment scheduled for next week.        |
| 004        | Project D: Feature Enhancement               | 2023-06-01 | 2023-07-31 | On Hold     | Phase 4 | Sarah Lee    | Team Delta   | Feature enhancement, bug fixes, performance optimization.    | Project B    | High   | On hold due to resource constraints.       |
| 005        | Project E: Security Audit                    | 2023-08-01 | 2023-08-31 | Completed   | Phase 5 | David Kim    | Team Epsilon | Security audit, vulnerability assessment, patching.          | Project B    | Medium | Audit completed with no critical findings. |
| 006        | Project F: Integration with External Systems | 2023-09-01 | 2023-10-31 | In Progress | Phase 6 | Emily White  | Team Zeta    | Integration with external systems, data synchronization.     | Project B    | Medium | Integration testing in progress.           |
| 007        | Project G: User Acceptance Testing           | 2023-11-01 | 2023-11-30 | Planned     | Phase 7 | Frank Brown  | Team Eta     | User acceptance testing, final review, sign-off.             | Project B    | Low    | UAT scheduled for next month.              |
| 008        | Project H: Post-Launch Monitoring            | 2023-12-01 | Ongoing    | Phase 8     | Phase 8 | Grace Green  | Team Theta   | Post-launch monitoring, performance tracking, user feedback. | Project B    | Low    | Monitoring active, system stable.          |



| Project ID | Project Name                          | Start Date | End Date   | Phase   | Location | Lead         | Team         | Key Deliverables                                             | Dependencies                               | Risks  | Notes                                                                     |
|------------|---------------------------------------|------------|------------|---------|----------|--------------|--------------|--------------------------------------------------------------|--------------------------------------------|--------|---------------------------------------------------------------------------|
| 100-001    | Project A: Initial development phase  | 2023-01-01 | 2023-03-31 | Phase 1 | Region A | John Doe     | Team Alpha   | Requirements gathering, System architecture, Database design | None                                       | Low    | Initial phase of development, focus on requirements and architecture.     |
| 100-002    | Project B: System integration         | 2023-04-01 | 2023-06-30 | Phase 2 | Region B | Jane Smith   | Team Beta    | Integration of external services, API development, Testing   | Project A                                  | Medium | Integration phase, ensuring all external services are properly connected. |
| 100-003    | Project C: User interface development | 2023-07-01 | 2023-09-30 | Phase 3 | Region C | Mike Johnson | Team Gamma   | Frontend development, User experience design, Accessibility  | Project A, Project B                       | Low    | User interface development, focusing on usability and accessibility.      |
| 100-004    | Project D: Deployment and launch      | 2023-10-01 | 2023-12-31 | Phase 4 | Region D | Sarah Lee    | Team Delta   | Deployment planning, Go-live, Post-launch support            | Project A, Project B, Project C            | High   | Final phase: deployment and launch, ensuring a smooth transition.         |
| 100-005    | Project E: Maintenance and updates    | 2024-01-01 | Ongoing    | Phase 5 | Region E | David Kim    | Team Epsilon | Monitoring system performance, Bug fixes, Feature updates    | Project A, Project B, Project C, Project D | Low    | Ongoing maintenance and updates to keep the system current.               |





| Project ID | Project Name                                | Phase   | Start Date | End Date   | Priority | Status      | Owner    | Responsible | Dependencies | Resources | Risks  | Notes                                    |
|------------|---------------------------------------------|---------|------------|------------|----------|-------------|----------|-------------|--------------|-----------|--------|------------------------------------------|
| 1001       | Project A: Initial setup and infrastructure | Phase 1 | 2023-01-01 | 2023-03-31 | High     | Completed   | John Doe | Jane Smith  | None         | 10 FTE    | Low    | Project completed successfully.          |
| 1002       | Project B: Core system development          | Phase 2 | 2023-04-01 | 2023-06-30 | High     | In Progress | John Doe | Jane Smith  | Project A    | 15 FTE    | Medium | Minor delays due to resource allocation. |
| 1003       | Project C: Integration and testing          | Phase 3 | 2023-07-01 | 2023-09-30 | High     | Planned     | John Doe | Jane Smith  | Project B    | 10 FTE    | Low    | Waiting for final approvals.             |
| 1004       | Project D: Deployment and go-live           | Phase 4 | 2023-10-01 | 2023-12-31 | High     | Planned     | John Doe | Jane Smith  | Project C    | 5 FTE     | Low    | Final review and sign-off.               |
| 1005       | Project E: Post-launch support              | Phase 5 | 2024-01-01 | 2024-03-31 | Medium   | Planned     | John Doe | Jane Smith  | Project D    | 3 FTE     | Low    | Standard support period.                 |

| Project ID | Project Name                                      | Phase   | Start Date | End Date   | Priority | Owner         | Stakeholders                       | Dependencies            | Resources          | Risks         | Notes                                                              | Links               | Comments    |
|------------|---------------------------------------------------|---------|------------|------------|----------|---------------|------------------------------------|-------------------------|--------------------|---------------|--------------------------------------------------------------------|---------------------|-------------|
| 101        | Project A: Initial setup and planning             | Phase 1 | 2023-01-01 | 2023-01-31 | High     | John Doe      | Stakeholders: Client, Team, Vendor | Dependencies: None      | Resources: 5 FTEs  | Risks: Low    | Notes: Initial meeting with client to define scope and objectives. | Project A - Phase 1 | Completed   |
| 102        | Project B: Core development and testing           | Phase 2 | 2023-02-01 | 2023-03-31 | High     | Jane Smith    | Stakeholders: Client, Team, Vendor | Dependencies: Project A | Resources: 10 FTEs | Risks: Medium | Notes: Development of core features and initial testing.           | Project B - Phase 2 | In Progress |
| 103        | Project C: Deployment and post-launch support     | Phase 3 | 2023-04-01 | 2023-04-30 | High     | Mike Johnson  | Stakeholders: Client, Team, Vendor | Dependencies: Project B | Resources: 3 FTEs  | Risks: Low    | Notes: Deployment to production and ongoing support.               | Project C - Phase 3 | Completed   |
| 104        | Project D: Feature X development                  | Phase 1 | 2023-05-01 | 2023-06-30 | Medium   | Alice Brown   | Stakeholders: Client, Team         | Dependencies: Project B | Resources: 4 FTEs  | Risks: Medium | Notes: Development of new feature X.                               | Project D - Phase 1 | In Progress |
| 105        | Project E: Bug fixes and performance optimization | Phase 2 | 2023-07-01 | 2023-08-31 | Medium   | Bob White     | Stakeholders: Client, Team         | Dependencies: Project D | Resources: 3 FTEs  | Risks: Low    | Notes: Addressing bugs and optimizing performance.                 | Project E - Phase 2 | In Progress |
| 106        | Project F: Security audit and patching            | Phase 1 | 2023-09-01 | 2023-09-30 | High     | Charlie Green | Stakeholders: Client, Team, Vendor | Dependencies: Project E | Resources: 2 FTEs  | Risks: High   | Notes: Conducting a security audit and applying patches.           | Project F - Phase 1 | In Progress |
| 107        | Project G: User training and documentation        | Phase 1 | 2023-10-01 | 2023-10-31 | Medium   | Diana Prince  | Stakeholders: Client, Team         | Dependencies: Project F | Resources: 3 FTEs  | Risks: Low    | Notes: Preparing user training materials and documentation.        | Project G - Phase 1 | In Progress |
| 108        | Project H: Final review and handover              | Phase 2 | 2023-11-01 | 2023-11-30 | High     | Eve Black     | Stakeholders: Client, Team, Vendor | Dependencies: Project G | Resources: 4 FTEs  | Risks: Low    | Notes: Final review and handover to the client.                    | Project H - Phase 2 | In Progress |
| 109        | Project I: Post-project evaluation                | Phase 1 | 2023-12-01 | 2023-12-31 | Low      | Frank Blue    | Stakeholders: Client, Team         | Dependencies: Project H | Resources: 2 FTEs  | Risks: Low    | Notes: Evaluating the project's success and lessons learned.       | Project I - Phase 1 | In Progress |

| Project Name | Project ID | Start Date | End Date   | Phase    | Location | Client   | Contract Value | Contract Type | Contract Status | Contract Description   | Contract Documents   | Contract Terms   | Contract Conditions   | Contract Disputes   | Contract Dispute Resolution   |
|--------------|------------|------------|------------|----------|----------|----------|----------------|---------------|-----------------|------------------------|----------------------|------------------|-----------------------|---------------------|-------------------------------|
| Project 1    | 1001       | 2023-01-01 | 2023-03-31 | Phase 1  | London   | Client A | £1,000,000     | Fixed Price   | Completed       | Project 1 Description  | Project 1 Documents  | Project 1 Terms  | Project 1 Conditions  | Project 1 Disputes  | Project 1 Dispute Resolution  |
| Project 2    | 1002       | 2023-04-01 | 2023-06-30 | Phase 2  | London   | Client B | £2,000,000     | Fixed Price   | In Progress     | Project 2 Description  | Project 2 Documents  | Project 2 Terms  | Project 2 Conditions  | Project 2 Disputes  | Project 2 Dispute Resolution  |
| Project 3    | 1003       | 2023-07-01 | 2023-09-30 | Phase 3  | London   | Client C | £3,000,000     | Fixed Price   | Completed       | Project 3 Description  | Project 3 Documents  | Project 3 Terms  | Project 3 Conditions  | Project 3 Disputes  | Project 3 Dispute Resolution  |
| Project 4    | 1004       | 2023-10-01 | 2023-12-31 | Phase 4  | London   | Client D | £4,000,000     | Fixed Price   | In Progress     | Project 4 Description  | Project 4 Documents  | Project 4 Terms  | Project 4 Conditions  | Project 4 Disputes  | Project 4 Dispute Resolution  |
| Project 5    | 1005       | 2024-01-01 | 2024-03-31 | Phase 5  | London   | Client E | £5,000,000     | Fixed Price   | Completed       | Project 5 Description  | Project 5 Documents  | Project 5 Terms  | Project 5 Conditions  | Project 5 Disputes  | Project 5 Dispute Resolution  |
| Project 6    | 1006       | 2024-04-01 | 2024-06-30 | Phase 6  | London   | Client F | £6,000,000     | Fixed Price   | In Progress     | Project 6 Description  | Project 6 Documents  | Project 6 Terms  | Project 6 Conditions  | Project 6 Disputes  | Project 6 Dispute Resolution  |
| Project 7    | 1007       | 2024-07-01 | 2024-09-30 | Phase 7  | London   | Client G | £7,000,000     | Fixed Price   | Completed       | Project 7 Description  | Project 7 Documents  | Project 7 Terms  | Project 7 Conditions  | Project 7 Disputes  | Project 7 Dispute Resolution  |
| Project 8    | 1008       | 2024-10-01 | 2024-12-31 | Phase 8  | London   | Client H | £8,000,000     | Fixed Price   | In Progress     | Project 8 Description  | Project 8 Documents  | Project 8 Terms  | Project 8 Conditions  | Project 8 Disputes  | Project 8 Dispute Resolution  |
| Project 9    | 1009       | 2025-01-01 | 2025-03-31 | Phase 9  | London   | Client I | £9,000,000     | Fixed Price   | Completed       | Project 9 Description  | Project 9 Documents  | Project 9 Terms  | Project 9 Conditions  | Project 9 Disputes  | Project 9 Dispute Resolution  |
| Project 10   | 1010       | 2025-04-01 | 2025-06-30 | Phase 10 | London   | Client J | £10,000,000    | Fixed Price   | In Progress     | Project 10 Description | Project 10 Documents | Project 10 Terms | Project 10 Conditions | Project 10 Disputes | Project 10 Dispute Resolution |



| Project Name                            | Project ID | Phase   | Start Date | End Date   | Status      | Responsible Party | Key Deliverables                                                                    | Dependencies         | Risks  | Notes                                                       |
|-----------------------------------------|------------|---------|------------|------------|-------------|-------------------|-------------------------------------------------------------------------------------|----------------------|--------|-------------------------------------------------------------|
| Project A: System Upgrade               | 1001       | Phase 1 | 2023-01-01 | 2023-03-31 | Completed   | John Doe          | Requirement gathering, System design, Development, Testing, Deployment              | None                 | Low    | Project completed successfully on time and within budget.   |
| Project B: New Product Launch           | 1002       | Phase 2 | 2023-04-01 | 2023-06-30 | In Progress | Jane Smith        | Market research, Product development, Marketing strategy, Sales channel setup       | Project A completion | Medium | Marketing strategy is being finalized.                      |
| Project C: Infrastructure Upgrade       | 1003       | Phase 3 | 2023-07-01 | 2023-09-30 | On Hold     | Mike Johnson      | Hardware procurement, Network configuration, Security audit, Migration              | Project B completion | High   | Hardware procurement is delayed due to supply chain issues. |
| Project D: Customer Portal Redesign     | 1004       | Phase 1 | 2023-10-01 | 2024-01-31 | Planning    | Sarah Lee         | User requirements, Wireframes, Design system, Content strategy                      | None                 | Low    | Initial user requirements are being gathered.               |
| Project E: Data Analytics Platform      | 1005       | Phase 2 | 2023-11-01 | 2024-03-31 | Development | David Kim         | Data source integration, Platform development, Reporting tools, User interface      | Project D completion | Medium | Data source integration is in progress.                     |
| Project F: Mobile App Relaunch          | 1006       | Phase 3 | 2024-04-01 | 2024-06-30 | Testing     | Emily White       | App development, QA testing, User acceptance testing, App store submission          | Project E completion | Medium | QA testing is currently underway.                           |
| Project G: Internal Tool Automation     | 1007       | Phase 1 | 2024-07-01 | 2024-09-30 | Analysis    | Chris Brown       | Process mapping, Tool selection, Requirement gathering, Design                      | None                 | Low    | Process mapping is being completed.                         |
| Project H: Cloud Migration Phase 2      | 1008       | Phase 2 | 2024-10-01 | 2024-12-31 | Migration   | Alex Green        | Application migration, Data migration, Performance optimization, Security hardening | Project G completion | High   | Application migration is being initiated.                   |
| Project I: Compliance Audit Preparation | 1009       | Phase 1 | 2025-01-01 | 2025-03-31 | Preparation | Mia Black         | Policy review, Gap analysis, Remediation plan, Documentation                        | None                 | Medium | Policy review is being conducted.                           |
| Project J: AI Integration Pilot         | 1010       | Phase 2 | 2025-04-01 | 2025-06-30 | Pilot       | Noah Grey         | AI model selection, Integration, Pilot deployment, Evaluation                       | Project H completion | High   | AI model selection is in progress.                          |
