# Supplementary material
Source: PubMed Central journal article supplement (PMC8097676)
Supplement: 13273_2021_139_MOESM3_ESM.pdf [file 13273_2021_139_MOESM3_ESM.pdf]

| DTXSID   | PREFERRED_NAME               | CASRN       | INCHIKEY PAC_NAM | SMILES           | CHI_STR INULAR_FOERAGE_MASOTOPIC_TA_SOUROF_PUBMED DATA_SCOUNT (EPA CPDat) | In AOPWiki         | EPA Comptox | Cat. By information |     |       |       |        |                           |                                                                                                                                                                                   |        |
|----------|------------------------------|-------------|------------------|------------------|---------------------------------------------------------------------------|--------------------|-------------|---------------------|-----|-------|-------|--------|---------------------------|-----------------------------------------------------------------------------------------------------------------------------------------------------------------------------------|--------|
| DTXSID60 | (2E)-1,4-Dichlorobut-2-en    | 110-57-6    | FODIANV          | (2E)-1,4-DiClC=C | InChI=1S/C4H6Cl2                                                          | 124.99             | 123.9847    | 67                  | 11  | 89    | -     |        |                           |                                                                                                                                                                                   |        |
| DTXSID70 | 1-Nitronaphthalene           | 86-57-7     | RUKGJBP          | 1-Nitronap       | [O-][N+](=C                                                               | InChI=1S/C10H7NO   | 173.171     | 173.0477            | 74  | 11918 | 99    | -      |                           |                                                                                                                                                                                   |        |
| DTXSID30 | Indium(III) phosphide        | 22398-80-7  | GPXJNWS          | Indiganylid P    | [In]                                                                      | InChI=1S/InP       | 145.792     | 145.8776            | 43  | 135   | 29    | -      |                           |                                                                                                                                                                                   |        |
| DTXSID20 | Boron, trifluoride(tetrahydr | 462-34-0    | CHNLPLH          | Oxolane-ti       | FB(F)F.C1                                                                 | InChI=1S/C4H8BF3   | 139.91      | 140.062             | 15  | -     | 25    | -      |                           |                                                                                                                                                                                   |        |
| DTXSID10 | Silane, ethenyltrimethyl-    | 754-05-2    | GCSJLQS          | Ethenyl(tri      | C)S(C)C                                                                   | InChI=1S/C5H12Si   | 100.236     | 100.0708            | 26  | -     | 76    | -      |                           |                                                                                                                                                                                   |        |
| DTXSID40 | Arsenic pentafluoride        | 7784-36-3   | YBGKQGS          | Pentafluor       | F[As](F)F                                                                 | InChI=1S/AsF5      | 169.9136    | 169.9136            | 17  | 2     | 29    | -      |                           |                                                                                                                                                                                   |        |
| DTXSID70 | Phosphorus tribromide        | 7789-60-8   | IPNPIHIZV        | Phosphoro        | BrP(Br)Br                                                                 | InChI=1S/Br3P      | 270.686     | 267.7288            | 25  | -     | 54    | -      |                           |                                                                                                                                                                                   |        |
| DTXSID20 | Stannous oxide               | 21651-19-4  | QHGNHLZ          | lambda-2-        | O[Sn]                                                                     | InChI=1S/COSn      | 134.709     | 135.8971            | 22  | -     | 47    | -      |                           |                                                                                                                                                                                   |        |
| DTXSID40 | 1,3,5-Triazine, 2-[2-(4-me   | 42573-57-9  | MCNPOZI          | 2-[2-(4-Me       | COC1=CC                                                                   | InChI=1S/C14H9Cl6  | 447.95      | 444.8877            | 14  | -     | 34    | -      |                           |                                                                                                                                                                                   |        |
| DTXSID20 | 4,4'-Bis(chloromethyl)-1,    | 11667-10-3  | INZDTEIC         | 4,4'-Bis(ch      | ClC1C=CC                                                                  | InChI=1S/C14H12Cl2 | 251.15      | 250.0316            | 9   | -     | 69    | -      |                           |                                                                                                                                                                                   |        |
| DTXSID80 | Decaborane                   | 17702-41-9  | XAMMYYS-         | [H]B             | 1234                                                                      | InChI=1S/B10H14    | 122.21      | 124.2026            | 24  | -     | -     | -      |                           |                                                                                                                                                                                   |        |
| DTXSID10 | Pentaborane(9)               | 19624-22-7  | XPBKBKW-         | [H]B             | 123[E                                                                     | InChI=1S/B5H9      | 63.12       | 64.11695            | 18  | -     | -     | -      |                           |                                                                                                                                                                                   |        |
| DTXSID90 | Chlorine trifluoride         | 7790-91-2   | JOHWNGC          | Trifluoro-la     | F(C)F                                                                     | InChI=1S/ClF3      | 92.45       | 91.96406            | 14  | -     | -     | -      |                           |                                                                                                                                                                                   |        |
| DTXSID00 | Sodium hydroxide             | 1310-73-2   | HEMHJVS          | Sodium hy        | [OH-].[Na+                                                                | InChI=1S/NaO       | 39.997      | 39.99251            | 70  | 4394  | 203   | 725684 | No AOPs available         | <a href="https://comptox.epa.gov/dashboard/dsstoxdb/results?search=DTXSID0029634#exec_sum">https://comptox.epa.gov/dashboard/dsstoxdb/results?search=DTXSID0029634#exec_sum</a>   | Cat. 1 |
| DTXSID30 | Titanium dioxide             | 13463-67-7  | SOQBVB           | Bis(oxido)t      | [O-].[O-].[                                                               | InChI=1S/O2Ti      | 79.865      | 79.93777            | 67  | 9551  | 103   | 525888 | No AOPs available         | <a href="https://comptox.epa.gov/dashboard/dsstoxdb/results?search=DTXSID3021352#exec_sum">https://comptox.epa.gov/dashboard/dsstoxdb/results?search=DTXSID3021352#exec_sum</a>   | Cat. 1 |
| DTXSID90 | Ethanol                      | 64-17-5     | LFQSCWF          | Ethanol          | CCO                                                                       | InChI=1S/C2H6O     | 46.069      | 46.04186            | 149 | 79207 | 1591  | 318746 | No AOPs available         | <a href="https://comptox.epa.gov/dashboard/dsstoxdb/results?search=DTXSID9020584#exec_sum">https://comptox.epa.gov/dashboard/dsstoxdb/results?search=DTXSID9020584#exec_sum</a>   | Cat. 1 |
| DTXSID70 | Isopropanol                  | 67-63-0     | KFZMGEQ          | Propan-2-c       | CC(C)O                                                                    | InChI=1S/C3H8O     | 60.096      | 60.05751            | 147 | 1350  | 1267  | 276087 | AOP Links: 61, 153, 187   | <a href="https://comptox.epa.gov/dashboard/dsstoxdb/results?search=DTXSID7020762#exec_sum">https://comptox.epa.gov/dashboard/dsstoxdb/results?search=DTXSID7020762#exec_sum</a>   | Cat. 1 |
| DTXSID50 | Potassium hydroxide          | 1310-58-3   | KWYUFKZ          | Potassium        | [OH-].[K+]                                                                | InChI=1S/HKO       | 56.105      | 55.96645            | 67  | 818   | 135   | 78835  | No AOPs available         | <a href="https://comptox.epa.gov/dashboard/dsstoxdb/results?search=DTXSID5029633#exec_sum">https://comptox.epa.gov/dashboard/dsstoxdb/results?search=DTXSID5029633#exec_sum</a>   | Cat. 2 |
| DTXSID10 | Ethyl acetate                | 141-78-6    | XEKOWR\          | Ethyl aceta      | CCOC(C)                                                                   | InChI=1S/C4H8O2    | 88.106      | 88.05243            | 123 | 1327  | 720   | 56874  | AOP Links: 60, 200        | <a href="https://comptox.epa.gov/dashboard/dsstoxdb/results?search=DTXSID1022001#exec_sum">https://comptox.epa.gov/dashboard/dsstoxdb/results?search=DTXSID1022001#exec_sum</a>   | Cat. 2 |
| DTXSID70 | Zinc oxide                   | 1314-13-2   | RNWHGQ           | Zinc oxide       | [O-].[Zn+                                                                 | InChI=1S/OZn       | 81.38       | 79.92406            | 69  | 4856  | 78    | 41831  | No AOPs available         | <a href="https://comptox.epa.gov/dashboard/dsstoxdb/results?search=DTXSID7035016#exec_sum">https://comptox.epa.gov/dashboard/dsstoxdb/results?search=DTXSID7035016#exec_sum</a>   | Cat. 2 |
| DTXSID20 | Xylenes                      | 1330-20-7   | -                | -                | -                                                                         | -                  | -           | -                   | 107 | 3561  | -     | 40244  | No AOPs available         | <a href="https://comptox.epa.gov/dashboard/dsstoxdb/results?search=DTXSID2021464#exec_sum">https://comptox.epa.gov/dashboard/dsstoxdb/results?search=DTXSID2021464#exec_sum</a>   | Cat. 2 |
| DTXSID80 | Ethylene glycol              | 107-21-1    | LYCAIKOV         | Ethane-1,2       | OCCO                                                                      | InChI=1S/C2H6O2    | 62.068      | 62.03678            | 151 | 2300  | 6719  | 32115  | AOP Links: 187, 200       | <a href="https://comptox.epa.gov/dashboard/dsstoxdb/results?search=DTXSID8020597#exec_sum">https://comptox.epa.gov/dashboard/dsstoxdb/results?search=DTXSID8020597#exec_sum</a>   | Cat. 2 |
| DTXSID30 | Ethylbenzene                 | 100-41-4    | YNQLUTR          | Ethylbenze       | CCC1=CC                                                                   | InChI=1S/C8H10     | 106.168     | 106.0783            | 136 | 686   | 178   | 23875  | No AOPs available         | <a href="https://comptox.epa.gov/dashboard/dsstoxdb/results?search=DTXSID3020596#exec_sum">https://comptox.epa.gov/dashboard/dsstoxdb/results?search=DTXSID3020596#exec_sum</a>   | Cat. 2 |
| DTXSID20 | Hydrogen peroxide            | 7722-84-1   | MHAJPD           | Hydrogen         | OO                                                                        | InChI=1S/H2O2      | 34.014      | 34.00548            | 85  | 48012 | 272   | 14534  | No AOPs available         | <a href="https://comptox.epa.gov/dashboard/dsstoxdb/results?search=DTXSID2020715#exec_sum">https://comptox.epa.gov/dashboard/dsstoxdb/results?search=DTXSID2020715#exec_sum</a>   | Cat. 2 |
| DTXSID70 | Formaldehyde                 | 50-00-1     | WSFSSNL          | Formaldeh        | C=O                                                                       | InChI=1S/CH2O      | 30.026      | 30.01056            | 132 | 19234 | 207   | 14423  | No AOPs available         | <a href="https://comptox.epa.gov/dashboard/dsstoxdb/results?search=DTXSID7020637#exec_sum">https://comptox.epa.gov/dashboard/dsstoxdb/results?search=DTXSID7020637#exec_sum</a>   | Cat. 2 |
| DTXSID70 | Toluene                      | 108-88-3    | YXFVYABI         | Toluene          | CC1=CC=C                                                                  | InChI=1S/C7H8      | 92.141      | 92.0626             | 167 | 7662  | -     | 13887  | No AOPs available         | <a href="https://comptox.epa.gov/dashboard/dsstoxdb/results?search=DTXSID7021360#exec_sum">https://comptox.epa.gov/dashboard/dsstoxdb/results?search=DTXSID7021360#exec_sum</a>   | Cat. 2 |
| DTXSID90 | Hydrated silica              | 112926-00-8 | -                | -                | -                                                                         | -                  | -           | -                   | 19  | -     | -     | 12302  | No AOPs available         | <a href="https://comptox.epa.gov/dashboard/dsstoxdb/results?search=DTXSID9029851#exec_sum">https://comptox.epa.gov/dashboard/dsstoxdb/results?search=DTXSID9029851#exec_sum</a>   | Cat. 2 |
| DTXSID80 | Acetone                      | 67-64-1     | CSCPPAC          | Propan-2-c       | CC(C)=O                                                                   | InChI=1S/C3H6O     | 58.08       | 58.04186            | 136 | 7176  | 606   | 12025  | AOP Links: 187            | <a href="https://comptox.epa.gov/dashboard/dsstoxdb/results?search=DTXSID8021482#exec_sum">https://comptox.epa.gov/dashboard/dsstoxdb/results?search=DTXSID8021482#exec_sum</a>   | Cat. 2 |
| DTXSID70 | Carbon black                 | 1333-86-4   | -                | -                | -                                                                         | -                  | -           | -                   | 48  | 986   | -     | 8816   | No AOPs available         | <a href="https://comptox.epa.gov/dashboard/dsstoxdb/results?search=DTXSID7051216#exec_sum">https://comptox.epa.gov/dashboard/dsstoxdb/results?search=DTXSID7051216#exec_sum</a>   | Cat. 3 |
| DTXSID50 | Acetic acid                  | 64-19-7     | QTBSBXV          | Acetic acid      | CC(=O)O                                                                   | InChI=1S/C2H4O2    | 60.052      | 60.02113            | 134 | 8651  | 5297  | 8572   | AOP Links: 36             | <a href="https://comptox.epa.gov/dashboard/dsstoxdb/results?search=DTXSID5024394#exec_sum">https://comptox.epa.gov/dashboard/dsstoxdb/results?search=DTXSID5024394#exec_sum</a>   | Cat. 3 |
| DTXSID10 | Silica                       | 7631-86-9   | VYPSYNU          | Silanedio        | O=[Si]=O                                                                  | InChI=1S/O2Si      | 60.083      | 59.96676            | 82  | 2864  | 513   | 8398   | AOP Links: 187            | <a href="https://comptox.epa.gov/dashboard/dsstoxdb/results?search=DTXSID1029677#exec_sum">https://comptox.epa.gov/dashboard/dsstoxdb/results?search=DTXSID1029677#exec_sum</a>   | Cat. 3 |
| DTXSID20 | Methanol                     | 67-56-1     | OKKJLVB          | Methanol         | CO                                                                        | InChI=1S/CH4O      | 32.042      | 32.02621            | 142 | 14436 | 1691  | 5807   | No AOPs available         | <a href="https://comptox.epa.gov/dashboard/dsstoxdb/results?search=DTXSID2021731#exec_sum">https://comptox.epa.gov/dashboard/dsstoxdb/results?search=DTXSID2021731#exec_sum</a>   | Cat. 3 |
| DTXSID90 | Diammonium peroxydisul       | 7727-54-0   | ROOXNKN          | Bisammon         | [NH4+].[NH                                                                | InChI=1S/H8N2O8S2  | 228.19      | 227.9722            | 60  | 152   | 47    | 2350   | No AOPs available         | <a href="https://comptox.epa.gov/dashboard/dsstoxdb/results?search=DTXSID9029691#exec_sum">https://comptox.epa.gov/dashboard/dsstoxdb/results?search=DTXSID9029691#exec_sum</a>   | Cat. 3 |
| DTXSID30 | Butyl acetate                | 123-86-4    | DKPFZGU          | Butyl aceta      | CCCCOC                                                                    | InChI=1S/C6H12O2   | 116.16      | 116.0837            | 108 | 120   | 186   | 1541   | AOP Links: 124            | <a href="https://comptox.epa.gov/dashboard/dsstoxdb/results?search=DTXSID3021982#exec_sum">https://comptox.epa.gov/dashboard/dsstoxdb/results?search=DTXSID3021982#exec_sum</a>   | Cat. 3 |
| DTXSID20 | Zinc chloride                | 7646-85-7   | JIAARYAF         | Zinc dichlo      | [Cl-].[Cl-].[                                                             | InChI=1S/Cl2Zn     | 136.28      | 133.8668            | 80  | 1294  | 51    | 1309   | AOP Links: 58, 60, 61, 66 | <a href="https://comptox.epa.gov/dashboard/dsstoxdb/results?search=DTXSID20235013#exec_sum">https://comptox.epa.gov/dashboard/dsstoxdb/results?search=DTXSID20235013#exec_sum</a> | Cat. 3 |
| DTXSID90 | 5-Chloro-2-methyl-3(2H)-     | 26172-55-4  | DHNRXBZ          | 5-Chloro-2       | CN1SC(Cl                                                                  | InChI=1S/C4H4ClNC  | 149.59      | 148.9702            | 87  | 160   | 84    | 1279   | AOP Links: 60, 150, 187   | <a href="https://comptox.epa.gov/dashboard/dsstoxdb/results?search=DTXSID9034286#exec_sum">https://comptox.epa.gov/dashboard/dsstoxdb/results?search=DTXSID9034286#exec_sum</a>   | Cat. 3 |
| DTXSID30 | Quartz-alpha (SiO2)          | 14808-60-7  | -                | -                | -                                                                         | -                  | -           | -                   | 43  | 3121  | -     | 897    | No AOPs available         | <a href="https://comptox.epa.gov/dashboard/dsstoxdb/results?search=DTXSID3032040#exec_sum">https://comptox.epa.gov/dashboard/dsstoxdb/results?search=DTXSID3032040#exec_sum</a>   | Cat. 4 |
| DTXSID60 | Heptane                      | 142-82-5    | IMNFDUF          | Heptane          | CCCCCCC                                                                   | InChI=1S/C7H16     | 100.205     | 100.1252            | 97  | 146   | 497   | 885    | AOP Links: 187            | <a href="https://comptox.epa.gov/dashboard/dsstoxdb/results?search=DTXSID6024127#exec_sum">https://comptox.epa.gov/dashboard/dsstoxdb/results?search=DTXSID6024127#exec_sum</a>   | Cat. 4 |
| DTXSID80 | 2-(2-Butoxyethoxy)ethanc     | 112-34-5    | OAYXUHP          | 2-(2-Butox       | CCCCOCC                                                                   | InChI=1S/C8H18O3   | 162.229     | 162.1256            | 113 | 19    | 95    | 875    | AOP Links: 153, 200       | <a href="https://comptox.epa.gov/dashboard/dsstoxdb/results?search=DTXSID8021519#exec_sum">https://comptox.epa.gov/dashboard/dsstoxdb/results?search=DTXSID8021519#exec_sum</a>   | Cat. 4 |
| DTXSID10 | 2-Butoxyethanol              | 111-76-2    | POAOYU-          | 2-Butoxyet       | CCCCOCC                                                                   | InChI=1S/C6H14O2   | 118.176     | 118.0994            | 132 | 169   | 118   | 875    | AOP Links: 58, 200        | <a href="https://comptox.epa.gov/dashboard/dsstoxdb/results?search=DTXSID1024097#exec_sum">https://comptox.epa.gov/dashboard/dsstoxdb/results?search=DTXSID1024097#exec_sum</a>   | Cat. 4 |
| DTXSID50 | Phosphoric acid              | 7664-38-2   | NBIXXVU          | Phosphoric       | OP(O)(O)=                                                                 | InChI=1S/H3O4P     | 97.994      | 97.9769             | 98  | 2053  | 4626  | 862    | AOP Links: 187            | <a href="https://comptox.epa.gov/dashboard/dsstoxdb/results?search=DTXSID5024263#exec_sum">https://comptox.epa.gov/dashboard/dsstoxdb/results?search=DTXSID5024263#exec_sum</a>   | Cat. 4 |
| DTXSID60 | Ethanolamine                 | 141-43-5    | HZAXFHJ          | 2-Aminoet        | NCCO                                                                      | InChI=1S/C2H7NO    | 61.084      | 61.05276            | 124 | 1018  | 190   | 810    | No AOPs available         | <a href="https://comptox.epa.gov/dashboard/dsstoxdb/results?search=DTXSID602000#exec_sum">https://comptox.epa.gov/dashboard/dsstoxdb/results?search=DTXSID602000#exec_sum</a>     | Cat. 4 |
| DTXSID00 | Ethyl 3-ethoxypropionate     | 763-69-9    | BHXIWIUJ         | Ethyl 3-eth      | CCOCCC(C                                                                  | InChI=1S/C7H14O3   | 146.186     | 146.0943            | 64  | 2     | 80    | 791    | No AOPs available         | <a href="https://comptox.epa.gov/dashboard/dsstoxdb/results?search=DTXSID0027309#exec_sum">https://comptox.epa.gov/dashboard/dsstoxdb/results?search=DTXSID0027309#exec_sum</a>   | Cat. 4 |
| DTXSID00 | Dichloromethane              | 75-09-2     | YMWUJEA          | Dichlorome       | CClCl                                                                     | InChI=1S/CH2Cl2    | 84.93       | 83.95336            | 142 | 1755  | -     | 760    | No AOPs available         | <a href="https://comptox.epa.gov/dashboard/dsstoxdb/results?search=DTXSID0020868#exec_sum">https://comptox.epa.gov/dashboard/dsstoxdb/results?search=DTXSID0020868#exec_sum</a>   | Cat. 4 |
| DTXSID30 | Benzene                      | 71-43-2     | UHOVQNZ          | Benzene          | C1=CC=C                                                                   | InChI=1S/C6H6      | 78.114      | 78.04695            | 150 | 8535  | 510   | 757    | No AOPs available         | <a href="https://comptox.epa.gov/dashboard/dsstoxdb/results?search=DTXSID3039242#exec_sum">https://comptox.epa.gov/dashboard/dsstoxdb/results?search=DTXSID3039242#exec_sum</a>   | Cat. 4 |
| DTXSID10 | 1-Butanol                    | 71-36-3     | LRHPLDY          | Butan-1-ol       | CCCCO                                                                     | InChI=1S/C4H10O    | 74.123      | 74.07316            | 144 | 1109  | 407   | 725    | AOP Links: 200            | <a href="https://comptox.epa.gov/dashboard/dsstoxdb/results?search=DTXSID1021740#exec_sum">https://comptox.epa.gov/dashboard/dsstoxdb/results?search=DTXSID1021740#exec_sum</a>   | Cat. 4 |
| DTXSID30 | Methyl ethyl ketone          | 78-93-3     | ZWEHKNF          | Butan-2-ol       | CCC(C)=O                                                                  | InChI=1S/C4H8O     | 72.107      | 72.05751            | 136 | 333   | 317   | 717    | No AOPs available         | <a href="https://comptox.epa.gov/dashboard/dsstoxdb/results?search=DTXSID3021516#exec_sum">https://comptox.epa.gov/dashboard/dsstoxdb/results?search=DTXSID3021516#exec_sum</a>   | Cat. 4 |
| DTXSID80 | 1-Methoxy-2-propanol         | 107-98-2    | ARXJGSR          | 1-Methoxy        | COC(C)C                                                                   | InChI=1S/C4H10O2   | 90.122      | 90.06808            | 100 | 53    | 106   | 682    | AOP Links: 200            | <a href="https://comptox.epa.gov/dashboard/dsstoxdb/results?search=DTXSID8024284#exec_sum">https://comptox.epa.gov/dashboard/dsstoxdb/results?search=DTXSID8024284#exec_sum</a>   | Cat. 4 |
| DTXSID50 | Sulfuric acid                | 7664-93-9   | QAOWNC           | Sulfuric aci     | OS(O)(=O)                                                                 | InChI=1S/H2O4S     | 98.07       | 97.96738            | 88  | 2026  | 15271 | 641    | No AOPs available         | <a href="https://comptox.epa.gov/dashboard/dsstoxdb/results?search=DTXSID5029683#exec_sum">https://comptox.epa.gov/dashboard/dsstoxdb/results?search=DTXSID5029683#exec_sum</a>   | Cat. 4 |
| DTXSID10 | Ethylene                     | 74-85-1     | VGGSQFL          | Ethene           | C=C                                                                       | InChI=1S/C2H4      | 28.054      | 28.0313             | 78  | 4170  | 162   | 630    | No AOPs available         | <a href="https://comptox.epa.gov/dashboard/dsstoxdb/results?search=DTXSID1026378#exec_sum">https://comptox.epa.gov/dashboard/dsstoxdb/results?search=DTXSID1026378#exec_sum</a>   | Cat. 4 |
| DTXSID20 | Hydrochloric acid            | 7647-01-0   | VEZXGXH          | Hydrogen         | rCl                                                                       | InChI=1S/ClH       | 36.46       | 35.97668            | 85  | 7427  | 235   | 602    | No AOPs available         | <a href="https://comptox.epa.gov/dashboard/dsstoxdb/results?search=DTXSID2020711#exec_sum">https://comptox.epa.gov/dashboard/dsstoxdb/results?search=DTXSID2020711#exec_sum</a>   | Cat. 4 |
| DTXSID20 | 2-(2-Ethoxyethoxy)ethanc     | 111-90-0    | XXJWXES          | 2-(2-Ethox       | CCOCCOCC                                                                  | InChI=1S/C6H14O3   | 134.175     | 134.0943            | 104 | 129   | 193   | 589    | AOP Links: 58             | <a href="https://comptox.epa.gov/dashboard/dsstoxdb/results?search=DTXSID2021941#exec_sum">https://comptox.epa.gov/dashboard/dsstoxdb/results?search=DTXSID2021941#exec_sum</a>   | Cat. 4 |
| DTXSID10 | 1-Methoxy-2-propyl aceta     | 108-65-6    | LLHKCFN          | 1-Methoxy        | COC(C)C                                                                   | InChI=1S/C6H12O3   | 132.159     | 132.0786            | 77  | 6     | 77    | 581    | AOP Links: 150, 187       | <a href="https://comptox.epa.gov/dashboard/dsstoxdb/results?search=DTXSID1026796#exec_sum">https://comptox.epa.gov/dashboard/dsstoxdb/results?search=DTXSID1026796#exec_sum</a>   | Cat. 4 |
| DTXSID30 | Aluminum                     | 7429-90-5   | XAGFODP          | Aluminium        | [Al]                                                                      | InChI=1S/Al        | 26.98154    | 26.98154            | 90  | 15816 | -     | 564    | No AOPs available         | <a href="https://comptox.epa.gov/dashboard/dsstoxdb/results?search=DTXSID3040273#exec_sum">https://comptox.epa.gov/dashboard/dsstoxdb/results?search=DTXSID3040273#exec_sum</a>   | Cat. 4 |
| DTXSID50 | Phenol                       | 108-95-2    | ISWSDIO          | Phenol           | OC1=CC=C                                                                  | InChI=1S/C6H6O     | 94.113      | 94.04186            | 179 | 4884  | 471   | 561    | AOP Links: 58, 200        | <a href="https://comptox.epa.gov/dashboard/dsstoxdb/results?search=DTXSID5021124#exec_sum">https://comptox.epa.gov/dashboard/dsstoxdb/results?search=DTXSID5021124#exec_sum</a>   | Cat. 4 |
| DTXSID40 | Poloxalene                   | 9003-11-6   | -                | -                |                                                                           |                    |             |                     |     |       |       |        |                           |                                                                                                                                                                                   |        |



|          |                             |             |                                 |                     |          |          |     |       |     |    |                            |                                                                                                                                                                                 |       |
|----------|-----------------------------|-------------|---------------------------------|---------------------|----------|----------|-----|-------|-----|----|----------------------------|---------------------------------------------------------------------------------------------------------------------------------------------------------------------------------|-------|
| DTXSID70 | Nickel (II) oxide           | 1313-99-1   | GNRSAWL (Oxido)nick O=[Ni]      | InChI=1S/ NiO       | 74.692   | 73.93026 | 42  | 359   | 48  | 68 | No AOPs available          | <a href="https://comptox.epa.gov/dashboard/dsstoxdb/results?search=DTXSID7025710#exec_sum">https://comptox.epa.gov/dashboard/dsstoxdb/results?search=DTXSID7025710#exec_sum</a> | Cat 6 |
| DTXSID50 | Propargyl alcohol           | 107-19-7    | TVDSBUO Prop-2-yn- OCC#C        | InChI=1S/ C3H4O     | 56.064   | 56.02621 | 98  | 232   | 79  | 65 | AOP Links: 177             | <a href="https://comptox.epa.gov/dashboard/dsstoxdb/results?search=DTXSID5021883#exec_sum">https://comptox.epa.gov/dashboard/dsstoxdb/results?search=DTXSID5021883#exec_sum</a> | Cat 6 |
| DTXSID90 | Ethylene glycol monoether   | 111-15-9    | SVONRAP 2-Ethoxyet COCCOCC      | InChI=1S/ C6H12O3   | 132.159  | 132.0786 | 110 | 24    | 83  | 64 | AOP Links: 60              | <a href="https://comptox.epa.gov/dashboard/dsstoxdb/results?search=DTXSID9021928#exec_sum">https://comptox.epa.gov/dashboard/dsstoxdb/results?search=DTXSID9021928#exec_sum</a> | Cat 6 |
| DTXSID10 | Butyl ether                 | 142-96-1    | DURPTKY 1-Butoxyb. CCCCOCC      | InChI=1S/ C8H18O    | 130.231  | 130.1358 | 87  | 4     | 103 | 64 | No AOPs available          | <a href="https://comptox.epa.gov/dashboard/dsstoxdb/results?search=DTXSID1022007#exec_sum">https://comptox.epa.gov/dashboard/dsstoxdb/results?search=DTXSID1022007#exec_sum</a> | Cat 6 |
| DTXSID10 | Aluminum phosphide          | 20859-73-8  | PGCGUUC- [Al-3].[P-3]           | InChI=1S/ AlP       | 57.9553  | 57.9553  | 44  | 233   | -   | 63 | No AOPs available          | <a href="https://comptox.epa.gov/dashboard/dsstoxdb/results?search=DTXSID1023867#exec_sum">https://comptox.epa.gov/dashboard/dsstoxdb/results?search=DTXSID1023867#exec_sum</a> | Cat 6 |
| DTXSID70 | Acetonitrile                | 75-05-8     | WEVYAHX Acetonitrile CC#N       | InChI=1S/ C2H3N     | 41.053   | 41.02655 | 117 | 3174  | 877 | 59 | No AOPs available          | <a href="https://comptox.epa.gov/dashboard/dsstoxdb/results?search=DTXSID7020009#exec_sum">https://comptox.epa.gov/dashboard/dsstoxdb/results?search=DTXSID7020009#exec_sum</a> | Cat 6 |
| DTXSID60 | 2-(2-Aminoethoxy)ethano     | 929-06-6    | GIAFURW. 2-(2-Aminc NCCOCCO     | InChI=1S/ C4H11NO   | 105.137  | 105.079  | 64  | 4     | 81  | 59 | AOP Links: 107             | <a href="https://comptox.epa.gov/dashboard/dsstoxdb/results?search=DTXSID6027341#exec_sum">https://comptox.epa.gov/dashboard/dsstoxdb/results?search=DTXSID6027341#exec_sum</a> | Cat 6 |
| DTXSID30 | Boron                       | 7440-42-8   | ZOXJGFHl Boron [B]              | InChI=1S/ B         | 10.81    | 11.00931 | 67  | 3232  | -   | 58 | No AOPs available          | <a href="https://comptox.epa.gov/dashboard/dsstoxdb/results?search=DTXSID3023922#exec_sum">https://comptox.epa.gov/dashboard/dsstoxdb/results?search=DTXSID3023922#exec_sum</a> | Cat 6 |
| DTXSID60 | 2-(2-Ethoxyethoxy)ethyl a   | 112-15-2    | FPZWZCV. 2-(2-Ethox. COCCOCC    | InChI=1S/ C8H16O4   | 176.212  | 176.1049 | 67  | -     | 67  | 58 | No AOPs available          | <a href="https://comptox.epa.gov/dashboard/dsstoxdb/results?search=DTXSID6026905#exec_sum">https://comptox.epa.gov/dashboard/dsstoxdb/results?search=DTXSID6026905#exec_sum</a> | Cat 6 |
| DTXSID80 | o-Cresol                    | 95-48-7     | QWVGKY. 2-Methylph. CC1=C(O)    | InChI=1S/ C7H8O     | 108.14   | 108.0575 | 130 | 184   | 182 | 57 | AOP Links: 61              | <a href="https://comptox.epa.gov/dashboard/dsstoxdb/results?search=DTXSID8021808#exec_sum">https://comptox.epa.gov/dashboard/dsstoxdb/results?search=DTXSID8021808#exec_sum</a> | Cat 6 |
| DTXSID10 | Phosphorus                  | 7723-14-0   | OAICVXFJ Phosphoru [P]          | InChI=1S/ P         | 30.97376 | 30.97376 | 74  | 37055 | -   | 57 | No AOPs available          | <a href="https://comptox.epa.gov/dashboard/dsstoxdb/results?search=DTXSID1024382#exec_sum">https://comptox.epa.gov/dashboard/dsstoxdb/results?search=DTXSID1024382#exec_sum</a> | Cat 6 |
| DTXSID90 | Arsenic oxide (As2O3)       | 1327-53-3   | QTLQKAJ-. [O-].[O-].[           | InChI=1S/ As2O3     | 197.84   | 197.8279 | 67  | 2384  | 16  | 56 | AOP Links: 187, 200        | <a href="https://comptox.epa.gov/dashboard/dsstoxdb/results?search=DTXSID9020103#exec_sum">https://comptox.epa.gov/dashboard/dsstoxdb/results?search=DTXSID9020103#exec_sum</a> | Cat 6 |
| DTXSID60 | Ethyne                      | 74-86-2     | HSFWRNC Acetylene C#C           | InChI=1S/ C2H2      | 26.038   | 26.01565 | 65  | 2640  | 153 | 55 | No AOPs available          | <a href="https://comptox.epa.gov/dashboard/dsstoxdb/results?search=DTXSID6026379#exec_sum">https://comptox.epa.gov/dashboard/dsstoxdb/results?search=DTXSID6026379#exec_sum</a> | Cat 6 |
| DTXSID30 | Hydrazine                   | 302-01-2    | OAKJQA Hydrazine NN             | InChI=1S/ H4N2      | 32.046   | 32.03745 | 86  | 36436 | 68  | 54 | No AOPs available          | <a href="https://comptox.epa.gov/dashboard/dsstoxdb/results?search=DTXSID302702#exec_sum">https://comptox.epa.gov/dashboard/dsstoxdb/results?search=DTXSID302702#exec_sum</a>   | Cat 6 |
| DTXSID10 | Piperazine                  | 110-85-0    | GLUUGHF Piperazine C1CNCCN      | InChI=1S/ C4H10N2   | 86.138   | 86.0844  | 96  | 815   | 369 | 53 | AOP Links: 107, 187, 200   | <a href="https://comptox.epa.gov/dashboard/dsstoxdb/results?search=DTXSID1021164#exec_sum">https://comptox.epa.gov/dashboard/dsstoxdb/results?search=DTXSID1021164#exec_sum</a> | Cat 6 |
| DTXSID50 | 1-Propene                   | 115-07-1    | QQONPFF Prop-1-ene CC=C         | InChI=1S/ C3H6      | 42.081   | 42.04695 | 77  | 423   | 207 | 53 | No AOPs available          | <a href="https://comptox.epa.gov/dashboard/dsstoxdb/results?search=DTXSID5021205#exec_sum">https://comptox.epa.gov/dashboard/dsstoxdb/results?search=DTXSID5021205#exec_sum</a> | Cat 6 |
| DTXSID80 | Nitrous oxide               | 10024-97-2  | GQPLMR Y Oxo-1-lamb [O-][N-]    | InChI=1S/ N2O       | 44.013   | 44.00106 | 59  | 12804 | 50  | 51 | No AOPs available          | <a href="https://comptox.epa.gov/dashboard/dsstoxdb/results?search=DTXSID8021066#exec_sum">https://comptox.epa.gov/dashboard/dsstoxdb/results?search=DTXSID8021066#exec_sum</a> | Cat 6 |
| DTXSID70 | p-Cresol                    | 106-44-5    | IWDCLRJC. 4-Methylph. CC1=CC=   | InChI=1S/ C7H8O     | 108.14   | 108.0575 | 130 | 472   | 224 | 51 | AOP Links: 58              | <a href="https://comptox.epa.gov/dashboard/dsstoxdb/results?search=DTXSID7021869#exec_sum">https://comptox.epa.gov/dashboard/dsstoxdb/results?search=DTXSID7021869#exec_sum</a> | Cat 6 |
| DTXSID00 | 1,1,1-Trichloroethane       | 71-55-6     | UOCLXMC 1,1,1-Trich. CC(Cl)(Cl) | InChI=1S/ C2H3Cl3   | 133.4    | 131.93   | 139 | 385   | 86  | 50 | No AOPs available          | <a href="https://comptox.epa.gov/dashboard/dsstoxdb/results?search=DTXSID0021381#exec_sum">https://comptox.epa.gov/dashboard/dsstoxdb/results?search=DTXSID0021381#exec_sum</a> | Cat 7 |
| DTXSID80 | Methane                     | 74-82-8     | VNWKTOK Methane C               | InChI=1S/ CH4       | 16.043   | 16.0313  | 63  | 13041 | -   | 46 | No AOPs available          | <a href="https://comptox.epa.gov/dashboard/dsstoxdb/results?search=DTXSID8025545#exec_sum">https://comptox.epa.gov/dashboard/dsstoxdb/results?search=DTXSID8025545#exec_sum</a> | Cat 7 |
| DTXSID00 | Hydrobromic acid            | 10035-10-6  | CPELXLS/ Hydrogen lBr           | InChI=1S/ HBr       | 80.912   | 79.92616 | 48  | 105   | 98  | 46 | No AOPs available          | <a href="https://comptox.epa.gov/dashboard/dsstoxdb/results?search=DTXSID0029713#exec_sum">https://comptox.epa.gov/dashboard/dsstoxdb/results?search=DTXSID0029713#exec_sum</a> | Cat 7 |
| DTXSID70 | Helium                      | 7440-59-7   | SWQJXJO Helium [He]             | InChI=1S/ He        | 4.002602 | 4.002603 | 42  | 4694  | 33  | 46 | No AOPs available          | <a href="https://comptox.epa.gov/dashboard/dsstoxdb/results?search=DTXSID7036402#exec_sum">https://comptox.epa.gov/dashboard/dsstoxdb/results?search=DTXSID7036402#exec_sum</a> | Cat 7 |
| DTXSID30 | Bismuth                     | 7440-69-9   | BPBOBPIK Bismuth [Bi]           | InChI=1S/ Bi        | 208.9804 | 208.9804 | 48  | 5446  | -   | 46 | No AOPs available          | <a href="https://comptox.epa.gov/dashboard/dsstoxdb/results?search=DTXSID3052484#exec_sum">https://comptox.epa.gov/dashboard/dsstoxdb/results?search=DTXSID3052484#exec_sum</a> | Cat 7 |
| DTXSID50 | Carbon monoxide             | 630-08-0    | UGFAIRU Carbon mc C-[#](O+)     | InChI=1S/ CO        | 28.01    | 27.99491 | 69  | 18454 | 313 | 45 | No AOPs available          | <a href="https://comptox.epa.gov/dashboard/dsstoxdb/results?search=DTXSID5027273#exec_sum">https://comptox.epa.gov/dashboard/dsstoxdb/results?search=DTXSID5027273#exec_sum</a> | Cat 7 |
| DTXSID60 | Ammonium fluoride           | 121-05-01-8 | LDDQLRU Ammonium [NH4+].[F-]    | InChI=1S/ FH4N      | 37.037   | 37.03278 | 36  | 92    | 31  | 42 | No AOPs available          | <a href="https://comptox.epa.gov/dashboard/dsstoxdb/results?search=DTXSID6050463#exec_sum">https://comptox.epa.gov/dashboard/dsstoxdb/results?search=DTXSID6050463#exec_sum</a> | Cat 7 |
| DTXSID70 | Hydroxylamine               | 7803-49-8   | AVXURJP/ Hydroxylar NO          | InChI=1S/ H3NO      | 33.03    | 33.02146 | 46  | 1546  | 90  | 41 | No AOPs available          | <a href="https://comptox.epa.gov/dashboard/dsstoxdb/results?search=DTXSID7041043#exec_sum">https://comptox.epa.gov/dashboard/dsstoxdb/results?search=DTXSID7041043#exec_sum</a> | Cat 7 |
| DTXSID20 | Phosphine                   | 7803-51-2   | XYFCBTP/ Phosphane P            | InChI=1S/ H3P       | 33.998   | 33.99724 | 67  | 928   | -   | 37 | No AOPs available          | <a href="https://comptox.epa.gov/dashboard/dsstoxdb/results?search=DTXSID2021157#exec_sum">https://comptox.epa.gov/dashboard/dsstoxdb/results?search=DTXSID2021157#exec_sum</a> | Cat 7 |
| DTXSID60 | Cobalt(II) oxide            | 1307-96-6   | IVMYJDG\ (Oxido)cob O=[Co]      | InChI=1S/ CoO       | 74.932   | 74.92811 | 49  | 318   | 32  | 36 | No AOPs available          | <a href="https://comptox.epa.gov/dashboard/dsstoxdb/results?search=DTXSID6051649#exec_sum">https://comptox.epa.gov/dashboard/dsstoxdb/results?search=DTXSID6051649#exec_sum</a> | Cat 7 |
| DTXSID70 | Trimellitic anhydride       | 552-30-7    | SRPWOOK 1,3-Dioxo- OC(=O)C1     | InChI=1S/ C9H4O5    | 192.126  | 192.0059 | 87  | 211   | 100 | 35 | AOP Links: 200             | <a href="https://comptox.epa.gov/dashboard/dsstoxdb/results?search=DTXSID7026235#exec_sum">https://comptox.epa.gov/dashboard/dsstoxdb/results?search=DTXSID7026235#exec_sum</a> | Cat 7 |
| DTXSID50 | Phosphoric trichloride      | 10025-87-3  | XHXFXVLI Phosphoric ClP(Cl)(Cl) | InChI=1S/ Cl3OP     | 153.32   | 151.8752 | 66  | 62    | 57  | 35 | No AOPs available          | <a href="https://comptox.epa.gov/dashboard/dsstoxdb/results?search=DTXSID5029710#exec_sum">https://comptox.epa.gov/dashboard/dsstoxdb/results?search=DTXSID5029710#exec_sum</a> | Cat 7 |
| DTXSID80 | Cobalt oxide (Co3O4)        | 1308-06-1   | -                               | -                   | -        | -        | 22  | -     | -   | 35 | No AOPs available          | <a href="https://comptox.epa.gov/dashboard/dsstoxdb/results?search=DTXSID8092420#exec_sum">https://comptox.epa.gov/dashboard/dsstoxdb/results?search=DTXSID8092420#exec_sum</a> | Cat 7 |
| DTXSID80 | Tungsten                    | 7440-33-7   | WFKWXM Tungsten [W]             | InChI=1S/ W         | 183.84   | 183.9509 | 54  | 2379  | 188 | 34 | No AOPs available          | <a href="https://comptox.epa.gov/dashboard/dsstoxdb/results?search=DTXSID8052481#exec_sum">https://comptox.epa.gov/dashboard/dsstoxdb/results?search=DTXSID8052481#exec_sum</a> | Cat 7 |
| DTXSID20 | Pentaerythritol triacrylate | 3524-68-3   | HVVWZTV. 2-(Hydroxy OCC(COC     | InChI=1S/ C14H18O7  | 298.291  | 298.1053 | 58  | 39    | 61  | 32 | AOP Links: 36, 43, 58, 59  | <a href="https://comptox.epa.gov/dashboard/dsstoxdb/results?search=DTXSID2025842#exec_sum">https://comptox.epa.gov/dashboard/dsstoxdb/results?search=DTXSID2025842#exec_sum</a> | Cat 7 |
| DTXSID10 | 3,3',5,5'-Tetrabromobisph   | 79-94-7     | VEORPZC 4,4'-(Propa CC(C)(C)=   | InChI=1S/ C15H12Br4 | 543.875  | 539.7571 | 120 | 354   | 99  | 32 | AOP Links: 36, 58, 59, 60  | <a href="https://comptox.epa.gov/dashboard/dsstoxdb/results?search=DTXSID1026081#exec_sum">https://comptox.epa.gov/dashboard/dsstoxdb/results?search=DTXSID1026081#exec_sum</a> | Cat 7 |
| DTXSID00 | Cadmium oxide               | 1306-19-0   | CFAEAQF. Cadmium c[O-].[Cd+     | InChI=1S/ CdO       | 128.413  | 129.8983 | 55  | 122   | 39  | 31 | No AOPs available          | <a href="https://comptox.epa.gov/dashboard/dsstoxdb/results?search=DTXSID0024715#exec_sum">https://comptox.epa.gov/dashboard/dsstoxdb/results?search=DTXSID0024715#exec_sum</a> | Cat 7 |
| DTXSID30 | Tetramethylammonium h       | 75-59-2     | WGTYBPL N,N,N-Trimr [OH-].[C+   | InChI=1S/ C4H13NO   | 91.154   | 91.09971 | 48  | 499   | 87  | 29 | AOP Links: 200             | <a href="https://comptox.epa.gov/dashboard/dsstoxdb/results?search=DTXSID3029108#exec_sum">https://comptox.epa.gov/dashboard/dsstoxdb/results?search=DTXSID3029108#exec_sum</a> | Cat 7 |
| DTXSID90 | Platinum                    | 7440-06-4   | BASFQCYQ Platinum [Pt]          | InChI=1S/ Pt        | 195.084  | 194.9648 | 41  | 52621 | 398 | 29 | No AOPs available          | <a href="https://comptox.epa.gov/dashboard/dsstoxdb/results?search=DTXSID9064681#exec_sum">https://comptox.epa.gov/dashboard/dsstoxdb/results?search=DTXSID9064681#exec_sum</a> | Cat 7 |
| DTXSID30 | Catechol                    | 120-80-9    | YCIMLLN Benzene-1 OC1=C(O)      | InChI=1S/ C6H6O2    | 110.112  | 110.0368 | 114 | 1704  | 187 | 28 | AOP Links: 58, 61, 66, 107 | <a href="https://comptox.epa.gov/dashboard/dsstoxdb/results?search=DTXSID3020257#exec_sum">https://comptox.epa.gov/dashboard/dsstoxdb/results?search=DTXSID3020257#exec_sum</a> | Cat 7 |
| DTXSID30 | Nitrobenzene                | 98-95-3     | LQNUZAD Nitrobenze [O-][N+](=   | InChI=1S/ C6H5NO2   | 123.111  | 123.032  | 140 | 748   | 165 | 27 | AOP Links: 187, 200        | <a href="https://comptox.epa.gov/dashboard/dsstoxdb/results?search=DTXSID3020964#exec_sum">https://comptox.epa.gov/dashboard/dsstoxdb/results?search=DTXSID3020964#exec_sum</a> | Cat 7 |
| DTXSID20 | Diethyl oxalate             | 95-92-1     | WYACBZC Diethyl eth. COOC(=O)   | InChI=1S/ C6H10O4   | 146.142  | 146.0579 | 65  | -     | 94  | 27 | No AOPs available          | <a href="https://comptox.epa.gov/dashboard/dsstoxdb/results?search=DTXSID2044472#exec_sum">https://comptox.epa.gov/dashboard/dsstoxdb/results?search=DTXSID2044472#exec_sum</a> | Cat 7 |
| DTXSID30 | Argon                       | 7440-37-1   | XKRFYHL Argon [Ar]              | InChI=1S/ Ar        | 39.948   | 39.96238 | 38  | 3729  | 41  | 26 | No AOPs available          | <a href="https://comptox.epa.gov/dashboard/dsstoxdb/results?search=DTXSID3052482#exec_sum">https://comptox.epa.gov/dashboard/dsstoxdb/results?search=DTXSID3052482#exec_sum</a> | Cat 7 |
| DTXSID10 | Diethylene glycol dimethyl  | 111-96-6    | SBZXBUI. 1-Methoxy. COCCOCC     | InChI=1S/ C6H14O3   | 134.175  | 134.0943 | 92  | 38    | 156 | 25 | No AOPs available          | <a href="https://comptox.epa.gov/dashboard/dsstoxdb/results?search=DTXSID1024621#exec_sum">https://comptox.epa.gov/dashboard/dsstoxdb/results?search=DTXSID1024621#exec_sum</a> | Cat 7 |
| DTXSID10 | Nitric oxide                | 10102-43-9  | MWUXSHI Oxamino [N]=O           | InChI=1S/ N O       | 30.006   | 29.99799 | 55  | 79178 | 162 | 24 | No AOPs available          | <a href="https://comptox.epa.gov/dashboard/dsstoxdb/results?search=DTXSID1020938#exec_sum">https://comptox.epa.gov/dashboard/dsstoxdb/results?search=DTXSID1020938#exec_sum</a> | Cat 7 |
| DTXSID10 | 1-Nitropropane              | 108-03-2    | JSZOAYX. 1-Nitropropr. CCC(N+)  | InChI=1S/ C3H7NO2   | 89.094   | 89.04768 | 85  | 17    | 92  | 23 | AOP Links: 150, 177        | <a href="https://comptox.epa.gov/dashboard/dsstoxdb/results?search=DTXSID1020980#exec_sum">https://comptox.epa.gov/dashboard/dsstoxdb/results?search=DTXSID1020980#exec_sum</a> | Cat 7 |
| DTXSID00 | Ozone                       | 10028-15-6  | CBFNFWS Trioxid-2-e [O-][O+]=   | InChI=1S/ O3        | 47.997   | 47.98474 | 86  | 12121 | 33  | 23 | No AOPs available          | <a href="https://comptox.epa.gov/dashboard/dsstoxdb/results?search=DTXSID0021098#exec_sum">https://comptox.epa.gov/dashboard/dsstoxdb/results?search=DTXSID0021098#exec_sum</a> | Cat 7 |
| DTXSID40 | 2-Methylimidazole           | 693-98-1    | LXBGSDV. 2-Methyl-1 CC1=NC=C    | InChI=1S/ C4H6N2    | 82.106   | 82.0531  | 61  | 44    | 130 | 23 | No AOPs available          | <a href="https://comptox.epa.gov/dashboard/dsstoxdb/results?search=DTXSID4022107#exec_sum">https://comptox.epa.gov/dashboard/dsstoxdb/results?search=DTXSID4022107#exec_sum</a> | Cat 7 |
| DTXSID00 | Trifluoromethane            | 75-46-7     | XPDWGB( Trifluorom F(C)(F)      | InChI=1S/ CHF3      | 70.014   | 70.00303 | 55  | 101   | 51  | 23 | No AOPs available          | <a href="https://comptox.epa.gov/dashboard/dsstoxdb/results?search=DTXSID0026410#exec_sum">https://comptox.epa.gov/dashboard/dsstoxdb/results?search=DTXSID0026410#exec_sum</a> | Cat 7 |
| DTXSID00 | Trimethyl borate            | 121-43-7    | WRECI MR Trimethyl b. COB(O)C   | InChI=1S/ C3H9BO3   | 103.91   | 104.0645 | 53  | 9     | 105 | 23 | No AOPs available          | <a href="https://comptox.epa.gov/dashboard/dsstoxdb/results?search=DTXSID0037738#exec_sum">https://comptox.epa.gov/dashboard/dsstoxdb/results?search=DTXSID0037738#exec_sum</a> | Cat 7 |
| DTXSID20 | Hexamethyldisilazane        | 999-97-3    | FUAGWL. 1,1,1-Trimr C[Si](C)(C) | InChI=1S/ C6H19NSi3 | 161.395  | 161.1056 | 76  | 73    | 86  | 22 | AOP Links: 66, 187, 200    | <a href="https://comptox.epa.gov/dashboard/dsstoxdb/results?search=999-97-3#exec_sum">https://comptox.epa.gov/dashboard/dsstoxdb/results?search=999-97-3#exec_sum</a>           | Cat 7 |
| DTXSID60 | Methane, difluoro-          | 75-10-5     | RWRIWBA Difluorome FCF          | InChI=1S/ CH2F2     | 52.024   | 52.01246 | 52  | 21    | 54  | 22 | No AOPs available          | <a href="https://comptox.epa.gov/dashboard/dsstoxdb/results?search=DTXSID6029597#exec_sum">https://comptox.epa.gov/dashboard/dsstoxdb/results?search=DTXSID6029597#exec_sum</a> | Cat 7 |
| DTXSID30 | Cadmium sulfide             | 1306-23-6   | CJOBVZJ( Sulfido)ca S=[Cd]      | InChI=1S/ CdS       | 144.47   | 145.8754 | 22  | -     | -   | 22 | No AOPs available          | <a href="https://comptox.epa.gov/dashboard/dsstoxdb/results?search=DTXSID3089320#exec_sum">https://comptox.epa.gov/dashboard/dsstoxdb/results?search=DTXSID3089320#exec_sum</a> | Cat 7 |
| DTXSID50 | Methyl formate              | 107-31-3    | ZIHFWKZ Methyl form COC=O       | InChI=1S/ C2H4O2    | 60.052   | 60.02113 | 87  | 39    | 89  | 21 | No AOPs available          | <a href="https://comptox.epa.gov/dashboard/dsstoxdb/results?search=DTXSID5025609#exec_sum">https://comptox.epa.gov/dashboard/dsstoxdb/results?search=DTXSID5025609#exec_sum</a> | Cat 7 |
| DTXSID60 | Sulfur fluoride (SF6)       | 2551-62-4   | SFZCNBIF Hexafluoro FS(F)(F)    | InChI=1S/ F6S       | 146.05   | 145.9625 | 45  | 3335  | 43  | 21 | No AOPs available          | <a href="https://comptox.epa.gov/dashboard/dsstoxdb/results?search=DTXSID6029656#exec_sum">https://comptox.epa.gov/dashboard/dsstoxdb/results?search=DTXSID6029656#exec_sum</a> | Cat 7 |
| DTXSID70 | Cyclohexyl methacrylate     | 101-43-9    | OIWOHNB Cyclohexyl CC(=C)C(=    | InChI=1S/ C10H16O2  | 168.236  | 168.115  | 45  | -     | 61  | 20 | No AOPs available          |                                                                                                                                                                                 |       |

|          |                                        |            |                                                            |          |          |     |      |     |    |                           |                                                                                                                                                                                     |        |
|----------|----------------------------------------|------------|------------------------------------------------------------|----------|----------|-----|------|-----|----|---------------------------|-------------------------------------------------------------------------------------------------------------------------------------------------------------------------------------|--------|
| DTXSID30 | Sulfolane                              | 126-33-0   | HXJUTPC; 1lambda--epsilon-O=S(=O) InChI=1S/C4H8O2S         | 120.17   | 120.0245 | 81  | 54   | 141 | 17 | No AOPs available         | <a href="https://comptox.epa.gov/dashboard/dsstoxdb/results?search=DTXSID3027037#exec_sum">https://comptox.epa.gov/dashboard/dsstoxdb/results?search=DTXSID3027037#exec_sum</a>     | Cat. 7 |
| DTXSID50 | Phosphorous trichloride                | 7719-12-2  | FAIAAWC\Phosphoro ClP(Cl)Cl InChI=1S/C13P                  | 137.32   | 135.8803 | 48  | 20   | 46  | 17 | No AOPs available         | <a href="https://comptox.epa.gov/dashboard/dsstoxdb/results?search=DTXSID5029687#exec_sum">https://comptox.epa.gov/dashboard/dsstoxdb/results?search=DTXSID5029687#exec_sum</a>     | Cat. 7 |
| DTXSID80 | Titanium tetrachloride                 | 7550-45-0  | XJDNKRIX Titanium(4 Cl[Ti])(Cl)C InChI=1S/C4Ti             | 189.67   | 187.8234 | 44  | 106  | 42  | 16 | No AOPs available         | <a href="https://comptox.epa.gov/dashboard/dsstoxdb/results?search=DTXSID8042476#exec_sum">https://comptox.epa.gov/dashboard/dsstoxdb/results?search=DTXSID8042476#exec_sum</a>     | Cat. 7 |
| DTXSID60 | Silane                                 | 7783-62-5  | BLRPTPM.Silane [SiH4] InChI=1S/H4Si                        | 32.117   | 32.00823 | 38  | 83   | -   | 16 | No AOPs available         | <a href="https://comptox.epa.gov/dashboard/dsstoxdb/results?search=DTXSID6052634#exec_sum">https://comptox.epa.gov/dashboard/dsstoxdb/results?search=DTXSID6052634#exec_sum</a>     | Cat. 7 |
| DTXSID30 | Fluorine                               | 7802-41-4  | PXGOKW\Fluorine FF InChI=1S/F2                             | 37.99681 | 37.99681 | 54  | 7727 | 28  | 14 | No AOPs available         | <a href="https://comptox.epa.gov/dashboard/dsstoxdb/results?search=DTXSID3024106#exec_sum">https://comptox.epa.gov/dashboard/dsstoxdb/results?search=DTXSID3024106#exec_sum</a>     | Cat. 7 |
| DTXSID00 | Nickel carbonyl                        | 13463-39-3 | AWDHUGI Carbon mc[Ni].[C-]#C InChI=1S/4 C4NiO4             | 170.733  | 169.915  | 45  | 65   | 19  | 13 | No AOPs available         | <a href="https://comptox.epa.gov/dashboard/dsstoxdb/results?search=DTXSID0024212#exec_sum">https://comptox.epa.gov/dashboard/dsstoxdb/results?search=DTXSID0024212#exec_sum</a>     | Cat. 7 |
| DTXSID70 | Boron trifluoride                      | 7673-07-2  | WTEOIRV\Trifluoroborane(F)F InChI=1S/BF3                   | 67.81    | 68.00451 | 48  | 111  | 67  | 12 | No AOPs available         | <a href="https://comptox.epa.gov/dashboard/dsstoxdb/results?search=DTXSID7041677#exec_sum">https://comptox.epa.gov/dashboard/dsstoxdb/results?search=DTXSID7041677#exec_sum</a>     | Cat. 7 |
| DTXSID50 | Arsenic(III) sulfide                   | 1303-33-9  | UKUVVAM\Bicyclo[1.1.1]S[As]2S InChI=1S/As2S3               | 246.02   | 245.7594 | 25  | 76   | 4   | 12 | No AOPs available         | <a href="https://comptox.epa.gov/dashboard/dsstoxdb/results?search=DTXSID50274153#exec_sum">https://comptox.epa.gov/dashboard/dsstoxdb/results?search=DTXSID50274153#exec_sum</a>   | Cat. 7 |
| DTXSID50 | Bisphenol F diglycidyl ether           | 39817-09-9 |                                                            |          |          | 12  | -    | -   | 12 | No AOPs available         | <a href="https://comptox.epa.gov/dashboard/dsstoxdb/results?search=DTXSID50883204#exec_sum">https://comptox.epa.gov/dashboard/dsstoxdb/results?search=DTXSID50883204#exec_sum</a>   | Cat. 7 |
| DTXSID70 | (E)-1,2-Dichloroethylene               | 156-60-5   | KFUSEUY (E)-1,2-Dic ClC=C(Cl) InChI=1S/C2H2Cl2             | 96.94    | 95.95336 | 104 | 120  | 82  | 11 | AOP Links: 187            | <a href="https://comptox.epa.gov/dashboard/dsstoxdb/results?search=DTXSID7024031#exec_sum">https://comptox.epa.gov/dashboard/dsstoxdb/results?search=DTXSID7024031#exec_sum</a>     | Cat. 7 |
| DTXSID20 | Carbon tetrafluoride                   | 75-73-0    | TXEYQDL\Tetrafluoro C(F)(F)F InChI=1S/CF4                  | 88.005   | 87.99361 | 46  | 42   | 46  | 11 | No AOPs available         | <a href="https://comptox.epa.gov/dashboard/dsstoxdb/results?search=DTXSID2041757#exec_sum">https://comptox.epa.gov/dashboard/dsstoxdb/results?search=DTXSID2041757#exec_sum</a>     | Cat. 7 |
| DTXSID90 | Perflutren                             | 76-19-7    | QYSGYZV\Octafluoro C(F)(F)(F)C InChI=1S/C3F8               | 188.02   | 187.9872 | 47  | 1122 | 53  | 11 | No AOPs available         | <a href="https://comptox.epa.gov/dashboard/dsstoxdb/results?search=DTXSID9052603#exec_sum">https://comptox.epa.gov/dashboard/dsstoxdb/results?search=DTXSID9052603#exec_sum</a>     | Cat. 7 |
| DTXSID10 | Methanesulfonic acid, tin              | 53408-94-9 | JALQBGJ - [Sn++] .CS InChI=1S/2 C2H6O6S2                   | 308.89   | 309.8628 | 17  | -    | 33  | 11 | No AOPs available         | <a href="https://comptox.epa.gov/dashboard/dsstoxdb/results?search=DTXSID1068851#exec_sum">https://comptox.epa.gov/dashboard/dsstoxdb/results?search=DTXSID1068851#exec_sum</a>     | Cat. 7 |
| DTXSID30 | Arsine                                 | 7784-42-1  | RBFQJDQ\Arsine [AsH3] InChI=1S/AsH3                        | 77.946   | 77.94507 | 57  | 155  | 117 | 10 | No AOPs available         | <a href="https://comptox.epa.gov/dashboard/dsstoxdb/results?search=DTXSID3023760#exec_sum">https://comptox.epa.gov/dashboard/dsstoxdb/results?search=DTXSID3023760#exec_sum</a>     | Cat. 7 |
| DTXSID20 | 2-Methoxyethyl acetate                 | 110-49-6   | XLLIQLLC\2-Methoxy COCCOC InChI=1S/C5H10O3                 | 118.132  | 118.063  | 68  | 16   | 83  | 10 | No AOPs available         | <a href="https://comptox.epa.gov/dashboard/dsstoxdb/results?search=DTXSID2025553#exec_sum">https://comptox.epa.gov/dashboard/dsstoxdb/results?search=DTXSID2025553#exec_sum</a>     | Cat. 7 |
| DTXSID30 | Perfluorooctanesulfonic acid           | 1763-23-1  | YFSUTJL\Heptadeca OS(O)=O InChI=1S/C8HF17O2                | 500.13   | 499.9375 | 110 | 1124 | 68  | 10 | AOP Links: 43, 58, 60, 66 | <a href="https://comptox.epa.gov/dashboard/dsstoxdb/results?search=DTXSID3031864#exec_sum">https://comptox.epa.gov/dashboard/dsstoxdb/results?search=DTXSID3031864#exec_sum</a>     | Cat. 7 |
| DTXSID40 | Trichlorosilane                        | 10025-78-2 | ZDHXKXA\Trichlorosil C[SiH](Cl) InChI=1S/C13HSi            | 135.44   | 133.8913 | 47  | 46   | 40  | 9  | No AOPs available         | <a href="https://comptox.epa.gov/dashboard/dsstoxdb/results?search=DTXSID4029301#exec_sum">https://comptox.epa.gov/dashboard/dsstoxdb/results?search=DTXSID4029301#exec_sum</a>     | Cat. 8 |
| DTXSID00 | Silane, tetrachloro-                   | 10026-04-7 | FDNAPBU\Tetrachlor C[Si](Cl)C InChI=1S/C4HSi               | 169.89   | 167.8523 | 43  | 25   | 55  | 8  | No AOPs available         | <a href="https://comptox.epa.gov/dashboard/dsstoxdb/results?search=DTXSID0029711#exec_sum">https://comptox.epa.gov/dashboard/dsstoxdb/results?search=DTXSID0029711#exec_sum</a>     | Cat. 8 |
| DTXSID90 | Octafluorocyclobutane                  | 115-25-3   | BCCOBQ\Octafluoro C(F)(F)C InChI=1S/C4F8                   | 200.031  | 199.9872 | 51  | 8    | 52  | 8  | No AOPs available         | <a href="https://comptox.epa.gov/dashboard/dsstoxdb/results?search=DTXSID9041811#exec_sum">https://comptox.epa.gov/dashboard/dsstoxdb/results?search=DTXSID9041811#exec_sum</a>     | Cat. 8 |
| DTXSID20 | Hydrogen selenide                      | 7783-07-5  | SPVXKVO - [SeH2] InChI=1S/H2Se                             | 80.987   | 81.93217 | 40  | 27   | 93  | 8  | No AOPs available         | <a href="https://comptox.epa.gov/dashboard/dsstoxdb/results?search=DTXSID2087282#exec_sum">https://comptox.epa.gov/dashboard/dsstoxdb/results?search=DTXSID2087282#exec_sum</a>     | Cat. 8 |
| DTXSID10 | Trimethyl phosphate                    | 512-56-1   | WVLBCYC\Trimethyl P COP(=O) InChI=1S/C3H9O4P               | 140.075  | 140.0238 | 98  | 677  | 86  | 7  | AOP Links: 60             | <a href="https://comptox.epa.gov/dashboard/dsstoxdb/results?search=DTXSID1021403#exec_sum">https://comptox.epa.gov/dashboard/dsstoxdb/results?search=DTXSID1021403#exec_sum</a>     | Cat. 8 |
| DTXSID90 | Tetramethylsilane                      | 75-76-3    | CZDYPVP\Tetramethyl C[Si](C)C InChI=1S/C4H12Si             | 88.225   | 88.07083 | 63  | 31   | 120 | 7  | No AOPs available         | <a href="https://comptox.epa.gov/dashboard/dsstoxdb/results?search=DTXSID9052603#exec_sum">https://comptox.epa.gov/dashboard/dsstoxdb/results?search=DTXSID9052603#exec_sum</a>     | Cat. 8 |
| DTXSID90 | Tellurium                              | 13494-80-9 | PORWMMNI\Tellurium [Te] InChI=1S/Te                        | 127.6    | 129.9062 | 58  | 2502 | -   | 7  | No AOPs available         | <a href="https://comptox.epa.gov/dashboard/dsstoxdb/results?search=DTXSID9032119#exec_sum">https://comptox.epa.gov/dashboard/dsstoxdb/results?search=DTXSID9032119#exec_sum</a>     | Cat. 8 |
| DTXSID20 | Boron trichloride                      | 10294-34-5 | FAQYAMR\Trichloroborane C(B)(Cl)C InChI=1S/BCl3            | 117.16   | 115.9159 | 43  | 21   | 67  | 7  | No AOPs available         | <a href="https://comptox.epa.gov/dashboard/dsstoxdb/results?search=DTXSID2041676#exec_sum">https://comptox.epa.gov/dashboard/dsstoxdb/results?search=DTXSID2041676#exec_sum</a>     | Cat. 8 |
| DTXSID80 | Indium                                 | 7440-74-6  | APFVFJF\Indium [In] InChI=1S/In                            | 114.818  | 114.9039 | 44  | 4284 | 172 | 7  | No AOPs available         | <a href="https://comptox.epa.gov/dashboard/dsstoxdb/results?search=DTXSID8052485#exec_sum">https://comptox.epa.gov/dashboard/dsstoxdb/results?search=DTXSID8052485#exec_sum</a>     | Cat. 8 |
| DTXSID70 | Dimethylamine-borane                   | 174-94-2   | FTDUHBO\N-Methyl B.CNC InChI=1S/C2H10BN                    | 58.92    | 59.09063 | 22  | -    | 29  | 7  | No AOPs available         | <a href="https://comptox.epa.gov/dashboard/dsstoxdb/results?search=DTXSID7052494#exec_sum">https://comptox.epa.gov/dashboard/dsstoxdb/results?search=DTXSID7052494#exec_sum</a>     | Cat. 8 |
| DTXSID80 | 1,2-Dichloroethylene                   | 540-59-0   | KFUSEUY 1,2-Diclor C=C(Cl) InChI=1S/C2H2Cl2                | 96.94    | 95.95336 | 79  | 120  | 40  | 6  | No AOPs available         | <a href="https://comptox.epa.gov/dashboard/dsstoxdb/results?search=DTXSID8024991#exec_sum">https://comptox.epa.gov/dashboard/dsstoxdb/results?search=DTXSID8024991#exec_sum</a>     | Cat. 8 |
| DTXSID00 | Lead(II) sulfide                       | 1314-87-0  | XCAUINMI\lambda-2-S=[Pb] InChI=1S/PbS                      | 239.3    | 239.9487 | 34  | 226  | 45  | 6  | No AOPs available         | <a href="https://comptox.epa.gov/dashboard/dsstoxdb/results?search=DTXSID0025498#exec_sum">https://comptox.epa.gov/dashboard/dsstoxdb/results?search=DTXSID0025498#exec_sum</a>     | Cat. 8 |
| DTXSID80 | Gallium trichloride                    | 13450-90-3 | UPWPDUF\Gallium tric C[Ga](Cl)C InChI=1S/Cl3Ga             | 176.07   | 173.8321 | 32  | 47   | 33  | 6  | No AOPs available         | <a href="https://comptox.epa.gov/dashboard/dsstoxdb/results?search=DTXSID8031360#exec_sum">https://comptox.epa.gov/dashboard/dsstoxdb/results?search=DTXSID8031360#exec_sum</a>     | Cat. 8 |
| DTXSID40 | Antimony trichloride                   | 10025-91-9 | FAPDDOB\Trichlorost C[Sb](Cl)C InChI=1S/Cl3Sb              | 228.11   | 225.8104 | 62  | 27   | 52  | 6  | AOP Links: 36, 58, 61, 66 | <a href="https://comptox.epa.gov/dashboard/dsstoxdb/results?search=DTXSID4044161#exec_sum">https://comptox.epa.gov/dashboard/dsstoxdb/results?search=DTXSID4044161#exec_sum</a>     | Cat. 8 |
| DTXSID10 | Dichlorosilane                         | 4109-96-0  | MROCM\ Dichlorosil C[SiH2]Cl InChI=1S/Cl2H2Si              | 101      | 99.93028 | 29  | 5    | 34  | 6  | No AOPs available         | <a href="https://comptox.epa.gov/dashboard/dsstoxdb/results?search=DTXSID1052082#exec_sum">https://comptox.epa.gov/dashboard/dsstoxdb/results?search=DTXSID1052082#exec_sum</a>     | Cat. 8 |
| DTXSID90 | Diborane                               | 19287-45-7 | KLDBIFITL - [BH2]1[H] InChI=1S/B2H6                        | 27.67    | 28.06556 | 39  | 31   | -   | 5  | No AOPs available         | <a href="https://comptox.epa.gov/dashboard/dsstoxdb/results?search=DTXSID9024938#exec_sum">https://comptox.epa.gov/dashboard/dsstoxdb/results?search=DTXSID9024938#exec_sum</a>     | Cat. 8 |
| DTXSID40 | Nitrogen trifluoride                   | 7783-54-2  | GVGCUCJ\N-Trifluor FNF InChI=1S/F3N                        | 71.002   | 70.99828 | 34  | 10   | 33  | 5  | No AOPs available         | <a href="https://comptox.epa.gov/dashboard/dsstoxdb/results?search=DTXSID4040181#exec_sum">https://comptox.epa.gov/dashboard/dsstoxdb/results?search=DTXSID4040181#exec_sum</a>     | Cat. 8 |
| DTXSID10 | Lead titanium oxide (PbTi)             | 12060-00-3 | NKZSPGS - [Pb++] .[O-] InChI=1S/O3PbTi                     | 303.1    | 303.9093 | 21  | -    | -   | 5  | No AOPs available         | <a href="https://comptox.epa.gov/dashboard/dsstoxdb/results?search=DTXSID1093963#exec_sum">https://comptox.epa.gov/dashboard/dsstoxdb/results?search=DTXSID1093963#exec_sum</a>     | Cat. 8 |
| DTXSID00 | Hexafluoro-lambda-6-silane             | 7783-79-1  | LMDVZDM - F[Se](F)(F) InChI=1S/F6Se                        | 192.961  | 193.9069 | 8   | -    | -   | 5  | No AOPs available         | <a href="https://comptox.epa.gov/dashboard/dsstoxdb/results?search=DTXSID00999041#exec_sum">https://comptox.epa.gov/dashboard/dsstoxdb/results?search=DTXSID00999041#exec_sum</a>   | Cat. 8 |
| DTXSID20 | Perfluoroethane                        | 76-16-4    | WMIYKQL\Hexafluoro C(F)(F)C InChI=1S/C2F6                  | 138.012  | 137.9904 | 49  | 55   | 49  | 4  | No AOPs available         | <a href="https://comptox.epa.gov/dashboard/dsstoxdb/results?search=DTXSID2041915#exec_sum">https://comptox.epa.gov/dashboard/dsstoxdb/results?search=DTXSID2041915#exec_sum</a>     | Cat. 8 |
| DTXSID40 | Perfluoroisobutene                     | 382-21-8   | DAFIBNSJ 1,1,3,3-PFC(F)C InChI=1S/C4F8                     | 200.031  | 199.9872 | 23  | 20   | 28  | 4  | No AOPs available         | <a href="https://comptox.epa.gov/dashboard/dsstoxdb/results?search=DTXSID4073176#exec_sum">https://comptox.epa.gov/dashboard/dsstoxdb/results?search=DTXSID4073176#exec_sum</a>     | Cat. 8 |
| DTXSID70 | Germanium tetrahydride                 | 7782-65-2  | QUZPNFF\Germane [GeH4] InChI=1S/GeH4                       | 76.662   | 77.95248 | 26  | -    | -   | 3  | No AOPs available         | <a href="https://comptox.epa.gov/dashboard/dsstoxdb/results?search=DTXSID7052521#exec_sum">https://comptox.epa.gov/dashboard/dsstoxdb/results?search=DTXSID7052521#exec_sum</a>     | Cat. 8 |
| DTXSID40 | Boron tribromide                       | 10294-33-4 | ILAHWRK\Tribromoborane C(Br)(Br)Br InChI=1S/Br3            | 250.52   | 247.7643 | 26  | -    | 59  | 3  | No AOPs available         | <a href="https://comptox.epa.gov/dashboard/dsstoxdb/results?search=DTXSID4065028#exec_sum">https://comptox.epa.gov/dashboard/dsstoxdb/results?search=DTXSID4065028#exec_sum</a>     | Cat. 8 |
| DTXSID70 | 2,3-Dibromopropanol                    | 96-13-9    | QWVCIOR\2,3-Dibrom OCC(Br)C InChI=1S/C3H6Br2O              | 217.888  | 215.8785 | 59  | 10   | 73  | 2  | No AOPs available         | <a href="https://comptox.epa.gov/dashboard/dsstoxdb/results?search=DTXSID7021817#exec_sum">https://comptox.epa.gov/dashboard/dsstoxdb/results?search=DTXSID7021817#exec_sum</a>     | Cat. 8 |
| DTXSID60 | Carbonyl sulfide                       | 463-58-1   | JJWKPUR\ Sulfanylide O=C=S InChI=1S/COS                    | 60.07    | 59.96699 | 52  | 108  | 43  | 2  | No AOPs available         | <a href="https://comptox.epa.gov/dashboard/dsstoxdb/results?search=DTXSID6023949#exec_sum">https://comptox.epa.gov/dashboard/dsstoxdb/results?search=DTXSID6023949#exec_sum</a>     | Cat. 8 |
| DTXSID60 | Oxirane, 2-(tetradecyloxy)             | 38954-75-5 | NVKSMMKF 2-[(Tetradecyl)C] InChI=1S/C17H34O2               | 270.457  | 270.2559 | 9   | -    | -   | 2  | No AOPs available         | <a href="https://comptox.epa.gov/dashboard/dsstoxdb/results?search=DTXSID608865935#exec_sum">https://comptox.epa.gov/dashboard/dsstoxdb/results?search=DTXSID608865935#exec_sum</a> | Cat. 8 |
| DTXSID60 | Oxirane, 2,2'-(3,3',5,5'-tetrahydroxy) | 85954-11-6 | HRSLYNJ 2,2'-(3,3',5,5'-tetrahydroxy)C=C InChI=1S/C22H26O4 | 354.446  | 354.1831 | 14  | -    | -   | 2  | No AOPs available         | <a href="https://comptox.epa.gov/dashboard/dsstoxdb/results?search=DTXSID60888669#exec_sum">https://comptox.epa.gov/dashboard/dsstoxdb/results?search=DTXSID60888669#exec_sum</a>   | Cat. 8 |
| DTXSID80 | Tungsten hexafluoride                  | 7783-82-6  | NXHILPIE\ Tungsten (F)W(F)(F) InChI=1S/F6W                 | 297.83   | 297.9414 | 15  | -    | -   | 2  | No AOPs available         | <a href="https://comptox.epa.gov/dashboard/dsstoxdb/results?search=DTXSID8089377#exec_sum">https://comptox.epa.gov/dashboard/dsstoxdb/results?search=DTXSID8089377#exec_sum</a>     | Cat. 8 |
| DTXSID20 | (Z)-1,2-Dichloroethylene               | 156-59-2   | KFUSEUY (Z)-1,2-Dic ClC=C(Cl) InChI=1S/C2H2Cl2             | 96.94    | 95.95336 | 77  | 120  | 50  | 1  | No AOPs available         | <a href="https://comptox.epa.gov/dashboard/dsstoxdb/results?search=DTXSID2024030#exec_sum">https://comptox.epa.gov/dashboard/dsstoxdb/results?search=DTXSID2024030#exec_sum</a>     | Cat. 8 |
| DTXSID10 | Dodecyl glycidyl ether                 | 2461-18-9  | VMSIYTPV 2-[(Dodecyl)C] InChI=1S/C15H30O2                  | 242.403  | 242.2246 | 44  | 2    | 38  | 1  | No AOPs available         | <a href="https://comptox.epa.gov/dashboard/dsstoxdb/results?search=DTXSID0025494#exec_sum">https://comptox.epa.gov/dashboard/dsstoxdb/results?search=DTXSID0025494#exec_sum</a>     | Cat. 8 |
| DTXSID20 | Triethyl borate                        | 150-46-9   | AJSTXXY\Triethyl borate COC(B)OC InChI=1S/C6H15BO3         | 145.99   | 146.1114 | 45  | -    | 67  | 1  | No AOPs available         | <a href="https://comptox.epa.gov/dashboard/dsstoxdb/results?search=DTXSID2041674#exec_sum">https://comptox.epa.gov/dashboard/dsstoxdb/results?search=DTXSID2041674#exec_sum</a>     | Cat. 8 |
| DTXSID10 | Germanium tetrachloride                | 10038-98-9 | IEXRMSF\Tetrachlor C[Ge](Cl)C InChI=1S/Cl4Ge               | 214.43   | 213.7966 | 43  | 3    | 37  | 1  | No AOPs available         | <a href="https://comptox.epa.gov/dashboard/dsstoxdb/results?search=DTXSID1044360#exec_sum">https://comptox.epa.gov/dashboard/dsstoxdb/results?search=DTXSID1044360#exec_sum</a>     | Cat. 8 |
| DTXSID80 | Hafnium                                | 7440-58-6  | VBZVLUI\Hafnium [Hf] InChI=1S/Hf                           | 178.49   | 179.9466 | 39  | 209  | 69  | 1  | No AOPs available         | <a href="https://comptox.epa.gov/dashboard/dsstoxdb/results?search=DTXSID8064698#exec_sum">https://comptox.epa.gov/dashboard/dsstoxdb/results?search=DTXSID8064698#exec_sum</a>     | Cat. 8 |

| DTXSID        | PREFERRED_NAME        | CASRN      | Hazard Classification                                                                                                                                                                                                                                                                                                 | Cat. By Toxicity | In AOPWiki                                            | EPA Comptox                                                                                                                                                                     |
|---------------|-----------------------|------------|-----------------------------------------------------------------------------------------------------------------------------------------------------------------------------------------------------------------------------------------------------------------------------------------------------------------------|------------------|-------------------------------------------------------|---------------------------------------------------------------------------------------------------------------------------------------------------------------------------------|
|               |                       |            | GHS08: Serious Health Hazard GHS07: Health hazard                                                                                                                                                                                                                                                                     |                  |                                                       |                                                                                                                                                                                 |
| DTXSID7021817 | 2,3-Dibromopropanol   | 96-13-9    | Danger! According to the harmonised classification and labelling (CLP00) approved by the European Union, this substance is toxic in contact with skin, may cause cancer, is harmful if swallowed, is harmful if inhaled, is suspected of damaging fertility and is harmful to aquatic life with long lasting effects. | Cat. I           | No AOPs available                                     | <a href="https://comptox.epa.gov/dashboard/dsstoxdb/results?search=DTXSID7021817#exec_sum">https://comptox.epa.gov/dashboard/dsstoxdb/results?search=DTXSID7021817#exec_sum</a> |
| DTXSID1024097 | 2-Butoxyethanol       | 111-76-2   | Acute toxic(Oral) : Cat. 4                                                                                                                                                                                                                                                                                            | Cat. I           | <b>AOP Links: 58, 200</b>                             | <a href="https://comptox.epa.gov/dashboard/dsstoxdb/results?search=DTXSID1024097#exec_sum">https://comptox.epa.gov/dashboard/dsstoxdb/results?search=DTXSID1024097#exec_sum</a> |
| DTXSID4022107 | 2-Methylimidazole     | 693-98-1   | Acute toxic(Inhalation: Vapor) : Cat. 3<br>Skin corrosion/irritation : Cat. 1<br>Flammable liquid : Cat. 2                                                                                                                                                                                                            | Cat. I           | No AOPs available                                     | <a href="https://comptox.epa.gov/dashboard/dsstoxdb/results?search=DTXSID4022107#exec_sum">https://comptox.epa.gov/dashboard/dsstoxdb/results?search=DTXSID4022107#exec_sum</a> |
| DTXSID5021889 | 4-Methyl-2-pentanone  | 108-10-1   | Acute toxic(Inhalation: Vapor) : Cat. 3<br>Carcinogenic : Cat. 2<br>Specific target organ toxic(Single exposure) : Cat. 3(Anesthesia)<br>Specific target organ toxic(Single exposure) : Cat. 1<br>Flammable liquid : Cat. 1<br>Acute toxic(Oral) : Cat. 4                                                             | Cat. I           | <b>AOP Links: 60</b>                                  | <a href="https://comptox.epa.gov/dashboard/dsstoxdb/results?search=DTXSID5021889#exec_sum">https://comptox.epa.gov/dashboard/dsstoxdb/results?search=DTXSID5021889#exec_sum</a> |
| DTXSID5039224 | Acetaldehyde          | 75-07-0    | Serious eye damage/eye irritation : Cat. 2<br>Carcinogenic : Cat. 1B<br>Specific target organ toxic(Single exposure) : Cat. 3(Respiratory system irritation)                                                                                                                                                          | Cat. I           | <b>AOP Links: 36, 61, 66, 107, 153, 163, 187, 200</b> | <a href="https://comptox.epa.gov/dashboard/dsstoxdb/results?search=DTXSID5039224#exec_sum">https://comptox.epa.gov/dashboard/dsstoxdb/results?search=DTXSID5039224#exec_sum</a> |
|               | Anatase               | 1317-70-0  | Carcinogenic : Cat. 2                                                                                                                                                                                                                                                                                                 | Cat. I           | No AOPs available                                     | <a href="https://comptox.epa.gov/dashboard/dsstoxdb/results?search=DTXSID9050432#exec_sum">https://comptox.epa.gov/dashboard/dsstoxdb/results?search=DTXSID9050432#exec_sum</a> |
| DTXSID4044161 | Antimony trichloride  | 10025-91-9 | Metal corrosive : Cat. 1<br>Acute toxic(Oral) : Cat. 4<br>Skin corrosion/irritation : Cat. 2<br>Serious eye damage/eye irritation : Cat. 2<br>Carcinogenic : Cat. 2                                                                                                                                                   | Cat. I           | <b>AOP Links: 36, 58, 61, 66, 187, 200</b>            | <a href="https://comptox.epa.gov/dashboard/dsstoxdb/results?search=DTXSID4044161#exec_sum">https://comptox.epa.gov/dashboard/dsstoxdb/results?search=DTXSID4044161#exec_sum</a> |
| DTXSID4023880 | Antimony trioxide     | 1309-64-4  | Carcinogenic : Cat. 1B                                                                                                                                                                                                                                                                                                | Cat. I           | No AOPs available                                     | <a href="https://comptox.epa.gov/dashboard/dsstoxdb/results?search=DTXSID4023880#exec_sum">https://comptox.epa.gov/dashboard/dsstoxdb/results?search=DTXSID4023880#exec_sum</a> |
| DTXSID4023886 | Arsenic               | 7440-38-2  | Acute toxic(Oral) : Cat. 4<br>Skin corrosion/irritation : Cat. 2                                                                                                                                                                                                                                                      | Cat. I           | No AOPs available                                     | <a href="https://comptox.epa.gov/dashboard/dsstoxdb/results?search=DTXSID4023886#exec_sum">https://comptox.epa.gov/dashboard/dsstoxdb/results?search=DTXSID4023886#exec_sum</a> |
| DTXSID4064842 | Arsenic pentafluoride | 7784-36-3  | Compressed gas<br>Serious eye damage/eye irritation : Cat. 2<br>Carcinogenic : Cat. 1A                                                                                                                                                                                                                                | Cat. I           | No AOPs available                                     | <a href="https://comptox.epa.gov/dashboard/dsstoxdb/results?search=DTXSID4064842#exec_sum">https://comptox.epa.gov/dashboard/dsstoxdb/results?search=DTXSID4064842#exec_sum</a> |

|                |                      |           |                                                                                                                                                                                       |        |                                                                 |                                                                                                                                                                                   |
|----------------|----------------------|-----------|---------------------------------------------------------------------------------------------------------------------------------------------------------------------------------------|--------|-----------------------------------------------------------------|-----------------------------------------------------------------------------------------------------------------------------------------------------------------------------------|
|                |                      |           | Acute toxic(Oral) : Cat. 2<br>Skin corrosion/irritation : Cat. 1<br>Serious eye damage/eye irritation : Cat. 1                                                                        |        |                                                                 |                                                                                                                                                                                   |
|                | Arsenic trioxide     | 1327-53-3 | Carcinogenic : Cat. 1A<br>Specific target organ toxic(Single exposure) : Cat. 3(Respiratory system irritation)<br>Acute aquatic hazard : Cat. 1<br>Chronic aquatic hazard : Cat. 3    | Cat. I | <b>AOP Links: 187, 200</b>                                      | <a href="https://comptox.epa.gov/dashboard/dsstoxdb/results?search=DTXSID0020103#exec_sum">https://comptox.epa.gov/dashboard/dsstoxdb/results?search=DTXSID0020103#exec_sum</a>   |
| DTXSID50274153 | Arsenic(III) sulfide | 1303-33-9 | Acute toxic(Oral) : Cat. 3<br>Acute toxic(Dermal) : Cat. 3<br>Skin corrosion/irritation : Cat. 2<br>Serious eye damage/eye irritation : Cat. 2<br>Flammable liquid : Cat. 2           | Cat. I | No AOPs available                                               | <a href="https://comptox.epa.gov/dashboard/dsstoxdb/results?search=DTXSID50274153#exec_sum">https://comptox.epa.gov/dashboard/dsstoxdb/results?search=DTXSID50274153#exec_sum</a> |
| DTXSID3039242  | Benzene              | 71-43-2   | Skin corrosion/irritation : Cat. 2<br>Serious eye damage/eye irritation : Cat. 2                                                                                                      | Cat. I | No AOPs available                                               | <a href="https://comptox.epa.gov/dashboard/dsstoxdb/results?search=DTXSID3039242#exec_sum">https://comptox.epa.gov/dashboard/dsstoxdb/results?search=DTXSID3039242#exec_sum</a>   |
| DTXSID1023940  | Cadmium              | 7440-43-9 | Germ cell mutagenicity : Cat. 1R<br>Acute toxic(Oral) : Cat. 4<br>Acute toxic(Inhalation: Dust/Mist) : Cat. 1                                                                         | Cat. I | No AOPs available                                               | <a href="https://comptox.epa.gov/dashboard/dsstoxdb/results?search=DTXSID1023940#exec_sum">https://comptox.epa.gov/dashboard/dsstoxdb/results?search=DTXSID1023940#exec_sum</a>   |
| DTXSID0024715  | Cadmium oxide        | 1306-19-0 | Germ cell mutagenicity : Cat. 2<br>Acute toxic(Oral) : Cat. 4<br>Acute toxic(Inhalation: Dust/Mist) : Cat. 1                                                                          | Cat. I | No AOPs available                                               | <a href="https://comptox.epa.gov/dashboard/dsstoxdb/results?search=DTXSID0024715#exec_sum">https://comptox.epa.gov/dashboard/dsstoxdb/results?search=DTXSID0024715#exec_sum</a>   |
| DTXSID30893280 | Cadmium sulfide      | 1306-23-6 | Germ cell mutagenicity : Cat. 2<br>Carcinogenic : Cat. 1A                                                                                                                             | Cat. I | No AOPs available                                               | <a href="https://comptox.epa.gov/dashboard/dsstoxdb/results?search=DTXSID30893280#exec_sum">https://comptox.epa.gov/dashboard/dsstoxdb/results?search=DTXSID30893280#exec_sum</a> |
|                | Cadmium telluride    | 1306-25-8 | Acute toxic(Inhalation: Dust/Mist) : Cat. 4<br>Carcinogenic : Cat. 1A                                                                                                                 | Cat. I | No AOPs available                                               | <a href="https://comptox.epa.gov/dashboard/dsstoxdb/results?search=DTXSID0030950#exec_sum">https://comptox.epa.gov/dashboard/dsstoxdb/results?search=DTXSID0030950#exec_sum</a>   |
| DTXSID7051216  | Carbon black         | 1333-86-4 | Self-heating substances and mixtures : Cat. 1<br>Carcinogenic : Cat. 2                                                                                                                | Cat. I | No AOPs available                                               | <a href="https://comptox.epa.gov/dashboard/dsstoxdb/results?search=DTXSID7051216#exec_sum">https://comptox.epa.gov/dashboard/dsstoxdb/results?search=DTXSID7051216#exec_sum</a>   |
| DTXSID8020250  | Carbon tetrachloride | 56-23-5   | Skin sensitization : Cat. 1<br>Carcinogenic : Cat. 1B<br>Reproductive toxic : Cat. 2                                                                                                  | Cat. I | No AOPs available                                               | <a href="https://comptox.epa.gov/dashboard/dsstoxdb/results?search=DTXSID8020250#exec_sum">https://comptox.epa.gov/dashboard/dsstoxdb/results?search=DTXSID8020250#exec_sum</a>   |
| DTXSID3020257  | Catechol             | 120-80-9  | Specific target organ toxic(Single exposure) : Cat. 3<br>Acute toxic(Oral) : Cat. 3<br>Acute toxic(Dermal) : Cat. 3<br>Skin corrosion/irritation : Cat. 2<br>Oxidizing solid : Cat. 2 | Cat. I | <b>AOP Links: 58, 61, 66, 107, 150, 153, 163, 175, 187, 200</b> | <a href="https://comptox.epa.gov/dashboard/dsstoxdb/results?search=DTXSID3020257#exec_sum">https://comptox.epa.gov/dashboard/dsstoxdb/results?search=DTXSID3020257#exec_sum</a>   |
| DTXSID0040125  | Chromium trioxide    | 1333-82-0 | Acute toxic(Oral) : Cat. 3<br>Acute toxic(Dermal) : Cat. 2<br>Acute toxic(Inhalation: Dust/Mist) : Cat. 2<br>Serious eye damage/eye irritation : Cat. 2                               | Cat. I | No AOPs available                                               | <a href="https://comptox.epa.gov/dashboard/dsstoxdb/results?search=DTXSID0040125#exec_sum">https://comptox.epa.gov/dashboard/dsstoxdb/results?search=DTXSID0040125#exec_sum</a>   |
| DTXSID80892420 | Cobalt oxide (Co3O4) | 1308-06-1 | Carcinogenic : Cat. 1B<br>Specific target organ toxic(Single exposure) : Cat. 3(Respiratory system irritation)                                                                        | Cat. I | No AOPs available                                               | <a href="https://comptox.epa.gov/dashboard/dsstoxdb/results?search=DTXSID80892420#exec_sum">https://comptox.epa.gov/dashboard/dsstoxdb/results?search=DTXSID80892420#exec_sum</a> |
| DTXSID6051649  | Cobalt(II) oxide     | 1307-96-6 | Acute toxic(Oral) : Cat. 3<br>Acute toxic(Inhalation: Dust/Mist) : Cat. 2<br>Skin sensitization : Cat. 1<br>Carcinogenic : Cat. 2                                                     | Cat. I | No AOPs available                                               | <a href="https://comptox.epa.gov/dashboard/dsstoxdb/results?search=DTXSID6051649#exec_sum">https://comptox.epa.gov/dashboard/dsstoxdb/results?search=DTXSID6051649#exec_sum</a>   |

|               |                                    |            |                                                                                                                                                                                                                                                                                                                                                                                                                  |        |                           |                                                                                                                                                                                 |
|---------------|------------------------------------|------------|------------------------------------------------------------------------------------------------------------------------------------------------------------------------------------------------------------------------------------------------------------------------------------------------------------------------------------------------------------------------------------------------------------------|--------|---------------------------|---------------------------------------------------------------------------------------------------------------------------------------------------------------------------------|
| DTXSID5041801 | Cristobalite                       | 14464-46-1 | Skin sensitization : Cat. 1<br>Carcinogenic : Cat. 1A                                                                                                                                                                                                                                                                                                                                                            | Cat. I | No AOPs available         | <a href="https://comptox.epa.gov/dashboard/dsstoxdb/results?search=DTXSID5041801#exec_sum">https://comptox.epa.gov/dashboard/dsstoxdb/results?search=DTXSID5041801#exec_sum</a> |
|               | <b>Crystalline silica (Quartz)</b> | 14808-60-7 | Carcinogenic : Cat. 1A<br>Specific target organ toxic(Single exposure) : Cat. 3(Respiratory system irritation)                                                                                                                                                                                                                                                                                                   | Cat. I | No AOPs available         | <a href="https://comptox.epa.gov/dashboard/dsstoxdb/results?search=DTXSID3032040#exec_sum">https://comptox.epa.gov/dashboard/dsstoxdb/results?search=DTXSID3032040#exec_sum</a> |
| DTXSID6020359 | Cyclohexanone                      | 108-94-1   | Flammable liquid : Cat. 3<br>Acute toxic(Oral) : Cat. 4<br>Acute toxic(Dermal) : Cat. 4<br>Acute toxic(Inhalation: Vapor) : Cat. 3<br>Skin corrosion/irritation : Cat. 2                                                                                                                                                                                                                                         | Cat. I | No AOPs available         | <a href="https://comptox.epa.gov/dashboard/dsstoxdb/results?search=DTXSID6020359#exec_sum">https://comptox.epa.gov/dashboard/dsstoxdb/results?search=DTXSID6020359#exec_sum</a> |
|               | Dichloro methane                   | 75-09-2    | Serious eye damage/eye irritation : Cat. 2<br>Skin corrosion/irritation : Cat. 2<br>Serious eye damage/eye irritation : Cat. 2<br>Carcinogenic : Cat. 2<br>Specific target organ toxic(Single exposure) : Cat. 3(Anesthesia)<br>Acute toxic(Oral) : Cat. 4<br>Skin corrosion/irritation : Cat. 2                                                                                                                 | Cat. I | No AOPs available         | <a href="https://comptox.epa.gov/dashboard/dsstoxdb/results?search=DTXSID0020868#exec_sum">https://comptox.epa.gov/dashboard/dsstoxdb/results?search=DTXSID0020868#exec_sum</a> |
| DTXSID3021932 | Diethanolamine                     | 111-42-2   | Serious eye damage/eye irritation : Cat. 2<br>Carcinogenic : Cat. 2                                                                                                                                                                                                                                                                                                                                              | Cat. I | <b>AOP Links: 58, 200</b> | <a href="https://comptox.epa.gov/dashboard/dsstoxdb/results?search=DTXSID3021932#exec_sum">https://comptox.epa.gov/dashboard/dsstoxdb/results?search=DTXSID3021932#exec_sum</a> |
| DTXSID1024621 | Diethylene glycol dimethyl ether   | 111-96-6   | Flammable liquid : Cat. 3<br>Reproductive toxic : Cat. 1B                                                                                                                                                                                                                                                                                                                                                        | Cat. I | No AOPs available         | <a href="https://comptox.epa.gov/dashboard/dsstoxdb/results?search=DTXSID1024621#exec_sum">https://comptox.epa.gov/dashboard/dsstoxdb/results?search=DTXSID1024621#exec_sum</a> |
|               | Dimethylformamide                  | 68-12-2    | Flammable liquid : Cat. 3<br>Acute toxic(Inhalation: Vapor) : Cat. 3<br>Serious eye damage/eye irritation : Cat. 2                                                                                                                                                                                                                                                                                               | Cat. I | <b>AOP Links: 58</b>      | <a href="https://comptox.epa.gov/dashboard/dsstoxdb/results?search=DTXSID6020515#exec_sum">https://comptox.epa.gov/dashboard/dsstoxdb/results?search=DTXSID6020515#exec_sum</a> |
| DTXSID1020566 | Epichlorohydrin                    | 106-89-8   | Carcinogenic : Cat. 1B<br>Flammable liquid : Cat. 3<br>Acute toxic(Oral) : Cat. 3<br>Acute toxic(Dermal) : Cat. 3<br>Acute toxic(Inhalation: Vapor) : Cat. 3<br>Skin corrosion/irritation : Cat. 1                                                                                                                                                                                                               | Cat. I | <b>AOP Links: 187</b>     | <a href="https://comptox.epa.gov/dashboard/dsstoxdb/results?search=DTXSID1020566#exec_sum">https://comptox.epa.gov/dashboard/dsstoxdb/results?search=DTXSID1020566#exec_sum</a> |
| DTXSID9020584 | Ethanol                            | 64-17-5    | Flammable liquid : Cat. 2<br>Serious eye damage/eye irritation : Cat. 2<br>Carcinogenic : Cat. 1A                                                                                                                                                                                                                                                                                                                | Cat. I | No AOPs available         | <a href="https://comptox.epa.gov/dashboard/dsstoxdb/results?search=DTXSID9020584#exec_sum">https://comptox.epa.gov/dashboard/dsstoxdb/results?search=DTXSID9020584#exec_sum</a> |
| DTXSID3020596 | Ethylbenzene                       | 100-41-4   | Flammable liquid : Cat. 2<br>Acute toxic(Inhalation: Vapor) : Cat. 4<br>Skin corrosion/irritation : Cat. 2<br>Carcinogenic : Cat. 2<br>Specific target organ toxic(Single exposure) : Cat. 3(Respiratory system irritation)                                                                                                                                                                                      | Cat. I | No AOPs available         | <a href="https://comptox.epa.gov/dashboard/dsstoxdb/results?search=DTXSID3020596#exec_sum">https://comptox.epa.gov/dashboard/dsstoxdb/results?search=DTXSID3020596#exec_sum</a> |
| DTXSID0020600 | Ethylene oxide                     | 75-21-8    | Specific target organ toxic(Repeated)<br>Flammable gas : Cat. 1<br>Compressed gas: liqified gas<br>Acute toxic(Oral) : Cat. 3<br>Acute toxic(Inhalation: gas) : Cat. 3<br>Skin corrosion/irritation : Cat. 2<br>Serious eye damage/eye irritation : Cat. 2<br>Germ cell mutagenicity : Cat. 1B<br>Carcinogenic : Cat. 1A<br>Specific target organ toxic(Single exposure) : Cat. 3(Respiratory system irritation) | Cat. I | No AOPs available         | <a href="https://comptox.epa.gov/dashboard/dsstoxdb/results?search=DTXSID0020600#exec_sum">https://comptox.epa.gov/dashboard/dsstoxdb/results?search=DTXSID0020600#exec_sum</a> |

|               |                              |            |                                                                                                                                                                                                                                                                                                 |        |                       |                                                                                                                                                                                   |
|---------------|------------------------------|------------|-------------------------------------------------------------------------------------------------------------------------------------------------------------------------------------------------------------------------------------------------------------------------------------------------|--------|-----------------------|-----------------------------------------------------------------------------------------------------------------------------------------------------------------------------------|
| DTXSID7020637 | Formaldehyde                 | 50-00-0    | Flammable gas : Cat. 1<br>Acute toxic(Oral) : Cat. 3<br>Acute toxic(Dermal) : Cat. 3<br>Acute toxic(Inhalation: gas) : Cat. 2<br>Skin corrosion/irritation : Cat. 1<br>Serious eye damage/eye irritation : Cat. 1                                                                               | Cat. I | No AOPs available     | <a href="https://comptox.epa.gov/dashboard/dsstoxdb/results?search=DTXSID7020637#exec_sum">https://comptox.epa.gov/dashboard/dsstoxdb/results?search=DTXSID7020637#exec_sum</a>   |
|               |                              |            | Skin sensitization : Cat. 1<br>Germ cell mutagenicity : Cat. 2<br>Carcinogenic : Cat. 1A                                                                                                                                                                                                        |        |                       |                                                                                                                                                                                   |
|               | Gallium arsenide             | 1303-00-0  | Skin corrosion/irritation : Cat. 1<br>Carcinogenic : Cat. 1A<br>Specific target organ toxic(Repeated exposure) : Cat. 2<br>Chronic aquatic hazard : Cat. 3                                                                                                                                      | Cat. I | No AOPs available     | <a href="https://comptox.epa.gov/dashboard/dsstoxdb/results?search=DTXSID2023779#exec_sum">https://comptox.epa.gov/dashboard/dsstoxdb/results?search=DTXSID2023779#exec_sum</a>   |
| DTXSID3020702 | Hydrazine                    | 302-01-2   | Flammable liquid : Cat. 3<br>Acute toxic(Oral) : Cat. 3<br>Acute toxic(Inhalation: Vapor) : Cat. 2<br>Skin corrosion/irritation : Cat. 1<br>Skin sensitization : Cat. 1<br>Carcinogenic : Cat. 1B<br>Specific target organ toxic(Single Oxidizing liquid : Cat. 1<br>Acute toxic(Oral) : Cat. 4 | Cat. I | No AOPs available     | <a href="https://comptox.epa.gov/dashboard/dsstoxdb/results?search=DTXSID3020702#exec_sum">https://comptox.epa.gov/dashboard/dsstoxdb/results?search=DTXSID3020702#exec_sum</a>   |
| DTXSID2020715 | Hydrogen peroxide            | 7722-84-1  | Skin corrosion/irritation : Cat. 1<br>Serious eye damage/eye irritation : Cat. 1                                                                                                                                                                                                                | Cat. I | No AOPs available     | <a href="https://comptox.epa.gov/dashboard/dsstoxdb/results?search=DTXSID2020715#exec_sum">https://comptox.epa.gov/dashboard/dsstoxdb/results?search=DTXSID2020715#exec_sum</a>   |
| DTXSID7041043 | Hydroxylamine                | 7803-49-8  | Carcinogenic : Cat. 2<br>Explosive substances: unstable<br>Metal corrosive : Cat. 1<br>Acute toxic(Oral) : Cat. 4<br>Acute toxic(Dermal) : Cat. 4<br>Skin corrosion/irritation : Cat. 2                                                                                                         | Cat. I | No AOPs available     | <a href="https://comptox.epa.gov/dashboard/dsstoxdb/results?search=DTXSID7041043#exec_sum">https://comptox.epa.gov/dashboard/dsstoxdb/results?search=DTXSID7041043#exec_sum</a>   |
| DTXSID3031444 | Indium(III) phosphide        | 22398-80-7 | Serious eye damage/eye irritation : Cat. 2<br>Skin corrosion/irritation : Cat. 2                                                                                                                                                                                                                | Cat. I | <b>AOP Links: 200</b> | <a href="https://comptox.epa.gov/dashboard/dsstoxdb/results?search=DTXSID3031444#exec_sum">https://comptox.epa.gov/dashboard/dsstoxdb/results?search=DTXSID3031444#exec_sum</a>   |
| DTXSID2024161 | Lead                         | 7439-92-1  | Serious eye damage/eye irritation : Cat. 2<br>Germ cell mutagenicity : Cat. 2<br>Carcinogenic : Cat. 2                                                                                                                                                                                          | Cat. I | No AOPs available     | <a href="https://comptox.epa.gov/dashboard/dsstoxdb/results?search=DTXSID2024161#exec_sum">https://comptox.epa.gov/dashboard/dsstoxdb/results?search=DTXSID2024161#exec_sum</a>   |
| DTXSID1093963 | Lead titanium oxide (PbTiO3) | 12060-00-3 | Reproductive toxic : Cat. 1A<br>Carcinogenic : Cat. 1B                                                                                                                                                                                                                                          | Cat. I | No AOPs available     | <a href="https://comptox.epa.gov/dashboard/dsstoxdb/results?search=DTXSID1093963#exec_sum">https://comptox.epa.gov/dashboard/dsstoxdb/results?search=DTXSID1093963#exec_sum</a>   |
|               | Lead zirconate titanate      | 12626-81-2 | Specific target organ toxic(Repeated exposure) : Cat. 4<br>Acute toxic(Inhalation: Dust/mist) : Cat. 4<br>Carcinogenic : Cat. 1B                                                                                                                                                                | Cat. I | No AOPs available     | <a href="https://comptox.epa.gov/dashboard/dsstoxdb/results?search=DTXSID00893914#exec_sum">https://comptox.epa.gov/dashboard/dsstoxdb/results?search=DTXSID00893914#exec_sum</a> |
| DTXSID0025498 | Lead(II) sulfide             | 1314-87-0  | Reproductive toxic : Cat. 1A<br>Carcinogenic : Cat. 1B                                                                                                                                                                                                                                          | Cat. I | No AOPs available     | <a href="https://comptox.epa.gov/dashboard/dsstoxdb/results?search=DTXSID0025498#exec_sum">https://comptox.epa.gov/dashboard/dsstoxdb/results?search=DTXSID0025498#exec_sum</a>   |
|               | Lead(II) telluride           | 1314-91-6  | Carcinogenic : Cat. 1B                                                                                                                                                                                                                                                                          | Cat. I | No AOPs available     | <a href="https://comptox.epa.gov/dashboard/dsstoxdb/results?search=DTXSID5061663#exec_sum">https://comptox.epa.gov/dashboard/dsstoxdb/results?search=DTXSID5061663#exec_sum</a>   |
| DTXSID2021731 | Methanol                     | 67-56-1    | Flammable liquid : Cat. 2<br>Acute toxic(Oral) : Cat. 3<br>Acute toxic(Dermal) : Cat. 3<br>Acute toxic(Inhalation: Vapor) : Cat. 3<br>Respiratory sensitization : Cat. 1<br>Skin sensitization : Cat. 1<br>Carcinogenic : Cat. 2                                                                | Cat. I | No AOPs available     | <a href="https://comptox.epa.gov/dashboard/dsstoxdb/results?search=DTXSID2021731#exec_sum">https://comptox.epa.gov/dashboard/dsstoxdb/results?search=DTXSID2021731#exec_sum</a>   |
| DTXSID2020925 | Nickel                       | 7440-02-0  | Specific target organ toxic(Single exposure) : Cat. 3(Respiratory system irritation)<br>Specific target organ toxic(Repeated exposure) : Cat. 1<br>Acute aquatic hazard : Cat. 1                                                                                                                | Cat. I | No AOPs available     | <a href="https://comptox.epa.gov/dashboard/dsstoxdb/results?search=DTXSID2020925#exec_sum">https://comptox.epa.gov/dashboard/dsstoxdb/results?search=DTXSID2020925#exec_sum</a>   |



|                |                                                                                    |            |                                                                                                                                                                                               |         |                                                                |                                                                                                                                                                                   |
|----------------|------------------------------------------------------------------------------------|------------|-----------------------------------------------------------------------------------------------------------------------------------------------------------------------------------------------|---------|----------------------------------------------------------------|-----------------------------------------------------------------------------------------------------------------------------------------------------------------------------------|
| DTXSID7025710  | Nickel (II) oxide                                                                  | 1313-99-1  | Carcinogenic : Cat. 1A                                                                                                                                                                        | Cat. I  | No AOPs available                                              | <a href="https://comptox.epa.gov/dashboard/dsstoxdb/results?search=DTXSID7025710#exec_sum">https://comptox.epa.gov/dashboard/dsstoxdb/results?search=DTXSID7025710#exec_sum</a>   |
| DTXSID0024212  | Nickel carbonyl                                                                    | 13463-39-3 | Specific target organ toxic(Repeated exposure) : Cat. 2<br>Flammable liquid : Cat. 2<br>Acute toxic(Inhalation: Vapor) : Cat. 4<br>Acute toxic(Oral) : Cat. 4<br>Acute toxic(Dermal) : Cat. 3 | Cat. I  | No AOPs available                                              | <a href="https://comptox.epa.gov/dashboard/dsstoxdb/results?search=DTXSID0024212#exec_sum">https://comptox.epa.gov/dashboard/dsstoxdb/results?search=DTXSID0024212#exec_sum</a>   |
| DTXSID3020964  | Nitrobenzene                                                                       | 98-95-3    | Acute toxic(Inhalation: Vapor) : Cat. 3<br>Carcinogenic : Cat. 2<br>Reproductive toxic : Cat. 2                                                                                               | Cat. I  | <b>AOP Links: 187, 200</b>                                     | <a href="https://comptox.epa.gov/dashboard/dsstoxdb/results?search=DTXSID3020964#exec_sum">https://comptox.epa.gov/dashboard/dsstoxdb/results?search=DTXSID3020964#exec_sum</a>   |
| DTXSID60888669 | Oxirane, 2,2'-(3,3',5,5'-tetramethyl[1,1'-biphenyl]-4,4'-diyl)bis(oxymethylene)bis | 85954-11-6 | Specific target organ toxic(Repeated exposure) : Cat. 2<br>GHS08: Serious Health Hazard GHS07: Health hazard                                                                                  | Cat. I  | No AOPs available                                              | <a href="https://comptox.epa.gov/dashboard/dsstoxdb/results?search=DTXSID60888669#exec_sum">https://comptox.epa.gov/dashboard/dsstoxdb/results?search=DTXSID60888669#exec_sum</a> |
| DTXSID3031864  | Perfluorooctanesulfonic acid                                                       | 1763-23-1  | Acute toxic(Oral) : Cat. 3<br>Acute toxic(Inhalation: Dust/Mist) : Cat. 2                                                                                                                     | Cat. I  | <b>AOP Links: 43, 58, 60, 66, 103, 107, 153, 163, 187, 200</b> | <a href="https://comptox.epa.gov/dashboard/dsstoxdb/results?search=DTXSID3031864#exec_sum">https://comptox.epa.gov/dashboard/dsstoxdb/results?search=DTXSID3031864#exec_sum</a>   |
|                | Perylene                                                                           | 198-55-0   | Carcinogenic : Cat. 1A<br>Chronic aquatic hazard : Cat. 4                                                                                                                                     | Cat. I  | No AOPs available                                              | <a href="https://comptox.epa.gov/dashboard/dsstoxdb/results?search=DTXSID4047753#exec_sum">https://comptox.epa.gov/dashboard/dsstoxdb/results?search=DTXSID4047753#exec_sum</a>   |
|                | Propyl 3,4,5-tris[[[6-diazo-5,6-dihydro-5-oxo-1-naphthyl]sulfonoyl]oxy]benzoate    | 73003-79-9 | Substances predicted as likely to meet criteria for category 1A or 1B<br>Flammable liquid : Cat. 2                                                                                            | Cat. I  | No AOPs available                                              | <a href="https://comptox.epa.gov/dashboard/dsstoxdb/results?search=DTXSID7072709#exec_sum">https://comptox.epa.gov/dashboard/dsstoxdb/results?search=DTXSID7072709#exec_sum</a>   |
| DTXSID9026051  | Stoddard solvent                                                                   | 8052-41-3  | Skin corrosion/irritation : Cat. 2<br>Germ cell mutagenicity : Cat. 1B<br>Carcinogenic : Cat. 1B                                                                                              | Cat. I  | No AOPs available                                              | <a href="https://comptox.epa.gov/dashboard/dsstoxdb/results?search=DTXSID9026051#exec_sum">https://comptox.epa.gov/dashboard/dsstoxdb/results?search=DTXSID9026051#exec_sum</a>   |
|                |                                                                                    |            | Metal corrosive : Cat. 1<br>Acute toxic(Inhalation: Dust/Mist) : Cat. 2                                                                                                                       |         |                                                                |                                                                                                                                                                                   |
| DTXSID5029683  | Sulfuric acid                                                                      | 7664-93-9  | Skin corrosion/irritation : Cat. 1<br>Serious eye damage/eye irritation : Cat. 1<br>Carcinogenic : Cat. 1A                                                                                    | Cat. I  | No AOPs available                                              | <a href="https://comptox.epa.gov/dashboard/dsstoxdb/results?search=DTXSID5029683#exec_sum">https://comptox.epa.gov/dashboard/dsstoxdb/results?search=DTXSID5029683#exec_sum</a>   |
|                |                                                                                    |            | Skin corrosion/irritation : Cat. 2<br>Serious eye damage/eye irritation : Cat. 2                                                                                                              |         |                                                                |                                                                                                                                                                                   |
| DTXSID2021319  | Tetrachloroethylene                                                                | 127-18-4   | Skin sensitization : Cat. 1<br>Carcinogenic : Cat. 1B<br>Specific target organ toxic(Single exposure) : Cat. 2<br>Serious eye damage/eye irritation : Cat. 1                                  | Cat. I  | <b>AOP Links: 200</b>                                          | <a href="https://comptox.epa.gov/dashboard/dsstoxdb/results?search=DTXSID2021319#exec_sum">https://comptox.epa.gov/dashboard/dsstoxdb/results?search=DTXSID2021319#exec_sum</a>   |
| DTXSID1021328  | Tetrahydrofuran                                                                    | 109-99-9   | Carcinogenic : Cat. 2<br>Specific target organ toxic(Single exposure) : Cat. 3(Respiratory system)                                                                                            | Cat. I  | <b>AOP Links: 60</b>                                           | <a href="https://comptox.epa.gov/dashboard/dsstoxdb/results?search=DTXSID1021328#exec_sum">https://comptox.epa.gov/dashboard/dsstoxdb/results?search=DTXSID1021328#exec_sum</a>   |
| DTXSID3021352  | Titanium dioxide                                                                   | 13463-67-7 | Carcinogenic : Cat. 2                                                                                                                                                                         | Cat. I  | No AOPs available                                              | <a href="https://comptox.epa.gov/dashboard/dsstoxdb/results?search=DTXSID3021352#exec_sum">https://comptox.epa.gov/dashboard/dsstoxdb/results?search=DTXSID3021352#exec_sum</a>   |
| DTXSID0021383  | Trichloroethylene                                                                  | 79-01-6    | Skin corrosion/irritation : Cat. 2<br>Serious eye damage/eye irritation : Cat. 2<br>GHS02: Flammable GHS05: Corrosive                                                                         | Cat. I  | No AOPs available                                              | <a href="https://comptox.epa.gov/dashboard/dsstoxdb/results?search=DTXSID0021383#exec_sum">https://comptox.epa.gov/dashboard/dsstoxdb/results?search=DTXSID0021383#exec_sum</a>   |
| DTXSID6020434  | (2E)-1,4-Dichlorobut-2-ene                                                         | 110-57-6   | GHS08: Serious Health Hazard GHS09: Acute toxicity (Inhalation: Vapor) : Cat. 4                                                                                                               | Cat. II | No AOPs available                                              | <a href="https://comptox.epa.gov/dashboard/dsstoxdb/results?search=DTXSID6020434#exec_sum">https://comptox.epa.gov/dashboard/dsstoxdb/results?search=DTXSID6020434#exec_sum</a>   |
| DTXSID0021381  | 1,1,1-Trichloroethane                                                              | 71-55-6    | Skin corrosion/irritation : Cat. 2<br>Flammable liquid : Cat. 2<br>Germ cell mutagenicity : Cat. 2<br>Specific target organ toxic(Single exposure) : Cat. 3(Anesthesia)                       | Cat. II | No AOPs available                                              | <a href="https://comptox.epa.gov/dashboard/dsstoxdb/results?search=DTXSID0021381#exec_sum">https://comptox.epa.gov/dashboard/dsstoxdb/results?search=DTXSID0021381#exec_sum</a>   |
| DTXSID8024991  | 1,2-Dichloroethylene                                                               | 540-59-0   | Specific target organ toxic(Single exposure) : Cat. 2<br>Flammable liquid : Cat. 3                                                                                                            | Cat. II | No AOPs available                                              | <a href="https://comptox.epa.gov/dashboard/dsstoxdb/results?search=DTXSID8024991#exec_sum">https://comptox.epa.gov/dashboard/dsstoxdb/results?search=DTXSID8024991#exec_sum</a>   |
| DTXSID7020978  | 1-Nitronaphthalene                                                                 | 86-57-7    | GHS02: Flammable GHS08: Serious Health Hazard GHS06: Acute Toxicity GHS09: Hazardous to the Environment Danger! According to the classification provided by companies to ECHA in CLP          | Cat. II | <b>AOP Links: 60, 107, 150, 163, 177, 195, 200</b>             | <a href="https://comptox.epa.gov/dashboard/dsstoxdb/results?search=DTXSID7020978#exec_sum">https://comptox.epa.gov/dashboard/dsstoxdb/results?search=DTXSID7020978#exec_sum</a>   |

|               |                                       |            |                                                                                                                                                                                                             |         |                                          |                                                                                                                                                                                 |
|---------------|---------------------------------------|------------|-------------------------------------------------------------------------------------------------------------------------------------------------------------------------------------------------------------|---------|------------------------------------------|---------------------------------------------------------------------------------------------------------------------------------------------------------------------------------|
| DTXSID1020980 | 1-Nitropropane                        | 108-03-2   | Flammable liquid : Cat. 3<br>Acute toxic(Oral) : Cat. 4<br>Acute toxic(Inhalation: Vapor) : Cat. 3                                                                                                          | Cat. II | <b>AOP Links: 150, 177</b>               | <a href="https://comptox.epa.gov/dashboard/dsstoxdb/results?search=DTXSID1020980#exec_sum">https://comptox.epa.gov/dashboard/dsstoxdb/results?search=DTXSID1020980#exec_sum</a> |
| DTXSID6027341 | 2-(2-Aminoethoxy)ethanol              | 929-06-6   | Acute toxic(Dermal) : Cat. 4<br>Skin corrosion/irritation : Cat. 1<br>Serious eye damage/eye irritation : Cat. 2<br>Acute toxic(Oral) : Cat. 4                                                              | Cat. II | <b>AOP Links: 107</b>                    | <a href="https://comptox.epa.gov/dashboard/dsstoxdb/results?search=DTXSID6027341#exec_sum">https://comptox.epa.gov/dashboard/dsstoxdb/results?search=DTXSID6027341#exec_sum</a> |
| DTXSID2021941 | 2-(2-Ethoxyethoxy)ethanol             | 111-90-0   | Acute toxic(Oral) : Cat. 4<br>Skin corrosion/irritation : Cat. 2<br>Flammable liquid : Cat. 3                                                                                                               | Cat. II | <b>AOP Links: 58</b>                     | <a href="https://comptox.epa.gov/dashboard/dsstoxdb/results?search=DTXSID2021941#exec_sum">https://comptox.epa.gov/dashboard/dsstoxdb/results?search=DTXSID2021941#exec_sum</a> |
| DTXSID7024087 | 2-Ethoxyethanol                       | 110-80-5   | Acute toxic(Inhalation: Vapor) : Cat. 4<br>Flammable liquid : Cat. 3<br>Acute toxic(Oral) : Cat. 4                                                                                                          | Cat. II | <b>AOP Links: 58</b>                     | <a href="https://comptox.epa.gov/dashboard/dsstoxdb/results?search=DTXSID7024087#exec_sum">https://comptox.epa.gov/dashboard/dsstoxdb/results?search=DTXSID7024087#exec_sum</a> |
| DTXSID5021916 | 2-Heptanone                           | 110-43-0   | Acute toxic(Inhalation: Vapor) : Cat. 4<br>Skin corrosion/irritation : Cat. 2<br>Flammable liquid : Cat. 3<br>Acute toxic(Inhalation: Vapor) : Cat. 4                                                       | Cat. II | <b>AOP Links: 36, 61, 187</b>            | <a href="https://comptox.epa.gov/dashboard/dsstoxdb/results?search=DTXSID5021916#exec_sum">https://comptox.epa.gov/dashboard/dsstoxdb/results?search=DTXSID5021916#exec_sum</a> |
| DTXSID5024182 | 2-Methoxyethanol                      | 109-86-4   | Reproductive toxic : Cat. 1B<br>Specific target organ toxic(Single exposure) : Cat. 1<br>Specific target organ toxic(Repeated exposure) : Cat. 1<br>Flammable liquid : Cat. 3<br>Acute toxic(Oral) : Cat. 4 | Cat. II | <b>AOP Links: 60, 200</b>                | <a href="https://comptox.epa.gov/dashboard/dsstoxdb/results?search=DTXSID5024182#exec_sum">https://comptox.epa.gov/dashboard/dsstoxdb/results?search=DTXSID5024182#exec_sum</a> |
| DTXSID2025553 | 2-Methoxyethyl acetate                | 110-49-6   | Acute toxic(Inhalation: Vapor) : Cat. 3<br>Serious eye damage/eye irritation : Cat. 2<br>Reproductive toxic : Cat. 1B<br>Acute toxic(Oral) : Cat. 4                                                         | Cat. II | No AOPs available                        | <a href="https://comptox.epa.gov/dashboard/dsstoxdb/results?search=DTXSID2025553#exec_sum">https://comptox.epa.gov/dashboard/dsstoxdb/results?search=DTXSID2025553#exec_sum</a> |
| DTXSID6020224 | 4-Butyrolactone                       | 96-48-0    | Serious eye damage/eye irritation : Cat. 2<br>Specific target organ toxic(Single exposure) : Cat. 3<br>Acute toxic(Inhalation: Dust/Mist) : Cat. 3                                                          | Cat. II | No AOPs available                        | <a href="https://comptox.epa.gov/dashboard/dsstoxdb/results?search=DTXSID6020224#exec_sum">https://comptox.epa.gov/dashboard/dsstoxdb/results?search=DTXSID6020224#exec_sum</a> |
| DTXSID5022510 | 4-Chloro-2-methylphenol               | 1570-64-5  | Acute toxic(Inhalation: Dust/Mist) : Cat. 3<br>Acute toxic(Oral) : Cat. 3<br>Acute toxic(Dermal) : Cat. 2                                                                                                   | Cat. II | <b>AOP Links: 187, 200</b>               | <a href="https://comptox.epa.gov/dashboard/dsstoxdb/results?search=DTXSID5022510#exec_sum">https://comptox.epa.gov/dashboard/dsstoxdb/results?search=DTXSID5022510#exec_sum</a> |
| DTXSID9034286 | 5-Chloro-2-methyl-3(2H)-isothiazolone | 26172-55-4 | Acute toxic(Inhalation: Dust/Mist) : Cat. 2<br>Skin corrosion/irritation : Cat. 1<br>Serious eye damage/eye irritation : Cat. 2<br>GHS07: Serious Health Hazard<br>Health hazard                            | Cat. II | <b>AOP Links: 60, 150, 187</b>           | <a href="https://comptox.epa.gov/dashboard/dsstoxdb/results?search=DTXSID9034286#exec_sum">https://comptox.epa.gov/dashboard/dsstoxdb/results?search=DTXSID9034286#exec_sum</a> |
|               | 9-Bromoanthracene                     | 1564-64-3  | Flammable liquid : Cat. 3<br>Metal corrosive : Cat. 1<br>Acute toxic(Dermal) : Cat. 4<br>Skin corrosion/irritation : Cat. 1<br>Serious eye damage/eye irritation : Cat. 1                                   | Cat. II | <b>AOP Links: 36, 107, 163, 187, 200</b> | <a href="https://comptox.epa.gov/dashboard/dsstoxdb/results?search=DTXSID6049224#exec_sum">https://comptox.epa.gov/dashboard/dsstoxdb/results?search=DTXSID6049224#exec_sum</a> |
| DTXSID5024394 | Acetic acid                           | 64-19-7    | Specific target organ toxic(Single exposure) : Cat. 1<br>Flammable liquid : Cat. 2<br>Acute toxic(Oral) : Cat. 4<br>Serious eye damage/eye irritation : Cat. 2                                              | Cat. II | <b>AOP Links: 36</b>                     | <a href="https://comptox.epa.gov/dashboard/dsstoxdb/results?search=DTXSID5024394#exec_sum">https://comptox.epa.gov/dashboard/dsstoxdb/results?search=DTXSID5024394#exec_sum</a> |
| DTXSID7020009 | Acetonitrile                          | 75-05-8    | Specific target organ toxic(Single exposure) : Cat. 3<br>Flammable liquid : Cat. 2<br>Acute toxic(Oral) : Cat. 4<br>Serious eye damage/eye irritation : Cat. 2                                              | Cat. II | No AOPs available                        | <a href="https://comptox.epa.gov/dashboard/dsstoxdb/results?search=DTXSID7020009#exec_sum">https://comptox.epa.gov/dashboard/dsstoxdb/results?search=DTXSID7020009#exec_sum</a> |

|                |                      |                                       |                                                                                                                                                                                                                                             |         |                                        |                                                                                                                                                                                                                                                                                                                                                                      |
|----------------|----------------------|---------------------------------------|---------------------------------------------------------------------------------------------------------------------------------------------------------------------------------------------------------------------------------------------|---------|----------------------------------------|----------------------------------------------------------------------------------------------------------------------------------------------------------------------------------------------------------------------------------------------------------------------------------------------------------------------------------------------------------------------|
| DTXSID1023867  | Aluminum phosphide   | 20859-73-8                            | Water-reactive substances and mixtures : Cat. 1                                                                                                                                                                                             | Cat. II | No AOPs available                      | <a href="https://comptox.epa.gov/dashboard/dsstoxdb/results?search=DTXSID1023867#exec_sum">https://comptox.epa.gov/dashboard/dsstoxdb/results?search=DTXSID1023867#exec_sum</a>                                                                                                                                                                                      |
| DTXSID0023872  | Ammonia              | 7664-41-7                             | Acute toxic(Oral) : Cat. 2<br>Flammable gas : Cat. 1<br>Compressed gas: liquified gas                                                                                                                                                       | Cat. II | No AOPs available                      | <a href="https://comptox.epa.gov/dashboard/dsstoxdb/results?search=DTXSID0023872#exec_sum">https://comptox.epa.gov/dashboard/dsstoxdb/results?search=DTXSID0023872#exec_sum</a>                                                                                                                                                                                      |
| DTXSID6050463  | Ammonium fluoride    | 12125-01-8                            | Acute toxic(Inhalation: gas) : Cat. 3<br>Acute toxic(Oral) : Cat. 3<br>Acute toxic(Inhalation: Dust/Mist) : Cat. 3                                                                                                                          | Cat. II | No AOPs available                      | <a href="https://comptox.epa.gov/dashboard/dsstoxdb/results?search=DTXSID6050463#exec_sum">https://comptox.epa.gov/dashboard/dsstoxdb/results?search=DTXSID6050463#exec_sum</a>                                                                                                                                                                                      |
|                | Ammonium persulfate  | 7727-54-0                             | Serious eye damage/eye irritation : Cat. 2<br>Oxidizing solid : Cat. 3<br>Acute toxic(Oral) : Cat. 4                                                                                                                                        | Cat. II | No AOPs available                      | <a href="https://comptox.epa.gov/dashboard/dsstoxdb/results?search=DTXSID9029691#exec_sum">https://comptox.epa.gov/dashboard/dsstoxdb/results?search=DTXSID9029691#exec_sum</a>                                                                                                                                                                                      |
| DTXSID3023760  | Arsine               | 7784-42-1                             | Skin corrosion/irritation : Cat. 2<br>Flammable gas : Cat. 1<br>Compressed gas: liquified gas                                                                                                                                               | Cat. II | No AOPs available                      | <a href="https://comptox.epa.gov/dashboard/dsstoxdb/results?search=DTXSID3023760#exec_sum">https://comptox.epa.gov/dashboard/dsstoxdb/results?search=DTXSID3023760#exec_sum</a>                                                                                                                                                                                      |
| DTXSID3023922  | Boron                | 7440-42-8                             | Acute toxic(Oral) : Cat. 4                                                                                                                                                                                                                  | Cat. II | No AOPs available                      | <a href="https://comptox.epa.gov/dashboard/dsstoxdb/results?search=DTXSID3023922#exec_sum">https://comptox.epa.gov/dashboard/dsstoxdb/results?search=DTXSID3023922#exec_sum</a>                                                                                                                                                                                      |
|                | Boron oxide          | 1303-86-2<br>12045-60-2<br>54566-73-3 | Acute toxic(Inhalation: Dust/Mist) : Cat. 4<br>Reproductive toxic : Cat. 1B<br>Specific target organ toxic(Single exposure) : Cat. 3(Respiratory system irritation)                                                                         | Cat. II | No AOPs available<br>No AOPs available | <a href="https://comptox.epa.gov/dashboard/dsstoxdb/results?search=DTXSID7034387#exec_sum">https://comptox.epa.gov/dashboard/dsstoxdb/results?search=DTXSID7034387#exec_sum</a><br><a href="https://comptox.epa.gov/dashboard/dsstoxdb/results?search=DTXSID00923402#exec_sum">https://comptox.epa.gov/dashboard/dsstoxdb/results?search=DTXSID00923402#exec_sum</a> |
| DTXSID2041676  | Boron trichloride    | 10294-34-5                            | Compressed gas: liquified gas<br>Acute toxic(Inhalation: gas) : Cat. 3<br>Skin corrosion/irritation : Cat. 1<br>Serious eye damage/eye irritation : Cat. 1                                                                                  | Cat. II | No AOPs available                      | <a href="https://comptox.epa.gov/dashboard/dsstoxdb/results?search=DTXSID2041676#exec_sum">https://comptox.epa.gov/dashboard/dsstoxdb/results?search=DTXSID2041676#exec_sum</a>                                                                                                                                                                                      |
| DTXSID7041677  | Boron trifluoride    | 7637-07-2                             | Specific target organ toxic(Single exposure) : Cat. 3(Respiratory system irritation)<br>Compressed gas<br>Acute toxic(Inhalation: gas) : Cat. 2<br>Skin corrosion/irritation : Cat. 1<br>Serious eye damage/eye irritation : Cat. 1         | Cat. II | No AOPs available                      | <a href="https://comptox.epa.gov/dashboard/dsstoxdb/results?search=DTXSID7041677#exec_sum">https://comptox.epa.gov/dashboard/dsstoxdb/results?search=DTXSID7041677#exec_sum</a>                                                                                                                                                                                      |
| DTXSID5027273  | Carbon monoxide      | 630-08-0                              | Flammable gas : Cat. 1<br>Compressed gas                                                                                                                                                                                                    | Cat. II | No AOPs available                      | <a href="https://comptox.epa.gov/dashboard/dsstoxdb/results?search=DTXSID5027273#exec_sum">https://comptox.epa.gov/dashboard/dsstoxdb/results?search=DTXSID5027273#exec_sum</a>                                                                                                                                                                                      |
| DTXSID6023949  | Carbonyl sulfide     | 463-58-1                              | Acute toxic(Inhalation: gas) : Cat. 3<br>Skin corrosion/irritation : Cat. 2<br>Oxidizing gas : Cat. 1                                                                                                                                       | Cat. II | No AOPs available                      | <a href="https://comptox.epa.gov/dashboard/dsstoxdb/results?search=DTXSID6023949#exec_sum">https://comptox.epa.gov/dashboard/dsstoxdb/results?search=DTXSID6023949#exec_sum</a>                                                                                                                                                                                      |
| DTXSID1020273  | Chlorine             | 7782-50-5                             | Compressed gas: liquified gas<br>Acute toxic(Oral) : Cat. 4<br>Acute toxic(Inhalation: gas) : Cat. 2<br>Skin corrosion/irritation : Cat. 1<br>Serious eye damage/eye irritation : Cat. 1                                                    | Cat. II | No AOPs available                      | <a href="https://comptox.epa.gov/dashboard/dsstoxdb/results?search=DTXSID1020273#exec_sum">https://comptox.epa.gov/dashboard/dsstoxdb/results?search=DTXSID1020273#exec_sum</a>                                                                                                                                                                                      |
| DTXSID90893948 | Chlorine trifluoride | 7790-91-2                             | Specific target organ toxic(Single exposure) : Cat. 3(Respiratory system irritation)<br>Specific target organ toxic(Repeated exposure) : Cat. 2<br>Acute aquatic hazard : Cat. 1<br>Oxidizing gas : Cat. 1<br>Compressed gas: liquified gas | Cat. II | No AOPs available                      | <a href="https://comptox.epa.gov/dashboard/dsstoxdb/results?search=DTXSID90893948#exec_sum">https://comptox.epa.gov/dashboard/dsstoxdb/results?search=DTXSID90893948#exec_sum</a>                                                                                                                                                                                    |
|                | Colophony            | 8050-09-7                             | Acute toxic(Inhalation: Dust/Mist) : Cat. 4<br>Specific target organ toxic(Repeated exposure) : Cat. 2                                                                                                                                      | Cat. II | No AOPs available                      | <a href="https://comptox.epa.gov/dashboard/dsstoxdb/results?search=DTXSID7027702#exec_sum">https://comptox.epa.gov/dashboard/dsstoxdb/results?search=DTXSID7027702#exec_sum</a>                                                                                                                                                                                      |

|                |                             |                                                            |                                                                                                                                                                                                                                                                                                                               |         |                                                                       |                                                                                                                                                                                                                                                                                                                                                                                                                                                                                                                                             |
|----------------|-----------------------------|------------------------------------------------------------|-------------------------------------------------------------------------------------------------------------------------------------------------------------------------------------------------------------------------------------------------------------------------------------------------------------------------------|---------|-----------------------------------------------------------------------|---------------------------------------------------------------------------------------------------------------------------------------------------------------------------------------------------------------------------------------------------------------------------------------------------------------------------------------------------------------------------------------------------------------------------------------------------------------------------------------------------------------------------------------------|
| DTXSID2023985  | Copper                      | 7440-50-8                                                  | Acute toxic(Oral) : Cat. 4<br>Specific target organ toxic(Single exposure) : Cat. 3(Respiratory system irritation)<br>Acute aquatic hazard : Cat. 1                                                                                                                                                                           | Cat. II | No AOPs available                                                     | <a href="https://comptox.epa.gov/dashboard/dsstoxdb/results?search=DTXSID2023985#exec_sum">https://comptox.epa.gov/dashboard/dsstoxdb/results?search=DTXSID2023985#exec_sum</a>                                                                                                                                                                                                                                                                                                                                                             |
|                | Cresol                      | o-Cresol 95-48-7<br>p-Cresol 106-44-5<br>m-Cresol 108-39-4 | Acute toxic(Oral) : Cat. 3<br>Acute toxic(Dermal) : Cat. 4<br>Skin corrosion/irritation : Cat. 1<br>Serious eye damage/eye irritation : Cat. 1<br>Specific target organ toxic(Single exposure) : Cat. 3(Respiratory system irritation)                                                                                        | Cat. II | <b>AOP Links: 61</b><br><b>AOP Links: 58</b><br><b>AOP Links: 175</b> | <a href="https://comptox.epa.gov/dashboard/dsstoxdb/results?search=DTXSID8021808#exec_sum">https://comptox.epa.gov/dashboard/dsstoxdb/results?search=DTXSID8021808#exec_sum</a><br><a href="https://comptox.epa.gov/dashboard/dsstoxdb/results?search=DTXSID7021869#exec_sum">https://comptox.epa.gov/dashboard/dsstoxdb/results?search=DTXSID7021869#exec_sum</a><br><a href="https://comptox.epa.gov/dashboard/dsstoxdb/results?search=108-39-4#exec_sum">https://comptox.epa.gov/dashboard/dsstoxdb/results?search=108-39-4#exec_sum</a> |
| DTXSID80880049 | Decaborane                  | 17702-41-9                                                 | Flammable solid : Cat. 1<br>Acute toxic(Oral) : Cat. 4<br>Flammable gas : Cat. 1                                                                                                                                                                                                                                              | Cat. II | No AOPs available                                                     | <a href="https://comptox.epa.gov/dasboard/dsstoxdb/results?search=U1X5IU8U88UU49#exec_sum">https://comptox.epa.gov/dasboard/dsstoxdb/results?search=U1X5IU8U88UU49#exec_sum</a>                                                                                                                                                                                                                                                                                                                                                             |
| DTXSID9024938  | Diborane                    | 19287-45-7                                                 | Compressed gas: liqified gas<br>Acute toxic(Inhalation: gas) : Cat. 1<br>Skin corrosion/irritation : Cat. 1<br>Flammable gas : Cat. 1                                                                                                                                                                                         | Cat. II | No AOPs available                                                     | <a href="https://comptox.epa.gov/dashboard/dsstoxdb/results?search=DTXSID9024938#exec_sum">https://comptox.epa.gov/dashboard/dsstoxdb/results?search=DTXSID9024938#exec_sum</a>                                                                                                                                                                                                                                                                                                                                                             |
|                | Dichloro silane             | 4109-96-0                                                  | Compressed gas: liqified gas<br>Acute toxic(Inhalation: gas) : Cat. 2<br>Serious eye damage/eye irritation : Cat. 2                                                                                                                                                                                                           | Cat. II | No AOPs available                                                     | <a href="https://comptox.epa.gov/dashboard/dsstoxdb/results?search=DTXSID1052082#exec_sum">https://comptox.epa.gov/dashboard/dsstoxdb/results?search=DTXSID1052082#exec_sum</a>                                                                                                                                                                                                                                                                                                                                                             |
| DTXSID2044472  | Diethyl oxalate             | 95-92-1                                                    | Specific target organ toxic(Single exposure) : Cat. 3(Respiratory system<br>Acute toxic(Oral) : Cat. 4<br>Skin corrosion/irritation : Cat. 2<br>Serious eye damage/eye irritation : Cat. 2                                                                                                                                    | Cat. II | No AOPs available                                                     | <a href="https://comptox.epa.gov/dashboard/dsstoxdb/results?search=DTXSID2044472#exec_sum">https://comptox.epa.gov/dashboard/dsstoxdb/results?search=DTXSID2044472#exec_sum</a>                                                                                                                                                                                                                                                                                                                                                             |
|                | Difluoromethane             | 75-10-5                                                    | Specific target organ toxic(Single exposure) : Cat. 3(Respiratory system<br>Flammable gas : Cat. 1<br>Flammable aerosol : Cat. 1<br>Compressed gas: liqified gas<br>Acute toxic(Oral) : Cat. 4<br>Skin corrosion/irritation : Cat. 2<br>Serious eye damage/eye irritation : Cat. 2<br>Acute toxic(Inhalation: Vapor) : Cat. 3 | Cat. II | No AOPs available                                                     | <a href="https://comptox.epa.gov/dashboard/dsstoxdb/results?search=DTXSID6029597#exec_sum">https://comptox.epa.gov/dashboard/dsstoxdb/results?search=DTXSID6029597#exec_sum</a>                                                                                                                                                                                                                                                                                                                                                             |
|                | Dimethyl acetamide          | 127-19-5                                                   | Serious eye damage/eye irritation : Cat. 2                                                                                                                                                                                                                                                                                    | Cat. II | <b>AOP Links: 60, 200</b>                                             | <a href="https://comptox.epa.gov/dashboard/dsstoxdb/results?search=DTXSID5020499#exec_sum">https://comptox.epa.gov/dashboard/dsstoxdb/results?search=DTXSID5020499#exec_sum</a>                                                                                                                                                                                                                                                                                                                                                             |
| DTXSID7052494  | Dimethylamine-borane (1:1)  | 74-94-2                                                    | Acute toxic(Oral) : Cat. 3<br>Acute toxic(Dermal) : Cat. 3                                                                                                                                                                                                                                                                    | Cat. II | No AOPs available                                                     | <a href="https://comptox.epa.gov/dashboard/dsstoxdb/results?search=DTXSID7052494#exec_sum">https://comptox.epa.gov/dashboard/dsstoxdb/results?search=DTXSID7052494#exec_sum</a>                                                                                                                                                                                                                                                                                                                                                             |
| DTXSID6022000  | Ethanolamine                | 141-43-5                                                   | Acute toxic(Oral) : Cat. 4<br>Skin corrosion/irritation : Cat. 1<br>Serious eye damage/eye irritation : Cat. 1                                                                                                                                                                                                                | Cat. II | No AOPs available                                                     | <a href="https://comptox.epa.gov/dashboard/dsstoxdb/results?search=DTXSID6022000#exec_sum">https://comptox.epa.gov/dashboard/dsstoxdb/results?search=DTXSID6022000#exec_sum</a>                                                                                                                                                                                                                                                                                                                                                             |
| DTXSID3024106  | Fluorine                    | 7782-41-4                                                  | Oxidizing gas : Cat. 1<br>Compressed gas                                                                                                                                                                                                                                                                                      | Cat. II | No AOPs available                                                     | <a href="https://comptox.epa.gov/dashboard/dsstoxdb/results?search=DTXSID3024106#exec_sum">https://comptox.epa.gov/dashboard/dsstoxdb/results?search=DTXSID3024106#exec_sum</a>                                                                                                                                                                                                                                                                                                                                                             |
| DTXSID7052521  | Germanium tetrahydride      | 7782-65-2                                                  | Compressed gas: liqified gas<br>Acute toxic(Oral) : Cat. 4<br>Oxidizing gas : Cat. 1                                                                                                                                                                                                                                          | Cat. II | No AOPs available                                                     | <a href="https://comptox.epa.gov/dashboard/dsstoxdb/results?search=DTXSID7052521#exec_sum">https://comptox.epa.gov/dashboard/dsstoxdb/results?search=DTXSID7052521#exec_sum</a>                                                                                                                                                                                                                                                                                                                                                             |
| DTXSID00999041 | Hexafluoro-lambda-6--selane | 7783-79-1                                                  | Compressed gas                                                                                                                                                                                                                                                                                                                | Cat. II | No AOPs available                                                     | <a href="https://comptox.epa.gov/dashboard/dsstoxdb/results?search=DTXSID00999041#exec_sum">https://comptox.epa.gov/dashboard/dsstoxdb/results?search=DTXSID00999041#exec_sum</a>                                                                                                                                                                                                                                                                                                                                                           |
| DTXSID2025395  | Hexamethyldisilazane        | 999-97-3                                                   | Acute toxic(Oral) : Cat. 1<br>Flammable liquid : Cat. 2<br>Acute toxic(Oral) : Cat. 4<br>Acute toxic(Dermal) : Cat. 3<br>Acute toxic(Inhalation: Vapor) : Cat. 3                                                                                                                                                              | Cat. II | <b>AOP Links: 66, 187, 200</b>                                        | <a href="https://comptox.epa.gov/dashboard/dsstoxdb/results?search=999-97-3#exec_sum">https://comptox.epa.gov/dashboard/dsstoxdb/results?search=999-97-3#exec_sum</a>                                                                                                                                                                                                                                                                                                                                                                       |

|                |                                    |                                                     |                                                                                                                                                                                                                                                                                                  |         |                   |                                                                                                                                                                                   |
|----------------|------------------------------------|-----------------------------------------------------|--------------------------------------------------------------------------------------------------------------------------------------------------------------------------------------------------------------------------------------------------------------------------------------------------|---------|-------------------|-----------------------------------------------------------------------------------------------------------------------------------------------------------------------------------|
| DTXSID0029713  | Hydrobromic acid                   | 10035-10-6                                          | Compressed gas: liquified gas<br>Acute toxic(Oral) : Cat. 3<br>Acute toxic(Inhalation: Vapor) : Cat. 3<br>Skin corrosion/irritation : Cat. 1<br>Serious eye damage/eye irritation : Cat. 1                                                                                                       | Cat. II | No AOPs available | <a href="https://comptox.epa.gov/dashboard/dsstoxdb/results?search=DTXSID0029713#exec_sum">https://comptox.epa.gov/dashboard/dsstoxdb/results?search=DTXSID0029713#exec_sum</a>   |
| DTXSID2020711  | Hydrochloric acid                  | 7647-01-0                                           | Compressed gas: liquified gas<br>Acute toxic(Oral) : Cat. 3<br>Metal corrosive : Cat. 1                                                                                                                                                                                                          | Cat. II | No AOPs available | <a href="https://comptox.epa.gov/dashboard/dsstoxdb/results?search=DTXSID2020711#exec_sum">https://comptox.epa.gov/dashboard/dsstoxdb/results?search=DTXSID2020711#exec_sum</a>   |
| DTXSID1049641  | Hydrogen fluoride                  | 7664-39-3<br>24993-08-6<br>74835-81-7<br>74835-82-8 | Acute toxic(Dermal) : Cat. 1<br>Acute toxic(Inhalation: gas) : Cat. 2<br>Skin corrosion/irritation : Cat. 1<br>Serious eye damage/eye irritation : Cat. 1                                                                                                                                        | Cat. II | No AOPs available | <a href="https://comptox.epa.gov/dashboard/dsstoxdb/results?search=DTXSID1049641#exec_sum">https://comptox.epa.gov/dashboard/dsstoxdb/results?search=DTXSID1049641#exec_sum</a>   |
| DTXSID20872822 | Hydrogen selenide                  | 7783-07-5                                           | Flammable gas : Cat. 1<br>Compressed gas: liquified gas<br>Acute toxic(Oral) : Cat. 1<br>Acute toxic(Inhalation: gas) : Cat. 1<br>Specific target organ toxic(Repeated exposure) : Cat. 2<br>Acute aquatic hazard : Cat. 1<br>Chronic aquatic hazard : Cat. 1                                    | Cat. II | No AOPs available | <a href="https://comptox.epa.gov/dashboard/dsstoxdb/results?search=DTXSID20872822#exec_sum">https://comptox.epa.gov/dashboard/dsstoxdb/results?search=DTXSID20872822#exec_sum</a> |
| DTXSID4026422  | Methanesulfonic acid               | 75-75-2                                             | Acute toxic(Oral) : Cat. 4<br>Acute toxic(Dermal) : Cat. 4                                                                                                                                                                                                                                       | Cat. II | No AOPs available | <a href="https://comptox.epa.gov/dashboard/dsstoxdb/results?search=DTXSID4026422#exec_sum">https://comptox.epa.gov/dashboard/dsstoxdb/results?search=DTXSID4026422#exec_sum</a>   |
| DTXSID1068851  | Methanesulfonic acid, tin(2+) salt | 53408-94-9                                          | Acute toxic(Oral) : Cat. 4                                                                                                                                                                                                                                                                       | Cat. II | No AOPs available | <a href="https://comptox.epa.gov/dashboard/dsstoxdb/results?search=DTXSID1068851#exec_sum">https://comptox.epa.gov/dashboard/dsstoxdb/results?search=DTXSID1068851#exec_sum</a>   |
| DTXSID5025609  | Methyl formate                     | 107-31-3                                            | Flammable liquid : Cat. 1<br>Acute toxic(Oral) : Cat. 4<br>Acute toxic(Inhalation: Vapor) : Cat. 3<br>Acute toxic(Dermal) : Cat. 3<br>Skin corrosion/irritation : Cat. 1<br>Serious eye damage/eye irritation : Cat. 1                                                                           | Cat. II | No AOPs available | <a href="https://comptox.epa.gov/dashboard/dsstoxdb/results?search=DTXSID5025609#exec_sum">https://comptox.epa.gov/dashboard/dsstoxdb/results?search=DTXSID5025609#exec_sum</a>   |
| DTXSID7025423  | N-(Hydroxyethyl)ethylenediamine    | 111-41-1                                            | Skin sensitization : Cat. 1<br>Reproductive toxic : Cat. 1B<br>Chronic aquatic hazard : Cat. 3                                                                                                                                                                                                   | Cat. II | No AOPs available | <a href="https://comptox.epa.gov/dashboard/dsstoxdb/results?search=DTXSID7025423#exec_sum">https://comptox.epa.gov/dashboard/dsstoxdb/results?search=DTXSID7025423#exec_sum</a>   |
| DTXSID5029685  | Nitric acid                        | 7697-37-2                                           | Oxidizing liquid : Cat. 1<br>Metal corrosive : Cat. 1<br>Acute toxic(Inhalation: Vapor) : Cat. 3<br>Skin corrosion/irritation : Cat. 1<br>Serious eye damage/eye irritation : Cat. 1                                                                                                             | Cat. II | No AOPs available | <a href="https://comptox.epa.gov/dashboard/dsstoxdb/results?search=DTXSID5029685#exec_sum">https://comptox.epa.gov/dashboard/dsstoxdb/results?search=DTXSID5029685#exec_sum</a>   |
| DTXSID1020938  | Nitric oxide                       | 10102-43-9                                          | Oxidizing gas : Cat. 1                                                                                                                                                                                                                                                                           | Cat. II | No AOPs available | <a href="https://comptox.epa.gov/dashboard/dsstoxdb/results?search=DTXSID1020938#exec_sum">https://comptox.epa.gov/dashboard/dsstoxdb/results?search=DTXSID1020938#exec_sum</a>   |
| DTXSID4040181  | Nitrogen trifluoride               | 7783-54-2                                           | Compressed gas: liquified gas<br>Oxidizing gas : Cat. 1                                                                                                                                                                                                                                          | Cat. II | No AOPs available | <a href="https://comptox.epa.gov/dashboard/dsstoxdb/results?search=DTXSID4040181#exec_sum">https://comptox.epa.gov/dashboard/dsstoxdb/results?search=DTXSID4040181#exec_sum</a>   |
| DTXSID0021098  | Ozone                              | 10028-15-6                                          | Compressed gas<br>Oxidizing gas : Cat. 1<br>Acute toxic(Inhalation: gas) : Cat. 1<br>Skin corrosion/irritation : Cat. 2<br>Serious eye damage/eye irritation : Cat. 2<br>Germ cell mutagenicity : Cat. 2<br>Specific target organ toxic(Single exposure) : Cat. 3(Respiratory system irritation) | Cat. II | No AOPs available | <a href="https://comptox.epa.gov/dashboard/dsstoxdb/results?search=DTXSID0021098#exec_sum">https://comptox.epa.gov/dashboard/dsstoxdb/results?search=DTXSID0021098#exec_sum</a>   |

|                |                             |            |                                                                                                                                                                                          |         |                                                                            |                                                                                                                                                                                   |
|----------------|-----------------------------|------------|------------------------------------------------------------------------------------------------------------------------------------------------------------------------------------------|---------|----------------------------------------------------------------------------|-----------------------------------------------------------------------------------------------------------------------------------------------------------------------------------|
| DTXSID10880057 | Pentaborane(9)              | 19624-22-7 | Flammable liquid : Cat. 3<br>Autoignition liquid : Cat. 1<br>Acute toxic(Inhalation: Vapor) : Cat. 1<br>Skin corrosion/irritation : Cat. 2<br>Serious eye damage/eye irritation : Cat. 2 | Cat. II | No AOPs available                                                          | <a href="https://comptox.epa.gov/dashboard/dsstoxdb/results?search=DTXSID10880057#exec_sum">https://comptox.epa.gov/dashboard/dsstoxdb/results?search=DTXSID10880057#exec_sum</a> |
| DTXSID2025842  | Pentaerythritol triacrylate | 3524-68-3  | Acute toxic(Oral) : Cat. 4<br>Skin corrosion/irritation : Cat. 2<br>Serious eye damage/eye irritation : Cat. 2<br>Acute toxic(Inhalation: gas) : Cat. 1                                  | Cat. II | <b>AOP Links: 36, 43, 58, 59, 60, 61, 66, 107, 150, 153, 163, 187, 200</b> | <a href="https://comptox.epa.gov/dashboard/dsstoxdb/results?search=DTXSID2025842#exec_sum">https://comptox.epa.gov/dashboard/dsstoxdb/results?search=DTXSID2025842#exec_sum</a>   |
| DTXSID4073176  | Perfluoroisobutene          | 382-21-8   | Acute toxic(Inhalation: gas) : Cat. 1<br>Skin corrosion/irritation : Cat. 2                                                                                                              | Cat. II | No AOPs available                                                          | <a href="https://comptox.epa.gov/dashboard/dsstoxdb/results?search=DTXSID4073176#exec_sum">https://comptox.epa.gov/dashboard/dsstoxdb/results?search=DTXSID4073176#exec_sum</a>   |
| DTXSID5021124  | Phenol                      | 108-95-2   | Acute toxic(Oral) : Cat. 3<br>Acute toxic(Dermal) : Cat. 3                                                                                                                               | Cat. II | <b>AOP Links: 58, 200</b>                                                  | <a href="https://comptox.epa.gov/dashboard/dsstoxdb/results?search=DTXSID5021124#exec_sum">https://comptox.epa.gov/dashboard/dsstoxdb/results?search=DTXSID5021124#exec_sum</a>   |
| DTXSID2021157  | Phosphine                   | 7803-51-2  | Flammable gas : Cat. 1<br>Compressed gas<br>Acute toxic(Inhalation: gas) : Cat. 1<br>Acute aquatic hazard : Cat. 1                                                                       | Cat. II | No AOPs available                                                          | <a href="https://comptox.epa.gov/dashboard/dsstoxdb/results?search=DTXSID2021157#exec_sum">https://comptox.epa.gov/dashboard/dsstoxdb/results?search=DTXSID2021157#exec_sum</a>   |
| DTXSID5024263  | Phosphoric acid             | 7664-38-2  | Acute toxic(Inhalation: Dust/Mist) : Cat. 3<br>Skin corrosion/irritation : Cat. 1<br>Acute toxic(Oral) : Cat. 4                                                                          | Cat. II | <b>AOP Links: 187</b>                                                      | <a href="https://comptox.epa.gov/dashboard/dsstoxdb/results?search=DTXSID5024263#exec_sum">https://comptox.epa.gov/dashboard/dsstoxdb/results?search=DTXSID5024263#exec_sum</a>   |
| DTXSID5029710  | Phosphoric trichloride      | 10025-87-3 | Acute toxic(Dermal) : Cat. 3<br>Acute toxic(Oral) : Cat. 2                                                                                                                               | Cat. II | No AOPs available                                                          | <a href="https://comptox.epa.gov/dashboard/dsstoxdb/results?search=DTXSID5029710#exec_sum">https://comptox.epa.gov/dashboard/dsstoxdb/results?search=DTXSID5029710#exec_sum</a>   |
| DTXSID5029687  | Phosphorous trichloride     | 7719-12-2  | Acute toxic(Dermal) : Cat. 4<br>Acute toxic(Inhalation: Vapor) : Cat. 2                                                                                                                  | Cat. II | No AOPs available                                                          | <a href="https://comptox.epa.gov/dashboard/dsstoxdb/results?search=DTXSID5029687#exec_sum">https://comptox.epa.gov/dashboard/dsstoxdb/results?search=DTXSID5029687#exec_sum</a>   |
|                | Phosphorus (yellow)         | 12185-10-3 | Autoignition solid : Cat. 1<br>Acute toxic(Oral) : Cat. 1<br>Acute toxic(Dermal) : Cat. 1<br>Acute aquatic hazard : Cat. 1                                                               | Cat. II | No AOPs available                                                          | <a href="https://comptox.epa.gov/dashboard/dsstoxdb/results?search=DTXSID90923991#exec_sum">https://comptox.epa.gov/dashboard/dsstoxdb/results?search=DTXSID90923991#exec_sum</a> |
| DTXSID9047754  | Phosphorus pentoxide        | 1314-56-3  | Acute toxic(Inhalation: Dust/Mist) : Cat. 2<br>Skin corrosion/irritation : Cat. 4                                                                                                        | Cat. II | No AOPs available                                                          | <a href="https://comptox.epa.gov/dashboard/dsstoxdb/results?search=DTXSID9047754#exec_sum">https://comptox.epa.gov/dashboard/dsstoxdb/results?search=DTXSID9047754#exec_sum</a>   |
| DTXSID1021164  | Piperazine                  | 110-85-0   | Acute toxic(Oral) : Cat. 4<br>Acute toxic(Dermal) : Cat. 4                                                                                                                               | Cat. II | <b>AOP Links: 107, 187, 200</b>                                            | <a href="https://comptox.epa.gov/dashboard/dsstoxdb/results?search=DTXSID1021164#exec_sum">https://comptox.epa.gov/dashboard/dsstoxdb/results?search=DTXSID1021164#exec_sum</a>   |
|                | Polyethylene glycol         | 25322-68-3 | Acute toxic(Oral) : Cat. 4                                                                                                                                                               | Cat. II | No AOPs available                                                          | <a href="https://comptox.epa.gov/dashboard/dsstoxdb/results?search=DTXSID4027862#exec_sum">https://comptox.epa.gov/dashboard/dsstoxdb/results?search=DTXSID4027862#exec_sum</a>   |
| DTXSID5029633  | Potassium hydroxide         | 1310-58-3  | Metal corrosive : Cat. 1<br>Acute toxic(Oral) : Cat. 4<br>Flammable liquid : Cat. 3                                                                                                      | Cat. II | No AOPs available                                                          | <a href="https://comptox.epa.gov/dashboard/dsstoxdb/results?search=DTXSID5029633#exec_sum">https://comptox.epa.gov/dashboard/dsstoxdb/results?search=DTXSID5029633#exec_sum</a>   |
| DTXSID5021883  | Propargyl alcohol           | 107-19-7   | Acute toxic(Oral) : Cat. 3<br>Acute toxic(Dermal) : Cat. 3<br>Acute toxic(Inhalation: Vapor) : Cat. 2<br>Flammable gas : Cat. 1                                                          | Cat. II | <b>AOP Links: 177</b>                                                      | <a href="https://comptox.epa.gov/dashboard/dsstoxdb/results?search=DTXSID5021883#exec_sum">https://comptox.epa.gov/dashboard/dsstoxdb/results?search=DTXSID5021883#exec_sum</a>   |
| DTXSID6052534  | Silane                      | 7803-62-5  | Compressed gas<br>Acute toxic(Inhalation: gas) : Cat. 4<br>Skin corrosion/irritation : Cat. 2<br>Serious eye damage/eye irritation : Cat. 2                                              | Cat. II | No AOPs available                                                          | <a href="https://comptox.epa.gov/dashboard/dsstoxdb/results?search=DTXSID6052534#exec_sum">https://comptox.epa.gov/dashboard/dsstoxdb/results?search=DTXSID6052534#exec_sum</a>   |
| DTXSID0029711  | Silane, tetrachloro-        | 10026-04-7 | Specific target organ toxic(Single)<br>Metal corrosive : Cat. 1<br>Acute toxic(Inhalation: Vapor) : Cat. 4                                                                               | Cat. II | No AOPs available                                                          | <a href="https://comptox.epa.gov/dashboard/dsstoxdb/results?search=DTXSID0029711#exec_sum">https://comptox.epa.gov/dashboard/dsstoxdb/results?search=DTXSID0029711#exec_sum</a>   |

|                |                               |                                                                 |                                                                                                                                                                                                                                                                                                                                     |         |                       |                                                                                                                                                                                   |
|----------------|-------------------------------|-----------------------------------------------------------------|-------------------------------------------------------------------------------------------------------------------------------------------------------------------------------------------------------------------------------------------------------------------------------------------------------------------------------------|---------|-----------------------|-----------------------------------------------------------------------------------------------------------------------------------------------------------------------------------|
| DTXSID0029634  | Sodium hydroxide              | 1310-73-2                                                       | Metal corrosive : Cat. 1<br>Acute toxic(Oral) : Cat. 3<br>Acute toxic(Dermal) : Cat. 4<br>Skin corrosion/irritation : Cat. 1<br>Serious eye damage/eye irritation : Cat. 1                                                                                                                                                          | Cat. II | No AOPs available     | <a href="https://comptox.epa.gov/dashboard/dsstoxdb/results?search=DTXSID0029634#exec_sum">https://comptox.epa.gov/dashboard/dsstoxdb/results?search=DTXSID0029634#exec_sum</a>   |
| DTXSID2066723  | Stannous oxide                | 21651-19-4                                                      | Acute toxic(Oral) : Cat. 4<br>Serious eye damage/eye irritation : Cat. 2                                                                                                                                                                                                                                                            | Cat. II | No AOPs available     | <a href="https://comptox.epa.gov/dashboard/dsstoxdb/results?search=DTXSID2066723#exec_sum">https://comptox.epa.gov/dashboard/dsstoxdb/results?search=DTXSID2066723#exec_sum</a>   |
| DTXSID3027037  | Sulfolane                     | 126-33-0                                                        | Skin sensitization : Cat. 1<br>Specific target organ toxic(Single exposure) : Cat. 1<br>Acute toxic(Oral) : Cat. 4                                                                                                                                                                                                                  | Cat. II | No AOPs available     | <a href="https://comptox.epa.gov/dashboard/dsstoxdb/results?search=DTXSID3027037#exec_sum">https://comptox.epa.gov/dashboard/dsstoxdb/results?search=DTXSID3027037#exec_sum</a>   |
| DTXSID9032119  | Tellurium                     | 13494-80-9                                                      | Acute toxic(Inhalation: Dust/Mist) : Cat. 4<br>Skin sensitization : Cat. 1<br>Reproductive toxic : Cat. 1B                                                                                                                                                                                                                          | Cat. II | No AOPs available     | <a href="https://comptox.epa.gov/dashboard/dsstoxdb/results?search=DTXSID9032119#exec_sum">https://comptox.epa.gov/dashboard/dsstoxdb/results?search=DTXSID9032119#exec_sum</a>   |
| DTXSID3029108  | Tetramethylammonium hydroxide | 75-59-2<br>10424-66-5 (trihydrate)<br>10424-65-4 (pentahydrate) | Acute toxic(Oral) : Cat. 2<br>Acute toxic(Dermal) : Cat. 1<br>Skin corrosion/irritation : Cat. 1<br>Serious eye damage/eye irritation : Cat. 1<br>Chronic aquatic hazard : Cat. 2                                                                                                                                                   | Cat. II | <b>AOP Links: 200</b> | <a href="https://comptox.epa.gov/dashboard/dsstoxdb/results?search=DTXSID3029108#exec_sum">https://comptox.epa.gov/dashboard/dsstoxdb/results?search=DTXSID3029108#exec_sum</a>   |
| DTXSID2036035  | Thallium                      | 7440-28-0                                                       | Acute toxic(Oral) : Cat. 2<br>Skin corrosion/irritation : Cat. 2<br>Serious eye damage/eye irritation : Cat. 2<br>Germ cell mutagenicity : Cat. 2<br>Acute aquatic hazard : Cat. 1<br>Chronic aquatic hazard : Cat. 1                                                                                                               | Cat. II | No AOPs available     | <a href="https://comptox.epa.gov/dashboard/dsstoxdb/results?search=DTXSID2036035#exec_sum">https://comptox.epa.gov/dashboard/dsstoxdb/results?search=DTXSID2036035#exec_sum</a>   |
| DTXSID8042476  | Titanium tetrachloride        | 7550-45-0                                                       | Metal corrosive : Cat. 1<br>Acute toxic(Inhalation: Vapor) : Cat. 1<br>Serious eye damage/eye irritation : Cat. 2                                                                                                                                                                                                                   | Cat. II | No AOPs available     | <a href="https://comptox.epa.gov/dashboard/dsstoxdb/results?search=DTXSID8042476#exec_sum">https://comptox.epa.gov/dashboard/dsstoxdb/results?search=DTXSID8042476#exec_sum</a>   |
| DTXSID4029301  | Trichlorosilane               | 10025-78-2                                                      | Flammable liquid : Cat. 1<br>Water-reactive substances and mixtures : Cat. 1<br>Acute toxic(Oral) : Cat. 4<br>Acute toxic(Inhalation: Vapor) : Cat. 2                                                                                                                                                                               | Cat. II | No AOPs available     | <a href="https://comptox.epa.gov/dashboard/dsstoxdb/results?search=DTXSID4029301#exec_sum">https://comptox.epa.gov/dashboard/dsstoxdb/results?search=DTXSID4029301#exec_sum</a>   |
| DTXSID0037738  | Trimethyl borate              | 121-43-7                                                        | Flammable liquid : Cat. 2<br>Acute toxic(Dermal) : Cat. 4<br>Serious eye damage/eye irritation : Cat. 2                                                                                                                                                                                                                             | Cat. II | No AOPs available     | <a href="https://comptox.epa.gov/dashboard/dsstoxdb/results?search=DTXSID0037738#exec_sum">https://comptox.epa.gov/dashboard/dsstoxdb/results?search=DTXSID0037738#exec_sum</a>   |
| DTXSID1021403  | Trimethyl phosphate           | 512-56-1                                                        | Acute toxic(Oral) : Cat. 4<br>Skin corrosion/irritation : Cat. 2<br>Serious eye damage/eye irritation : Cat. 2<br>Germ cell mutagenicity : Cat. 2<br>Reproductive toxic : Cat. 2<br>Specific target organ toxic(Single exposure) : Cat. 3(Respiratory system irritation)<br>Specific target organ toxic(Repeated exposure) : Cat. 2 | Cat. II | <b>AOP Links: 60</b>  | <a href="https://comptox.epa.gov/dashboard/dsstoxdb/results?search=DTXSID1021403#exec_sum">https://comptox.epa.gov/dashboard/dsstoxdb/results?search=DTXSID1021403#exec_sum</a>   |
| DTXSID80893770 | Tungsten hexafluoride         | 7783-82-6                                                       | Compressed gas: liqified gas<br>Acute toxic(Inhalation: gas) : Cat. 2<br>Skin corrosion/irritation : Cat. 1<br>Serious eye damage/eye irritation : Cat. 1                                                                                                                                                                           | Cat. II | No AOPs available     | <a href="https://comptox.epa.gov/dashboard/dsstoxdb/results?search=DTXSID80893770#exec_sum">https://comptox.epa.gov/dashboard/dsstoxdb/results?search=DTXSID80893770#exec_sum</a> |

|                |                                                                          |            |                                                                                                                                                                                                                                       |          |                                                                                 |                                                                                                                                                                                   |
|----------------|--------------------------------------------------------------------------|------------|---------------------------------------------------------------------------------------------------------------------------------------------------------------------------------------------------------------------------------------|----------|---------------------------------------------------------------------------------|-----------------------------------------------------------------------------------------------------------------------------------------------------------------------------------|
| DTXSID2035013  | Zinc chloride                                                            | 7646-85-7  | Acute toxic(Oral) : Cat. 4<br>Skin corrosion/irritation : Cat. 1<br>Serious eye damage/eye irritation : Cat. 1<br>Germ cell mutagenicity : Cat. 2<br>Acute aquatic hazard : Cat. 1<br>Chronic aquatic hazard : Cat. 2                 | Cat. II  | <b>AOP Links: 58, 60, 61, 66, 124, 150, 187, 200</b>                            | <a href="https://comptox.epa.gov/dashboard/dsstoxdb/results?search=DTXSID2035013#exec_sum">https://comptox.epa.gov/dashboard/dsstoxdb/results?search=DTXSID2035013#exec_sum</a>   |
| DTXSID4068406  | 1,3,5-Triazine, 2-[2-(4-methoxyphenyl)ethenyl]-4,6-bis(trichloromethyl)- | 42573-57-9 | GHS07: Health hazard<br>Warning! According to the classification provided by companies to ECHA in CLP notifications this substance causes serious eye irritation, causes skin irritation and may cause respiratory irritation.        | Cat. III | No AOPs available                                                               | <a href="https://comptox.epa.gov/dashboard/dsstoxdb/results?search=DTXSID4068406#exec_sum">https://comptox.epa.gov/dashboard/dsstoxdb/results?search=DTXSID4068406#exec_sum</a>   |
| DTXSID1021740  | 1-Butanol                                                                | 71-36-3    | Flammable liquid : Cat. 3<br>Skin corrosion/irritation : Cat. 2<br>Serious eye damage/eye irritation : Cat. 2<br>Specific target organ toxic(Single exposure) : Cat. 3(Anesthesia)<br>Aspiration hazard : Cat. 2                      | Cat. III | <b>AOP Links: 200</b>                                                           | <a href="https://comptox.epa.gov/dashboard/dsstoxdb/results?search=DTXSID1021740#exec_sum">https://comptox.epa.gov/dashboard/dsstoxdb/results?search=DTXSID1021740#exec_sum</a>   |
| DTXSID6026905  | 2-(2-Ethoxyethoxy)ethyl acetate                                          | 112-15-2   | Skin corrosion/irritation : Cat. 2<br>Serious eye damage/eye irritation : Cat. 2                                                                                                                                                      | Cat. III | No AOPs available                                                               | <a href="https://comptox.epa.gov/dashboard/dsstoxdb/results?search=DTXSID6026905#exec_sum">https://comptox.epa.gov/dashboard/dsstoxdb/results?search=DTXSID6026905#exec_sum</a>   |
| DTXSID5049441  | 2-Methoxy-1-propanol                                                     | 1589-47-5  | Flammable liquid : Cat. 3<br>Skin corrosion/irritation : Cat. 2<br>Serious eye damage/eye irritation : Cat. 1<br>Reproductive toxic : Cat. 1B<br>Specific target organ toxic(Single exposure) : Cat. 3(Respiratory system irritation) | Cat. III | No AOPs available                                                               | <a href="https://comptox.epa.gov/dashboard/dsstoxdb/results?search=DTXSID5049441#exec_sum">https://comptox.epa.gov/dashboard/dsstoxdb/results?search=DTXSID5049441#exec_sum</a>   |
| DTXSID20168156 | 4,4'-Bis(chloromethyl)-1,1'-biphenyl                                     | 1667-10-3  | Warning! According to the classification provided by companies to ECHA in REACH registrations this substance may cause an allergic skin reaction.                                                                                     | Cat. III | No AOPs available                                                               | <a href="https://comptox.epa.gov/dashboard/dsstoxdb/results?search=DTXSID20168156#exec_sum">https://comptox.epa.gov/dashboard/dsstoxdb/results?search=DTXSID20168156#exec_sum</a> |
| DTXSID8021482  | Acetone                                                                  | 67-64-1    | Flammable liquid : Cat. 2<br>Serious eye damage/eye irritation : Cat. 2<br>Specific target organ toxic(Single exposure) : Cat. 3(Anesthesia)<br>Aspiration hazard : Cat. 2                                                            | Cat. III | <b>AOP Links: 187</b>                                                           | <a href="https://comptox.epa.gov/dashboard/dsstoxdb/results?search=DTXSID8021482#exec_sum">https://comptox.epa.gov/dashboard/dsstoxdb/results?search=DTXSID8021482#exec_sum</a>   |
| DTXSID7020182  | Bisphenol A                                                              | 80-05-7    | Serious eye damage/eye irritation : Cat. 1                                                                                                                                                                                            | Cat. III | <b>AOP Links: 13, 33, 36, 58, 60, 61, 66, 107, 124, 150, 163, 175, 187, 200</b> | <a href="https://comptox.epa.gov/dashboard/dsstoxdb/results?search=DTXSID7020182#exec_sum">https://comptox.epa.gov/dashboard/dsstoxdb/results?search=DTXSID7020182#exec_sum</a>   |



|                |                                                                           |            |                                                                                                                                                                                                                                                                                                                                                                                                                                                                                                                                                                                |          |                            |                                                                                                                                                                                   |
|----------------|---------------------------------------------------------------------------|------------|--------------------------------------------------------------------------------------------------------------------------------------------------------------------------------------------------------------------------------------------------------------------------------------------------------------------------------------------------------------------------------------------------------------------------------------------------------------------------------------------------------------------------------------------------------------------------------|----------|----------------------------|-----------------------------------------------------------------------------------------------------------------------------------------------------------------------------------|
| DTXSID0050479  | Bisphenol A/ Epichlorohydrin resin                                        | 25068-38-6 | Skin corrosion/irritation : Cat. 2<br>Serious eye damage/eye irritation : Cat. 2<br><br>Skin sensitization : Cat. 1<br>Chronic aquatic hazard : Cat. 2<br>GHS07: Health hazard GHS09:<br>Hazardous to the Environment<br>Warning! According to the classification provided by companies to ECHA in CLP notifications this substance is toxic to aquatic life with long lasting effects, causes serious eye irritation, causes skin irritation and may cause an allergic skin reaction.<br><br>Skin corrosion/irritation : Cat. 1<br>Serious eye damage/eye irritation : Cat. 2 | Cat. III | No AOPs available          | <a href="https://comptox.epa.gov/dashboard/dsstoxdb/results?search=DTXSID0050479#exec_sum">https://comptox.epa.gov/dashboard/dsstoxdb/results?search=DTXSID0050479#exec_sum</a>   |
| DTXSID50883204 | Bisphenol F diglycidyl ether                                              | 39817-09-9 | Specific target organ toxic(Single exposure) : Cat. 3(Respiratory system irritation)<br>Specific target organ toxic(Repeated exposure) : Cat. 2<br>Compressed gas: liqified gas<br>Skin corrosion/irritation : Cat. 2<br>Serious eye damage/eye irritation : Cat. 2                                                                                                                                                                                                                                                                                                            | Cat. III | No AOPs available          | <a href="https://comptox.epa.gov/dashboard/dsstoxdb/results?search=DTXSID50883204#exec_sum">https://comptox.epa.gov/dashboard/dsstoxdb/results?search=DTXSID50883204#exec_sum</a> |
| DTXSID4065028  | Boron tribromide                                                          | 10294-33-4 | Specific target organ toxic(Single exposure) : Cat. 3(Respiratory system irritation)<br>Specific target organ toxic(Repeated exposure) : Cat. 2<br>Compressed gas: liqified gas<br>Skin corrosion/irritation : Cat. 2<br>Serious eye damage/eye irritation : Cat. 2                                                                                                                                                                                                                                                                                                            | Cat. III | No AOPs available          | <a href="https://comptox.epa.gov/dashboard/dsstoxdb/results?search=DTXSID4065028#exec_sum">https://comptox.epa.gov/dashboard/dsstoxdb/results?search=DTXSID4065028#exec_sum</a>   |
| DTXSID2041757  | Carbon tetrafluoride                                                      | 75-73-0    | Specific target organ toxic(Single exposure) : Cat. 3(Respiratory system irritation)                                                                                                                                                                                                                                                                                                                                                                                                                                                                                           | Cat. III | No AOPs available          | <a href="https://comptox.epa.gov/dashboard/dsstoxdb/results?search=DTXSID2041757#exec_sum">https://comptox.epa.gov/dashboard/dsstoxdb/results?search=DTXSID2041757#exec_sum</a>   |
| DTXSID7051507  | Cyclohexyl methacrylate                                                   | 101-43-9   | Serious eye damage/eye irritation : Cat. 2                                                                                                                                                                                                                                                                                                                                                                                                                                                                                                                                     | Cat. III | No AOPs available          | <a href="https://comptox.epa.gov/dashboard/dsstoxdb/results?search=DTXSID7051507#exec_sum">https://comptox.epa.gov/dashboard/dsstoxdb/results?search=DTXSID7051507#exec_sum</a>   |
|                | Cyclotetrasiloxane, 2, 4, 6, 8-tetramethyl-2-[3-(oxiranylmethoxy)propyl]- | 61614-55-9 | GHS07: Health hazard<br>Warning! According to the classification provided by companies to ECHA in CLP notifications this substance may cause an allergic skin reaction.                                                                                                                                                                                                                                                                                                                                                                                                        | Cat. III | No AOPs available          | <a href="https://comptox.epa.gov/dashboard/dsstoxdb/results?search=DTXSID50886452#exec_sum">https://comptox.epa.gov/dashboard/dsstoxdb/results?search=DTXSID50886452#exec_sum</a> |
|                | Diethylene glycol monobutyl ether                                         | 112-34-5   | Serious eye damage/eye irritation : Cat. 2<br>Flammable liquid : Cat. 2<br>Serious eye damage/eye irritation : Cat. 2                                                                                                                                                                                                                                                                                                                                                                                                                                                          | Cat. III | <b>AOP Links: 153, 200</b> | <a href="https://comptox.epa.gov/dashboard/dsstoxdb/results?search=DTXSID8021519#exec_sum">https://comptox.epa.gov/dashboard/dsstoxdb/results?search=DTXSID8021519#exec_sum</a>   |
| DTXSID1022001  | Ethyl acetate                                                             | 141-78-6   | Specific target organ toxic(Single exposure) : Cat. 3(Anesthesia)<br>Specific target organ toxic(Single exposure) : Cat. 3(Respiratory system irritation)<br>Flammable liquid : Cat. 3<br>Skin corrosion/irritation : Cat. 2<br>Serious eye damage/eye irritation : Cat. 2                                                                                                                                                                                                                                                                                                     | Cat. III | <b>AOP Links: 60, 200</b>  | <a href="https://comptox.epa.gov/dashboard/dsstoxdb/results?search=DTXSID1022001#exec_sum">https://comptox.epa.gov/dashboard/dsstoxdb/results?search=DTXSID1022001#exec_sum</a>   |
| DTXSID6029127  | Ethyl lactate                                                             | 97-64-3    | Specific target organ toxic(Single exposure) : Cat. 3(Respiratory system irritation)                                                                                                                                                                                                                                                                                                                                                                                                                                                                                           | Cat. III | No AOPs available          | <a href="https://comptox.epa.gov/dashboard/dsstoxdb/results?search=DTXSID6029127#exec_sum">https://comptox.epa.gov/dashboard/dsstoxdb/results?search=DTXSID6029127#exec_sum</a>   |

|               |                              |            |                                                                                                                                                                                                                                                                                                                                                                                  |          |                                |                                                                                                                                                                                 |
|---------------|------------------------------|------------|----------------------------------------------------------------------------------------------------------------------------------------------------------------------------------------------------------------------------------------------------------------------------------------------------------------------------------------------------------------------------------|----------|--------------------------------|---------------------------------------------------------------------------------------------------------------------------------------------------------------------------------|
| DTXSID8020597 | Ethylene glycol              | 107-21-1   | Skin corrosion/irritation : Cat. 2<br>Serious eye damage/eye irritation : Cat. 2<br>Specific target organ toxic(Single exposure) : Cat. 2<br>Specific target organ toxic(Single exposure) : Cat. 3(Respiratory system irritation)<br>Specific target organ toxic(Repeated exposure) : Cat. 2<br>Skin corrosion/irritation : Cat. 2<br>Serious eye damage/eye irritation : Cat. 2 | Cat. III | <b>AOP Links: 187, 200</b>     | <a href="https://comptox.epa.gov/dashboard/dsstoxdb/results?search=DTXSID8020597#exec_sum">https://comptox.epa.gov/dashboard/dsstoxdb/results?search=DTXSID8020597#exec_sum</a> |
|               | FLUORIDES                    | 16984-48-8 | Reproductive toxic : Lactation<br>Reproductive toxic : Cat. 2<br>Specific target organ toxic(Single exposure) : Cat. 3(Respiratory system irritation)<br>Specific target organ toxic(Repeated exposure) : Cat. 2                                                                                                                                                                 | Cat. III | No AOPs available              | <a href="https://comptox.epa.gov/dashboard/dsstoxdb/results?search=DTXSID9049617#exec_sum">https://comptox.epa.gov/dashboard/dsstoxdb/results?search=DTXSID9049617#exec_sum</a> |
| DTXSID1044350 | Germanium tetrachloride      | 10038-98-9 | Metal corrosive : Cat. 1<br>Serious eye damage/eye irritation : Cat. 1                                                                                                                                                                                                                                                                                                           | Cat. III | No AOPs available              | <a href="https://comptox.epa.gov/dashboard/dsstoxdb/results?search=DTXSID1044350#exec_sum">https://comptox.epa.gov/dashboard/dsstoxdb/results?search=DTXSID1044350#exec_sum</a> |
|               | Germanium tetrafluoride      | 7783-58-6  | Flammable gas : Cat. 1<br>Metal corrosive : Cat. 1<br>Skin corrosion/irritation : Cat. 1<br>Serious eye damage/eye irritation : Cat. 1                                                                                                                                                                                                                                           | Cat. III | No AOPs available              | <a href="https://comptox.epa.gov/dashboard/dsstoxdb/results?search=DTXSID1064829#exec_sum">https://comptox.epa.gov/dashboard/dsstoxdb/results?search=DTXSID1064829#exec_sum</a> |
| DTXSID6024127 | Heptane                      | 142-82-5   | Flammable liquid : Cat. 2<br>Skin corrosion/irritation : Cat. 2<br>Specific target organ toxic(Single exposure) : Cat. 3(Anesthesia)<br>Specific target organ toxic(Single exposure) : Cat. 3(Respiratory system irritation)<br>Aspiration hazard : Cat. 1<br>Chronic aquatic hazard : Cat. 3<br>Flammable liquid : Cat. 2<br>Serious eye damage/eye irritation : Cat. 2         | Cat. III | <b>AOP Links: 187</b>          | <a href="https://comptox.epa.gov/dashboard/dsstoxdb/results?search=DTXSID6024127#exec_sum">https://comptox.epa.gov/dashboard/dsstoxdb/results?search=DTXSID6024127#exec_sum</a> |
| DTXSID7020762 | Isopropanol                  | 67-63-0    | Specific target organ toxic(Single exposure) : Cat. 3(Anesthesia)<br>Aspiration hazard : Cat. 2<br>Flammable liquid : Cat. 2<br>Serious eye damage/eye irritation : Cat. 2                                                                                                                                                                                                       | Cat. III | <b>AOP Links: 61, 153, 187</b> | <a href="https://comptox.epa.gov/dashboard/dsstoxdb/results?search=DTXSID7020762#exec_sum">https://comptox.epa.gov/dashboard/dsstoxdb/results?search=DTXSID7020762#exec_sum</a> |
| DTXSID3021516 | Methyl ethyl ketone          | 78-93-3    | Specific target organ toxic(Single exposure) : Cat. 3(Respiratory system irritation)<br>Aspiration hazard : Cat. 2<br>Flammable liquid : Cat. 3                                                                                                                                                                                                                                  | Cat. III | No AOPs available              | <a href="https://comptox.epa.gov/dashboard/dsstoxdb/results?search=DTXSID3021516#exec_sum">https://comptox.epa.gov/dashboard/dsstoxdb/results?search=DTXSID3021516#exec_sum</a> |
|               | Methyl-2-hydroxy isobutyrate | 2110-78-3  | Serious eye damage/eye irritation : Cat. 2<br>Chronic aquatic hazard : Cat. 4<br>Serious eye damage/eye irritation : Cat. 2                                                                                                                                                                                                                                                      | Cat. III | No AOPs available              | <a href="https://comptox.epa.gov/dashboard/dsstoxdb/results?search=DTXSID5062184#exec_sum">https://comptox.epa.gov/dashboard/dsstoxdb/results?search=DTXSID5062184#exec_sum</a> |
| DTXSID6020856 | N-Methyl-2-pyrrolidone       | 872-50-4   | Reproductive toxic : Cat. 1B<br>Specific target organ toxic(Single exposure) : Cat. 3(Respiratory system irritation)                                                                                                                                                                                                                                                             | Cat. III | <b>AOP Links: 153</b>          | <a href="https://comptox.epa.gov/dashboard/dsstoxdb/results?search=DTXSID6020856#exec_sum">https://comptox.epa.gov/dashboard/dsstoxdb/results?search=DTXSID6020856#exec_sum</a> |

|               |                           |           |                                                                                                                                                                                                                                                                                                            |          |                       |                                                                                                                                                                                 |
|---------------|---------------------------|-----------|------------------------------------------------------------------------------------------------------------------------------------------------------------------------------------------------------------------------------------------------------------------------------------------------------------|----------|-----------------------|---------------------------------------------------------------------------------------------------------------------------------------------------------------------------------|
| DTXSID9041811 | Octafluorocyclobutane     | 115-25-3  | Compressed gas: liqified gas<br>Skin corrosion/irritation : Cat. 2                                                                                                                                                                                                                                         | Cat. III | No AOPs available     | <a href="https://comptox.epa.gov/dashboard/dsstoxdb/results?search=DTXSID9041811#exec_sum">https://comptox.epa.gov/dashboard/dsstoxdb/results?search=DTXSID9041811#exec_sum</a> |
|               | Octamethyltrisiloxane     | 107-51-7  | Flammable liquid : Cat. 3<br>Serious eye damage/eye irritation : Cat. 2                                                                                                                                                                                                                                    | Cat. III | <b>AOP Links: 60</b>  | <a href="https://comptox.epa.gov/dashboard/dsstoxdb/results?search=DTXSID9040710#exec_sum">https://comptox.epa.gov/dashboard/dsstoxdb/results?search=DTXSID9040710#exec_sum</a> |
|               | Phenol-formaldehyde resin | 9003-35-4 | Chronic aquatic hazard : Cat. 4<br>Skin corrosion/irritation : Cat. 2<br>Serious eye damage/eye irritation : Cat. 2                                                                                                                                                                                        | Cat. III | No AOPs available     | <a href="https://comptox.epa.gov/dashboard/dsstoxdb/results?search=DTXSID2049713#exec_sum">https://comptox.epa.gov/dashboard/dsstoxdb/results?search=DTXSID2049713#exec_sum</a> |
|               | Phosphorus pentafluoride  | 7647-19-0 | Specific target organ toxic(Single exposure) : Cat. 3(Respiratory system irritation)<br>Skin corrosion/irritation : Cat. 1<br>Serious eye damage/eye irritation : Cat. 1                                                                                                                                   | Cat. III | No AOPs available     | <a href="https://comptox.epa.gov/dashboard/dsstoxdb/results?search=DTXSID9064760#exec_sum">https://comptox.epa.gov/dashboard/dsstoxdb/results?search=DTXSID9064760#exec_sum</a> |
| DTXSID7064869 | Phosphorus tribromide     | 7789-60-8 | Specific target organ toxic(Single exposure) : Cat. 2<br>Serious eye damage/eye irritation : Cat. 1                                                                                                                                                                                                        | Cat. III | No AOPs available     | <a href="https://comptox.epa.gov/dashboard/dsstoxdb/results?search=DTXSID7064869#exec_sum">https://comptox.epa.gov/dashboard/dsstoxdb/results?search=DTXSID7064869#exec_sum</a> |
| DTXSID9064681 | Platinum                  | 7440-06-4 | Skin corrosion/irritation : Cat. 2<br>Serious eye damage/eye irritation : Cat. 2                                                                                                                                                                                                                           | Cat. III | No AOPs available     | <a href="https://comptox.epa.gov/dashboard/dsstoxdb/results?search=DTXSID9064681#exec_sum">https://comptox.epa.gov/dashboard/dsstoxdb/results?search=DTXSID9064681#exec_sum</a> |
|               | Rubidium                  | 7440-17-7 | Water-reactive substances and mixtures : Cat. 1<br>Skin corrosion/irritation : Cat. 2<br>Serious eye damage/eye irritation : Cat. 2<br>Specific target organ toxic(Single exposure) : Cat. 2                                                                                                               | Cat. III | No AOPs available     | <a href="https://comptox.epa.gov/dashboard/dsstoxdb/results?search=DTXSID4064686#exec_sum">https://comptox.epa.gov/dashboard/dsstoxdb/results?search=DTXSID4064686#exec_sum</a> |
| DTXSID6026450 | Tetraethyl orthosilicate  | 78-10-4   | Flammable liquid : Cat. 3<br>Skin corrosion/irritation : Cat. 2                                                                                                                                                                                                                                            | Cat. III | No AOPs available     | <a href="https://comptox.epa.gov/dashboard/dsstoxdb/results?search=DTXSID6026450#exec_sum">https://comptox.epa.gov/dashboard/dsstoxdb/results?search=DTXSID6026450#exec_sum</a> |
| DTXSID7021360 | Toluene                   | 108-88-3  | Flammable liquid : Cat. 2<br>Skin corrosion/irritation : Cat. 2<br>Reproductive toxic : Cat. 2<br>Specific target organ toxic(Single exposure) : Cat. 3(Anesthesia)<br>Specific target organ toxic(Repeated exposure) : Cat. 2<br>Aspiration hazard : Cat. 1<br>Serious eye damage/eye irritation : Cat. 1 | Cat. III | No AOPs available     | <a href="https://comptox.epa.gov/dashboard/dsstoxdb/results?search=DTXSID7021360#exec_sum">https://comptox.epa.gov/dashboard/dsstoxdb/results?search=DTXSID7021360#exec_sum</a> |
| DTXSID7026235 | Trimellitic anhydride     | 552-30-7  | Respiratory sensitization : Cat. 1<br>Skin sensitization : Cat. 1<br>Specific target organ toxic(Single exposure) : Cat. 3(Respiratory system irritation)                                                                                                                                                  | Cat. III | <b>AOP Links: 200</b> | <a href="https://comptox.epa.gov/dashboard/dsstoxdb/results?search=DTXSID7026235#exec_sum">https://comptox.epa.gov/dashboard/dsstoxdb/results?search=DTXSID7026235#exec_sum</a> |

|               |                                 |            |                                                                                                                                                                                                                                                                                                           |          |                                                                             |                                                                                                                                                                                 |
|---------------|---------------------------------|------------|-----------------------------------------------------------------------------------------------------------------------------------------------------------------------------------------------------------------------------------------------------------------------------------------------------------|----------|-----------------------------------------------------------------------------|---------------------------------------------------------------------------------------------------------------------------------------------------------------------------------|
|               | Trimethylaluminum               | 75-24-1    | <p>Autoignition liquid : Cat. 1<br/> Water-reactive substances and mixtures : Cat. 1<br/> Skin corrosion/irritation : Cat. 1<br/> Serious eye damage/eye irritation : Cat. 1</p> <p>Flammable liquid : Cat. 2<br/> Skin corrosion/irritation : Cat. 2<br/> Serious eye damage/eye irritation : Cat. 2</p> | Cat. III | No AOPs available                                                           | <a href="https://comptox.epa.gov/dashboard/dsstoxdb/results?search=DTXSID9058787#exec_sum">https://comptox.epa.gov/dashboard/dsstoxdb/results?search=DTXSID9058787#exec_sum</a> |
| DTXSID2021446 | Xylenes                         | 1330-20-7  | <p>Specific target organ toxic(Single exposure) : Cat. 3(Anesthesia)<br/> Specific target organ toxic(Single exposure) : Cat. 3(Respiratory system irritation)<br/> Aspiration hazard : Cat. 1</p>                                                                                                        | Cat. III | No AOPs available                                                           | <a href="https://comptox.epa.gov/dashboard/dsstoxdb/results?search=DTXSID2021446#exec_sum">https://comptox.epa.gov/dashboard/dsstoxdb/results?search=DTXSID2021446#exec_sum</a> |
| DTXSID1026796 | 1-Methoxy-2-propyl acetate      | 108-65-6   | <p>Flammable liquid : Cat. 3<br/> Specific target organ toxic(Single exposure) : Cat. 3(Anesthesia)<br/> Specific target organ toxic(Single exposure) : Cat. 3(Respiratory system irritation)</p>                                                                                                         | Cat. IV  | <b>AOP Links: 150, 187</b>                                                  | <a href="https://comptox.epa.gov/dashboard/dsstoxdb/results?search=DTXSID1026796#exec_sum">https://comptox.epa.gov/dashboard/dsstoxdb/results?search=DTXSID1026796#exec_sum</a> |
| DTXSID5021205 | 1-Propene                       | 115-07-1   | <p>Flammable gas : Cat. 1<br/> Compressed gas: liquified gas<br/> Specific target organ toxic(Single exposure) : Cat. 3(Anesthesia)</p>                                                                                                                                                                   | Cat. IV  | No AOPs available                                                           | <a href="https://comptox.epa.gov/dashboard/dsstoxdb/results?search=DTXSID5021205#exec_sum">https://comptox.epa.gov/dashboard/dsstoxdb/results?search=DTXSID5021205#exec_sum</a> |
| DTXSID5041433 | 2-Methoxy-1-propyl acetate      | 70657-70-4 | <p>Reproductive toxic : Cat. 1B<br/> Specific target organ toxic(Single exposure) : Cat. 3(Respiratory system irritation)</p>                                                                                                                                                                             | Cat. IV  | No AOPs available                                                           | <a href="https://comptox.epa.gov/dashboard/dsstoxdb/results?search=DTXSID5041433#exec_sum">https://comptox.epa.gov/dashboard/dsstoxdb/results?search=DTXSID5041433#exec_sum</a> |
| DTXSID1026081 | 3,3',5,5'-Tetrabromobisphenol A | 79-94-7    | <p>Specific target organ toxic(Single exposure) : Cat. 3(Respiratory system irritation)<br/> Acute aquatic hazard : Cat. 1<br/> Chronic aquatic hazard : Cat. 1</p>                                                                                                                                       | Cat. IV  | <b>AOP Links: 36, 58, 59, 60, 61, 66, 107, 124, 153, 163, 175, 187, 200</b> | <a href="https://comptox.epa.gov/dashboard/dsstoxdb/results?search=DTXSID1026081#exec_sum">https://comptox.epa.gov/dashboard/dsstoxdb/results?search=DTXSID1026081#exec_sum</a> |
| DTXSID3040273 | Aluminum                        | 7429-90-5  | <p>Specific target organ toxic(Repeated exposure) : Cat. 2<br/> Chronic aquatic hazard : Cat. 1</p>                                                                                                                                                                                                       | Cat. IV  | No AOPs available                                                           | <a href="https://comptox.epa.gov/dashboard/dsstoxdb/results?search=DTXSID3040273#exec_sum">https://comptox.epa.gov/dashboard/dsstoxdb/results?search=DTXSID3040273#exec_sum</a> |
|               | Aluminum nitride                | 24304-00-5 | <p>Specific target organ toxic(Repeated exposure) : Cat. 2<br/> Acute aquatic hazard : Cat. 1</p>                                                                                                                                                                                                         | Cat. IV  | No AOPs available                                                           | <a href="https://comptox.epa.gov/dashboard/dsstoxdb/results?search=DTXSID8066977#exec_sum">https://comptox.epa.gov/dashboard/dsstoxdb/results?search=DTXSID8066977#exec_sum</a> |
| DTXSID3052484 | Bismuth                         | 7440-69-9  | <p>Specific target organ toxic(Single exposure) : Cat. 1</p>                                                                                                                                                                                                                                              | Cat. IV  | No AOPs available                                                           | <a href="https://comptox.epa.gov/dashboard/dsstoxdb/results?search=DTXSID3052484#exec_sum">https://comptox.epa.gov/dashboard/dsstoxdb/results?search=DTXSID3052484#exec_sum</a> |

|               |                                         |                          |                                                                                                                                                                                              |         |                       |                                                                                                                                                                                 |
|---------------|-----------------------------------------|--------------------------|----------------------------------------------------------------------------------------------------------------------------------------------------------------------------------------------|---------|-----------------------|---------------------------------------------------------------------------------------------------------------------------------------------------------------------------------|
| DTXSID3021982 | Butyl acetate                           | 123-86-4                 | Flammable liquid : Cat. 2<br>Specific target organ toxic(Single exposure) : Cat. 3(Respiratory system irritation)                                                                            | Cat. IV | <b>AOP Links: 124</b> | <a href="https://comptox.epa.gov/dashboard/dsstoxdb/results?search=DTXSID3021982#exec_sum">https://comptox.epa.gov/dashboard/dsstoxdb/results?search=DTXSID3021982#exec_sum</a> |
|               |                                         |                          | Specific target organ toxic(Single exposure) : Cat. 3(Anesthesia)                                                                                                                            |         |                       |                                                                                                                                                                                 |
| DTXSID3031022 | Chromium                                | 7440-47-3                | Respiratory sensitization : Cat. 1<br>Skin sensitization : Cat. 1<br>Specific target organ toxic(Single exposure) : Cat. 3(Respiratory system irritation)                                    | Cat. IV | No AOPs available     | <a href="https://comptox.epa.gov/dashboard/dsstoxdb/results?search=DTXSID3031022#exec_sum">https://comptox.epa.gov/dashboard/dsstoxdb/results?search=DTXSID3031022#exec_sum</a> |
|               | Cuprous selenide                        | 20405-64-5               | Specific target organ toxic(Repeated exposure) : Cat. 2<br>Acute aquatic hazard : Cat. 1<br>Chronic aquatic hazard : Cat. 1                                                                  | Cat. IV | No AOPs available     | <a href="https://comptox.epa.gov/dashboard/dsstoxdb/results?search=DTXSID6066606#exec_sum">https://comptox.epa.gov/dashboard/dsstoxdb/results?search=DTXSID6066606#exec_sum</a> |
|               | Ethyl-3-ethoxy propionate               | 763-69-9                 | Flammable liquid : Cat. 3<br>Specific target organ toxic(Single exposure) : Cat. 3(Anesthesia)                                                                                               | Cat. IV | No AOPs available     | <a href="https://comptox.epa.gov/dashboard/dsstoxdb/results?search=DTXSID0027309#exec_sum">https://comptox.epa.gov/dashboard/dsstoxdb/results?search=DTXSID0027309#exec_sum</a> |
| DTXSID9021928 | Ethylene glycol monoethyl ether acetate | 111-15-9                 | Flammable liquid : Cat. 3<br>Reproductive toxic : Cat. 1B<br>Specific target organ toxic(Single exposure) : Cat. 3(Anesthesia)                                                               | Cat. IV | <b>AOP Links: 60</b>  | <a href="https://comptox.epa.gov/dashboard/dsstoxdb/results?search=DTXSID9021928#exec_sum">https://comptox.epa.gov/dashboard/dsstoxdb/results?search=DTXSID9021928#exec_sum</a> |
| DTXSID6026379 | Ethyne                                  | 74-86-2                  | Flammable gas : Cat. 1<br>High pressure gas : dissolved gas<br>Specific target organ toxic(Single exposure) : Cat. 3(Anesthesia)                                                             | Cat. IV | No AOPs available     | <a href="https://comptox.epa.gov/dashboard/dsstoxdb/results?search=DTXSID6026379#exec_sum">https://comptox.epa.gov/dashboard/dsstoxdb/results?search=DTXSID6026379#exec_sum</a> |
| DTXSID8052485 | Indium                                  | 7440-74-6                | Flammable solid : Cat. 1<br>Specific target organ toxic(Single exposure) : Cat. 3(Respiratory system irritation)                                                                             | Cat. IV | No AOPs available     | <a href="https://comptox.epa.gov/dashboard/dsstoxdb/results?search=DTXSID8052485#exec_sum">https://comptox.epa.gov/dashboard/dsstoxdb/results?search=DTXSID8052485#exec_sum</a> |
|               | Mercuric telluride                      | 12068-90-5               | Reproductive toxic : Cat. 1B<br>Specific target organ toxic(Repeated exposure) : Cat. 2<br>Flammable liquid : Cat. 2                                                                         | Cat. IV | No AOPs available     | <a href="https://comptox.epa.gov/dashboard/dsstoxdb/results?search=DTXSID3065245#exec_sum">https://comptox.epa.gov/dashboard/dsstoxdb/results?search=DTXSID3065245#exec_sum</a> |
| DTXSID0021917 | n-Hexane                                | 110-54-3                 | Reproductive toxic : Cat. 2<br>Specific target organ toxic(Single exposure) : Cat. 3(Anesthesia)<br>Specific target organ toxic(Repeated exposure) : Cat. 2<br>Oxidizing gas : Cat. 1        | Cat. IV | No AOPs available     | <a href="https://comptox.epa.gov/dashboard/dsstoxdb/results?search=DTXSID0021917#exec_sum">https://comptox.epa.gov/dashboard/dsstoxdb/results?search=DTXSID0021917#exec_sum</a> |
| DTXSID8021066 | Nitrous oxide                           | 10024-97-2               | Compressed gas: liqified gas<br>Reproductive toxic : Cat. 1A<br>Specific target organ toxic(Single exposure) : Cat. 3(Anesthesia)<br>Specific target organ toxic(Repeated exposure) : Cat. 1 | Cat. IV | No AOPs available     | <a href="https://comptox.epa.gov/dashboard/dsstoxdb/results?search=DTXSID8021066#exec_sum">https://comptox.epa.gov/dashboard/dsstoxdb/results?search=DTXSID8021066#exec_sum</a> |
| DTXSID1029677 | Silica                                  | 7631-86-9<br>112926-00-8 | Specific target organ toxic(Repeated exposure) : Cat. 1                                                                                                                                      | Cat. IV | <b>AOP Links: 187</b> | <a href="https://comptox.epa.gov/dashboard/dsstoxdb/results?search=DTXSID1029677#exec_sum">https://comptox.epa.gov/dashboard/dsstoxdb/results?search=DTXSID1029677#exec_sum</a> |
| DTXSID4024305 | Silver                                  | 7440-22-4                | Specific target organ toxic(Single exposure) : Cat. 3(Respiratory system irritation)<br>Acute aquatic hazard : Cat. 1<br>Chronic aquatic hazard : Cat. 1                                     | Cat. IV | No AOPs available     | <a href="https://comptox.epa.gov/dashboard/dsstoxdb/results?search=DTXSID4024305#exec_sum">https://comptox.epa.gov/dashboard/dsstoxdb/results?search=DTXSID4024305#exec_sum</a> |

|               |                                                  |                          |                                                                                                                                                                                                            |         |                                        |                                                                                                                                                                                     |
|---------------|--------------------------------------------------|--------------------------|------------------------------------------------------------------------------------------------------------------------------------------------------------------------------------------------------------|---------|----------------------------------------|-------------------------------------------------------------------------------------------------------------------------------------------------------------------------------------|
|               | Stibine                                          | 7803-52-3                | Flammable gas : Cat. 1<br>Compressed gas: liquified gas<br>Specific target organ toxic(Single exposure) : Cat. 2                                                                                           | Cat. IV | No AOPs available                      | <a href="https://comptox.epa.gov/dashboard/dsstoxdb/results?search=DTXSID601014341#exec_sum">https://comptox.epa.gov/dashboard/dsstoxdb/results?search=DTXSID601014341#exec_sum</a> |
| DTXSID8029656 | Sulfur fluoride (SF6)                            | 2551-62-4                | Compressed gas: liquified gas<br>Specific target organ toxic(Single exposure) : Cat. 3(Respiratory system irritation)                                                                                      | Cat. IV | No AOPs available                      | <a href="https://comptox.epa.gov/dashboard/dsstoxdb/results?search=DTXSID8029656#exec_sum">https://comptox.epa.gov/dashboard/dsstoxdb/results?search=DTXSID8029656#exec_sum</a>     |
| DTXSID1049801 | Tin                                              | 7440-31-5                | Specific target organ toxic(Single exposure) : Cat. 3(Respiratory system irritation)<br>Specific target organ toxic(Repeated exposure) : Cat. 1                                                            | Cat. IV | No AOPs available                      | <a href="https://comptox.epa.gov/dashboard/dsstoxdb/results?search=DTXSID1049801#exec_sum">https://comptox.epa.gov/dashboard/dsstoxdb/results?search=DTXSID1049801#exec_sum</a>     |
|               | [3-(2,3-epoxypropoxy)propyl]diethoxymethylsilane | 2897-60-1                | Warning! According to the classification provided by companies to ECHA in REACH registrations this substance is harmful to aquatic life with long lasting effects and may cause an allergic skin reaction. | Cat. V  | No AOPs available                      | <a href="https://comptox.epa.gov/dashboard/dsstoxdb/results?search=DTXSID2044638#exec_sum">https://comptox.epa.gov/dashboard/dsstoxdb/results?search=DTXSID2044638#exec_sum</a>     |
|               | 2,4,6,8-Tetramethylcyclotetrasiloxane            | 2370-88-9                | Flammable liquid : Cat. 2<br>Acute aquatic hazard : Cat. 1<br>Chronic aquatic hazard : Cat. 1                                                                                                              | Cat. V  | No AOPs available                      | <a href="https://comptox.epa.gov/dashboard/dsstoxdb/results?search=DTXSID10870958#exec_sum">https://comptox.epa.gov/dashboard/dsstoxdb/results?search=DTXSID10870958#exec_sum</a>   |
|               | Cadmium selenide                                 | 1306-24-7<br>12400-33-8  | Acute aquatic hazard : Cat. 1<br>Chronic aquatic hazard : Cat. 1                                                                                                                                           | Cat. V  | No AOPs available                      | <a href="https://comptox.epa.gov/dashboard/dsstoxdb/results?search=DTXSID1061651#exec_sum">https://comptox.epa.gov/dashboard/dsstoxdb/results?search=DTXSID1061651#exec_sum</a>     |
|               | Copper(II) oxide                                 | 1317-38-0                | Acute aquatic hazard : Cat. 1<br>Chronic aquatic hazard : Cat. 1                                                                                                                                           | Cat. V  | No AOPs available                      | <a href="https://comptox.epa.gov/dashboard/dsstoxdb/results?search=DTXSID5034488#exec_sum">https://comptox.epa.gov/dashboard/dsstoxdb/results?search=DTXSID5034488#exec_sum</a>     |
|               | Cupric sulfide                                   | 1317-40-4                | Acute aquatic hazard : Cat. 1<br>Chronic aquatic hazard : Cat. 1                                                                                                                                           | Cat. V  | No AOPs available                      | <a href="https://comptox.epa.gov/dashboard/dsstoxdb/results?search=DTXSID0061666#exec_sum">https://comptox.epa.gov/dashboard/dsstoxdb/results?search=DTXSID0061666#exec_sum</a>     |
|               | Dibutyl ether                                    | 142-96-1                 | Flammable liquid : Cat. 3<br>Chronic aquatic hazard : Cat. 3<br>Flammable solid : Cat. 2                                                                                                                   | Cat. V  | No AOPs available                      | <a href="https://comptox.epa.gov/dashboard/dsstoxdb/results?search=DTXSID1022007#exec_sum">https://comptox.epa.gov/dashboard/dsstoxdb/results?search=DTXSID1022007#exec_sum</a>     |
|               | Germanium                                        | 7440-56-4                | Acute aquatic hazard : Cat. 1<br>Chronic aquatic hazard : Cat. 1                                                                                                                                           | Cat. V  | No AOPs available                      | <a href="https://comptox.epa.gov/dashboard/dsstoxdb/results?search=DTXSID8052483#exec_sum">https://comptox.epa.gov/dashboard/dsstoxdb/results?search=DTXSID8052483#exec_sum</a>     |
|               | Octafluoro cyclopentene                          | 559-40-0                 | Chronic aquatic hazard : Cat. 3                                                                                                                                                                            | Cat. V  | No AOPs available                      | <a href="https://comptox.epa.gov/dashboard/dsstoxdb/results?search=DTXSID7073193#exec_sum">https://comptox.epa.gov/dashboard/dsstoxdb/results?search=DTXSID7073193#exec_sum</a>     |
|               | Perfluorotributylamine                           | 311-89-7                 | Acute aquatic hazard : Cat. 1                                                                                                                                                                              | Cat. V  | No AOPs available                      | <a href="https://comptox.epa.gov/dashboard/dsstoxdb/results?search=DTXSID0027141#exec_sum">https://comptox.epa.gov/dashboard/dsstoxdb/results?search=DTXSID0027141#exec_sum</a>     |
| DTXSID9026423 | Tetramethylsilane                                | 75-76-3                  | Flammable liquid : Cat. 1<br>Chronic aquatic hazard : Cat. 2                                                                                                                                               | Cat. V  | No AOPs available                      | <a href="https://comptox.epa.gov/dashboard/dsstoxdb/results?search=DTXSID9026423#exec_sum">https://comptox.epa.gov/dashboard/dsstoxdb/results?search=DTXSID9026423#exec_sum</a>     |
|               | Thallium selenide                                | 12039-52-0<br>15572-25-5 | Acute aquatic hazard : Cat. 1<br>Chronic aquatic hazard : Cat. 1                                                                                                                                           | Cat. V  | No AOPs available<br>No AOPs available | <a href="https://comptox.epa.gov/dashboard/dsstoxdb/results?search=DTXSID6024335#exec_sum">https://comptox.epa.gov/dashboard/dsstoxdb/results?search=DTXSID6024335#exec_sum</a>     |
| DTXSID7035016 | Zinc oxide                                       | 1314-13-2                | Acute aquatic hazard : Cat. 1<br>Chronic aquatic hazard : Cat. 1                                                                                                                                           | Cat. V  | No AOPs available                      | <a href="https://comptox.epa.gov/dashboard/dsstoxdb/results?search=DTXSID7035016#exec_sum">https://comptox.epa.gov/dashboard/dsstoxdb/results?search=DTXSID7035016#exec_sum</a>     |
| DTXSID7024031 | (E)-1,2-Dichloroethylene                         | 156-60-5                 |                                                                                                                                                                                                            | Cat. VI | <b>AOP Links: 187</b>                  | <a href="https://comptox.epa.gov/dashboard/dsstoxdb/results?search=DTXSID7024031#exec_sum">https://comptox.epa.gov/dashboard/dsstoxdb/results?search=DTXSID7024031#exec_sum</a>     |
| DTXSID2024030 | (Z)-1,2-Dichloroethylene                         | 156-59-2                 |                                                                                                                                                                                                            | Cat. VI | No AOPs available                      | <a href="https://comptox.epa.gov/dashboard/dsstoxdb/results?search=DTXSID2024030#exec_sum">https://comptox.epa.gov/dashboard/dsstoxdb/results?search=DTXSID2024030#exec_sum</a>     |

|               |                                                                 |                         |                           |         |                            |                                                                                                                                                                                   |
|---------------|-----------------------------------------------------------------|-------------------------|---------------------------|---------|----------------------------|-----------------------------------------------------------------------------------------------------------------------------------------------------------------------------------|
| DTXSID8024284 | 1-Methoxy-2-propanol                                            | 107-98-2                | Flammable liquid : Cat. 3 | Cat. VI | <b>AOP Links: 200</b>      | <a href="https://comptox.epa.gov/dashboard/dsstoxdb/results?search=DTXSID8024284#exec_sum">https://comptox.epa.gov/dashboard/dsstoxdb/results?search=DTXSID8024284#exec_sum</a>   |
| DTXSID8021519 | 2-(2-Butoxyethoxy)ethanol                                       | 112-34-5                |                           | Cat. VI | <b>AOP Links: 153, 200</b> | <a href="https://comptox.epa.gov/dashboard/dsstoxdb/results?search=DTXSID8021519#exec_sum">https://comptox.epa.gov/dashboard/dsstoxdb/results?search=DTXSID8021519#exec_sum</a>   |
|               | 2-[2,5-di-tert-butyl-4-(oxiran-2-ylmethoxy)phenoxyethyl]oxirane | 64777-22-6              |                           | Cat. VI | No AOPs available          | <a href="https://comptox.epa.gov/dashboard/dsstoxdb/results?search=DTXSID40288784#exec_sum">https://comptox.epa.gov/dashboard/dsstoxdb/results?search=DTXSID40288784#exec_sum</a> |
|               | ACRYLIC RESINS (MONOMERS)                                       | 9003-01-4               | No data                   | Cat. VI | No AOPs available          | <a href="https://comptox.epa.gov/dashboard/dsstoxdb/results?search=DTXSID50873988#exec_sum">https://comptox.epa.gov/dashboard/dsstoxdb/results?search=DTXSID50873988#exec_sum</a> |
|               | Aluminum tris(8-hydroxyquinoline)                               | 2085-33-8               |                           | Cat. VI | No AOPs available          | -                                                                                                                                                                                 |
| DTXSID5023879 | Antimony                                                        | 7440-36-0               | No data                   | Cat. VI | No AOPs available          | <a href="https://comptox.epa.gov/dashboard/dsstoxdb/results?search=DTXSID5023879#exec_sum">https://comptox.epa.gov/dashboard/dsstoxdb/results?search=DTXSID5023879#exec_sum</a>   |
| DTXSID3052482 | Argon                                                           | 7440-37-1               | Compressed gas            | Cat. VI | No AOPs available          | <a href="https://comptox.epa.gov/dashboard/dsstoxdb/results?search=DTXSID3052482#exec_sum">https://comptox.epa.gov/dashboard/dsstoxdb/results?search=DTXSID3052482#exec_sum</a>   |
| DTXSID0020103 | Arsenic oxide (As2O3)                                           | 1327-53-3               |                           | Cat. VI | <b>AOP Links: 187, 200</b> | <a href="https://comptox.epa.gov/dashboard/dsstoxdb/results?search=DTXSID0020103#exec_sum">https://comptox.epa.gov/dashboard/dsstoxdb/results?search=DTXSID0020103#exec_sum</a>   |
|               | Bis(dimethylamino)dimethylsilane                                | 3768-58-9               |                           | Cat. VI | No AOPs available          | <a href="https://comptox.epa.gov/dashboard/dsstoxdb/results?search=DTXSID8063177#exec_sum">https://comptox.epa.gov/dashboard/dsstoxdb/results?search=DTXSID8063177#exec_sum</a>   |
|               | Bismuth telluride, undoped and Se-doped                         | 1304-82-1<br>37293-14-4 | No data                   | Cat. VI | No AOPs available          | <a href="https://comptox.epa.gov/dashboard/dsstoxdb/results?search=DTXSID90894839#exec_sum">https://comptox.epa.gov/dashboard/dsstoxdb/results?search=DTXSID90894839#exec_sum</a> |
| DTXSID7034387 | Boric oxide                                                     | 1303-86-2               |                           | Cat. VI | No AOPs available          | <a href="https://comptox.epa.gov/dashboard/dsstoxdb/results?search=DTXSID7034387#exec_sum">https://comptox.epa.gov/dashboard/dsstoxdb/results?search=DTXSID7034387#exec_sum</a>   |
| DTXSID5051498 | Boron nitride                                                   | 10043-11-5              | No data                   | Cat. VI | No AOPs available          | <a href="https://comptox.epa.gov/dashboard/dsstoxdb/results?search=DTXSID5051498#exec_sum">https://comptox.epa.gov/dashboard/dsstoxdb/results?search=DTXSID5051498#exec_sum</a>   |
| DTXSID2060044 | Boron, trifluoro(tetrahydrofuran)-, (T-4)-                      | 462-34-0                | No data                   | Cat. VI | No AOPs available          | <a href="https://comptox.epa.gov/dashboard/dsstoxdb/results?search=DTXSID2060044#exec_sum">https://comptox.epa.gov/dashboard/dsstoxdb/results?search=DTXSID2060044#exec_sum</a>   |
| DTXSID1022007 | Butyl ether                                                     | 142-96-1                |                           | Cat. VI | No AOPs available          | <a href="https://comptox.epa.gov/dashboard/dsstoxdb/results?search=DTXSID1022007#exec_sum">https://comptox.epa.gov/dashboard/dsstoxdb/results?search=DTXSID1022007#exec_sum</a>   |
|               | Cellulose                                                       | 9004-34-6               | No data                   | Cat. VI | No AOPs available          | <a href="https://comptox.epa.gov/dashboard/dsstoxdb/results?search=DTXSID3050492#exec_sum">https://comptox.epa.gov/dashboard/dsstoxdb/results?search=DTXSID3050492#exec_sum</a>   |

|                               |                                        |                         |         |         |                                        |                                                                                                                                                                                                                                                                                                                                                                                      |
|-------------------------------|----------------------------------------|-------------------------|---------|---------|----------------------------------------|--------------------------------------------------------------------------------------------------------------------------------------------------------------------------------------------------------------------------------------------------------------------------------------------------------------------------------------------------------------------------------------|
|                               | Cerium oxide                           | 1345-13-7               | No data | Cat. VI | No AOPs available                      | <a href="https://comptox.epa.gov/dashboard/dsstoxdb/results?search=DTXSID10904282#exec_summary">https://comptox.epa.gov/dashboard/dsstoxdb/results?search=DTXSID10904282#exec_summary</a>                                                                                                                                                                                            |
|                               | CHLOROFLUOROCARBONS                    | 11126-05-9              | No data | Cat. VI | No AOPs available                      | -                                                                                                                                                                                                                                                                                                                                                                                    |
| <a href="#">DTXSID4043721</a> | Chromium(III) oxide                    | 1308-38-9               | No data | Cat. VI | No AOPs available                      | <a href="https://comptox.epa.gov/dashboard/dsstoxdb/results?search=DTXSID4043721#exec_summary">https://comptox.epa.gov/dashboard/dsstoxdb/results?search=DTXSID4043721#exec_summary</a>                                                                                                                                                                                              |
| <a href="#">DTXSID5034488</a> | Cupric oxide                           | 1317-38-0               |         | Cat. VI | No AOPs available                      | <a href="https://comptox.epa.gov/dashboard/dsstoxdb/results?search=DTXSID5034488#exec_summary">https://comptox.epa.gov/dashboard/dsstoxdb/results?search=DTXSID5034488#exec_summary</a>                                                                                                                                                                                              |
| <a href="#">DTXSID9029691</a> | Diammonium peroxydisulfate             | 7727-54-0               |         | Cat. VI | No AOPs available                      | <a href="https://comptox.epa.gov/dashboard/dsstoxdb/results?search=DTXSID9029691#exec_summary">https://comptox.epa.gov/dashboard/dsstoxdb/results?search=DTXSID9029691#exec_summary</a>                                                                                                                                                                                              |
| <a href="#">DTXSID0020868</a> | Dichloromethane                        | 75-09-2                 |         | Cat. VI | No AOPs available                      | <a href="https://comptox.epa.gov/dashboard/dsstoxdb/results?search=DTXSID0020868#exec_summary">https://comptox.epa.gov/dashboard/dsstoxdb/results?search=DTXSID0020868#exec_summary</a>                                                                                                                                                                                              |
| <a href="#">DTXSID1052082</a> | Dichlorosilane                         | 4109-96-0               |         | Cat. VI | No AOPs available                      | <a href="https://comptox.epa.gov/dashboard/dsstoxdb/results?search=DTXSID1052082#exec_summary">https://comptox.epa.gov/dashboard/dsstoxdb/results?search=DTXSID1052082#exec_summary</a>                                                                                                                                                                                              |
|                               | Diethylsilane                          | 542-91-6                | No data | Cat. VI | No AOPs available                      | <a href="https://comptox.epa.gov/dashboard/dsstoxdb/results?search=DTXSID20870601#exec_summary">https://comptox.epa.gov/dashboard/dsstoxdb/results?search=DTXSID20870601#exec_summary</a>                                                                                                                                                                                            |
| <a href="#">DTXSID2021735</a> | Dimethyl sulfoxide                     | 67-68-5                 | No data | Cat. VI | <b>AOP Links: 150, 153</b>             | <a href="https://comptox.epa.gov/dashboard/dsstoxdb/results?search=DTXSID2021735#exec_summary">https://comptox.epa.gov/dashboard/dsstoxdb/results?search=DTXSID2021735#exec_summary</a>                                                                                                                                                                                              |
|                               | Dodecyl and tetradecyl glycidyl ethers | 2461-18-9<br>38954-75-5 | No data | Cat. VI | No AOPs available<br>No AOPs available | <a href="https://comptox.epa.gov/dashboard/dsstoxdb/results?search=DTXSID0025494#exec_summary">https://comptox.epa.gov/dashboard/dsstoxdb/results?search=DTXSID0025494#exec_summary</a><br><a href="https://comptox.epa.gov/dashboard/dsstoxdb/results?search=DTXSID60865935#exec_summary">https://comptox.epa.gov/dashboard/dsstoxdb/results?search=DTXSID60865935#exec_summary</a> |
| <a href="#">DTXSID0025494</a> | Dodecyl glycidyl ether                 | 2461-18-9               |         | Cat. VI | No AOPs available                      | <a href="https://comptox.epa.gov/dashboard/dsstoxdb/results?search=DTXSID0025494#exec_summary">https://comptox.epa.gov/dashboard/dsstoxdb/results?search=DTXSID0025494#exec_summary</a>                                                                                                                                                                                              |
|                               | EPOXY RESINS                           | 61788-97-4              | No data | Cat. VI | No AOPs available                      | <a href="https://comptox.epa.gov/dashboard/dsstoxdb/results?search=DTXSID0052887#exec_summary">https://comptox.epa.gov/dashboard/dsstoxdb/results?search=DTXSID0052887#exec_summary</a>                                                                                                                                                                                              |
| <a href="#">DTXSID0027309</a> | Ethyl 3-ethoxypropionate               | 763-69-9                |         | Cat. VI | No AOPs available                      | <a href="https://comptox.epa.gov/dashboard/dsstoxdb/results?search=DTXSID0027309#exec_summary">https://comptox.epa.gov/dashboard/dsstoxdb/results?search=DTXSID0027309#exec_summary</a>                                                                                                                                                                                              |
|                               | Ethyl silicate                         | 11099-06-2              | No data | Cat. VI | No AOPs available                      | <a href="https://comptox.epa.gov/dashboard/dsstoxdb/results?search=DTXSID4027731#exec_summary">https://comptox.epa.gov/dashboard/dsstoxdb/results?search=DTXSID4027731#exec_summary</a>                                                                                                                                                                                              |



|                                |                          |                          |                                                        |         |                                        |                                                                                                                                                                                                                                                                                                                                                                      |
|--------------------------------|--------------------------|--------------------------|--------------------------------------------------------|---------|----------------------------------------|----------------------------------------------------------------------------------------------------------------------------------------------------------------------------------------------------------------------------------------------------------------------------------------------------------------------------------------------------------------------|
| <a href="#">DTXSID1026378</a>  | Ethylene                 | 74-85-1                  | Flammable gas : Cat. 1<br>Compressed gas: liqified gas | Cat. VI | No AOPs available                      | <a href="https://comptox.epa.gov/dashboard/dsstoxdb/results?search=DTXSID1026378#exec_sum">https://comptox.epa.gov/dashboard/dsstoxdb/results?search=DTXSID1026378#exec_sum</a>                                                                                                                                                                                      |
|                                | Gallium                  | 7440-55-3                | Metal corrosive : Cat. 1                               | Cat. VI | No AOPs available                      | <a href="https://comptox.epa.gov/dashboard/dsstoxdb/results?search=DTXSID8064696#exec_sum">https://comptox.epa.gov/dashboard/dsstoxdb/results?search=DTXSID8064696#exec_sum</a>                                                                                                                                                                                      |
|                                | Gallium nitride          | 25617-97-4               | No data                                                | Cat. VI | No AOPs available                      | <a href="https://comptox.epa.gov/dashboard/dsstoxdb/results?search=DTXSID2067111#exec_sum">https://comptox.epa.gov/dashboard/dsstoxdb/results?search=DTXSID2067111#exec_sum</a>                                                                                                                                                                                      |
|                                | Gallium oxide            | 12024-21-4<br>12653-62-2 | No data                                                | Cat. VI | No AOPs available<br>No AOPs available | <a href="https://comptox.epa.gov/dashboard/dsstoxdb/results?search=DTXSID9031359#exec_sum">https://comptox.epa.gov/dashboard/dsstoxdb/results?search=DTXSID9031359#exec_sum</a><br><a href="https://comptox.epa.gov/dashboard/dsstoxdb/results?search=DTXSID60925583#exec_sum">https://comptox.epa.gov/dashboard/dsstoxdb/results?search=DTXSID60925583#exec_sum</a> |
|                                | Gallium phosphide        | 12063-98-8               | No data                                                | Cat. VI | No AOPs available                      | <a href="https://comptox.epa.gov/dashboard/dsstoxdb/results?search=DTXSID60894184#exec_sum">https://comptox.epa.gov/dashboard/dsstoxdb/results?search=DTXSID60894184#exec_sum</a>                                                                                                                                                                                    |
| <a href="#">DTXSID8031360</a>  | Gallium trichloride      | 13450-90-3               | Metal corrosive : Cat. 1                               | Cat. VI | No AOPs available                      | <a href="https://comptox.epa.gov/dashboard/dsstoxdb/results?search=DTXSID8031360#exec_sum">https://comptox.epa.gov/dashboard/dsstoxdb/results?search=DTXSID8031360#exec_sum</a>                                                                                                                                                                                      |
|                                | Germanium dioxide        | 1310-53-8                | No data                                                | Cat. VI | No AOPs available                      | <a href="https://comptox.epa.gov/dashboard/dsstoxdb/results?search=DTXSID0051653#exec_sum">https://comptox.epa.gov/dashboard/dsstoxdb/results?search=DTXSID0051653#exec_sum</a>                                                                                                                                                                                      |
|                                | Germanium telluride      | 12025-39-7<br>12260-55-8 | No data                                                | Cat. VI | No AOPs available                      | <a href="https://comptox.epa.gov/dashboard/dsstoxdb/results?search=DTXSID3065293#exec_sum">https://comptox.epa.gov/dashboard/dsstoxdb/results?search=DTXSID3065293#exec_sum</a>                                                                                                                                                                                      |
|                                | Glycerol                 | 56-81-5                  | No data                                                | Cat. VI | <b>AOP Links: 66, 200</b>              | <a href="https://comptox.epa.gov/dashboard/dsstoxdb/results?search=DTXSID9020663#exec_sum">https://comptox.epa.gov/dashboard/dsstoxdb/results?search=DTXSID9020663#exec_sum</a>                                                                                                                                                                                      |
| <a href="#">DTXSID3064697</a>  | Gold                     | 7440-57-5                | No data                                                | Cat. VI | No AOPs available                      | <a href="https://comptox.epa.gov/dashboard/dsstoxdb/results?search=DTXSID3064697#exec_sum">https://comptox.epa.gov/dashboard/dsstoxdb/results?search=DTXSID3064697#exec_sum</a>                                                                                                                                                                                      |
| <a href="#">DTXSID8064698</a>  | Hafnium                  | 7440-58-6                | Augoignition solid : Cat. 1                            | Cat. VI | No AOPs available                      | <a href="https://comptox.epa.gov/dashboard/dsstoxdb/results?search=DTXSID8064698#exec_sum">https://comptox.epa.gov/dashboard/dsstoxdb/results?search=DTXSID8064698#exec_sum</a>                                                                                                                                                                                      |
| <a href="#">DTXSID7036402</a>  | Helium                   | 7440-59-7<br>71086-78-7  | Compressed gas                                         | Cat. VI | No AOPs available                      | <a href="https://comptox.epa.gov/dashboard/dsstoxdb/results?search=DTXSID7036402#exec_sum">https://comptox.epa.gov/dashboard/dsstoxdb/results?search=DTXSID7036402#exec_sum</a>                                                                                                                                                                                      |
|                                | Hexachlorodisilane       | 13465-77-5               | Metal corrosive : Cat. 1                               | Cat. VI | No AOPs available                      | <a href="https://comptox.epa.gov/dashboard/dsstoxdb/results?search=DTXSID0065488#exec_sum">https://comptox.epa.gov/dashboard/dsstoxdb/results?search=DTXSID0065488#exec_sum</a>                                                                                                                                                                                      |
|                                | Hexafluoro-1,3-butadiene | 685-63-2                 | Flammable gas : Cat. 1<br>Compressed gas: liqified gas | Cat. VI | No AOPs available                      | <a href="https://comptox.epa.gov/dashboard/dsstoxdb/results?search=DTXSID4060991#exec_sum">https://comptox.epa.gov/dashboard/dsstoxdb/results?search=DTXSID4060991#exec_sum</a>                                                                                                                                                                                      |
| <a href="#">DTXSID9029851</a>  | Hydrated silica          | 112926-00-8              |                                                        | Cat. VI | No AOPs available                      | <a href="https://comptox.epa.gov/dashboard/dsstoxdb/results?search=DTXSID9029851#exec_sum">https://comptox.epa.gov/dashboard/dsstoxdb/results?search=DTXSID9029851#exec_sum</a>                                                                                                                                                                                      |
| <a href="#">DTXSID9029643</a>  | Hydrogen                 | 1333-74-0                | Flammable gas : Cat. 1<br>Compressed gas               | Cat. VI | No AOPs available                      | <a href="https://comptox.epa.gov/dashboard/dsstoxdb/results?search=DTXSID9029643#exec_sum">https://comptox.epa.gov/dashboard/dsstoxdb/results?search=DTXSID9029643#exec_sum</a>                                                                                                                                                                                      |
|                                | Indium arsenide          | 1303-11-3                | No data                                                | Cat. VI | <b>AOP Links: 60, 150, 200</b>         | <a href="https://comptox.epa.gov/dashboard/dsstoxdb/results?search=DTXSID5023825#exec_sum">https://comptox.epa.gov/dashboard/dsstoxdb/results?search=DTXSID5023825#exec_sum</a>                                                                                                                                                                                      |
|                                | Indium nitride           | 25617-98-5               | No data                                                | Cat. VI | No AOPs available                      | <a href="https://comptox.epa.gov/dashboard/dsstoxdb/results?search=DTXSID7067112#exec_sum">https://comptox.epa.gov/dashboard/dsstoxdb/results?search=DTXSID7067112#exec_sum</a>                                                                                                                                                                                      |
| <a href="#">DTXSID90893847</a> | Manganese sesquioxide    | 1317-34-6                | No data                                                | Cat. VI | No AOPs available                      | <a href="https://comptox.epa.gov/dashboard/dsstoxdb/results?search=DTXSID90893847#exec_sum">https://comptox.epa.gov/dashboard/dsstoxdb/results?search=DTXSID90893847#exec_sum</a>                                                                                                                                                                                    |

|                |                                     |            |                                          |         |                           |                                                                                                                                                                                     |
|----------------|-------------------------------------|------------|------------------------------------------|---------|---------------------------|-------------------------------------------------------------------------------------------------------------------------------------------------------------------------------------|
| DTXSID5042110  | Manganese(II) oxide                 | 1344-43-0  | No data                                  | Cat. VI | No AOPs available         | <a href="https://comptox.epa.gov/dashboard/dsstoxdb/results?search=DTXSID5042110#exec_sum">https://comptox.epa.gov/dashboard/dsstoxdb/results?search=DTXSID5042110#exec_sum</a>     |
| DTXSID6024200  | m-Cresol                            | 108-39-4   |                                          | Cat. VI | <b>AOP Links: 175</b>     | <a href="https://comptox.epa.gov/dashboard/dsstoxdb/results?search=DTXSID6024200#exec_sum">https://comptox.epa.gov/dashboard/dsstoxdb/results?search=DTXSID6024200#exec_sum</a>     |
| DTXSID6020802  | Melamine                            | 108-78-1   | No data                                  | Cat. VI | No AOPs available         | <a href="https://comptox.epa.gov/dashboard/dsstoxdb/results?search=DTXSID6020802#exec_sum">https://comptox.epa.gov/dashboard/dsstoxdb/results?search=DTXSID6020802#exec_sum</a>     |
|                | Mercury(II) selenide                | 20601-83-6 | No data                                  | Cat. VI | No AOPs available         | <a href="https://comptox.epa.gov/dashboard/dsstoxdb/results?search=DTXSID8066630#exec_sum">https://comptox.epa.gov/dashboard/dsstoxdb/results?search=DTXSID8066630#exec_sum</a>     |
| DTXSID8025545  | Methane                             | 74-82-8    | Flammable gas : Cat. 1<br>Compressed gas | Cat. VI | No AOPs available         | <a href="https://comptox.epa.gov/dashboard/dsstoxdb/results?search=DTXSID8025545#exec_sum">https://comptox.epa.gov/dashboard/dsstoxdb/results?search=DTXSID8025545#exec_sum</a>     |
| DTXSID6029597  | Methane, difluoro-                  | 75-10-5    |                                          | Cat. VI | No AOPs available         | <a href="https://comptox.epa.gov/dashboard/dsstoxdb/results?search=DTXSID6029597#exec_sum">https://comptox.epa.gov/dashboard/dsstoxdb/results?search=DTXSID6029597#exec_sum</a>     |
|                | Methyl-3-methoxy propionate         | 3852-09-3  | No data                                  | Cat. VI | <b>AOP Links: 200</b>     | <a href="https://comptox.epa.gov/dashboard/dsstoxdb/results?search=DTXSID3052060#exec_sum">https://comptox.epa.gov/dashboard/dsstoxdb/results?search=DTXSID3052060#exec_sum</a>     |
|                | Molybdenum disilicide               | 12136-78-6 | No data                                  | Cat. VI | No AOPs available         | <a href="https://comptox.epa.gov/dashboard/dsstoxdb/results?search=DTXSID601014284#exec_sum">https://comptox.epa.gov/dashboard/dsstoxdb/results?search=DTXSID601014284#exec_sum</a> |
| DTXSID5020499  | N,N-Dimethylacetamide               | 127-19-5   |                                          | Cat. VI | <b>AOP Links: 60, 200</b> | <a href="https://comptox.epa.gov/dashboard/dsstoxdb/results?search=DTXSID5020499#exec_sum">https://comptox.epa.gov/dashboard/dsstoxdb/results?search=DTXSID5020499#exec_sum</a>     |
| DTXSID6020515  | N,N-Dimethylformamide               | 68-12-2    |                                          | Cat. VI | <b>AOP Links: 58</b>      | <a href="https://comptox.epa.gov/dashboard/dsstoxdb/results?search=DTXSID6020515#exec_sum">https://comptox.epa.gov/dashboard/dsstoxdb/results?search=DTXSID6020515#exec_sum</a>     |
|                | NITRIDES                            | 18851-77-9 | No data                                  | Cat. VI | No AOPs available         | -                                                                                                                                                                                   |
| DTXSID8021808  | o-Cresol                            | 95-48-7    |                                          | Cat. VI | <b>AOP Links: 61</b>      | <a href="https://comptox.epa.gov/dashboard/dsstoxdb/results?search=DTXSID8021808#exec_sum">https://comptox.epa.gov/dashboard/dsstoxdb/results?search=DTXSID8021808#exec_sum</a>     |
| DTXSID60865935 | Oxirane, 2-[(tetradecyloxy)methyl]- | 38954-75-5 |                                          | Cat. VI | No AOPs available         | <a href="https://comptox.epa.gov/dashboard/dsstoxdb/results?search=DTXSID60865935#exec_sum">https://comptox.epa.gov/dashboard/dsstoxdb/results?search=DTXSID60865935#exec_sum</a>   |

|               |                                       |                          |                                                                                                                      |         |                                         |                                                                                                                                                                                                                                                                                                                                                                        |
|---------------|---------------------------------------|--------------------------|----------------------------------------------------------------------------------------------------------------------|---------|-----------------------------------------|------------------------------------------------------------------------------------------------------------------------------------------------------------------------------------------------------------------------------------------------------------------------------------------------------------------------------------------------------------------------|
| DTXSID7021869 | p-Cresol                              | 106-44-5                 |                                                                                                                      | Cat. VI | <b>AOP Links: 58</b>                    | <a href="https://comptox.epa.gov/dashboard/dsstoxdb/results?search=DTXSID7021869#exec_sum">https://comptox.epa.gov/dashboard/dsstoxdb/results?search=DTXSID7021869#exec_sum</a>                                                                                                                                                                                        |
|               | Perfluoro compounds, C5-18            | 86508-42-1               | No data                                                                                                              | Cat. VI | No AOPs available                       | <a href="https://comptox.epa.gov/dashboard/dsstoxdb/results?search=DTXSID5029059#exec_sum">https://comptox.epa.gov/dashboard/dsstoxdb/results?search=DTXSID5029059#exec_sum</a>                                                                                                                                                                                        |
| DTXSID2041915 | Perfluoroethane                       | 76-16-4                  | Compressed gas: liqified gas                                                                                         | Cat. VI | No AOPs available                       | <a href="https://comptox.epa.gov/dashboard/dsstoxdb/results?search=DTXSID2041915#exec_sum">https://comptox.epa.gov/dashboard/dsstoxdb/results?search=DTXSID2041915#exec_sum</a>                                                                                                                                                                                        |
| DTXSID9052503 | Perflutren                            | 76-19-7                  | Compressed gas: liqified gas                                                                                         | Cat. VI | No AOPs available                       | <a href="https://comptox.epa.gov/dashboard/dsstoxdb/results?search=DTXSID9052503#exec_sum">https://comptox.epa.gov/dashboard/dsstoxdb/results?search=DTXSID9052503#exec_sum</a>                                                                                                                                                                                        |
| DTXSID1024382 | Phosphorus                            | 7723-14-0                |                                                                                                                      | Cat. VI | No AOPs available                       | <a href="https://comptox.epa.gov/dashboard/dsstoxdb/results?search=DTXSID1024382#exec_sum">https://comptox.epa.gov/dashboard/dsstoxdb/results?search=DTXSID1024382#exec_sum</a>                                                                                                                                                                                        |
| DTXSID4047597 | Poloxalene                            | 9003-11-6                | No data                                                                                                              | Cat. VI | <b>AOP Links: 60, 187</b>               | <a href="https://comptox.epa.gov/dashboard/dsstoxdb/results?search=DTXSID4047597#exec_sum">https://comptox.epa.gov/dashboard/dsstoxdb/results?search=DTXSID4047597#exec_sum</a>                                                                                                                                                                                        |
|               | Propylene glycol dimethylether        | 111109-77-4              | No data                                                                                                              | Cat. VI | No AOPs available                       | <a href="https://comptox.epa.gov/dashboard/dsstoxdb/results?search=DTXSID0042327#exec_sum">https://comptox.epa.gov/dashboard/dsstoxdb/results?search=DTXSID0042327#exec_sum</a>                                                                                                                                                                                        |
|               | p-tert-Butylphenol formaldehyde resin | 25085-50-1               | No data                                                                                                              | Cat. VI | No AOPs available                       | <a href="https://comptox.epa.gov/dashboard/dsstoxdb/results?search=DTXSID7047805#exec_sum">https://comptox.epa.gov/dashboard/dsstoxdb/results?search=DTXSID7047805#exec_sum</a>                                                                                                                                                                                        |
|               | Pyrene                                | 129-00-0                 | According to the notifications provided by companies to ECHA in REACH registrations no hazards have been classified. | Cat. VI | <b>AOP Links: 60, 66, 107, 150, 187</b> | <a href="https://comptox.epa.gov/dashboard/dsstoxdb/results?search=DTXSID3024289#exec_sum">https://comptox.epa.gov/dashboard/dsstoxdb/results?search=DTXSID3024289#exec_sum</a>                                                                                                                                                                                        |
| DTXSID3032040 | Quartz-alpha (SiO2)                   | 14808-60-7               |                                                                                                                      | Cat. VI | No AOPs available                       | <a href="https://comptox.epa.gov/dashboard/dsstoxdb/results?search=DTXSID3032040#exec_sum">https://comptox.epa.gov/dashboard/dsstoxdb/results?search=DTXSID3032040#exec_sum</a>                                                                                                                                                                                        |
|               | Rhenium                               | 7440-15-5                | No data                                                                                                              | Cat. VI | No AOPs available                       | <a href="https://comptox.epa.gov/dashboard/dsstoxdb/results?search=DTXSID9064685#exec_sum">https://comptox.epa.gov/dashboard/dsstoxdb/results?search=DTXSID9064685#exec_sum</a>                                                                                                                                                                                        |
| DTXSID7027702 | Rosin                                 | 8050-09-7                |                                                                                                                      | Cat. VI | No AOPs available                       | <a href="https://comptox.epa.gov/dashboard/dsstoxdb/results?search=DTXSID7027702#exec_sum">https://comptox.epa.gov/dashboard/dsstoxdb/results?search=DTXSID7027702#exec_sum</a>                                                                                                                                                                                        |
|               | Scandium                              | 7440-20-2                | Flammable solid : Cat. 1                                                                                             | Cat. VI | No AOPs available                       | <a href="https://comptox.epa.gov/dashboard/dsstoxdb/results?search=DTXSID9064689#exec_sum">https://comptox.epa.gov/dashboard/dsstoxdb/results?search=DTXSID9064689#exec_sum</a>                                                                                                                                                                                        |
|               | Scandium nitride                      | 25764-12-9               | No data                                                                                                              | Cat. VI | No AOPs available                       | <a href="https://comptox.epa.gov/dashboard/dsstoxdb/results?search=DTXSID9067142#exec_sum">https://comptox.epa.gov/dashboard/dsstoxdb/results?search=DTXSID9067142#exec_sum</a>                                                                                                                                                                                        |
|               | Selenourea                            | 630-10-4                 | No data                                                                                                              | Cat. VI | No AOPs available                       | <a href="https://comptox.epa.gov/dashboard/dsstoxdb/results?search=DTXSID4024303#exec_sum">https://comptox.epa.gov/dashboard/dsstoxdb/results?search=DTXSID4024303#exec_sum</a>                                                                                                                                                                                        |
| DTXSID1061071 | Silane, ethenyltrimethyl-             | 754-05-2                 | No data                                                                                                              | Cat. VI | No AOPs available                       | <a href="https://comptox.epa.gov/dashboard/dsstoxdb/results?search=DTXSID1061071#exec_sum">https://comptox.epa.gov/dashboard/dsstoxdb/results?search=DTXSID1061071#exec_sum</a>                                                                                                                                                                                        |
| DTXSID0051441 | Silicon                               | 7440-21-3<br>12597-37-4  | Flammable solid : Cat. 2                                                                                             | Cat. VI | No AOPs available                       | <a href="https://comptox.epa.gov/dashboard/dsstoxdb/results?search=DTXSID0051441#exec_sum">https://comptox.epa.gov/dashboard/dsstoxdb/results?search=DTXSID0051441#exec_sum</a>                                                                                                                                                                                        |
|               | Silicon nitride                       | 12033-60-2<br>12033-89-5 | No data                                                                                                              | Cat. VI | No AOPs available<br>No AOPs available  | <a href="https://comptox.epa.gov/dashboard/dsstoxdb/results?search=DTXSID50893181#exec_sum">https://comptox.epa.gov/dashboard/dsstoxdb/results?search=DTXSID50893181#exec_sum</a><br><a href="https://comptox.epa.gov/dashboard/dsstoxdb/results?search=DTXSID20892247#exec_sum">https://comptox.epa.gov/dashboard/dsstoxdb/results?search=DTXSID20892247#exec_sum</a> |
|               | Strontium titanate                    | 12060-59-2               | No data                                                                                                              | Cat. VI | No AOPs available                       | <a href="https://comptox.epa.gov/dashboard/dsstoxdb/results?search=DTXSID70893688#exec_sum">https://comptox.epa.gov/dashboard/dsstoxdb/results?search=DTXSID70893688#exec_sum</a>                                                                                                                                                                                      |
|               | tert-Butylarsine                      | 4262-43-5                | No data                                                                                                              | Cat. VI | No AOPs available                       | -                                                                                                                                                                                                                                                                                                                                                                      |
|               | Tetrafluoroboric acid                 | 14874-70-5               | No data                                                                                                              | Cat. VI | No AOPs available                       | <a href="https://comptox.epa.gov/dashboard/dsstoxdb/results?search=DTXSID4043773#exec_sum">https://comptox.epa.gov/dashboard/dsstoxdb/results?search=DTXSID4043773#exec_sum</a>                                                                                                                                                                                        |

|               |                                  |                          |                                                                                  |         |                                        |                                                                                                                                                                                                                                                                                                                                                                        |
|---------------|----------------------------------|--------------------------|----------------------------------------------------------------------------------|---------|----------------------------------------|------------------------------------------------------------------------------------------------------------------------------------------------------------------------------------------------------------------------------------------------------------------------------------------------------------------------------------------------------------------------|
|               | Tetrakis(dimethylamino) titanium | 3275-24-9                | No data                                                                          | Cat. VI | No AOPs available                      | <a href="https://comptox.epa.gov/dashboard/dsstoxdb/results?search=DTXSID3062946#exec_sum">https://comptox.epa.gov/dashboard/dsstoxdb/results?search=DTXSID3062946#exec_sum</a>                                                                                                                                                                                        |
| DTXSID8042474 | Tin dioxide                      | 18282-10-5               | No data                                                                          | Cat. VI | No AOPs available                      | <a href="https://comptox.epa.gov/dashboard/dsstoxdb/results?search=DTXSID8042474#exec_sum">https://comptox.epa.gov/dashboard/dsstoxdb/results?search=DTXSID8042474#exec_sum</a>                                                                                                                                                                                        |
|               | Titanium nitride                 | 11116-16-8<br>25583-20-4 | No data                                                                          | Cat. VI | No AOPs available                      | <a href="https://comptox.epa.gov/dashboard/dsstoxdb/results?search=DTXSID8067109#exec_sum">https://comptox.epa.gov/dashboard/dsstoxdb/results?search=DTXSID8067109#exec_sum</a>                                                                                                                                                                                        |
| DTXSID2041674 | Triethyl borate                  | 150-46-9                 | Flammable liquid : Cat. 2                                                        | Cat. VI | No AOPs available                      | <a href="https://comptox.epa.gov/dashboard/dsstoxdb/results?search=DTXSID2041674#exec_sum">https://comptox.epa.gov/dashboard/dsstoxdb/results?search=DTXSID2041674#exec_sum</a>                                                                                                                                                                                        |
|               | Triethylindium                   | 923-34-2                 | No data                                                                          | Cat. VI | No AOPs available                      | <a href="https://comptox.epa.gov/dashboard/dsstoxdb/results?search=DTXSID1061281#exec_sum">https://comptox.epa.gov/dashboard/dsstoxdb/results?search=DTXSID1061281#exec_sum</a>                                                                                                                                                                                        |
| DTXSID0026410 | Trifluoromethane                 | 75-46-7                  | Compressed gas: liqified gas                                                     | Cat. VI | No AOPs available                      | <a href="https://comptox.epa.gov/dashboard/dsstoxdb/results?search=DTXSID0026410#exec_sum">https://comptox.epa.gov/dashboard/dsstoxdb/results?search=DTXSID0026410#exec_sum</a>                                                                                                                                                                                        |
|               | Trimethylborane                  | 593-90-8                 | No data                                                                          | Cat. VI | No AOPs available                      | <a href="https://comptox.epa.gov/dashboard/dsstoxdb/results?search=DTXSID90208038#exec_sum">https://comptox.epa.gov/dashboard/dsstoxdb/results?search=DTXSID90208038#exec_sum</a>                                                                                                                                                                                      |
|               | Trimethylgallium                 | 1445-79-0                | Augoignition liquid : Cat. 1<br>Self-heating substances and mixtures :<br>Cat. 1 | Cat. VI | No AOPs available                      | <a href="https://comptox.epa.gov/dashboard/dsstoxdb/results?search=DTXSID2061696#exec_sum">https://comptox.epa.gov/dashboard/dsstoxdb/results?search=DTXSID2061696#exec_sum</a>                                                                                                                                                                                        |
|               | Trimethylindium                  | 3385-78-2                | No data                                                                          | Cat. VI | No AOPs available                      | <a href="https://comptox.epa.gov/dashboard/dsstoxdb/results?search=DTXSID90187490#exec_sum">https://comptox.epa.gov/dashboard/dsstoxdb/results?search=DTXSID90187490#exec_sum</a>                                                                                                                                                                                      |
| DTXSID8052481 | Tungsten                         | 7440-33-7                | Flammable solid : Cat. 1                                                         | Cat. VI | No AOPs available                      | <a href="https://comptox.epa.gov/dashboard/dsstoxdb/results?search=DTXSID8052481#exec_sum">https://comptox.epa.gov/dashboard/dsstoxdb/results?search=DTXSID8052481#exec_sum</a>                                                                                                                                                                                        |
|               | Zinc telluride                   | 1315-11-3                | No data                                                                          | Cat. VI | No AOPs available                      | <a href="https://comptox.epa.gov/dashboard/dsstoxdb/results?search=DTXSID0061664#exec_sum">https://comptox.epa.gov/dashboard/dsstoxdb/results?search=DTXSID0061664#exec_sum</a>                                                                                                                                                                                        |
|               | Zirconium boride                 | 12045-64-6<br>12046-91-2 | No data                                                                          | Cat. VI | No AOPs available<br>No AOPs available | <a href="https://comptox.epa.gov/dashboard/dsstoxdb/results?search=DTXSID5065223#exec_sum">https://comptox.epa.gov/dashboard/dsstoxdb/results?search=DTXSID5065223#exec_sum</a><br><a href="https://comptox.epa.gov/dashboard/dsstoxdb/results?search=DTXSID201014268#exec_sum">https://comptox.epa.gov/dashboard/dsstoxdb/results?search=DTXSID201014268#exec_sum</a> |
