# Supplementary material
Source: PubMed Central journal article supplement (PMC8097676)
Supplement: 13273_2021_139_MOESM5_ESM.pdf [file 13273_2021_139_MOESM5_ESM.pdf]

**Table S5. The proposed Chemicals for Additional AOP-based Hazard Evaluations in semiconductor manufacturing.**

| No. | Chemicals                       | CAS No.   | In Process                                                                     | MIEs                               | KEs                                                  | AOs                     | GHS category                                                                                                                                                                                                                                        | OSH Act                                                                                                                                                                                                                                                                                     | Chemicals control Act | ACT ON THE SAFETY CONTROL OF HAZARDOUS SUBSTANCES      | WASTES CONTROL ACT |
|-----|---------------------------------|-----------|--------------------------------------------------------------------------------|------------------------------------|------------------------------------------------------|-------------------------|-----------------------------------------------------------------------------------------------------------------------------------------------------------------------------------------------------------------------------------------------------|---------------------------------------------------------------------------------------------------------------------------------------------------------------------------------------------------------------------------------------------------------------------------------------------|-----------------------|--------------------------------------------------------|--------------------|
| 1   | 1-Methoxy-2-propanol            | 107-98-2  | Wafer processing, Photo (PR solvent)                                           | 1181 Activation, Estrogen receptor | 1182 Increase, Cell Proliferation (Epithelial Cells) | 1193 N/A, Breast Cancer | Flammable liquid Cat. 3                                                                                                                                                                                                                             | For Process safety management (PSM) Chemicals for exposure limits                                                                                                                                                                                                                           | N/A                   | Class 4 the second petroleum (Water-soluble) (2,000 L) | Designated waste   |
| 2   | 1-nitronaphthalene              | 86-57-7   | Intermediate for manufacturing branched light emitting agents for OLED devices | 1181 Activation, Estrogen receptor | 1182 Increase, Cell Proliferation (Epithelial Cells) | 1193 N/A, Breast Cancer | Flammable solid Cat. 2<br>Acute toxic (Oral) Cat. 3<br>Chronic aquatic toxicity Cat. 2                                                                                                                                                              | N/A                                                                                                                                                                                                                                                                                         | Toxic                 | N/A                                                    | N/A                |
| 3   | 2,2',6,6'-Tetrabromobisphenol A | 79-94-7   | Semiconductor and other electronic component manufacturing                     | 1181 Activation, Estrogen receptor | 1182 Increase, Cell Proliferation (Epithelial Cells) | 1193 N/A, Breast Cancer | Reproductive toxicity Cat. 1B<br>Acute aquatic toxicity Cat. 1<br>Chronic aquatic toxicity Cat. 1                                                                                                                                                   | N/A                                                                                                                                                                                                                                                                                         | Toxic                 | N/A                                                    | N/A                |
| 4   | 2-Butoxyethanol                 | 111-76-2  | Overall Chip assembly                                                          | 1181 Activation, Estrogen receptor | 1182 Increase, Cell Proliferation (Epithelial Cells) | 1193 N/A, Breast Cancer | Acute toxic (Oral) Cat. 4<br>Acute toxic (Inhalation: Vapor) Cat. 3<br>Skin corrosion/irritation Cat. 2<br>Serious eye damage/eye irritation Cat. 2<br>Carcinogenicity Cat. 2                                                                       | Chemicals for working environment measurement (Each 6 months)<br>Chemicals for management<br>Chemicals for special health exam. (Each 12 months)<br>Chemicals for exposure limits<br>Chemicals for working environment measurement. (Each 6 months)                                         | N/A                   | Class 4 the second petroleum (Water-soluble) (2,000 L) | Designated waste   |
| 5   | 2-Methoxyethanol                | 109-86-4  | Manufacture wafers for semiconductor manufacturing                             | 1181 Activation, Estrogen receptor | 1182 Increase, Cell Proliferation (Epithelial Cells) | 1193 N/A, Breast Cancer | Flammable liquid Cat. 3<br>Acute toxic (Oral) Cat. 4<br>Acute toxic (dermal) Cat. 4<br>Acute toxic (inhalation: gas) Cat. 4<br>Reproductive toxicity Cat. 1B<br>Specific target organ toxicity (Repeated exposure Cat. 2)                           | Chemicals for management<br>Chemicals for special health exam. (Each 12 months)<br>Chemicals for special management<br>For Process safety management (PSM)<br>Chemicals for exposure limits                                                                                                 | Toxic                 | Class 4 the second petroleum (Water-soluble) (2,000 L) | Designated waste   |
| 6   | 4-Chloro-2-methylphenol         | 1570-64-5 | Semiconductor Manufacturing                                                    | 1181 Activation, Estrogen receptor | 1182 Increase, Cell Proliferation (Epithelial Cells) | 1193 N/A, Breast Cancer | Acute toxic (inhalation: dust/mist) Cat. 3<br>Skin corrosion/irritation Cat. 1<br>Germ cell mutagenicity Cat. 1B<br>Acute aquatic toxicity Cat. 1<br>Chronic aquatic toxicity Cat. 1                                                                | N/A                                                                                                                                                                                                                                                                                         | N/A                   | N/A                                                    | Designated waste   |
| 7   | 9-Bromoanthracene               | 1564-64-3 | Intermediate for manufacturing OLED emitters                                   | 1181 Activation, Estrogen receptor | 1182 Increase, Cell Proliferation (Epithelial Cells) | 1193 N/A, Breast Cancer | No data                                                                                                                                                                                                                                             | N/A                                                                                                                                                                                                                                                                                         | N/A                   | N/A                                                    | N/A                |
| 8   | Acetaldehyde                    | 75-07-0   | Mold, Chip assembly                                                            | 1181 Activation, Estrogen receptor | 1182 Increase, Cell Proliferation (Epithelial Cells) | 1193 N/A, Breast Cancer | Flammable liquid Cat. 1<br>Acute toxic (Oral) Cat. 4<br>Serious eye damage/eye irritation Cat. 2<br>Germ cell mutagenicity Cat. 2<br>Carcinogenicity Cat. 1B<br>Specific target organ toxicity (Single exposure) Cat. 3<br>(Respiratory irritation) | Chemicals for working environment measurement. (Each 6 months)<br>Chemicals for management<br>Chemicals for special health exam. (Each 12 months)<br>For Process safety management (PSM)<br>Chemicals for exposure limits<br>Chemicals for working environment measurement. (Each 6 months) | N/A                   | Class 4 Special flammable (50 L)                       | Designated waste   |
| 9   | Acetonitrile                    | 75-05-8   | Semiconductor Electrodes                                                       | 1181 Activation, Estrogen receptor | 1182 Increase, Cell Proliferation (Epithelial Cells) | 1193 N/A, Breast Cancer | Flammable liquid Cat. 2<br>Acute toxic (Oral) Cat. 4<br>Serious eye damage/eye irritation Cat. 2<br>Specific target organ toxicity (Single exposure) Cat. 3<br>(Respiratory irritation)                                                             | Chemicals for working environment measurement. (Each 6 months)<br>Chemicals for management<br>Chemicals for special health                                                                                                                                                                  | N/A                   | Class 4 the first petroleum (Water-soluble) (400 L)    | N/A                |

|    |                                   |            |                                                                            |                                    |                                                      |                         |                                                                                                                                                                                                                                                                                                                                                                                                                                                                                                              |                                                                                                                                                                                                                                                                                                                                                                                                                                                                                                                                                                                                                     |       |                                                        |                  |
|----|-----------------------------------|------------|----------------------------------------------------------------------------|------------------------------------|------------------------------------------------------|-------------------------|--------------------------------------------------------------------------------------------------------------------------------------------------------------------------------------------------------------------------------------------------------------------------------------------------------------------------------------------------------------------------------------------------------------------------------------------------------------------------------------------------------------|---------------------------------------------------------------------------------------------------------------------------------------------------------------------------------------------------------------------------------------------------------------------------------------------------------------------------------------------------------------------------------------------------------------------------------------------------------------------------------------------------------------------------------------------------------------------------------------------------------------------|-------|--------------------------------------------------------|------------------|
| 10 | Antimony trichloride              | 10025-91-9 | Semiconductor Manufacturing                                                | 1181 Activation, Estrogen receptor | 1182 Increase, Cell Proliferation (Epithelial Cells) | 1193 N/A, Breast Cancer | Corrosive to metal Cat. 1<br>Acute toxic (Oral) Cat. 4<br>Serious eye damage/eye irritation Cat. 2<br>Chronic aquatic toxicity Cat. 2                                                                                                                                                                                                                                                                                                                                                                        | exam. (Each 12 months)<br>For Process safety management (PSM)<br>Chemicals for exposure limits<br>Chemicals for working environment measurement<br>Chemicals for working environment measurement. (Each 6 months)<br>Chemicals for management<br>Chemicals for special health exam.<br>Chemicals for special health exam. (Each 12 months)<br>Chemicals for exposure limits<br>Chemicals for permission<br>Chemicals for working environment measurement.<br>Chemicals for working environment measurement. (Each 6 months)<br>Chemicals for special health exam. (Each 12 months)<br>Chemicals for exposure limits | Toxic | N/A                                                    | Designated waste |
| 11 | Arsenic trioxide                  | 1327-53-3  | Semiconductor Manufacturing                                                | 1181 Activation, Estrogen receptor | 1182 Increase, Cell Proliferation (Epithelial Cells) | 1193 N/A, Breast Cancer | Acute toxic (Oral) Cat. 2<br>Serious eye damage/eye irritation Cat. 1<br>Carcinogenicity Cat. 1A<br>Specific target organ toxicity (Single exposure) Cat. 3 (Respiratory irritation)<br>Acute aquatic toxicity Cat. 1<br>Chronic aquatic toxicity Cat. 1                                                                                                                                                                                                                                                     | measurement. (Each 6 months)<br>Chemicals for special health exam.<br>Chemicals for special health exam. (Each 12 months)<br>Chemicals for exposure limits<br>Chemicals for permission<br>Chemicals for working environment measurement.<br>Chemicals for working environment measurement. (Each 6 months)<br>Chemicals for special health exam. (Each 12 months)<br>Chemicals for exposure limits                                                                                                                                                                                                                  | Toxic | N/A                                                    | Designated waste |
| 12 | Bisphenol A                       | 80-05-7    | Packaging                                                                  | 1181 Activation, Estrogen receptor | 1182 Increase, Cell Proliferation (Epithelial Cells) | 1193 N/A, Breast Cancer | Serious eye damage/eye irritation Cat. 1<br>Skin sensitization Cat. 1<br>Reproductive toxicity Cat. 1B<br>Specific target organ toxicity (Single exposure) Cat. 3 (Respiratory irritation)<br>Chronic aquatic toxicity Cat. 1<br>Acute toxic (Oral) Cat. 3<br>Acute toxic (dermal) Cat. 3<br>Skin corrosion/irritation Cat. 2                                                                                                                                                                                | N/A                                                                                                                                                                                                                                                                                                                                                                                                                                                                                                                                                                                                                 | Toxic | N/A                                                    | N/A              |
| 13 | Catechol                          | 120-80-9   | Wafer processing, Photo (PR removal)                                       | 1181 Activation, Estrogen receptor | 1182 Increase, Cell Proliferation (Epithelial Cells) | 1193 N/A, Breast Cancer | Serious eye damage/eye irritation Cat. 1<br>Germ cell mutagenicity Cat. 2<br>Carcinogenicity Cat. 2<br>Flammable liquid Cat. 3<br>Carcinogenicity Cat. 2<br>Specific target organ toxicity (Single exposure) Cat. 3 (Respiratory irritation)<br>Aspiration hazard Cat. 1<br>Chronic aquatic toxicity Cat. 2<br>Acute toxic (Oral) Cat. 4<br>Skin corrosion /irritation Cat. 2                                                                                                                                | Chemicals for exposure limits                                                                                                                                                                                                                                                                                                                                                                                                                                                                                                                                                                                       | N/A   | N/A                                                    | Designated waste |
| 14 | Cumene                            | 98-82-8    | Substitute for benzene in direct photocatalytic hydroxylation (of benzene) | 1181 Activation, Estrogen receptor | 1182 Increase, Cell Proliferation (Epithelial Cells) | 1193 N/A, Breast Cancer | Specific target organ toxicity (Single exposure) Cat. 3 (Respiratory irritation)<br>Aspiration hazard Cat. 1<br>Chronic aquatic toxicity Cat. 2<br>Acute toxic (Oral) Cat. 4<br>Skin corrosion /irritation Cat. 2<br>Serious eye damage/eye irritation Cat. 2<br>Carcinogenicity Cat. 2<br>Specific target organ toxicity (Single exposure) Cat. 3 (Respiratory irritation)<br>Aspiration hazard Cat. 1<br>Chronic aquatic toxicity Cat. 2<br>Acute toxic (Oral) Cat. 4<br>Skin corrosion /irritation Cat. 2 | For Process safety management (PSM)<br>Chemicals for exposure limits                                                                                                                                                                                                                                                                                                                                                                                                                                                                                                                                                | N/A   | Class 4 the second petroleum (Insoluble) (1,000 L)     | Designated waste |
| 15 | Diethanolamine                    | 111-42-2   | Used to remove unnecessary photoresist layers after turning and developing | 1181 Activation, Estrogen receptor | 1182 Increase, Cell Proliferation (Epithelial Cells) | 1193 N/A, Breast Cancer | Specific target organ toxicity (Single exposure) Cat. 3 (Respiratory irritation)<br>Specific target organ toxicity (Repeated exposure) Cat. 2<br>Chronic aquatic toxicity Cat. 3                                                                                                                                                                                                                                                                                                                             | Chemicals for working environment measurement. (Each 6 months)<br>Chemicals for management<br>Chemicals for exposure limits                                                                                                                                                                                                                                                                                                                                                                                                                                                                                         | N/A   | Class 4 the third petroleum (Water-soluble) (4,000 L)  | Designated waste |
| 16 | Diethylene glycol monobutyl ether | 112-34-5   | Semiconductor Manufacturing                                                | 1181 Activation, Estrogen receptor | 1182 Increase, Cell Proliferation (Epithelial Cells) | 1193 N/A, Breast Cancer | Serious eye damage/eye irritation Cat. 2                                                                                                                                                                                                                                                                                                                                                                                                                                                                     | Chemicals for exposure limits                                                                                                                                                                                                                                                                                                                                                                                                                                                                                                                                                                                       | N/A   | Class 4 the third petroleum (Water-soluble) (4,000 L)  | N/A              |
| 17 | Dimethyl acetamide                | 127-19-5   | Photo(diluent)                                                             | 1181 Activation, Estrogen receptor | 1182 Increase, Cell Proliferation (Epithelial Cells) | 1193 N/A, Breast Cancer | Acute toxic (dermal) Cat. 4<br>Acute toxic (inhalation: Vapor) Cat. 3<br>Serious eye damage/eye irritation Cat. 2<br>Carcinogenicity Cat. 2                                                                                                                                                                                                                                                                                                                                                                  | Chemicals for working environment measurement. (Each 6 months)<br>Chemicals for                                                                                                                                                                                                                                                                                                                                                                                                                                                                                                                                     | Toxic | Class 4 the second petroleum (Water-soluble) (2,000 L) | N/A              |

|    |                      |           |                                                                                                                                               |                                       |                                                      |                         |                                                                                                                                                                                                                                                                                                                                                                                                                                                                                  |                                                                                                                                                                                                                                                                                                                                                                                                                                                                                                   |                                       |                                                        |                  |   |
|----|----------------------|-----------|-----------------------------------------------------------------------------------------------------------------------------------------------|---------------------------------------|------------------------------------------------------|-------------------------|----------------------------------------------------------------------------------------------------------------------------------------------------------------------------------------------------------------------------------------------------------------------------------------------------------------------------------------------------------------------------------------------------------------------------------------------------------------------------------|---------------------------------------------------------------------------------------------------------------------------------------------------------------------------------------------------------------------------------------------------------------------------------------------------------------------------------------------------------------------------------------------------------------------------------------------------------------------------------------------------|---------------------------------------|--------------------------------------------------------|------------------|---|
| 18 | Ethyl acetate        | 141-78-6  | Chip assembly, Chip adhesion, mold, Solder ball attachment, etc.                                                                              | 1181<br>Activation, Estrogen receptor | 1182 Increase, Cell Proliferation (Epithelial Cells) | 1193 N/A, Breast Cancer | Reproductive toxicity Cat. 1B<br><br>Flammable liquid Cat. 2<br>Serious eye damage/eye irritation Cat. 2<br>Specific target organ toxicity (Single exposure) Cat. 3 (Narcotic effect)<br>Specific target organ toxicity (Single exposure) Cat. 3 (Respiratory irritation)                                                                                                                                                                                                        | management<br>Chemicals for special health exam. (Each 6 months)<br>Chemicals for special management<br>Chemicals for exposure limits<br>Chemicals for working environment measurement. (Each 6 months)<br>Chemicals for management<br>For Process safety management (PSM)<br>Chemicals for exposure limits<br>Chemicals for working environment measurement. (Each 6 months)<br>Chemicals for management<br>Chemicals for special health exam. (Each 12 months)<br>Chemicals for exposure limits | Toxic<br>Chemicals for accident prep. | Class 4 the first petroleum (Insoluble) (200 L)        | Designated waste |   |
| 19 | Ethylene glycol      | 107-21-1  | CVD, Dry etching, Wafer processing, Ion implantation                                                                                          | 1181<br>Activation, Estrogen receptor | 1182 Increase, Cell Proliferation (Epithelial Cells) | 1193 N/A, Breast Cancer | Flammable liquid Cat. 2<br>Serious eye damage/eye irritation Cat. 2<br>Specific target organ toxicity (Single exposure) Cat. 3 (Respiratory irritation)<br>Specific target organ toxicity (Single exposure) Cat. 2<br>Specific target organ toxicity (Repeated exposure) Cat. 2                                                                                                                                                                                                  | Chemicals for management<br>Chemicals for special health exam. (Each 12 months)<br>Chemicals for exposure limits                                                                                                                                                                                                                                                                                                                                                                                  | N/A                                   | Class 4 the third petroleum (Water-soluble (4,000 L)   | Designated waste |   |
| 20 | Glycerol             | 56-81-5   | Chip assembly, Solder ball attachment                                                                                                         | 1181<br>Activation, Estrogen receptor | 1182 Increase, Cell Proliferation (Epithelial Cells) | 1193 N/A, Breast Cancer | No data                                                                                                                                                                                                                                                                                                                                                                                                                                                                          | Chemicals for exposure limits                                                                                                                                                                                                                                                                                                                                                                                                                                                                     | N/A                                   | Class 4 the third petroleum (Water-soluble (4000 t)    | N/A              |   |
| 21 | Hexamethyldisilazane | 999-97-3  | HMDS was used to silanize the surface of silicon wafer                                                                                        | 1181<br>Activation, Estrogen receptor | 1182 Increase, Cell Proliferation (Epithelial Cells) | 1193 N/A, Breast Cancer | Flammable liquid Cat. 2<br>Acute toxic (Oral) Cat. 4<br>Acute toxic (dermal) Cat. 3<br>Acute toxic (inhalation: Vapor) Cat. 3<br>Skin corrosion/irritation Cat. 1<br>Serious eye damage/eye irritation Cat. 1<br>Specific target organ toxicity (Single exposure) Cat. 3 (Respiratory irritation)<br>Chronic aquatic toxicity: Cat. 4<br>Acute toxic (Oral): Cat. 4<br>Serious eye damage/eye irritation: Cat. 1<br>Skin sensitization: Cat. 1<br>Germ cell mutagenicity: Cat. 2 | For Process safety management (PSM)                                                                                                                                                                                                                                                                                                                                                                                                                                                               | N/A                                   | Class 4 the first petroleum (Insoluble liquid) (200 L) | N/A              |   |
| 22 | Hydroquinone         | 123-31-9  | A Semiconductor and Fluorescence Dual-Mode Room-Temperature Ammonia Sensor Achieved by Decorating Hydroquinone into a Metal-Organic Framework | 1181<br>Activation, Estrogen receptor | 1182 Increase, Cell Proliferation (Epithelial Cells) | 1193 N/A, Breast Cancer | Carcinogenicity Cat. 2<br>Specific target organ toxicity (Single exposure) Cat. 3 (Respiratory irritation)<br>Specific target organ toxicity (Repeated exposure) Cat. 2<br>Acute aquatic toxicity Cat. 1<br>Chronic aquatic toxicity Cat. 1                                                                                                                                                                                                                                      | Chemicals for working environment measurement. (Each 6 months)<br>Chemicals for management<br>Chemicals for special health exam. (Each 12 months)<br>Chemicals for exposure limits                                                                                                                                                                                                                                                                                                                | Toxic                                 | N/A                                                    | Designated waste |   |
| 23 | Indium arsenide      | 1303-11-3 | A semiconductor composed of indium and arsenic                                                                                                | 1181<br>Activation, Estrogen receptor | 1182 Increase, Cell Proliferation (Epithelial Cells) | 1193 N/A, Breast Cancer | -                                                                                                                                                                                                                                                                                                                                                                                                                                                                                | -                                                                                                                                                                                                                                                                                                                                                                                                                                                                                                 | -                                     | -                                                      | -                | - |
| 24 | Indium phosphide     | 2398-80-7 | Manufacture of semiconductor wafers                                                                                                           | 1181<br>Activation, Estrogen receptor | 1182 Increase, Cell Proliferation (Epithelial Cells) | 1193 N/A, Breast Cancer | Carcinogenicity Cat. 1B<br>Reproductive toxicity Cat. 2<br>Specific target organ toxicity (Single exposure) Cat. 2<br>Specific target organ toxicity (Repeated exposure) Cat. 1                                                                                                                                                                                                                                                                                                  | Chemicals for management (Indium and its compounds)<br>Chemicals for working environment measurement. (Each 6 months)<br>Chemicals for management (Indium and its compounds (From 2021.1.1.))<br>Chemicals for special health exam. (Each 12 months) (Indium and its compounds) (from 2021.1.1.)<br>Chemicals for exposure limits                                                                                                                                                                 | N/A                                   | N/A                                                    | N/A              |   |

|    |                               |           |                                                                                                                                    |                                    |                                                      |                         |                                                                                                                                                                                                                                                                                                                                                   |                                                                                                                                                                                                                           |                                    |                                                    |                  |
|----|-------------------------------|-----------|------------------------------------------------------------------------------------------------------------------------------------|------------------------------------|------------------------------------------------------|-------------------------|---------------------------------------------------------------------------------------------------------------------------------------------------------------------------------------------------------------------------------------------------------------------------------------------------------------------------------------------------|---------------------------------------------------------------------------------------------------------------------------------------------------------------------------------------------------------------------------|------------------------------------|----------------------------------------------------|------------------|
| 25 | Methyl-3-methoxy propionate   | 3852-09-3 | Wafer processing, Photo (PR solvent)                                                                                               | 1181 Activation, Estrogen receptor | 1182 Increase, Cell Proliferation (Epithelial Cells) | 1193 N/A, Breast Cancer | No data                                                                                                                                                                                                                                                                                                                                           | N/A                                                                                                                                                                                                                       | N/A                                | N/A                                                | Designated waste |
| 26 | Naphthalene                   | 91-20-3   | Simple organic semiconductor                                                                                                       | 1181 Activation, Estrogen receptor | 1182 Increase, Cell Proliferation (Epithelial Cells) | 1193 N/A, Breast Cancer | Flammable solid Cat. 2<br>Acute toxic (Oral) Cat. 4<br>Carcinogenicity Cat. 2<br>Acute aquatic toxicity Cat. 1<br>Chronic aquatic toxicity Cat. 1                                                                                                                                                                                                 | Chemicals for exposure limits                                                                                                                                                                                             | N/A                                | N/A                                                | N/A              |
| 27 | n-Butyl alcohol               | 71-36-3   | Semiconductor Manufacturing                                                                                                        | 1181 Activation, Estrogen receptor | 1182 Increase, Cell Proliferation (Epithelial Cells) | 1193 N/A, Breast Cancer | Flammable liquid Cat. 3<br>Skin corrosion/irritation Cat. 2<br>Serious eye damage/eye irritation Cat. 2<br>Specific target organ toxicity (Single exposure) Cat. 3 (Narcotic effect)<br>Aspiration hazard Cat. 2                                                                                                                                  | Chemicals for working environment measurement. (Each 6 months)<br>Chemicals for management<br>Chemicals for special health exam. (Each 12 months)<br>For Process safety management (PSM)<br>Chemicals for exposure limits | N/A                                | Class 4 the second petroleum (Insoluble) (1,000 L) | Designated waste |
| 28 | Nitrioltriacetic acid         | 139-13-9  | Chemical Bath Deposition Of Group Ii-vi Semiconductor Thin Films For Solar Cels Applications                                       | 1181 Activation, Estrogen receptor | 1182 Increase, Cell Proliferation (Epithelial Cells) | 1193 N/A, Breast Cancer | Acute toxic (Oral) Cat. 4<br>Serious eye damage/eye irritation Cat. 2<br>Carcinogenicity Cat. 1B<br>Specific target organ toxicity (Single exposure) Cat. 3 (Respiratory irritation)<br>Specific target organ toxicity (Repeated exposure) Cat. 2<br>Chronic aquatic toxicity Cat. 3                                                              | N/A                                                                                                                                                                                                                       | N/A                                | N/A                                                | N/A              |
| 29 | Nitrobenzene                  | 98-95-3   | Semiconductor Manufacturing                                                                                                        | 1181 Activation, Estrogen receptor | 1182 Increase, Cell Proliferation (Epithelial Cells) | 1193 N/A, Breast Cancer | Acute toxic (Oral) Cat. 4<br>Acute toxic (dermal) Cat. 3<br>Acute toxic (inhalation: Vapor) Cat. 3<br>Carcinogenicity Cat. 2<br>Reproductive toxicity Cat. 2<br>Specific target organ toxicity (Repeated exposure) Cat. 1<br>Chronic aquatic toxicity Cat. 3                                                                                      | Chemicals for working environment measurement. (Each 6 months)<br>Chemicals for management<br>Chemicals for special health exam. (Each 12 months)<br>Chemicals for exposure limits                                        | Toxic Chemicals for accident prep. | Class 4 the third petroleum (Insoluble) (2,000 L)  | Designated waste |
| 30 | Pentaerythritol triacrylate   | 3524-68-3 | Organic semiconductor, CSA-doped PANI as a gate electrode, and cross-linked pentaerythritol triacrylate (PETA) as a gate insulator | 1181 Activation, Estrogen receptor | 1182 Increase, Cell Proliferation (Epithelial Cells) | 1193 N/A, Breast Cancer | Acute toxic (Oral) Cat. 4<br>Skin corrosion/irritation Cat. 2<br>Serious eye damage/eye irritation Cat. 2<br>Skin sensitization Cat. 1                                                                                                                                                                                                            | N/A                                                                                                                                                                                                                       | N/A                                | Class 4 the fourth petroleum (6,000 L)             | N/A              |
| 31 | Perfluorooctane sulfonic acid | 1763-23-1 | Photomicroolithography                                                                                                             | 1181 Activation, Estrogen receptor | 1182 Increase, Cell Proliferation (Epithelial Cells) | 1193 N/A, Breast Cancer | Flammable liquid Cat. 2<br>Acute toxic (Oral) Cat. 4<br>Acute toxic (inhalation: gas) Cat. 4<br>Acute toxic (inhalation: dust/mist) Cat. 4<br>Serious eye damage/eye irritation Cat. 2<br>Carcinogenicity Cat. 2<br>Reproductive toxicity Cat. 1B<br>Specific target organ toxicity (Repeated exposure) Cat. 1<br>Chronic aquatic toxicity Cat. 2 | N/A                                                                                                                                                                                                                       | N/A                                | N/A                                                | N/A              |
| 32 | Phenol                        | 108-95-2  | Chip assembly, Mold etc.                                                                                                           | 1181 Activation, Estrogen receptor | 1182 Increase, Cell Proliferation (Epithelial Cells) | 1193 N/A, Breast Cancer | Acute toxic (Oral) Cat. 3<br>Acute toxic (dermal) Cat. 3<br>Acute toxic (inhalation: dust/mist) Cat. 3<br>Skin corrosion/irritation Cat. 1<br>Serious eye damage/eye irritation Cat. 1<br>Germ cell mutagenicity Cat. 2<br>Specific target organ toxicity (Repeated exposure) Cat. 2<br>Chronic aquatic toxicity Cat. 2                           | Chemicals for working environment measurement. (Each 6 months)<br>Chemicals for management<br>Chemicals for special health exam. (Each 12 months)<br>Chemicals for special management<br>Chemicals for exposure limits    | Toxic Chemicals for accident prep. | N/A                                                | Designated waste |

|    |                                |                                                                |                                                                                                                                                   |                                       |                                                      |                         |                                                                                                                                                                                                                                                                                                                                                                                                                                                                                                                       |                                                                                                                                                                                                                                                                                                                                                                                                      |                                    |                                                 |                  |
|----|--------------------------------|----------------------------------------------------------------|---------------------------------------------------------------------------------------------------------------------------------------------------|---------------------------------------|------------------------------------------------------|-------------------------|-----------------------------------------------------------------------------------------------------------------------------------------------------------------------------------------------------------------------------------------------------------------------------------------------------------------------------------------------------------------------------------------------------------------------------------------------------------------------------------------------------------------------|------------------------------------------------------------------------------------------------------------------------------------------------------------------------------------------------------------------------------------------------------------------------------------------------------------------------------------------------------------------------------------------------------|------------------------------------|-------------------------------------------------|------------------|
| 33 | Piperazine                     | 110-85-0                                                       | Chip assembly, Rear Grinding                                                                                                                      | 1181<br>Activation, Estrogen receptor | 1182 Increase, Cell Proliferation (Epithelial Cells) | 1193 N/A, Breast Cancer | Acute toxic (Oral) Cat. 4<br>Acute toxic (dermal) Cat. 4<br>Skin corrosion/irritation Cat. 1<br>Serious eye damage/eye irritation Cat. 1<br>Respiratory sensitization Cat. 1<br>Skin sensitization Cat. 1<br>Reproductive toxicity Cat. 2<br>Specific target organ toxicity (Single exposure) Cat. 2<br>Specific target organ toxicity (Repeated exposure) Cat. 1                                                                                                                                                     | N/A                                                                                                                                                                                                                                                                                                                                                                                                  | N/A                                | N/A                                             | N/A              |
| 34 | Potassium dichromate           | 7778-50-9                                                      | Photocatalytic reduction using UV radiation and ZnO semiconductor catalyst has been investigated using potassium dichromate as the model Compound | 1181<br>Activation, Estrogen receptor | 1182 Increase, Cell Proliferation (Epithelial Cells) | 1193 N/A, Breast Cancer | Oxidizing solids Cat. 2<br>Acute toxic (Oral) Cat. 3<br>Acute toxic (dermal) Cat. 4<br>Acute toxic (inhalation: gas) Cat. 2<br>Acute toxic (inhalation: dust/mist) Cat. 2<br>Serious eye damage/eye irritation Cat. 2<br>Respiratory sensitization Cat. 1<br>Skin sensitization Cat. 1<br>Germ cell mutagenicity Cat. 1B<br>Carcinogenicity Cat. 1A<br>Reproductive toxicity Cat. 1B<br>Specific target organ toxicity (Repeated exposure) Cat. 1<br>Acute aquatic toxicity Cat. 1<br>Chronic aquatic toxicity Cat. 1 | Chemicals for working environment measurement<br>Chemicals for working environment measurement. (Each 6 months)<br>Chemicals for management<br>Chemicals for special health exam.<br>Chemicals for special health exam. (Each 12 months)<br>Chemicals for special management<br>Chemicals for exposure limits<br>Chemicals for acceptance criteria<br>Chemicals for working environment measurement. | Toxic Restricted chemical          | Class 1: Dichromic acids (1000 kg)              | Designated waste |
| 35 | Tetrachloroethylene            | 127-18-4                                                       | Mold, Chip adhesion, Chip assembly, Testing                                                                                                       | 1181<br>Activation, Estrogen receptor | 1182 Increase, Cell Proliferation (Epithelial Cells) | 1193 N/A, Breast Cancer | Skin corrosion/irritation Cat. 2<br>Carcinogenicity Cat. 1B<br>Specific target organ toxicity (Single exposure) Cat. 3 (Narcotic effect)<br>Chronic aquatic toxicity Cat. 2                                                                                                                                                                                                                                                                                                                                           | Chemicals for management<br>Chemicals for special health exam. (Each 12 months)<br>Chemicals for special management<br>Chemicals for exposure limits                                                                                                                                                                                                                                                 | Toxic Restricted chemical          | N/A                                             | Designated waste |
| 36 | Tetramethyl ammonium hydroxide | 75-59-2<br>10424-6-5 (Trihydrate)<br>10424-65-4 (Pentahydrate) | Wafer processing, Chip assembly, Photo (developer), Rear grinding                                                                                 | 1181<br>Activation, Estrogen receptor | 1182 Increase, Cell Proliferation (Epithelial Cells) | 1193 N/A, Breast Cancer | Acute toxic (Oral) Cat. 2<br>Acute toxic (dermal) Cat. 1<br>Skin corrosion/irritation Cat. 1<br>Serious eye damage/eye irritation Cat. 1<br>Chronic aquatic toxicity Cat. 2                                                                                                                                                                                                                                                                                                                                           | Chemicals for exposure limits                                                                                                                                                                                                                                                                                                                                                                        | Toxic                              | N/A                                             | Designated waste |
| 37 | Toluene                        | 108-88-3                                                       | Chip assembly, Mold, etc.                                                                                                                         | 1181<br>Activation, Estrogen receptor | 1182 Increase, Cell Proliferation (Epithelial Cells) | 1193 N/A, Breast Cancer | Flammable liquid Cat. 2<br>Skin corrosion/irritation Cat. 2<br>Reproductive toxicity Cat. 2<br>Specific target organ toxicity (Single exposure) Cat. 3 (Narcotic effect)<br>Specific target organ toxicity (Repeated exposure) Cat. 2<br>Aspiration hazard Cat. 1                                                                                                                                                                                                                                                     | Chemicals for working environment measurement. (Each 6 months)<br>Chemicals for management<br>Chemicals for special health exam. (Each 12 months)<br>For Process safety management (PSM)<br>Chemicals for exposure limits<br>Chemicals for acceptance criteria                                                                                                                                       | Toxic Chemicals for accident prep. | Class 4 the first petroleum (Insoluble) (200 L) | Designated waste |
| 38 | Trimellitic anhydride          | 552-30-7                                                       | Semiconductor assemblies having electrophoretically insulated vias                                                                                | 1181<br>Activation, Estrogen receptor | 1182 Increase, Cell Proliferation (Epithelial Cells) | 1193 N/A, Breast Cancer | Serious eye damage/eye irritation Cat. 1<br>Respiratory sensitization Cat. 1<br>Skin sensitization Cat. 1<br>Specific target organ toxicity (Single exposure) Cat. 3 (Respiratory irritation)<br>Acute toxic (Oral) Cat. 4                                                                                                                                                                                                                                                                                            | Chemicals for exposure limits                                                                                                                                                                                                                                                                                                                                                                        | N/A                                | N/A                                             | Designated waste |
| 39 | Zinc chloride fume             | 7646-85-7                                                      | Semiconductor Manufacturing                                                                                                                       | 1181<br>Activation, Estrogen receptor | 1182 Increase, Cell Proliferation (Epithelial Cells) | 1193 N/A, Breast Cancer | Serious eye damage/eye irritation Cat. 1<br>Germ cell mutagenicity Cat. 2<br>Acute aquatic toxicity Cat. 1<br>Chronic aquatic toxicity Cat. 1                                                                                                                                                                                                                                                                                                                                                                         | Chemicals for management<br>Chemicals for exposure limits                                                                                                                                                                                                                                                                                                                                            | Toxic                              | N/A                                             | Designated waste |

|    |                                     |            |                                                                                                                                                    |                                                                             |                                                                                                                                                                                                    |                            |                                                                                                                                                   |                                                                                                                                                                                                                                                            |                                 |     |     |
|----|-------------------------------------|------------|----------------------------------------------------------------------------------------------------------------------------------------------------|-----------------------------------------------------------------------------|----------------------------------------------------------------------------------------------------------------------------------------------------------------------------------------------------|----------------------------|---------------------------------------------------------------------------------------------------------------------------------------------------|------------------------------------------------------------------------------------------------------------------------------------------------------------------------------------------------------------------------------------------------------------|---------------------------------|-----|-----|
| 40 | Nitric oxide<br>(Nitrogen monoxide) | 10102-43-9 | Wafer processing,<br>Diffusion                                                                                                                     | 1632 Increase<br>in reactive<br>oxygen and<br>nitrogen<br>species<br>(RONS) | 1182 Increase, Cell<br>Proliferation (Epithelial<br>Cells)<br>1492 Tissue resident<br>cell activation<br>1493 Increased Pro-<br>inflammatory mediators<br>1494 Leukocyte<br>recruitment/activation | 1193 N/A, Breast<br>Cancer | Oxidizing gas Cat. 1<br>Compressed gas<br>Acute toxic (inhalation: gas)<br>Cat. 2<br>Specific target organ toxicity<br>(Single exposure) Cat. 1   | Chemicals for<br>working<br>environment<br>measurement.<br>(Each 6 months)<br>Chemicals for<br>management<br>Chemicals for<br>special health<br>exam. (Each 12<br>months)<br>For Process safety<br>management<br>(PSM)<br>Chemicals for<br>exposure limits | Chemicals for<br>accident prep. | N/A | N/A |
| 41 | Nitrogen trifluoride                | 7783-54-2  | A high purity special<br>gas used as a cleaning<br>agent for<br>semiconductor and<br>LCD manufacturing<br>equipment, and as a<br>dry etching agent | 1632 Increase<br>in reactive<br>oxygen and<br>nitrogen<br>species<br>(RONS) | 1182 Increase, Cell<br>Proliferation (Epithelial<br>Cells)<br>1492 Tissue resident<br>cell activation<br>1493 Increased Pro-<br>inflammatory mediators<br>1494 Leukocyte<br>recruitment/activation | 1193 N/A, Breast<br>Cancer | Oxidizing gas Cat. 1<br>Compressed gas<br>Acute toxic (inhalation: gas)<br>Cat. 4<br>Specific target organ toxicity<br>(Repeated exposure) Cat. 2 | For Process safety<br>management<br>(PSM)<br>Chemicals for<br>exposure limits                                                                                                                                                                              | N/A                             | N/A | N/A |

---
